# Supplementary material for: Variations of intracellular density during the cell cycle arise from tip-growth regulation in fission yeast
Source: eLife. 2021 Jun 8;10:e64901. doi: 10.7554/eLife.64901 (PMC8221806; doi:10.7554/eLife.64901)
Supplement: Figure 1—figure supplement 1—source data 1. [file elife-64901-fig1-figsupp1-data1.xlsx]

## Sheet: Fig1S1C_Density_RefrInd
WT 30C	WT 25 -> 34C	WT 25 -> 30C	WT 25C		Cell length (µm)	Refractive index
287.7	311.95	253.05	263.235		6.30317	1.35154
266.861	309.253	248.998	261.817		6.61661	1.3488
308.834	321.12	270.562	256.673		6.75271	1.34596
306.782	329.603	281.346	284.4		6.78574	1.34796
292.117	304.375	290.985	296.69		6.85764	1.34898
277.057	317.732	294.055	302.048		6.88763	1.34958
302.318	285.411	310.951	311.031		6.92515	1.34836
296.796	312.139	295.384	270.324		6.9682	1.34586
309.356	297.144	301.848	261.228		7.04548	1.34805
297.952	309.67	282.054	272.435		7.05606	1.34808
274.55	265.876	285.23	261.967		7.08912	1.34899
271.4	308.792	292.557	292.692		7.10035	1.34799
309.617	264.592	288.323	279.999		7.28256	1.34915
288.458	310.208	288.695	273.107		7.29562	1.34868
320.96	255.608	284.539	261.616		7.33348	1.34933
278.594	290.138	285.588	282.175		7.34431	1.34855
273.782	259.507	293.863	272.835		7.35339	1.3481
272.291	292.556	293.387	277.081		7.38329	1.34934
279.677	262.01	287.785	250.861		7.40724	1.349
265.251	289.103	287.196	290.916		7.42914	1.34782
293.803	245.698	284.77	276.665		7.44115	1.34936
315.64	282.772	282.938	283.08		7.45936	1.34708
296.104	253.345	290.077	275.57		7.48883	1.34907
276.755	293.353	294.507	280.795		7.50776	1.34727
313.514	250.488	283.453	280.788		7.52486	1.34854
280.33	303.17	288.94	285.36		7.60314	1.34745
270.83	244.392	279.71	269.488		7.60552	1.34875
310.488	279.361	282.071	261.05		7.61426	1.34813
276.252	242.878	273.565	253.832		7.67931	1.34926
274.291	274.797	275.856	270.599		7.78628	1.34909
304.377	292.469	267.548	259.687		7.80144	1.34616
278.411	265.545	273.829	259.524		7.83978	1.34929
280.214	255.007	272.314	257.12		7.84601	1.35006
297.983	289.715	286.147	254.136		7.89778	1.34789
293.624	298.777	267.697	253.899		7.97652	1.34829
315.695	271.246	272.331	265.532		7.98271	1.34913
274.87	264.782	267.09	267.868		8.02495	1.34748
264.847	297.548	238.039	281.317		8.13437	1.34991
282.15	287.463	247.846	272.086		8.18156	1.34863
270.037	248.793	245.674	275.69		8.21387	1.34877
298.845	279.418	257.264	250.144		8.23504	1.34834
286.298	289.293	263.145	276.814		8.2654	1.35084
279.954	289.539	254.298	254.817		8.28722	1.34963
274.801	259.626	240.989	251.643		8.29178	1.34784
287.124	255.741	243.422	289.954		8.33093	1.35141
278.074	263.126	239.143	268.381		8.33754	1.34801
292.072	263.55	237.806	256.134		8.34508	1.34815
293.316	248.275	261.436	285.308		8.36755	1.3481
296.16	259.808	250.246	264.66		8.40127	1.349
276.919	289.484	270.481	264.28		8.55223	1.34792
284.18	284.997	255.888	295.607		8.57313	1.34818
260.027	250.413	262.388	266.719		8.59794	1.3473
287.326	275.572	252.674	264.792		8.61054	1.34869
299.625	270.33	266.26	304.889		8.6388	1.34945
275.449	283.489	250.928	289.23		8.63965	1.34776
278.626	281.936	262.742	249.339		8.64539	1.34952
295.817	302.74	258.625	287.49		8.67197	1.34872
302.659	256.67	256.976	273.322		8.68185	1.34798
265.403	327.903	255.272	241.064		8.68441	1.34442
255.76	259.888	267.984	290.973		8.75239	1.34793
286.518	313.936	249.328	275.15		8.76084	1.34796
292.71	270.521	260.183	227.58		8.79878	1.35
285.826	298.305	254.561	265.427		8.93946	1.34779
292.907	268.444	263.324	255.429		8.95081	1.3484
280.988	278.878	257.585	227.947		8.98306	1.34726
293.206	277.731	267.315	238.8		9.03964	1.34944
276.75	250.314	251.22	273.799		9.10904	1.34767
277.412	268.935	258.283	270.22		9.13483	1.34756
304.09	307.584	255.722	252.097		9.15417	1.34827
278.64	260.199	266.621	254.758		9.25878	1.34694
280.412	234.837	263.927	296.917		9.2749	1.34857
286.368	291.394	266.408	291.753		9.27896	1.34743
283.75	304.146	271.049	267.874		9.29244	1.34664
263.45	249.146	269.897	241.926		9.32629	1.34933
273.859	244.048	280.172	287.791		9.36067	1.34798
294.519	313.18	281.042	281.15		9.43876	1.3465
292.578	291.238	277.409	267.681		9.50862	1.34818
290.997	312.419	282.974	257.255		9.52317	1.34682
289.685	243.419	276.965	292.631		9.53595	1.34651
276.953	236.648	289.121	290.446		9.58819	1.34848
308.356	280.035	260.868	270.791		9.66089	1.34875
305.736	306.772	269.246	250.95		9.66863	1.34804
294.751	237.178	284.502	287.164		9.68031	1.34724
290.088	244.04	258.056	292.683		9.74321	1.34905
291.527	285.529	276.428	277.693		9.76374	1.34771
284.396	307.546	281.546	248.742		9.85474	1.34754
297.872	239.293	254.846	279.253		9.86722	1.34717
302.644	250.113	248.096	267.713		9.86953	1.34664
298.001	277.662	278.205	271.546		9.87753	1.34647
296.5	293.555	285.534	241.266		9.92814	1.34715
301.621	245.831	265.443	278.182		9.94565	1.34694
295.209	249.028	262.281	263.612		9.9787	1.34581
295.929	266.048	273.876	256.078		10.0073	1.34695
286.842	285.659	272.703	254.363		10.031	1.34462
287.532	230.435	265.372	261.471		10.0704	1.34706
286.384	236.053	268.573	263.863		10.1419	1.34942
295.101	268.856	267.486	249.534		10.1822	1.34695
280.665	275.203	286.718	245.477		10.2026	1.34736
296.436	232.357	268.319	254.35		10.2844	1.34602
314.745	239.054	269.037	242.385		10.342	1.34736
304.837	260.324	265.821	237.289		10.3583	1.34806
275.906	276.867	283.7	282.358		10.4112	1.34661
301.305	251.352	269.596	284.121		10.4414	1.34727
277.179	261.443	268.125	276.06		10.4765	1.34584
274.763	257.901	258.976	259.907		10.4823	1.34638
315.216	263.861	273.833	237.989		10.4858	1.34753
286.395	266.061	263.347	252.846		10.5857	1.34867
279.51	276.578	264.818	276.416		10.6559	1.34784
288.765	257.756	265.955	258.877		10.6685	1.34772
256.397	254.625	278.877	251.025		10.6747	1.3476
292.907	291.149	258.902	265.985		10.6828	1.33996
289.595	263.51	261.374	273.305		10.7258	1.34702
269.922	273.471	265.641	298.544		10.735	1.34774
282.27	259.305	278.606	269.309		10.7418	1.34964
274.084	250.178	267.251	269.961		10.7472	1.34904
267.784	286.863	264.441	254.43		10.7959	1.34759
278.181	309.121	268.262	278.911		10.805	1.34707
277.848	246.58	278.97	305.007		10.8065	1.34783
303.594	261.743	270.628	266.888		10.8416	1.34872
287.191	259.63	270.661	265.011		10.8659	1.34628
282.724	253.847	271.126	216.516		10.9321	1.34778
278.171	264.114	270.997	229.63		10.946	1.34777
272.038	259.095	259.676	275.551		11.0498	1.34703
240.634	301.142	278.075	247.958		11.0636	1.34608
282.794	251.439	253.99	253.349		11.1269	1.34829
294.738	264.901	265.72	238.045		11.1509	1.3497
290.53	271.967	259.053	230.573		11.1832	1.3484
285.728	237.978	258.069	239.079		11.1971	1.34287
296.837	267.785	266.405	272.081		11.2238	1.34867
280.545	276.242	267.524	251.652		11.2557	1.34717
263.376	318.826	260.033	244.12		11.2693	1.34641
278.501	248.017	251.842	252.928		11.2846	1.34817
282.149	260.251	268.187	241.67		11.4268	1.34844
267.157	262.336	274.702	264.638		11.5201	1.34869
299.892	252.421	254.359	304.029		11.5227	1.34614
310.203	254.777	239.761	281.354		11.6008	1.34588
283.871	234.014	259.222	269.968		11.6129	1.34769
270.539	279.53	271.058	288.718		11.6248	1.34943
286.554	310.57	248.521	245.543		11.7178	1.34667
290.249	255.19	255.883	270.216		11.8093	1.34937
279.712	263.501	257.146	302.434		11.8442	1.34682
289.439	265.849	262.228	291.718		11.9453	1.34749
279.628	247.001	255.821	267.866		11.964	1.34822
290.48	244.676	243.167	269.368		12.1247	1.34813
286.641	256.924	274.476	258.17		12.1569	1.3473
277.317	350.214	274.676	240.082		12.23	1.34719
282.788	317.26	259.08	265.564		12.3487	1.34567
275.822	347.236	249.254	290.381		12.3593	1.34838
262.467	331.03	262.247	294.502		12.3872	1.34587
279.181	301.885	271.172	258.631		12.4475	1.34884
287.6	295.429	247.08	278.516		12.4605	1.346
272.552	336.703	258.978	261.391		12.4768	1.34897
273.628	283.534	261.886	250.094		12.5036	1.34639
294.63	273.852	258.225	264.913		12.5448	1.34745
311.183	316.941	237.673	292.854		12.6643	1.3456
292.866	311.271	256.751	268.262		12.7547	1.34566
294.624	308.217	259.556	255.859		12.7931	1.34967
278.329	323.094	244.838	280.343		13.0001	1.34579
285.622	292.413	239.212	270.274		13.0841	1.34757
301.464	309.868	251.514	274.783		13.1769	1.34911
278.326	307.264	257.3	273.27		13.2427	1.34779
281.93	310.929	258.033	283.664		13.2572	1.34723
317.373	294.205	237.034	297.788		13.3179	1.34859
306.488	293.525	244.037	282.659		13.6695	1.34942
293.743	295.594	269.816	259.562
293.52	308.105	261.989	282.04
276.784	295.572	240.776	259.984
273.638	293.509	246.3	254.979
318.6	294.195	255.894	246.42
313.022	291.45	257.443	277.435
305.225	261.756	239.8	261.452
275.836	288.974	237.601	262.989
298.274	311.925	272.293	258.109
297.743	299.256	276.964	279.906
279.323	252.598	261.228	283.92
283.006	293.551	256.936	259.75
309.175	333.903	276.648	256.743
299.037	300.976	286.169	274.351
283.561	253.621	261.251	256.82
273.749	289.17	247.498	250.791
300.522	335.867	283.754	243.345
276.659	290.909	298.787	257.144
283.692	252.902	266.472	241.462
304.435	294.766	256.439	272.406
285.806	318.385	310.229	247.423
269.884	295.899	279.927	264.042
302.459	288.264	301.19	245.941
264.904	262.783	279.601	259.458
289.85	300.046	291.055	242.766
305.252	323.483	261.372	266.09
278.926	330.266	298.059	250.669
297.77	330.259	278.233	290.787
279.604	267.845	288.818	264.367
272.65	284.717	272.217	268.521
288.931	297.486	303.001	274.597
269.137	318.255	280.355	279.078
281.561	283.672	306.435	285.078
296.797	321.489	276.502	266.879
282.964	282.386	304.074	266.303
279.721	267.29	271.298	260.138
278.656	287.293	295.822	293.042
257.43	292.644	268.489	283.638
279.146	283.949	269.502	269.92
296.328	305.805	262.983	300.448
288.621	322.438	293.432	277.346
285.228	294.188	275.086	258.346
292.448	285.296	284.146	266.132
268.159	287.776	284.866	279.524
255.907	300.038	289.951	268.497
283.06	276.28	275.33	256.387
282.351	302.051	270.081	259.42
275.308	320.659	257.777	270.66
287.958	318.279	296.574	252.65
306.586	287.95	279.881	245.926
271.692	265.72	299.19	276.189
274.615	304.836	285.19	282.263
293.826	296.216	267.303	268.028
286.714	274.75	270.694	248.173
277.658	280.412	294.913	270.057
286.222	303.95	275.532	282.806
301.672	298.724	306.914	264.441
299.336	269.304	273.724	256.554
285.756	277.263	293.757	261.899
283.46	289.269	277.194	272.927
291.287	276.002	304.624	247.303
280.098	258.175	286.204	245.91
270.434	271.577	298.75	273.301
273.922	296.058	280.035	279.188
299.927	270.142	285.309	258.75
268.617	282.437	268.935	257.604
275.808	267.322	307.25	277.167
290.919	270.363	282.522	305.435
301.158	265.8	319.46	260.848
285.15	255.268	291.321	279.664
292.739	267.295	302.743	254.626
272.627	277.589	291.531	285.247
303.792	275.479	289.068	255.28
305.314	265.833	294.522	249.67
295.093	261.396	285.039	242.678
304.261	283.043	301.266	275.134
287.037	276.85	289.794	241.989
293.167	255.233	288.2	244.237
283.912	255.604	277.133	258.674
281.4	277.904	288.388	273.246
302.412	260.401	283.744	247.124
296.816	262.606	282.095	239.174
309.993	256.677	279.141	256.719
297.83	295.906	290.23	284.588
307.213	258.107	299.056	248.571
273.897	262.389	283.261	247.241
294.994	288.218	272.683	228.261
294.181	272.953	251.496	266.067
283.135	243.119	283.322	220.548
288.398	264.841	286.138	235.849
295.692	251.436	264.642	246.403
301.177	325.348	268.737	288.056
268.221	254.659	292.511	236.887
276.373	267.42	279.622	247.388
295.629	290.248	271.603	245.2
277.908	282.763	263.313	277.192
284.616	245.895	286.415	244.434
321.227	261.483	291.307	242.754
294.407	257.666	273.736	256.719
283.313	263.224	268.507	278.684
307.09	285.532	299.799	264.961
268.558	306.236	288.572	245.954
282.212	303.073	278.033	278.191
300.355	288.074	275.18	290.725
282.88	299.248	298.284	283.618
281.784	285.061	293.365	262.776
277.011	293.399	274.468	261.737
267.728	274.852	271.244	271.206
281.59	294.719	293.699	257.726
270.887	274.756	276.613	254.075
287.079	268.239	279.231	290.845
294.512	276.691	270.436	290.945
292.557	265.569	302.035	255.268
289.382	274.67	277.59	256.491
280.532	268.839	285.501	276.188
261.313	272.651	269.685	264.079
287.231	268.49	308.43	290.025
305.673	252.959	293.009	317.836
299.257	247.836	271.953	268.906
289.915	269.094	258.028	260.54
286.351	272.484	303.623	283.882
273.921	272.073	286.215	268.56
242.14	278.029	259.534	243.818
273.412	278.245	260.466	270.372
282.751	283.565	309.38	308.836
264.324	287.432	272.43	260.378
278.82	275.892	266.172	261.496
307.91	284.008	258.634	264.11
287.663	301.337	295.761	262.437
278.376	289.476	278.701	265.924
289.265	301.254	256.769	269.582
296.468	279.76	253.427	287.583
284.509	279.048	306.646	260.76
303.48	276.743	270.038	294.142
298.759	289.821	268.339	268.23
294.003	268.386	259.202	274.836
285.857	266.161	314.365	274.164
284.379	270.77	269.915	284.82
290.751	277.321	266.81	289.562
293.128	266.505	251.713	297.475
285.544	272.336	296.2	299.569
272.231	282.866	267.713	282.515
284.865	281.763	271.682	290.121
277.739	265.655	247.505	277.961
276.345	250.181	300.599	279.542
296.178	267.079	270.713	273.413
293.525	275.638	259.801	283
280.233	245.011	240.608	274.535
282.766	257.721	308.572	284.08
272.064	269.872	275.34	284.533
289.013	263.21	269.824	282.979
293.358	288.748	257.573	283.969
286.682	302.55	297.399	291.065
288.215	282.772	267.259	279.467
308.922	296.821	265.24	278.74
316.057	275.765	253.408	271.789
297.839	291.343	300.916	278.302
290.061	277.077	269.89	279.819
298.701	287.697	264.284	276.555
291.904	284.409	257.342	268.559
311.954	281.969	291.236	270.588
288.551	268.073	265.958	270.947
313.492	272.469	261.08	271.655
278.062	280.715	255.838	267.015
288.33	267.691	291.572	267.502
294.225	278.269	267.041	264.194
296.231	269.991	259.218	280.681
286.413	302.568	258.084	251.065
313.166	280.078	289.897	275.348
295.225	289.226	278.47	259.18
265.866	252.964	269.926	291.594
283.787	281.138	256.202	300.06
305.168	286.259	287.614	310.627
279.751	264.993	279.291	289.514
271.724	281.142	260.099	305.643
314.076	292.331	264.619	293.338
284.854	286.103	287.625	293.267
291.969	291.686	281.158	308.345
305.696	278.361	284.738	295.246
268.311	292.039	267.163	283.467
285.874	283.187	286.688	267.99
302.734	287.2	295.172	308.043
290.012	296.449	273.578	284.902
303.098	315.4	260.37	292.822
279.525	303.989	290.12	286.883
259.219	271.948	301.577	314.826
279.975	265.335	294.937	286.053
258.702	294.039	260.138	286.276
284.447	258.094	293.36	261.745
270.561	246.321	303.839	305.562
296.325	244.246	288.437	287.611
289.795	260.351	271.053	277.383
284.469	241.66	311.06	258.989
262.395	277.266	284.507	294.17
289.34	278.891	283.216	267.317
298.481	308.161	288.96	258.846
314.812	281.501	272.42	254.268
283.611	262.661	284.262	287.115
280.633	275.039	302.648	272.372
265.324	290.299	277.575	266.857
244.627	266.54	282.669	251.88
261.077	251.83	298.561	266.14
279.82	258.728	257.253	262.717
255.388	304.719	280.893	261.598
282.327	308.516	303.958	259.754
317.781	260.384	275.524	279.406
282.805	255.223	285.722	271.322
272.529	287.127	287.42	262.85
289.55	292.688	268.725	258.252
288.77	303.121	284.892	274.843
280.737	288.634	309.571	261.08
294.341	295.784	281.463	255.286
285.592	308.633	283.136	253.298
294.425	289.331	300.252	277.281
277.43	230.509	274.073	247.87
272.831	232.955	306.866	262.247
290.91	253.808	322.811	254.165
287.429	252.912	282.817	277.549
292.318	264.686	284.056	256.539
281.643	254.27	289.78	256.308
283.6	318.122	269.212	249.994
269.052	301.316	279.385	280.174
274.631	308.801	298.327	255.434
309.609	297.233	272.623	254.325
300.898	344.922	283.023	276.076
310.437	282.018	266.502	281.167
291.38	357.95	298.011	272.012
285.292	324.337	262.651	272.509
294.868	373.518	259.829	255.271
294.896	348.938	287.341	264.063
299.45	342.879	297.858	258.536
298.024	338.301	260.184	254.523
299.698	323.989	286.484	261.249
302.577	320.429	271.823	279.251
300.724	320.92	298.009	279.45
307.927	306.193	248.308	280.206
294.06	304.212	274.306	268.058
285.943	285.975	288.392	280.852
301.067	289.199	301.477	277.534
290.663	290.017	269.978	291.793
302.633	306.998	285.553	269.544
284.159	286.486	297.141	288.694
287.142	280.365	306.069	293.15
288.179	293.429	258.875	299.816
285.907	284.307	284.632	283.405
282.033	280.073	292.639	290.899
296.968	273.879	313.517	301.115
296.523	276.769	286.191	294.668
275.858	275.836	280.997	251.38
275.033	263.944	274.323	261.214
310.355	283.88	292.245	296.033
283.242	285.063	256.02	281.929
267.882	281.175	285.269	284.681
324.66	269.861	279.915	262.97
289.337	278.722	298.976	267.828
283.009	272.011	271.28	250.409
294.492	280.371	290.259	267.681
266.317	272.931	281.608	286.19
293.774	298.613	277.596	283.248
306.173	279.192	283.317	259.124
297.841	280.607	273.633	289.808
290.805	273.455	277.272	271.569
272.446	277.311	275.618	274.046
265.174	255.132	271.61	261.792
287.84	261.981	260.419	277.611
273.986	265.51	261.978	245.128
290.52	264.683	268.686	252.772
271.616	250.44	262.626	257.952
291.397	258.127	264.132	270.404
275.392	261.376	250.126	282.294
272.703	281.961	269.721	270.114
257.027	264.373	256.184	290.634
278.171	273.348	254.76	288.769
289.137	285.111	251.531	294.517
285.623	297.731	264.443	267.847
278.861	285.62	247.941	270.345
293.491	287.792	264.748	280.907
277.782	272.715	255.884	274.93
250.045	279.478	257.5	267.511
277.224	319.315	250.151	263.049
280.862	280.141	258.399	270.924
262.331	329.774	253.313	276.873
293.715	277.654	249.933	261.473
321.885	298.002	250.831	257.883
289.587	279.667	261.157	258.956
265.916	310.358	258.85	259.296
274.024	277.442	268.629	263.697
290.072	296.533	256.13	263.041
283.681	306.966	266.021	274.57
293.995	278.209	255.982	272.755
290.389	302.837	247.54	261.391
280.19	270.166	261.426	259.976
288.899	301.271	255.903	261.007
280.117	302.494	243.132	260.52
289.309	293.834	249.782	250.091
298.411	285.766	266.152	255.126
280.803	275.436	311.727	252.187
265.224	289.639	274.691	251.732
279.436	302.749	309.046	249.554
275.536	273.027	268.635	245.745
272.503	301.818	295.534	246.155
294.831	286.108	298.655	248.798
311.495	277.012	283.818	248.333
307.252	270.914	272.992	244.136
284.345	260.806	246.956	255.037
279	298.15	250.924	262.117
287.653	290.582	269.326	247.202
292.452	271.911	268.773	248.845
288.045	287.135	292.009	268.353
297.552	292.818	273.538	271.034
293.703	276.482	263.745	266.79
305.549	290.553	263.686	265.437
298.195	272.061	272.826	275.055
297.265	292.871	259.152	293.843
295.214	314.632	270.4	258.068
292.944	268.359	261.944	269.58
297.309	302.215	298.447	278.508
276.169	303.467	280.43	276.08
310.944	326.844	284.309	252.134
279.541	293.686	284.182	251.786
292.284	278.176	262.257	278.944
296.101	287.095	266.531	270.235
304.295	276.111	274.195	272.7
284.313	291.202	273.109	262.936
307.225	283.921	286.184	286.273
293.721	273.661	274.285	279.73
262.651	273.243	263.801	270.071
277.407	259.844	273.205	246.362
301.234	265.416	267.673	266.137
278.003	270.605	272.866	265.939
259.555	283.421	280.08	247.846
306.614	260.325	265.239	228.244
294.467	268.609	275.617	255.435
287.065	247.558	266.697	262.222
304.91	242.74	268.551	252
268.676	260.891	265.985	247.706
289.768	254.116	273.135	278.446
307.334	255.108	272.486	274.803
278.405	246.814	272.229	264.368
284.979	239.929	272.105	257.928
289.16	245.644	274.915	281.288
261.931	289.416	263.252	268.131
282.592	288.053	280.328	256.349
270.732	302.588	271.083	257.07
285.379	296.606	270.181	277.973
271.23	284.106	261.858	267.038
288.62	289.032	279.299	258.417
276.286	278.634	275.427	261.961
287.763	279.38	266.257	271.723
268.948	294.421	257.277	256.668
281.551	290.862	293.682	257.687
290.105	297.656	285.081	253.92
282.876	269.024	289.717	265.234
286.197	301.824	289.045	255.804
296.29	292.415	298.227	259.191
263.749	294.973	280.296	247.027
255.347	266.97	314.653	265.803
274.489	273.841	296.905	268.739
281.814	276.478	311.616	267.032
264.967	294.762	293.145	244.948
284.611	257.364	317.404	265.968
309.487	254.765	299.898	254.104
277.929	251.312	328.235	261.32
273.191	261.27	319.121	245.361
282.369	247.528	307.968	276.324
286.019	284.466	319.364	263.265
279.254	291.341	294.922	262.1
305.103	306.353	317.285	244.139
294.144	275.769	290.55	269.687
291.64	317.859	307.448	263.399
306.679	275.722	292.216	278.595
289.054	316.209	306.319	255.851
303.177	279.943	294.992	284.552
292.424	302.613	305.823	272.045
288.279	269.227	294.267	286.664
269.104	300.263	320.458	249.204
281.295	269.488	310.821	285.004
273.379	290.736	304.137	265.584
270.028	258.898	298.413	247.44
278.495	300.8	316.116	247.193
304.429	259.045	321.081	234.496
278.911	295.084	304.54	246.591
306.133	267.971	300.622	217.843
292.27	294.24	307.45	215.272
298.447	258.708	306.06	231.097
306.114	298.092	281.086	238.008
280	256.291	281.092	222.401
282.559	315.141	303.729	262.303
280.89	282.34	300.554	271.338
290.636	266.067	301.21	247.547
279.963	305.173	292.893	258.156
273.209	290.343	298.426	265.925
298.801	271.923	311.906	255.038
292.561	308.016	297.95	240.959
284.646	261.386	286.049	260.179
278.896	263.358	293.315	276.505
307.695	272.94	309.45	245.904
276.245	308.978	290.425	242.04
287.267	272.257	299.17	266.87
277.515	281.173	293.991	251.509
290.232	268.976	296.764	255.584
281.144	314.082	285.568	237.805
302.793	268.875	290.146	248.739
313.193	289.616	292.528	266.351
275.804	281.044	294.62	248.646
275.384	299.423	275.784	242.264
303.791	270.57	278.086	268.974
277.123	272.466	291.368	254.27
262.485	278.646	304.653	258.742
302.499	288.51	274.621	262.336
274.21	259.318	287.448	266.744
281.068	268.058	296.514	263.608
292.202	288.496	294.217	291.31
263.502	302.197	266.265	286.152
281.206	252.547	281.804	295.958
306.159	250.02	281.527	278.598
274.61	298.972	275.257	289.731
272.376	290.654	273.941	260.867
273.956	254.846	265.117	273.652
260.956	246.859	283.025	257.6
294.536	325.255	286.878	273.301
272.083	294.051	277.291	242.102
286.238	245.662	273.538	253.702
280.825	255.331	292.652	270.294
295.775	314.332	287.424	277.295
276.513	297.306	284.777	270.097
281.416	297.766	270.021	286.562
265.435	289.303	288.028	254.906
290.497	284.322	287.247	270.305
283.942	285.16	270.663	247.568
302.556	280.367	278.125	257.842
275.189	276.967	287.033	258.266
294.173	277.695	288.414	263.5
265.502	274.358	272.297	255.158
247.515	263.459	273.803	254.109
260.996	287.36	282.207	252.633
268.915	283.239	285.384	248.599
264.98	270.74	266.48	245.005
286.215	271.275	253.558	259.156
305.625	274.321	278.102	245.395
270.759	273.171	272.325	257.001
269.291	278.234	273.04	254.146
271.704	261.383	258.147	253.636
278.209	283.715	270.177	249.844
278.76	277.148	279.838	248.93
293.957	267.608	277.464	239.6
289.658	301.092	270.108	251.032
294.556	287.82	279.486	255.581
297.576	269.02	273.671	246.464
294.79	293.506	293.13	266.969
307.951	286.56	265.691	236.06
298.115	266.769	284.566	274.113
276.914	266.327	283.303	254.9
273.435	283.356	295.953	290.434
280.664	279.561	274.394	265.502
271.56	263.585	283.192	258.969
277.258	259.928	279.897	266.293
288.426	282.015	302.628	259.802
308.144	296.288	287.504	272.316
299.562	257.073	286.787	274.196
285.934	262.593	296.09	257.013
292.625	279.49	303.362	269.789
286.183	276.945	292.361	252.488
293.223	255.957	286.469	253.679
284.672	254.549	288.673	260.962
281.041	274.884	265.378	273.219
294.136	290.704	292.076	243.789
301.794	258.934	303.668	260.87
290.624	246.898	298.333	250.825
284.652	268.678	259.686	267.44
287.79	273.448	292.965	242.384
288.493	247.751	297.995	253.423
286.305	252.269	288.562	248.379
276.785	280.915	302.235	259.201
284.948	270.85	279.62	232.904
275.769	253.211	300.556	258.344
277.255	248.83	294.85	259.758
282.827	291.911	287.781	287.834
290.233	278.288	269.716	248.753
276.958	254.88	307.316	284.629
309.46	257.201	309.183	260.38
291.723	279.534	283.38	290.12
287.47	307.335	295.663	244.614
286.677	294.104	285.223	282.452
293.675	264.404	272.227	245.002
276.377	251.297	308.532	267.278
261.499	276.938	310.325	231.059
299.788	299.273	284.698	260.696
276.435	308	293.569	266.321
277.028	276.82	299.611	277.599
288.35	307.94	282.483	264.867
262.062	310.064	311.162	271.405
288.994	315.546	306.352	259.95
305.06	288.675	291.127	261.497
298.445	304.791	299.511	243.563
304.813	301.31	289.995	253.638
274.924	311.431	279.833	250.206
260.193	290.53	276.677	254.1
282.494	298.641	309.826	231.43
262.252	284.923	292.876	236.06
280.71	302.673	303.7	251.239
274.565	280.658	279.849	250.866
287.492	279.088	283.055	224.031
274.811	277.086	268.957	250.145
279.959	259.426	282.905	270.797
267.453	256.203	300.068	261.471
275.718	277.426	305.231	246.749
283.35	287.499	294.057	272.289
297.574	279.043	294.002	283.017
277.237	304.856	275.773	250.25
285.639	278.157	289.006	260.942
273.916	294.096	284.147	278.94
251.084	276.521	287.702	257.798
270.928	316.295	304.954	279.787
274.156	311.976	296.371	255.315
269.656	290.252	269.571	266.168
291.887	278.391	286.893	285.689
314.807	329.129	280.916	248.871
277.191	299.297	282.137	268.724
259.072	296.07	292.741	252.673
276.127	278.172	282.329	271.008
298.585	314.377	267.254	262.126
276.225	293.742	280.342	256.707
300.735	290.842	279.711	241.768
288.973	273.229	290.468	269.132
283.883	333.589	267.75	271.331
302.877	297.855	276.246	235.32
293.007	293.068	280.758	252.973
291.727	273.789	274.967	274.041
289.98	311.168	279.103	258.099
279.413	277.381	276.572	254.483
262.797	283.487	274.082	282.536
270.285	289.085	273.099	286.987
266.992	312.477	264.468	254.467
269.941	283.505	272.779	263.997
286.954	291.999	277.949	271.742
304.252	272.419	280.169	264.369
294.299	302.276	277.748	260.579
307.004	281.244	286.405	267.801
288.352	285.086	271.291	278.489
284.217	281.227	267.777	256.504
289.038	306.356	286.59	273.945
282.524	280.826	268.077	262.585
280.513	289.808	287.762	282.7
293.62	301.398	270.696	269.861
301.489	311.502	267.488	243.368
290.279	299.966	268.585	259.138
280.207	316.104	283.339	241.606
282.411	311.026	271.772	244.307
284.651	321.389	288.52	266.17
271.841	323.569	284.308	274.421
271.1	327.507	261.652	277.771
287.114	309.927	261.949	288.969
269.318	322.984	267.195	290.377
277.678	311.773	275.865	257.942
279.776	312.674	284.417	247.413
281.261	318.925	276.189	268.427
276.685	302.041	260.28	259.199
298.54	287.329	264.723	261.264
301.767	292.206	269.815	241.94
283.246	304.787	267.098	248.787
269.651	290.488	263.383	250.06
311.933	305.094	280.23	269.58
259.292	284.909	272.879	245.76
280.643	291.531	250.473	272.036
301.001	288.417	258.099	255.756
274.707	287.109	270.942	265.725
273.823	263.336	264.007	259.848
295.469	271.817	259.825	249.163
274.155	303.819	249.511	231.278
276.257	281.901	253.34	256.836
287.503	305.218	266.791	248.718
260.472	262.966	270.674	278.986
281.293	299.148	265.533	272.162
271.293	298.158	272.83	250.436
274.537	294.84	276.805	248.333
278.954	288.051	252.028	249.619
260.608	303.226	261.144	237.122
275.344	321.311	276.76	245.449
268.22	271.476	273.424	245.852
278.024	283.618	273.491	245.734
290.309	284.613	298.514	232.423
277.638	279.306	234.461	254.366
281.56	292.125	255.14	239.342
281.071	281.54	269.196	244.58
283.266	290.423	266.268	231.128
270.669	284.071	255.539	266.486
284.105	264.921	269.607	246.914
274.445	277.296	260.561	272.297
267.444	291.676	269.078	250.837
239.115	280.652	299.361	267.893
268.207	276.468	278.238	246.713
283.198	279.499	287.259	290.954
270.636	292.982	301.965	253.305
276.679	284.701	263.666	310.778
301.083	277.733	279.502	271.301
267.903	286.669	294.534	272.436
267.704	283.793	264.12	290.067
268.819	288.194	279.094	257.976
295.086	269.753	297.689	261.135
274.556	269.902	289.176	272.72
286.658	282.424	281.771	259.088
291.545	274.054	285.91	251.118
307.949	266.346	289.612	262.612
298.822	283.633	268.867	254.318
281.888	281.945	286.531	261.06
291.981	269.799	279.663	282.999
276.155	268.455	294.84	279.408
274.572	289.275	288.112	261.536
262.435	275.111	287.58	279.135
275.031	277.312	294.354	249.919
280.99		270.779	252.816
272.243		274.858	243.362
281.099		289.795	261.928
301.69		264.335	240.246
286.87		292.712	242.871
308.711		289.143	259.842
285.725		283.609	267.259
287.904		304.23	250.452
287.238		287.131	253.232
279.654		280.932	258.821
284.972		293.328	266.121
291.889		268.08	253.482
294.266		281.244	250.817
293.531		275.643	248.734
282.571		288.497	269.31
290.015		303.492	251.494
292.033		276.331	246.563
288.032		293.444	238.944
289.554		295.784	252.686
289.561		265.292	250.82
262.756		292.364	238.523
272.725		278.897	245.935
281.576		291.06	258.039
292.533		279.633	273.408
290.188		268.306	244.44
310.977		282.592	259.681
299.229		270.896	264.007
275.778		258.621	261.682
261.206		262.514	249.322
298.53		298.751	260.081
264.15		260.267	275.663
277.413		244.283	266.554
306.479		273.354	247.312
286.392		275.703	277.996
279.344		278.407	291.328
283.861		271.94	293.587
263.062		265.227	267.095
284.701		259.504	254.795
278.81		292.038	250.056
279.452		277.634	285.843
297.324		282.381	284.062
274.593		275.449	258.591
259.08		287.026	273.421
280.505		281.019	263.111
256.913		284.022	274.274
293.465		273.184	266.241
277.638		277.149	273.791
293.114		277.595	276.515
287.866		273.665	268.395
288.669		272.47	271.038
276.14		279.182	263.46
277.481		266.367	285.135
280.934		240.656	267.221
278.603		251.101	240.779
282.346		275.582	262.464
285.298		280.047	269.732
269.787		271.395	253.344
253.56		302.098	261.717
282.237		271.442	238
269.001		304.464	260.436
258.005		271.346	284.4
290.863		302.586	292.857
306.346		272.058	303.123
276.911		284.867	316.175
264.54		263.925	288.507
276.438		273.722	286.318
286.106		300.854	281.343
270.955		297.848	282.185
284.26		276.598	279.127
281.022		293.956	279.254
298.63		295.571	273.788
290.64		282.073	273.106
299.49		287.886	281.593
297.523		289.019	275.83
291.347		288.891	285.494
276.953		296.369	280.356
260.324		294.264	267.218
275.878		293.744	266.861
276.438		288.637	264.457
280.551		286.361	274.955
288.895		301.598	260.615
305.641		290.147	281.218
284.493		282.613	244.348
301.524		244.357	258.417
283.34		259.374	276.783
292.571		263.97	296.576
286.493		272.649	269.451
281.855		277.79	281.57
283.091		286.147	271.539
293.88		287.914	270.314
290.02		283.21	263.56
292.602		273.343	268.123
290.52		291.137	274.153
275.186		284.06	262.003
289.065		270.97	278.059
282.894		260.275	270.9
271.413		304.457	258.879
282.899		278.663	261.863
265.614		269.303	253.821
269.969		266.021	250.33
278.191		298.961	253.363
292.106		270.425	249.229
271.493		263.082	261.406
297.842		270.307	263.598
284.093		299.569	275.65
274.302		274.404	271.151
262.091		260.677	300.494
290.359		270.574	282.541
259.71		286.171	306.434
267.651		261.441	300.245
299.759		260.075	272.109
281.79		246.09	301.301
279.425		263.886	308.936
278.324		246.25	270.034
261.847		246.367	285.606
279.194		269.758	305.341
286		291.916	268.371
259.837		259.414	295.006
291.843		259.668	290.924
272.204		264.712	265.968
259.706		297.01	255.303
277.199		254.578	286.414
280.831		242.053	278.74
289.427		240.18	255.577
269.276		262.636	262.956
275.957		246.832	285.599
276.49		231.963	306.954
284.064		263.272	263.768
269.46		283.9	258.98
281.845		244.814	272.564
285.872		248.796	293.861
268.004		258.477	265.8
260.302		283.714	268.336
283.48		243.445	290.785
277.322		251.061	310.11
263.439		268.269	285.043
268.368		275.593	240.94
280.254		250.913	263.555
269.334		248.605	280.459
289.997		261.783	259.63
321.755		272.329	249.687
276.222		250.328	272.764
268.546		246.313	296.651
268.014		259.508	266.839
288.529		281.642	252.448
262.166		253.058	280.206
286.496		242.709	272.029
275.027		260.161	264.081
294.707		266.836	256.172
292.958		251.636	265.868
293.456		236.311	268.238
287.276		257.894	262.561
296.938		273.118	266.921
291.623		245.564	279.91
264.289		243.213	280.458
269.922		263.148	265.398
275.164		277.61	273.003
276.281		246.201	269.781
269.219		239.973	268.842
299.194		263.221	264.8
274.188		276.417	258.638
285.323		250.294	261.051
288.517		240.777	276.108
282.675		278.52	251.702
291.872		287.779	254.847
287.065		255.538	271.346
294.205		251.116	275.799
284.878		252.069	256.503
289.12		273.928	278.988
285.314		263.663	278.962
286.392		259.002	290.35
276.254		270.451	260.179
287.458		290.917	274.949
278.008		278.208	287.19
288.238		261.862	310.62
284.208		274.372	270.646
267.855		291.891	277.509
271.143		277.767	295.492
272.414		272.053	323.52
277.931		286.152	282.786
271.197		305.945	270.956
299.996		286.125	287.468
287.165		272.676	311.384
273.275		302.49	284.258
257.599		316.69	286.67
297.715		290.481	298.107
271.724		266.126	296.443
273.635		268.615	291.256
304.099		272.793	285.593
277.511		259.411	270.902
277.883		272.615	267.369
284.434		296.585	293.147
257.057		263.022	283.249
280.001		263.752	300.234
285.321		242.59	302.814
270.21		293.924	290.075
292.02		298.556	285.506
265.891		306.395	251.382
263.832		305.485	251.45
278.397		303.13	244.355
253.931		308.19	247.35
271.868		310.802	283.193
272.608		290.985	254.584
285.883		282.689	285.347
277.519		296.543	268.55
273.176		279.322	266.867
272.83		300.295	265.142
280.182		283.704	267.789
282.65		291.483	276.097
275.163		291.284	258.45
260.486		292.843	247.775
269.925		289.081	253.539
272.884		297.379	245.031
254.339		278.657	254.532
255.552		279.939	255.062
295.152		283.518	251.91
269.523		275.744	250.293
282.561		276.042	255.056
310.404		273.137	242.243
284.36		277.604	270.211
259.632		264.499	264.856
269.839		273.107	270.944
290.89		275.668	260.752
274.586		277.735	272.788
280.741		265.388	264.593
271.272		262.45	263.088
284.374		270.918	249.67
282.323		272.103	269.046
282.346		258.327	259.751
299.185		251.148	280.944
282.573		257.12	265.594
276.373		257.408	289.483
260.446		257.107	271.706
273.072		253.128	299.195
278.136		257.397	284.769
270.909		258.231	243.747
282.663		256.756	245.927
302.488		260.78	243.117
276.498		260.364	248.176
292.45		262.148	254.044
290.727		256.858	280.397
291.679		258.537	256.769
277.74		261.523	260.627
276.366		257.923	251.123
277.815		271.328	279.951
284.058		261.547	240.414
278.041		279.206	248.15
284.485		257.54	244.1
285.149		283.811	257.07
271		266.541	237.295
287.488		311.836	233.05
268.546		276.009	246.617
274.733		301.155	272.452
273.454		276.883	247.454
272.105		283.021	248.223
276.601		266.718	257.556
271.843		281.662	278.863
266.709		260.904	255.963
270.335		256.781	254.677
290.73		258.453	246.081
278.383		284.618	259.5
268.09		270.546	247.979
259.22		269.541	242.122
296.993		266.948	233.39
263.016		284.882	243.996
286.032		273.56	222.437
299.809		271.808	223.993
281.496		268.777	243.304
271.399		276.412	265.758
281.388		258.56	241.353
251.654		275.671	238.008
283.054		281.143	248.31
285.138		270.596	270.555
260.399		255.741	253.933
283.215		283.22	253.97
265.131		291.557	240.436
264.77		263.005	251.43
277		260.825	242.608
270.331		274.218	231.681
283.81		288.507	242.734
283.293		274.732	258.795
276.372		252.461	243.38
263.744		270.955	235.936
280.835		284.933	242.093
275.118		271.951	266.906
267.807		256.734	252.416
281.509		251.495	255.055
261.964		277.24	237.531
254.751		261.924	259.243
267.54		257.936	254.74
257.154		259.2	264.527
265.709		283.947	238.116
258.158		274.409	273.123
278.06		255.067	276.818
269.491		257.828	286.337
288.466		285.235	263.322
325.525		262.926	276.667
273.169		251.712	280.382
261.042		254.613	260.569
244.102		282.197	258.84
279.432		268.635	253.844
264.102		254.64	265.533
281.207		254.996	271.566
266.348		277.986	252.249
293.768		275.993	245.415
283.92		244.632	277.474
277.132		253.614	294.671
284.981		284.941	252.506
282.343		266.863	248.655
282.461		253.66	264.414
255.822		260.659	266.631
281.052		278.191	266.448
286.133		265.534	268.252
271.674		246.117	250.738
276.371		259.559	231.024
298.171		284.683	237.297
260.799		263.65	231.437
298.115		252.713	271.915
290.175		257.903	267.896
291.27		270.064	285.743
285.603		257.643	260.554
281.239		253.601	246.335
273.235		266.602	259.347
279.224		282.458	265.458
290.089		258.345	262.501
285.991		257.649
287.833		272.045
287.83		270.403
283.359		258.491
268.944		255.729
281.657		262.987
260.891		268.832
261.714		250.065
266.489		268.148
283.4		265.598
270.31		268.076
279.319		247.304
286.834		279.829
284.935		255.259
271.429		267.27
266.561		259.411
290.431		288.857
258.065		260.687
283.122		278.55
298.07		255.978
279.732		299.452
278.039		268.631
279.364		287.492
260.557		259.974
291.581		298.589
273.266		273.06
258.71		292.324
285.286		265.285
270.952		316.189
260.907		278.516
278.154		310.945
268.346		272.303
283.628		308.685
278.68		289.407
293.986		317.412
269.351		287.334
270.222		272.096
267.805		305.477
275.111		277.676
270.789		297.074
261.732		281.482
253.71		281.845
278.873		276.202
275.622		310.924
277.373		288.748
264.666		291.868
294.218		271.192
261.366		278.262
268.501		262.305
304.821		266.483
269.812		294.093
264.109		271.61
251.878		266.89
280.161		296.766
266.789		282.82
293.046		283.958
271.687		262.978
289.039
280.52
283.721
292.069
284.923
273.345
266.841
280.677
287.794
285.539
281.739
281.201
263.491
293.115
287.709
283.639
287.461
278.457
284.143
274.32
284.143
273.317
270.14
270.715
272.602
256.33
296.858
264.863
261.929
268.427
274.451
269.026
263.689
297.908
276.079
261.347
254.717
292.511
261.508
281.842
297.771
286.47
280.521
275.612
253.61
297.269
287.386
269.802
288.388
268.702
257.508
268.086
263.572
277.092
278.512
275.998
279.146
277.702
270.201
262.335
272.336
274.376
271.44
273.032
270.753
253.264
254.82
281.51
262.046
272.408
291.258
254.159
253.658
244.938
278.91
273.072
294.12
283.603
289.377
282.809
274.754
289.615
266.741
275.185
273.492
269.154
273.367
274.132
268.563
299.972
281.646
296.331
292.242
282.392
279.807
271.635
269.031
259.559
283.402
273.611
264.786
280.6
280.695
264.785
271.962
264.782
257.664
263.461
267.561
275.888
267.933
299.139
272.258
274.45
258.272
306.072
267.013
279.343
300.718
273.345
279.777
280.805
258.894
290.928
295.667
267.505
304.948
264.769
251.87
274.966
265.015
274.099
272.414
278.836
274.818
268.877
259.579
261.198
257.75
294.12
273.395
271.183
272.569
275.539
279.693
275.447
262.156
274.279
308.124
252.181
250.215
244.183
279.076
273.925
285.159
278.807
279.454
287.37
277.921
286.596
278.901
270.35
264.572
275.467
269.544
270.873
270.222
279.624
276.794
296.565
286.077
269.394
277.909
262.531
271.694
267.05
282.4
280.109
267.78
288.376
296.272
271.724
274.998
274.185
256.469
267.299
267.182
272.839
264.805
291.867
278.319
273.091
250.187
294.241
258.712
276.721
285.969
277.39
271.37
278.281
249.158
275.741
282.973
260.986
291.246
262.449
253.569
270.231
253.451
279.563
271.455
280.678
259.923
265.868
260.492
267.754
258.373
255.933
256.305
274.494
275.485
270.595
254.079
265.267
264.205
277.265
312.235
258.304
260.467
248.65
274.992
268.284
270.205
259.748
277.321
286.07
279.078
285.748
280.845
264.569
261.752
266.331
268.44
277.355
269.524
273.366
274.129
296.458
278.933
282.697
279.93
275.389
280.024
266.168
289.759
280.182
266.958
286.742
287.675
269.191
290.757
262.827
255.718
265.941
267.724
260.142
260.135
296.855
274.03
258.321
253.994
292.585
248.833
275.605
297.636
280.123
285.574
268.459
267.925
280.005
304.758
271.283
289.238
255.207
243.498
273.925
257.705
281.091
274.002
277.213
266.948
277.82
258.464
275.221
279.838
292.619
272.471
259.412
257.932
274.142
260.292
277.188
265.859
261.365
293.004
248.338
265.458
242.587
282.467
268.485
279.425
267.693
287.335
284.446
284.384
267.727
295.403
267.181
263.011
260.604
266.607
271.504
278.493
299.159
272.439
285.809
269.653
282.113
289.64
292.001
267.167
280.03
279.552
291.223
262.434
277.773
300.7
263.599
282.365
268.684
255.364
269.655
274.995
274.272
262.362
283.655
280.04
260.619
256.625
290.057
261.397
272.599
303.144
271.592
289.358
268.17
274.527
278.576
307.093
260.855
283.544
258.22
254.326
264.392
254.259
293.41
269.009
266.169
263.742
266.245
243.008
242.615
262.814
297.107
259.391
272.07
253.646
254.474
260.677
256.745
256.72
276.629
296.75
239.824
249.852
245.704
295.357
271.07
276.509
261.978
286.457
288.983
271.999
274.993
300.067
261.098
265.163
263.093
275.561
289.68
273.812
284.539
292.486
292.666
280.335
293.08
304.753
288.874
276.051
277.55
273.289
290.554
260.621
273.494
286.043
266.749
270.991
266.514
255.362
280.608
279.059
275.086
265.059
290.911
284.831
264.365
264.845
285.28
261.669
257.216
296.113
263.537
276.959
264.147
281.815
270.408
298.067
251.645
271.52
270.609
257.246
268.294
257.887
306.692
261.83
268.151
268.049
265.247
254.226
265.57
294.283
288.566
262.176
268.681
255.405
267.879
259.188
274.53
272.397
275.538
298.786
247.236
259.968
260.426
291.54
271.245
273.356
264.727
287.729
296.498
276.092
274.988
313.474
261.859
264.297
266.262
279.124
270.683
276.662
287.085
285.688
304.18
277.604
309.76
318.298
288.155
265.861
263.899
273.604
290.068
261.522
271.037
312.216
266.109
272.856
275.901
267.293
274.492
268.801
285.591
251.336
289.983
294.542
265.5
266.012
278.064
259.088
262.34
301.736
260.09
298.718
269.393
288.971
268.728
292.998
253.665
284.586
259.25
249.58
272.099
257.527
300.087
261.191
271.534
248.656
267.897
264.674
259.625
290.99
304.547
264.447
261.601
251.879
280.966
269.607
275.803
287.672
274.154
286.039
257.146
269.637
260.604
303.266
273.229
280.943
269.872
271.631
287.732
287.293
286.054
305.068
269.194
268.172
248.904
294.204
283.173
274.216
291.848
275.325
314.428
290.15
313.165
319.228
291.115
267.301
271.658
278.358
303.147
263.024
280.251
322.1
269.1
279.603
286.347
276.12
267.986
279.244
284.144
265.007
285.551
282.178
256.698
267.768
278.393
267.399
262.542
298.052
265.265
300.731
284.937
294.058
278.194
286.245
263.036
287.159
250.401
249.907
258.682
257.838
298.28
277.405
272.823
259.029
264.439
277.49
259.375
283.002
320.887
264.696
269.04
266.485
258.909
263.263
268.133
286.078
286.688
288.604
262.472
268.026
270.833
306.266
271.81
275.22
260.397
280.052
287.881
265.246
291.007
312.184
278.665
275.415
261.635
276.636
286.635
294.892
298.544
281.336
321.323
304.531
305.953
317.255
306.115
271.356
269.935
278.497
313.528
266.759
289.326
333.943
268.951
277.137
290.979
280.531
295.379
278.878
285.559
266.636
280.872
276.671
254.792
264.233
287.904
263.941
275.014
302.895
266.653
317.828
288.044
283.687
293.99
295.647
252.364
278.211
269.141
258.544
277.589
250.377
316.925
274.131
271.691
256.366
272.995
280.749
260.756
293.062
340.116
267.419
277.778
268.942
259.382
255.235
263.533
281.076
306.085
306.889
269.405
267.669
282.76
308.509
277.762
261.676
260.492
292.316
303.737
263.945
288.948
261.609
259.709
256.638
294.412
297.234
306.98
291.923
269.974
322.527
299.831
311.916
308.057
266.584
267.306
289.664
309.628
281.672
290.148
324.809
268.92
284.003
282.471
286.974
285.989
271.61
291.443
260.102
280.136
274.025
254.173
277.228
286.321
260.593
283.913
311.795
281.837
302.003
286.939
297.307
304.648
267.266
310.089
264.229
253.279
272.417
257.48
303.247
278.993
286.1
252.126
279.656
284.703
254.259
283.381
334.537
265.942
270.258
276.303
275.142
253.138
269.063
292.413
311.016
308.65
280.157
277.865
291.91
270.097
275.805
269.138
314.145
306.952
268.203
299.749
266.475
269.242
257.54
288.718
300.489
314.516
281.175
268.72
324.95
313.796
323.722
315.915
267.054
273.256
302.87
321.618
301.054
287.524
272.906
265.562
298.406
294.527
304.918
274.746
297.256
273.232
275.432
251.787
252.88
287.111
293.106
254.144
289.907
318.423
286.9
299.01
303.121
286.387
284.584
263.701
283.859
289.069
261.464
271.649
251.209
288.029
303.648
264.676
290.956
296.557
264.636
287.698
323.101
269.228
280.79
278.834
278.407
249.516
265.615
294.552
307.854
312.836
[truncated: 346 more rows]
