# Supplementary material for: Variations of intracellular density during the cell cycle arise from tip-growth regulation in fission yeast
Source: eLife. 2021 Jun 8;10:e64901. doi: 10.7554/eLife.64901 (PMC8221806; doi:10.7554/eLife.64901)
Supplement: Figure 1—source data 1. [file elife-64901-fig1-data1.xlsx]

## Sheet: Fig1B_BSA_calibration
BSA (mg/ml)	retrieved radians
0	8.19693
0	7.51917
0	7.61802
0	7.78289
0	7.55497
0	7.78449
0	8.82363
0	8.37604
0	7.58517
0	7.59602
0	7.39586
0	7.09612
0	7.36662
0	7.66481
0	7.73366
0	7.69891
0	8.2821
0	8.16218
0	7.76801
0	8.93121
0	8.59401
0	8.25598
0	8.87062
0	7.93336
0	8.74486
0	8.0002
0	8.23137
0	7.88029
0	7.46847
0	7.67444
0	7.90659
0	7.904
0	8.28683
0	8.35728
0	7.54291
0	7.51619
0	7.93583
0	8.03557
200	8.73662
200	7.68266
200	8.14768
200	8.55017
200	2.96817
200	2.4236
200	2.69814
200	2.86243
200	2.52585
200	2.13838
200	2.49541
200	2.59132
200	2.01718
200	2.56717
200	2.91545
200	2.67807
200	2.66335
200	2.39299
200	2.21291
200	1.97228
200	2.18581
200	2.28457
200	2.0386
200	2.28606
200	2.47714
200	2.68838
200	2.30725
200	3.02323
200	2.88514
200	2.6795
200	2.73246
200	2.42031
200	2.77061
200	2.36016
200	2.3678
200	2.18654
200	2.12967
200	2.10564
200	2.48187
200	2.6102
200	2.40801
200	2.67767
200	2.30805
200	2.48134
150	2.43989
150	2.61972
150	2.57853
150	3.0041
150	4.03672
150	3.49886
150	3.86922
150	3.70355
150	3.39904
150	4.09614
150	3.44677
150	3.5927
150	3.43053
150	3.21915
150	3.73967
150	3.5681
150	4.12623
150	4.07061
150	3.58935
150	3.71127
150	3.42713
150	3.45221
150	3.1211
150	3.32134
150	3.3071
150	3.26518
150	3.61276
150	3.91685
150	3.75021
150	4.31902
150	4.18374
150	3.48154
150	4.09311
150	3.55244
150	3.87164
150	3.53142
150	3.53507
150	3.36259
150	3.41173
150	3.53112
150	3.71048
150	3.84603
150	3.88405
150	3.84905
150	4.08575
150	3.28463
100	3.36169
100	3.50923
100	3.26328
100	3.52172
100	4.83397
100	5.03758
100	5.18152
100	5.29699
100	4.5635
100	4.22912
100	5.54162
100	4.83868
100	4.78881
100	4.85631
100	4.63166
100	5.01144
100	4.64367
100	5.60356
100	5.14363
100	4.73892
100	4.76809
100	4.69624
100	4.52283
100	4.70552
100	4.82554
100	4.7963
100	4.6754
100	5.45585
100	5.07771
100	5.40954
100	4.72191
100	5.40374
100	4.77214
100	4.96282
100	5.1934
100	4.90542
100	5.22405
100	5.46639
100	4.95777
100	4.70103
100	4.9178
100	4.86711
100	5.2607
100	4.87272
100	4.6233
100	4.90488
100	4.51756
100	4.74641
50	4.98514
50	4.9923
50	5.10168
50	5.1266
50	6.68204
50	6.2168
50	6.16574
50	6.19432
50	6.07405
50	6.15338
50	6.1598
50	6.66671
50	6.74249
50	6.55264
50	6.38511
50	6.23255
50	6.09504
50	5.62395
50	6.06839
50	6.28237
50	6.51494
50	6.2199
50	6.78449
50	6.22609
50	7.04113
50	6.11983
50	6.75165
50	6.27388
50	6.07142
50	6.12064
50	5.95412
50	6.4324
50	6.847
50	6.25047
50	6.47797
50	6.36393
50	6.47986
50	6.35425
50	6.7844
50	6.59885
50	6.49093
50	6.69199
50	6.53365
50	5.98254
50	6.42607
50	6.01397
50	6.27298
50	6.02533
50	5.97836
50	6.07469
0	6.36406
0	6.73604
0	6.05567
0	6.02222
0	7.83537
0	8.03996
0	8.41866
0	7.91857
0	7.5307
0	7.69704
0	7.49549
0	7.81968
0	7.86935
0	8.34171
0	7.67108
0	8.02896
0	7.52112
0	7.29024
0	7.62911
0	7.95963
0	8.01502
0	7.89202
0	8.32524
0	8.03421
0	8.14122
0	7.78487
0	8.61634
0	7.77991
0	8.05594
0	8.45272
0	7.81298
0	7.75464
0	8.11357
0	7.59942
0	7.23828
0	7.82559
0	7.70282
0	7.88912
0	8.08523
0	7.58301
0	7.86854
0	7.78694
0	7.31564
0	8.08965
0	7.61675
0	8.15076
0	7.75775
0	7.86511
0	7.64844
0	7.71261
0	8.03473
	7.66837
	7.66835
	8.09146
	7.26079
