# Supplementary material for: Variations of intracellular density during the cell cycle arise from tip-growth regulation in fission yeast
Source: eLife. 2021 Jun 8;10:e64901. doi: 10.7554/eLife.64901 (PMC8221806; doi:10.7554/eLife.64901)
Supplement: Figure 1—source data 2. [file elife-64901-fig1-data2.xlsx]

## Sheet: Fig1C_Histogram_density
Density (mg/ml)
239.115
239.824
240.634
242.14
242.587
242.615
243.008
243.498
244.102
244.183
244.627
244.938
245.704
247.236
247.515
248.338
248.65
248.656
248.833
248.904
249.158
249.516
249.58
249.852
249.907
250.045
250.187
250.215
250.377
250.401
251.084
251.209
251.336
251.645
251.654
251.787
251.87
251.878
251.879
252.126
252.181
252.364
252.88
253.138
253.264
253.279
253.451
253.56
253.569
253.61
253.646
253.658
253.665
253.71
253.889
253.931
253.994
254.079
254.144
254.159
254.173
254.226
254.259
254.259
254.326
254.339
254.474
254.717
254.751
254.792
254.82
255.207
255.235
255.347
255.362
255.364
255.388
255.405
255.524
255.552
255.718
255.76
255.822
255.907
255.933
256.305
256.33
256.366
256.397
256.469
256.625
256.638
256.698
256.72
256.745
256.913
257.027
257.057
257.146
257.154
257.216
257.246
257.389
257.43
257.48
257.508
257.527
257.54
257.599
257.664
257.705
257.75
257.838
257.887
257.932
258.005
258.065
258.158
258.189
258.22
258.272
258.304
258.321
258.373
258.464
258.544
258.682
258.702
258.71
258.712
258.769
258.894
258.909
259.029
259.072
259.08
259.088
259.188
259.219
259.22
259.25
259.292
259.375
259.382
259.391
259.412
259.555
259.559
259.579
259.625
259.632
259.706
259.709
259.71
259.748
259.837
259.923
259.968
260.027
260.09
260.102
260.132
260.135
260.142
260.193
260.292
260.302
260.324
260.397
260.399
260.426
260.446
260.467
260.472
260.475
260.486
260.492
260.492
260.527
260.557
260.593
260.604
260.604
260.608
260.619
260.621
260.677
260.756
260.799
260.855
260.891
260.907
260.956
260.986
260.996
261.042
261.077
261.098
261.191
261.191
261.198
261.206
261.313
261.347
261.365
261.366
261.397
261.464
261.499
261.508
261.522
261.601
261.609
261.635
261.669
261.676
261.693
261.714
261.732
261.752
261.83
261.847
261.859
261.929
261.931
261.964
261.978
262.046
262.062
262.091
262.156
262.166
262.176
262.243
262.252
262.331
262.335
262.34
262.362
262.395
262.434
262.435
262.449
262.467
262.472
262.481
262.485
262.531
262.542
262.651
262.756
262.797
262.814
262.827
263.011
263.016
263.024
263.036
263.054
263.062
263.093
263.237
263.263
263.287
263.376
263.439
263.45
263.461
263.491
263.502
263.533
263.537
263.572
263.599
263.689
263.701
263.742
263.744
263.749
263.832
263.899
263.941
263.945
264.102
264.109
264.147
264.15
264.205
264.229
264.233
264.289
264.297
264.313
264.324
264.365
264.392
264.439
264.447
264.54
264.569
264.572
264.636
264.654
264.666
264.674
264.676
264.696
264.727
264.769
264.77
264.782
264.785
264.786
264.805
264.813
264.845
264.847
264.863
264.904
264.967
264.98
265.007
265.015
265.059
265.131
265.163
265.174
265.224
265.246
265.247
265.251
265.265
265.267
265.299
265.324
265.403
265.435
265.458
265.5
265.502
265.562
265.57
265.614
265.615
265.662
265.709
265.815
265.859
265.861
265.866
265.868
265.891
265.916
265.941
265.942
266.012
266.109
266.168
266.169
266.245
266.262
266.317
266.331
266.342
266.348
266.475
266.485
266.489
266.514
266.561
266.584
266.607
266.636
266.653
266.709
266.741
266.749
266.759
266.789
266.841
266.861
266.948
266.958
266.992
267.013
267.05
267.054
267.157
267.167
267.181
267.182
267.266
267.293
267.299
267.299
267.301
267.306
267.356
267.399
267.419
267.444
267.453
267.505
267.54
267.561
267.651
267.669
267.693
267.704
267.724
267.727
267.728
267.754
267.768
267.78
267.784
267.805
267.807
267.847
267.855
267.879
267.882
267.897
267.903
267.925
267.933
267.986
268.004
268.014
268.026
268.049
268.086
268.09
268.133
268.151
268.159
268.17
268.172
268.203
268.207
268.22
268.221
268.235
268.284
268.294
268.311
268.346
268.368
268.396
268.427
268.44
268.459
268.462
268.485
268.501
268.546
268.546
268.558
268.563
268.617
268.676
268.681
268.684
268.702
268.72
268.728
268.801
268.819
268.837
268.877
268.915
268.92
268.942
268.944
268.947
268.948
268.951
269.001
269.009
269.026
269.031
269.04
269.052
269.063
269.1
269.104
269.137
269.138
269.141
269.154
269.191
269.194
269.219
269.228
269.242
269.276
269.291
269.318
269.334
269.351
269.393
269.394
269.405
269.46
269.491
269.523
269.524
269.541
269.544
269.607
269.637
269.651
269.653
269.655
269.656
269.787
269.802
269.812
269.823
269.839
269.84
269.872
269.884
269.922
269.922
269.925
269.935
269.941
269.969
269.974
269.983
270.028
270.037
270.063
270.097
270.14
270.201
270.205
270.21
270.222
270.222
270.231
270.258
270.285
270.31
270.331
270.335
270.35
270.38
270.408
270.434
270.539
270.561
270.595
270.609
270.636
270.669
270.683
270.715
270.732
270.753
270.759
270.789
270.83
270.833
270.873
270.887
270.909
270.928
270.952
270.955
270.991
271
271.037
271.07
271.1
271.139
271.143
271.183
271.197
271.23
271.245
271.272
271.283
271.293
271.356
271.37
271.399
271.4
271.413
271.429
271.44
271.455
271.493
271.504
271.52
271.534
271.555
271.56
271.592
271.61
271.616
271.631
271.635
271.649
271.658
271.674
271.687
271.691
271.692
271.694
271.704
271.719
271.724
271.724
271.724
271.81
271.841
271.843
271.868
271.962
271.999
272.038
272.064
272.07
272.083
272.099
272.105
272.204
272.231
272.243
272.243
272.258
272.291
272.336
272.376
272.397
272.397
272.408
272.414
272.414
272.417
272.439
272.446
272.471
272.498
272.503
272.529
272.552
272.569
272.599
272.602
272.608
272.627
272.65
272.673
272.703
272.725
272.823
272.83
272.831
272.839
272.856
272.884
272.906
272.927
272.995
273.032
273.072
273.072
273.091
273.099
273.154
273.169
273.176
273.191
273.209
273.229
273.232
273.235
273.256
273.266
273.275
273.289
273.3
273.317
273.345
273.345
273.356
273.366
273.367
273.379
273.395
273.412
273.435
273.454
273.492
273.494
273.604
273.611
273.621
273.628
273.635
273.638
273.749
273.782
273.806
273.812
273.823
273.859
273.897
273.916
273.921
273.922
273.925
273.925
273.956
273.986
274.002
274.024
274.025
274.03
274.084
274.099
274.129
274.131
274.132
274.142
274.154
274.155
274.156
274.158
274.185
274.188
274.21
274.216
274.272
274.279
274.291
274.295
274.302
274.31
274.32
274.376
274.399
274.445
274.45
274.451
274.489
274.492
274.494
274.527
274.53
274.531
274.537
274.55
274.556
274.565
274.572
274.586
274.593
274.61
274.615
274.631
274.641
274.707
274.733
274.746
274.754
274.763
274.801
274.811
274.818
274.87
274.924
274.937
274.966
274.988
274.992
274.993
274.995
274.998
275.014
275.027
275.031
275.033
275.086
275.111
275.118
275.142
275.163
275.164
275.185
275.186
275.189
275.22
275.221
275.308
275.325
275.344
275.384
275.389
275.392
275.415
275.432
275.447
275.449
275.467
275.485
275.536
275.538
275.539
275.561
275.573
275.605
275.612
275.622
275.718
275.741
275.769
275.778
275.803
275.804
275.805
275.808
275.822
275.836
275.858
275.878
275.888
275.901
275.906
275.957
275.998
276.02
276.051
276.079
276.092
276.12
276.127
276.14
276.155
276.169
276.222
276.225
276.245
276.252
276.254
276.257
276.281
276.284
276.286
276.303
276.338
276.345
276.366
276.371
276.372
276.373
276.373
276.377
276.392
276.435
276.438
276.438
276.49
276.498
276.509
276.513
276.569
276.601
276.629
276.636
276.659
276.662
276.671
276.679
276.685
276.721
276.75
276.755
276.784
276.785
276.794
276.799
276.89
276.911
276.914
276.919
276.953
276.953
276.958
276.959
276.99
277
277.011
277.028
277.057
277.085
277.092
277.123
277.132
277.137
277.179
277.188
277.191
277.199
277.213
277.218
277.224
277.228
277.237
277.255
277.258
277.265
277.317
277.321
277.322
277.355
277.373
277.39
277.405
277.407
277.412
277.413
277.43
277.481
277.49
277.511
277.515
277.519
277.55
277.589
277.604
277.638
277.638
277.658
277.678
277.702
277.739
277.74
277.762
277.773
277.778
277.782
277.815
277.82
277.848
277.865
277.883
277.908
277.909
277.921
277.929
277.931
277.966
278.003
278.008
278.024
278.039
278.041
278.06
278.062
278.064
278.074
278.136
278.154
278.171
278.171
278.181
278.191
278.194
278.209
278.211
278.281
278.319
278.324
278.326
278.329
278.358
278.376
278.383
278.393
278.397
278.405
278.407
278.411
278.43
278.457
278.493
278.493
278.495
278.497
278.501
278.512
278.576
278.594
278.603
278.626
278.64
278.656
278.665
278.68
278.76
278.807
278.81
278.82
278.834
278.836
278.861
278.873
278.878
278.888
278.896
278.901
278.91
278.911
278.926
278.933
278.954
278.993
279
279.05
279.059
279.076
279.078
279.124
279.146
279.146
279.181
279.194
279.224
279.244
279.254
279.319
279.323
279.343
279.344
279.364
279.413
279.425
279.425
279.432
279.436
279.452
279.454
279.51
279.525
279.541
279.548
279.552
279.555
279.563
279.603
279.604
279.624
279.628
279.654
279.656
279.677
279.693
279.701
279.712
279.721
279.732
279.751
279.776
279.777
279.807
279.82
279.838
279.853
279.879
279.883
279.93
279.954
279.959
279.963
279.975
280
280.001
280.005
280.024
280.03
280.04
280.052
280.09
280.098
280.109
280.117
280.123
280.136
280.157
280.161
280.182
280.182
280.19
280.207
280.214
280.233
280.234
280.251
280.254
280.277
280.33
280.335
280.412
280.505
280.513
280.52
280.521
280.531
280.532
280.545
280.551
280.6
280.608
280.633
280.643
280.664
280.665
280.677
280.678
280.695
280.71
280.737
280.741
280.749
280.79
280.803
280.805
280.825
280.831
280.835
280.845
280.862
280.872
280.89
280.934
280.943
280.966
280.988
280.99
281.022
281.041
281.052
281.068
281.071
281.076
281.091
281.099
281.144
281.16
281.175
281.201
281.206
281.207
281.239
281.261
281.293
281.295
281.307
281.336
281.388
281.4
281.416
281.496
281.509
281.51
281.551
281.56
281.561
281.576
281.59
281.643
281.646
281.657
281.672
281.739
281.772
281.784
281.79
281.814
281.815
281.837
281.842
281.845
281.845
281.855
281.888
281.93
282.004
282.033
282.113
282.149
282.15
282.16
282.178
282.212
282.237
282.27
282.323
282.327
282.343
282.346
282.346
282.351
282.365
282.369
282.392
282.4
282.411
282.461
282.467
282.471
282.482
282.494
282.524
282.559
282.561
282.562
282.571
282.573
282.592
282.609
282.65
282.663
282.675
282.697
282.716
282.724
282.731
282.751
282.76
282.766
282.788
282.794
282.805
282.809
282.827
282.876
282.88
282.894
282.899
282.938
282.964
282.973
283.002
283.006
283.009
283.054
283.06
283.091
283.122
283.135
283.173
283.198
283.215
283.242
283.246
283.266
283.293
283.297
283.313
283.34
283.35
283.359
283.381
283.4
283.402
283.46
283.48
283.544
283.56
283.561
283.6
283.603
283.611
283.628
283.639
283.655
283.681
283.687
283.692
283.71
283.721
283.75
283.787
283.81
283.859
283.861
283.871
283.883
283.912
283.913
283.92
283.942
284.003
284.058
284.064
284.093
284.105
284.143
284.143
284.144
284.159
284.18
284.208
284.217
284.26
284.313
284.345
284.36
284.374
284.379
284.384
284.396
284.434
284.446
284.447
284.469
284.485
284.493
284.506
284.509
284.539
284.584
284.586
284.611
284.616
284.646
284.647
284.651
284.652
284.663
284.672
284.701
284.703
284.715
284.786
284.831
284.854
284.865
284.878
284.923
284.935
284.937
284.948
284.972
284.979
284.981
285.138
285.149
285.15
285.159
285.228
285.28
285.286
285.292
285.298
285.314
285.319
285.321
285.323
285.379
285.539
285.544
285.551
285.558
285.559
285.563
285.574
285.591
285.592
285.603
285.622
285.623
285.639
285.688
285.725
285.728
285.748
285.756
285.806
285.809
285.826
285.857
285.872
285.874
285.883
285.907
285.934
285.943
285.969
285.989
285.991
286
286.007
286.019
286.032
286.039
286.043
286.054
286.07
286.077
286.078
286.1
286.106
286.133
286.183
286.197
286.213
286.214
286.215
286.222
286.238
286.245
286.298
286.305
286.321
286.347
286.351
286.368
286.384
286.387
286.392
286.392
286.395
286.413
286.457
286.47
286.493
286.496
286.518
286.554
286.596
286.635
286.641
286.658
286.677
286.682
286.688
286.71
286.714
286.716
286.742
286.834
286.842
286.868
286.87
286.9
286.904
286.939
286.954
286.974
287.037
287.065
287.065
287.079
287.085
287.111
287.114
287.124
287.142
287.159
287.165
287.191
287.231
287.238
287.263
287.267
287.276
287.293
287.326
287.335
287.37
287.386
287.429
287.458
287.461
287.47
287.488
287.492
287.503
287.524
287.532
287.576
287.6
287.653
287.663
287.672
287.675
287.698
287.699
287.7
287.709
287.729
287.732
287.763
287.79
287.794
287.83
287.833
287.84
287.866
287.881
287.904
287.904
287.958
287.958
288.029
288.032
288.044
288.045
288.155
288.179
288.192
288.215
288.238
288.279
288.292
288.33
288.35
288.352
288.376
288.388
288.398
288.426
288.458
288.466
288.493
288.494
288.517
288.529
288.54
288.551
288.566
288.604
288.608
288.62
288.621
288.669
288.718
288.765
288.77
288.874
288.895
288.899
288.931
288.948
288.964
288.971
288.973
288.983
288.994
289.013
289.038
289.039
289.054
289.065
289.069
289.077
289.12
289.137
289.157
289.16
289.238
289.265
289.309
289.326
289.337
289.338
289.34
289.358
289.377
289.382
289.389
289.417
289.427
289.439
289.549
289.55
289.554
289.555
289.561
289.587
289.595
289.615
289.64
289.658
289.664
289.68
289.685
289.706
289.759
289.768
289.795
289.834
289.85
289.907
289.915
289.919
289.98
289.983
289.992
289.997
290.012
290.015
290.02
290.057
290.061
290.063
290.068
290.072
290.088
290.089
290.105
290.116
290.116
290.148
290.15
290.175
290.188
290.232
290.232
290.233
290.249
290.279
290.309
290.359
290.389
290.431
290.434
290.48
290.497
290.52
290.52
290.523
290.53
290.554
290.582
290.584
290.624
290.636
290.64
290.663
290.669
290.727
290.73
290.751
290.757
290.788
290.805
290.863
290.89
290.91
290.911
290.919
290.928
290.956
290.979
290.99
290.997
291.007
291.115
291.19
291.223
291.246
291.258
291.27
291.287
291.323
291.347
291.38
291.397
291.443
291.447
291.527
291.54
291.545
291.561
291.563
291.581
291.623
291.64
291.679
291.723
291.727
291.843
291.848
291.867
291.872
291.887
291.889
291.904
291.91
291.923
291.969
291.981
292.001
292.02
292.031
292.033
292.069
292.072
292.085
292.106
292.117
292.202
292.242
292.27
292.284
292.316
292.318
292.413
292.424
292.435
292.448
292.45
292.452
292.486
292.511
292.533
292.557
292.561
292.571
292.578
292.585
292.591
292.602
292.619
292.625
292.63
292.666
292.71
292.739
292.781
292.822
292.866
292.907
292.907
292.917
292.944
292.958
292.998
293.004
293.007
293.022
293.046
293.046
293.062
293.08
293.106
293.114
293.115
293.128
293.167
293.192
293.206
293.223
293.316
293.333
293.358
293.399
293.408
293.41
293.456
293.46
293.465
293.491
293.52
293.525
293.531
293.548
293.582
293.62
293.624
293.637
293.675
293.703
293.715
293.721
293.743
293.768
293.774
293.803
293.826
293.828
293.86
293.88
293.957
293.986
293.99
293.995
294.002
294.003
294.058
294.06
294.12
294.12
294.136
294.144
294.162
294.173
294.181
294.204
294.205
294.218
294.225
294.241
294.266
294.283
294.299
294.341
294.407
294.412
294.425
294.467
294.492
294.512
294.519
294.527
294.536
294.542
294.552
294.556
294.624
294.63
294.7
294.707
294.738
294.751
294.79
294.831
294.867
294.868
294.892
294.896
294.896
294.994
295.086
295.093
295.101
295.152
295.209
295.214
295.225
295.256
295.321
295.326
295.349
295.357
295.379
295.403
295.469
295.522
295.569
295.616
295.629
295.645
295.647
295.667
295.692
295.775
295.817
295.929
296.101
296.104
296.113
296.16
296.178
296.231
296.249
296.272
296.29
296.309
296.325
296.328
296.331
296.436
296.458
296.463
296.468
296.498
296.5
296.523
296.557
296.565
296.568
296.75
296.779
296.796
296.797
296.816
296.837
296.847
296.855
296.858
296.886
296.938
296.968
296.993
297.097
297.107
297.147
297.234
297.256
297.265
297.269
297.307
297.309
297.324
297.427
297.499
297.514
297.523
297.552
297.574
297.576
297.62
297.636
297.705
297.715
297.743
297.77
297.771
297.784
297.802
297.83
297.839
297.841
297.842
297.872
297.908
297.929
297.952
297.983
297.998
298.001
298.024
298.052
298.067
298.07
298.115
298.115
298.139
298.171
298.195
298.271
298.274
298.28
298.325
298.338
298.338
298.406
298.411
298.445
298.447
298.45
298.481
298.53
298.54
298.544
298.585
298.605
298.63
298.701
298.718
298.723
298.759
298.786
298.795
298.801
298.802
298.822
298.845
298.847
298.868
298.922
298.985
299.01
299.037
299.06
299.139
299.159
299.185
299.194
299.229
299.257
299.336
299.45
299.478
299.49
299.562
299.625
299.698
299.749
299.759
299.788
[truncated: 346 more rows]
