# Supplementary material for: Variations of intracellular density during the cell cycle arise from tip-growth regulation in fission yeast
Source: eLife. 2021 Jun 8;10:e64901. doi: 10.7554/eLife.64901 (PMC8221806; doi:10.7554/eLife.64901)
Supplement: Figure 1—source data 3. [file elife-64901-fig1-data3.xlsx]

## Sheet: Fig1D_Homeostasis
Density at beginning of cell cycle	Density change during cell cycle
287.7	33.6613
266.861	43.6359
308.834	-2.88028
306.782	16.9402
292.117	28.6421
277.057	37.512
302.318	0.630383
296.796	27.2622
309.356	13.8204
297.952	-0.80471
274.55	30.1814
271.4	53.4092
309.617	-13.0488
288.458	11.5758
320.96	0.731389
278.594	13.4371
273.782	33.2066
272.291	43.1679
279.677	18.6479
265.251	32.5506
293.803	23.5566
315.64	-19.3909
296.104	-0.754638
276.755	18.1412
313.514	-8.08825
280.33	21.0705
270.83	39.859
310.488	17.4293
276.252	31.0096
274.291	24.719
304.377	5.53898
278.411	5.27661
280.214	22.6359
297.983	28.6934
293.624	-8.30477
315.695	-2.0638
274.87	22.6295
264.847	28.4857
282.15	16.6446
270.037	18.5034
298.845	4.40153
286.298	-0.734647
279.954	24.6868
274.801	27.0665
287.124	11.6787
278.074	30.1483
292.072	20.2648
293.316	23.0483
296.16	26.9408
276.919	20.1782
284.18	11.0756
260.027	43.5438
287.326	22.5155
299.625	-22.407
275.449	18.0114
278.626	15.9258
295.817	12.037
302.659	27.7298
265.403	21.3125
255.76	48.695
286.518	4.15082
292.71	15.7986
285.826	11.6882
292.907	17.0487
280.988	9.59555
293.206	10.4001
276.75	48.8197
277.412	15.2177
304.09	-5.10561
278.64	33.5439
280.412	11.149
286.368	19.7871
283.75	26.6733
263.45	35.4177
273.859	22.4502
294.519	17.5238
292.578	23.9504
290.997	39.3185
