# Supplementary material for: Variations of intracellular density during the cell cycle arise from tip-growth regulation in fission yeast
Source: eLife. 2021 Jun 8;10:e64901. doi: 10.7554/eLife.64901 (PMC8221806; doi:10.7554/eLife.64901)
Supplement: Figure 2—figure supplement 1—source data 1. [file elife-64901-fig2-figsupp1-data1.xlsx]

## Sheet: Fig2_S3B_septum_progression
Average septum progression
Time to division	Mean relative density at midcell	STD
45	0.0921485	0.0731527
40	0.10348	0.0803231
35	0.0979614	0.0751623
30	0.128357	0.0879002
25	0.197368	0.133569
20	0.378312	0.145852
15	0.545919	0.153908
10	0.736084	0.135661
5	0.888805	0.104443
0	0.965964	0.0835204
