# Supplementary material for: Variations of intracellular density during the cell cycle arise from tip-growth regulation in fission yeast
Source: eLife. 2021 Jun 8;10:e64901. doi: 10.7554/eLife.64901 (PMC8221806; doi:10.7554/eLife.64901)
Supplement: Figure 2—figure supplement 2—source data 1. [file elife-64901-fig2-figsupp2-data1.xlsx]

## Sheet: Fig2 & 2S2_Mother-Daughter
Rel. mean daughter density	Rel. mean daughter volume		Mother cell density	Daughters mean density
0.963806	1.06486		319.367	307.808
0.911325	0.982171		304.261	277.281
0.93215	0.966662		321.361	299.557
0.977962	0.959761		310.497	303.654
0.930164	0.984967		305.953	284.587
0.843237	0.964015		323.722	272.975
0.852488	0.888146		320.759	273.443
0.949245	0.970349		314.569	298.603
0.932708	1.10657		302.949	282.562
0.923541	0.990156		324.058	299.281
0.877211	1.02668		323.177	283.494
0.931327	0.970224		297.147	276.741
0.935907	1.01083		304.731	285.2
0.975117	0.852955		324.809	316.727
0.919928	1.01064		325.066	299.037
0.945764	1.02328		316.968	299.777
0.934992	1.04273		296.568	277.288
0.933157	1.0681		300.034	279.979
0.971429	1.11198		321.691	312.5
0.958048	0.937585		292.031	279.78
0.927641	0.966525		294.334	273.036
0.943711	1.04721		288.716	272.464
0.89929	0.839461		306.989	276.072
0.969611	1.07481		315.458	305.872
0.961006	1.021		298.325	286.692
0.947732	1.0085		297.802	282.236
0.959863	1.13572		317.359	304.621
0.955284	0.937911		296.249	283.002
0.912208	0.928562		295.349	269.42
0.938816	0.981241		306.377	287.631
0.954113	1.16607		304.638	290.659
0.907902	1.22166		327.041	296.922
0.901272	1.15923		305.425	275.271
0.966801	1.15867		301.4	291.394
0.930508	0.940334		310.689	289.099
0.929074	1.23		327.917	304.659
0.96348	1.01208		307.261	296.04
1.04046	1.07772		299.01	311.109
0.943013	1.22631		309.916	292.255
0.961283	0.990469		294.058	282.673
0.937122	0.921125		302.85	283.807
0.996672	0.857554		326.677	325.589
0.975423	1.15354		285.319	278.307
0.927498	1.07144		313.631	290.892
0.92868	1.14448		290.583	269.858
0.973715	1.22741		283.547	276.094
0.929349	1.06936		297.499	276.481
0.956225	1.17818		293.333	280.492
0.93468	1.24071		298.795	279.278
0.952602	1.17871		288.54	274.864
0.935806	1.16928		312.641	292.571
0.914693	1.02634		303.247	277.377
0.98962	1.08097		285.563	282.599
0.960785	0.909037		304.64	292.694
0.954487	0.916087		301.868	288.129
0.982173	0.883997		298.802	293.476
0.898887	0.973301		302.712	272.104
0.904259	1.06948		312.337	282.433
0.926052	1.09216		316.364	292.97
1.00675	0.920252		323.101	325.28
0.938124	1.07164		297.097	278.714
0.978589	1.12542		295.256	288.934
0.929056	1.03626		303.571	282.034
0.892565	1.07876		309.842	276.554
0.924101	1.0669		277.218	256.177
0.938522	1.05139		318.84	299.238
0.950916	1.08647		291.338	277.038
0.974152	1.12745		293.46	285.875
0.88467	1.0382		294.552	260.582
0.953635	1.0066		307.854	293.58
0.958508	0.935239		330.389	316.68
0.968891	1.04187		286.716	277.796
0.875065	1.02709		304.455	266.418
0.948258	0.969129		291.91	276.806
0.956702	1.09361		302.36	289.268
0.930112	0.870671		308.509	286.948
0.957863	1.1225		297.514	284.978
0.922792	1.05532		309.956	286.025
0.984364	1.05053		290.584	286.04
0.971084	1.09494		303.606	294.827
0.892239	0.996014		325.57	290.486
0.983436	0.940954		295.648	290.751
0.923887	1.06025		302.554	279.526
0.923547	1.02135		292.63	270.258
1.01025	0.985237		298.985	302.049
0.932693	0.940576		312.184	291.172
0.95099	1.03914		291.561	277.272
0.923032	1.22406		291.057	268.655
0.978953	1.18129		291.188	285.059
1.01036	1.08536		292.085	295.112
0.963965	0.997366		302.695	291.787
