# Supplementary material for: Variations of intracellular density during the cell cycle arise from tip-growth regulation in fission yeast
Source: eLife. 2021 Jun 8;10:e64901. doi: 10.7554/eLife.64901 (PMC8221806; doi:10.7554/eLife.64901)
Supplement: Figure 2—figure supplement 3—source data 1. [file elife-64901-fig2-figsupp3-data1.xlsx]

## Sheet: Fig2E_F2S_BuoyantDensity
Density (g/ml)	Volume (fl)		Density(g/ml)	Volume (fl)
1.11646	80.9		1.11088	84.2382
1.10466	82.5445		1.11387	85.8284
1.11009	84.007		1.11083	88.3975
1.10936	85.1466		1.11887	91.0719
1.11152	86.5384		1.11046	91.1745
1.11224	87.952		1.11626	93.266
1.11116	90.418		1.11787	98.7217
1.10579	90.733		1.12056	98.9512
1.10985	95.0846		1.11646	100.7
1.10732	95.1472		1.11546	101.741
1.1139	96.0085		1.10516	101.813
1.11139	96.0534		1.10374	101.939
1.10844	96.8807		1.10996	102.026
1.11055	97.2461		1.11424	103.994
1.10065	99.637		1.12164	104.102
1.10803	100.163		1.11301	105.848
1.11093	101.842		1.1205	106.037
1.11352	102.34		1.11426	106.079
1.11175	102.525		1.11365	106.661
1.10715	104.052		1.10587	107.418
1.10757	104.164		1.11052	108.251
1.10647	104.167		1.11274	108.28
1.10959	104.314		1.10808	108.46
1.11238	104.766		1.10825	108.54
1.11288	105.694		1.11399	111.122
1.1047	105.822		1.11165	111.769
1.11722	106.426		1.10656	113.182
1.12024	106.692		1.10505	113.687
1.11008	107.321		1.10901	114.425
1.10205	107.77		1.1119	114.623
1.11026	109.644		1.11035	115.424
1.11276	109.89		1.10772	115.463
1.10936	110.281		1.11556	116.18
1.10996	110.819		1.10816	117.129
1.11515	111.182		1.11203	118.297
1.10588	114.587		1.10678	118.61
1.09865	116.396		1.10547	118.669
1.1066	116.597		1.10666	119.461
1.10273	117.558		1.10592	120.292
1.10685	118.548		1.11619	120.982
1.11274	119.433		1.1041	121.73
1.1105	119.624		1.12584	122.108
1.09756	122.284		1.11245	122.627
1.10667	122.768		1.11118	123.456
1.10757	123.972		1.10854	124.153
1.11225	123.975		1.11651	124.489
1.10716	125.027		1.1085	124.752
1.11143	125.48		1.11151	125.077
1.10441	126.265		1.10995	125.199
1.11113	126.468		1.10247	125.279
1.11431	126.569		1.11139	125.401
1.10819	126.96		1.10339	126.567
1.11123	127.061		1.1066	127.408
1.10471	127.262		1.10446	127.73
1.11084	127.358		1.10598	128.273
1.11037	127.439		1.10152	128.726
1.10749	128.65		1.10715	128.77
1.10631	130.766		1.10486	129.774
1.10837	131.274		1.10255	130.492
1.0998	131.861		1.11098	131.12
1.10992	131.892		1.10672	132.047
1.10901	133.017		1.10621	132.648
1.1056	133.328		1.11035	134.307
1.10126	133.571		1.10829	134.789
1.10218	133.906		1.11506	135.216
1.10947	135.111		1.10643	136.767
1.10394	135.458		1.11234	137.115
1.11294	136.488		1.10318	137.244
1.10899	137.206		1.10447	138.216
1.1106	138.674		1.10912	138.493
1.10398	138.732		1.10308	138.976
1.10487	138.753		1.11781	141.741
1.108	139.119		1.11238	141.831
1.1004	139.304		1.10566	141.924
1.10479	139.327		1.10822	143.169
1.10107	140.704		1.10463	143.256
1.10725	142		1.12168	143.439
1.1127	142.843		1.11283	144.004
1.10488	142.927		1.10846	144.111
1.10169	143.423		1.10415	144.599
1.10339	143.427		1.10586	144.749
1.09939	143.544		1.10549	145.152
1.10463	143.572		1.11419	146.467
1.10752	144.425		1.10079	146.751
1.10081	145.293		1.1123	147.668
1.1092	146.553		1.10913	147.822
1.11245	146.916		1.09815	148.415
1.10148	147.264		1.11355	148.746
1.10538	148.815		1.11713	150.736
1.10559	151.221		1.1031	150.975
1.11516	151.772		1.11188	153.677
1.1095	152.095		1.10104	156.955
1.10442	152.434		1.11166	157.383
1.11174	153.988		1.11717	157.803
1.10742	154.027		1.10641	158.14
1.09602	154.131		1.10348	159.145
1.10384	154.697		1.13089	159.692
1.10415	156.437		1.10489	160.24
1.11143	156.556		1.11215	160.684
1.09419	158.553		1.10555	160.805
1.10857	159.312		1.09839	162.565
1.10529	159.472		1.10188	162.601
1.10829	159.562		1.10239	162.924
1.10956	159.737		1.10787	165.312
1.10809	159.776		1.10204	165.607
1.09856	160.455		1.10512	166.283
1.11457	161.546		1.09904	166.362
1.11228	161.594		1.09998	166.565
1.11288	162.475		1.10404	166.642
1.11197	162.858		1.10589	166.851
1.11308	163.042		1.11163	167.503
1.10995	163.658		1.09992	168.571
1.11063	163.997		1.10669	168.644
1.11115	164.967		1.10373	169.669
1.10538	165.005		1.10363	170.11
1.10555	165.028		1.10334	173.065
1.09791	166.867		1.10296	174.958
1.10839	166.9		1.10628	175.827
1.11317	166.953		1.10184	176.6
1.10832	168.036		1.10392	177.028
1.10655	169.199		1.1062	177.323
1.11527	170.055		1.11597	177.442
1.11548	171.242		1.10996	178.16
1.10096	171.358		1.11735	180.242
1.10504	171.718		1.11847	180.264
1.10935	172.399		1.11029	180.798
1.10907	173.548		1.10783	183.212
1.10468	173.941		1.098	183.709
1.11359	173.987		1.1005	183.747
1.11073	174.328		1.11322	186.629
1.11222	174.342		1.10757	187.158
1.10761	175.259		1.10129	190.093
1.11593	175.45		1.1106	191.941
1.10733	175.467		1.11294	192.372
1.10223	175.554		1.11436	193.476
1.11357	175.645		1.11551	196.39
1.11202	176.084		1.1086	196.421
1.11121	183.078		1.1083	196.559
1.10749	186.588		1.11416	200.347
1.10911	188.909		1.10977	204.288
1.11422	189.178		1.1087	206.097
1.10865	189.385		1.11225	206.702
1.11316	191.014		1.10965	206.846
1.10978	194.764		1.10664	207.932
1.11293	195.095		1.11319	209.787
1.11152	195.291
1.11823	196.713
1.11078	197.54
1.10701	198.134
1.1159	199.241
1.11026	200.588
1.10886	201.187
1.11136	203.495
1.11007	205.008
1.11148	207.805
1.11212	208.331
1.11142	209.808
1.10992	210.983
1.10735	211.336
1.11625	214.317

## Sheet: Fig2 & 2S2_Mother-Daughter
Rel. mean daughter density	Rel. mean daughter volume		Mother cell density	Daughters mean density
0.963806	1.06486		319.367	307.808
0.911325	0.982171		304.261	277.281
0.93215	0.966662		321.361	299.557
0.977962	0.959761		310.497	303.654
0.930164	0.984967		305.953	284.587
0.843237	0.964015		323.722	272.975
0.852488	0.888146		320.759	273.443
0.949245	0.970349		314.569	298.603
0.932708	1.10657		302.949	282.562
0.923541	0.990156		324.058	299.281
0.877211	1.02668		323.177	283.494
0.931327	0.970224		297.147	276.741
0.935907	1.01083		304.731	285.2
0.975117	0.852955		324.809	316.727
0.919928	1.01064		325.066	299.037
0.945764	1.02328		316.968	299.777
0.934992	1.04273		296.568	277.288
0.933157	1.0681		300.034	279.979
0.971429	1.11198		321.691	312.5
0.958048	0.937585		292.031	279.78
0.927641	0.966525		294.334	273.036
0.943711	1.04721		288.716	272.464
0.89929	0.839461		306.989	276.072
0.969611	1.07481		315.458	305.872
0.961006	1.021		298.325	286.692
0.947732	1.0085		297.802	282.236
0.959863	1.13572		317.359	304.621
0.955284	0.937911		296.249	283.002
0.912208	0.928562		295.349	269.42
0.938816	0.981241		306.377	287.631
0.954113	1.16607		304.638	290.659
0.907902	1.22166		327.041	296.922
0.901272	1.15923		305.425	275.271
0.966801	1.15867		301.4	291.394
0.930508	0.940334		310.689	289.099
0.929074	1.23		327.917	304.659
0.96348	1.01208		307.261	296.04
1.04046	1.07772		299.01	311.109
0.943013	1.22631		309.916	292.255
0.961283	0.990469		294.058	282.673
0.937122	0.921125		302.85	283.807
0.996672	0.857554		326.677	325.589
0.975423	1.15354		285.319	278.307
0.927498	1.07144		313.631	290.892
0.92868	1.14448		290.583	269.858
0.973715	1.22741		283.547	276.094
0.929349	1.06936		297.499	276.481
0.956225	1.17818		293.333	280.492
0.93468	1.24071		298.795	279.278
0.952602	1.17871		288.54	274.864
0.935806	1.16928		312.641	292.571
0.914693	1.02634		303.247	277.377
0.98962	1.08097		285.563	282.599
0.960785	0.909037		304.64	292.694
0.954487	0.916087		301.868	288.129
0.982173	0.883997		298.802	293.476
0.898887	0.973301		302.712	272.104
0.904259	1.06948		312.337	282.433
0.926052	1.09216		316.364	292.97
1.00675	0.920252		323.101	325.28
0.938124	1.07164		297.097	278.714
0.978589	1.12542		295.256	288.934
0.929056	1.03626		303.571	282.034
0.892565	1.07876		309.842	276.554
0.924101	1.0669		277.218	256.177
0.938522	1.05139		318.84	299.238
0.950916	1.08647		291.338	277.038
0.974152	1.12745		293.46	285.875
0.88467	1.0382		294.552	260.582
0.953635	1.0066		307.854	293.58
0.958508	0.935239		330.389	316.68
0.968891	1.04187		286.716	277.796
0.875065	1.02709		304.455	266.418
0.948258	0.969129		291.91	276.806
0.956702	1.09361		302.36	289.268
0.930112	0.870671		308.509	286.948
0.957863	1.1225		297.514	284.978
0.922792	1.05532		309.956	286.025
0.984364	1.05053		290.584	286.04
0.971084	1.09494		303.606	294.827
0.892239	0.996014		325.57	290.486
0.983436	0.940954		295.648	290.751
0.923887	1.06025		302.554	279.526
0.923547	1.02135		292.63	270.258
1.01025	0.985237		298.985	302.049
0.932693	0.940576		312.184	291.172
0.95099	1.03914		291.561	277.272
0.923032	1.22406		291.057	268.655
0.978953	1.18129		291.188	285.059
1.01036	1.08536		292.085	295.112
0.963965	0.997366		302.695	291.787

## Sheet: Fig3_cdc25
WT cells
Time (min)		Volume (um3)
0		91.0717	97.684	77.0774	65.3055	68.125	54.2678	78.7704	65.7146	84.0494	75.9653	81.5787	81.4593	74.3567	88.904	94.0843	81.3945	96.7565	63.1589	75.5288	67.6643	83.0045	98.3553	82.7955	84.0889	83.0158	89.4186	97.6387	78.5597	73.2906	75.5348	77.4782	92.3292	100.537
10		98.4736	109.264	83.6562	83.4111	82.6441	72.6809	84.8095	67.615	87.5016	87.9074	88.0009	83.7652	94.2224	100.769	78.7131	104.232	76.1373	81.32	71.6412	89.3155	99.525	86.0947	91.8407	88.6748	102.797	110.114	80.4867	73.7882	75.0814	84.8437	102.982	102.504	NaN
20		96.1194	104.991	115.323	89.787	90.9764	91.2184	81.2631	90.5219	72.4327	89.847	95.3355	92.6487	91.033	106.656	84.5701	112.478	82.0993	86.7397	80.2391	94.6306	103.819	89.2213	96.5961	91.6576	110.958	118.67	86.063	78.3275	80.288	89.6241	111.633	107.928	NaN
30		99.345	112.782	122.565	95.9078	99.847	100.597	90.7746	96.492	77.0104	95.1363	102.785	98.4486	98.3367	113.341	88.3485	121.039	89.5838	92.1987	84.8078	98.8354	107.692	93.592	101.765	96.5239	120.719	129.056	91.622	81.8376	83.8384	95.2192	119.654	112.017	NaN
40		106.481	103.479	119.998	127.493	101.451	104.774	107.312	96.5195	102.755	81.4017	100.837	108.541	104.068	105.407	120.558	95.3681	94.395	97.9027	91.0688	103.268	112.672	100.641	109.92	101.697	129.764	139.644	97.4432	86.3168	88.3422	99.9538	126.345	118.505	NaN
50		116.934	126.827	107.911	130.241	127.555	133.683	108.338	110.852	115.159	102.113	109.716	88.1621	107.356	114.331	109.369	112.794	127.974	99.3985	104.247	98.2401	108.783	118.446	106.483	116.552	107.168	136.227	147.241	105.16	91.8062	94.7246	105.515	131.963	124.563
60		133.088	112.069	101.614	137.644	136.96	139.925	115.022	118.188	122	108.189	116.276	121.07	115.547	120.252	135.86	104.48	111.548	104.192	114.596	123.755	114.548	145.505	157.359	96.4664	99.6244	111.967	137.786	130.348	NaN	NaN	NaN	NaN	NaN
70		94.6059	115.64	139.315	117.791	106.864	146.037	114.169	123.712	112.06	144.061	146.76	121.671	124.607	128.502	113.486	124.018	126.608	122.642	128.332	144.754	110.629	118.909	109.53	119.879	129.897	121.624	153.66	167.117	101.674	104.826	118.697	144.352	136.647
80		99.0462	121.664	145.817	122.787	112.626	154.511	151.98	154.29	128.889	131.302	135.265	119.869	131.99	133.817	129.247	136.85	151.478	116.402	127.304	127.214	136.428	129.229	161.56	177.721	106.86	110.774	125.636	151.14	143.992	NaN	NaN	NaN	NaN
90		120.714	130.423	117.577	104.485	127.872	151.412	128.486	118.812	162.765	117.963	122.797	159.982	162.442	135.949	137.986	141.304	125.658	140.086	141.403	136.285	142.943	157.033	123.146	135.263	133.675	143.055	136.599	169.143	112.349	116.675	133.438	NaN	151.11
100		127.805	138.416	109.727	134.707	157.048	136.945	124.673	170.676	135.148	145.869	128.199	NaN	171.602	143.323	NaN	146.085	132.939	148.435	148.89	142.87	NaN	NaN	130.106	NaN	139.395	148.866	145.078	NaN	118.672	123.392	140.539	NaN	157.897
110		123.063	116.094	141.446	162.228	145.106	132.512	177.334	144.723	155.217	133.72	NaN	NaN	150.661	NaN	NaN	139.852	156.883	NaN	NaN	NaN	NaN	137.429	NaN	143.974	NaN	153.592	NaN	125.208	129.689	147.39	NaN	NaN	NaN
Time (min)		Density (mg/ml)
0		249.481	253.089	251.461	288.82	303.707	296.623	242.236	269.432	272.402	246.701	284.889	242.167	266.558	273.209	236.141	266.425	273.883	291.727	273.438	290.561	251.365	278.359	273.285	268.275	246.973	285.945	294.342	272.983	237.923	235.306	257.601	276.342	266.649
10		252.51	250.808	262.677	277.703	281.23	290.133	260.074	270.884	271.978	248.327	243.339	258.719	264.606	238.475	271.09	278.267	280.833	274.174	279.056	251.7	281.704	265.502	257.275	247.708	284.315	284.951	276.204	251.738	254.511	263.731	276.445	282.587	NaN
20		285.409	248.787	250.397	259.972	268.274	274.484	282.212	254.647	266.577	270.139	251.901	245.376	256.422	239.607	269.545	273.725	271.748	272.496	271.255	248.53	279.426	265.098	255.522	252.611	281.014	281.938	271.905	248.953	250.374	265.257	271.74	282.042	NaN
30		264.261	246.556	251.239	259.591	261.411	264.784	274.182	254.674	262.821	265.924	249.635	244.733	247.955	241.594	270.364	269.85	264.533	269.163	264.48	248.774	277.053	264.13	255.653	256.772	281.604	280.664	271.221	252.474	251.289	265.989	269.704	280.618	NaN
40		280.888	260.773	242.862	253.621	257.066	258.492	262.914	270.859	245.736	263.878	261.999	249.487	243.789	242.121	242.139	264.456	261.042	266.434	261.614	246.807	275.004	260.348	252.602	259.79	276.819	283.452	271.417	249.821	246.065	263.212	268.938	278.351	NaN
50		278.548	271.417	260.19	263.46	241.914	253.965	251.876	252.97	257.722	262.88	241.214	259.654	259.766	245.845	242.337	236.807	241.538	259.566	262.028	254.895	248.226	274.845	260.599	254.75	260.428	273.819	278.892	267.431	248.463	244.197	260.43	265.658	270.789
60		264.777	257.994	262.097	259.738	242.143	250.305	246.926	251.419	254.218	256.839	237.781	243.902	239.259	232.468	242.392	257.768	255.825	248.861	248.694	273.245	259.739	272.548	274.463	248.764	244.688	256.417	263.919	267.124	NaN	NaN	NaN	NaN	NaN
70		257.425	255.622	260.266	255.224	257.822	260.24	259.36	252.278	266.768	246.849	249.859	244.033	248.822	251.155	255.501	239.723	240.745	235.703	232.146	241.421	260.149	251.714	249.678	251.068	269.503	259.357	270.628	269.866	248.751	245.902	252.525	260.659	261.949
80		254.333	252.153	255.714	251.522	257.592	258.544	250.01	246.169	245.434	251.047	254.092	258.343	236.612	243.378	233.498	234.353	243.238	260.843	252.453	251.637	267.315	258.956	267.743	257.944	248.98	251.098	249.306	258.602	262.664	NaN	NaN	NaN	NaN
90		258.78	253.806	264.349	254.026	252.377	250.221	250.429	253.057	256.546	245.258	261.577	251.085	243.245	243.122	252.975	254.418	257.782	235.922	244.469	231.145	237.092	249.111	259.365	250.6	251.688	263.534	257.6	266.929	248.554	249.201	246.211	NaN	263.299
100		257.85	249.337	251.908	249.684	249.116	253.881	253.6	256.696	256.494	248.713	257.665	NaN	241.21	241.687	NaN	258.717	255.912	237.824	244.951	230.931	NaN	NaN	254.737	NaN	255.301	260.348	256.891	NaN	247.031	248.988	244.171	NaN	262.203
110		244.884	249.518	248.857	250.721	252.702	253.531	256.98	253.018	248.377	252.3	NaN	NaN	245.272	NaN	NaN	258.597	236.884	NaN	NaN	NaN	NaN	251.51	NaN	260.372	NaN	255.214	NaN	245.379	246.089	243.232	NaN	NaN	NaN
Time (min)		Mass (pg)
0		22.7207	24.7228	19.3819	18.8615	20.69	16.0971	19.081	17.7056	22.8952	18.7407	23.2409	19.7267	19.8204	24.2894	22.2172	21.6856	26.5	18.4252	20.6524	19.6607	20.8644	27.3781	22.6267	22.5589	20.5027	25.5688	28.7391	21.4454	17.4375	17.7738	19.9585	25.5145	26.8081
10		24.871	27.3921	22.014	23.0695	23.0809	21.0434	22.0813	18.2987	23.7846	21.8607	21.4157	21.6288	24.9273	24.036	21.3193	29.0252	21.3079	22.2938	19.9654	22.4787	28.035	22.8277	23.5371	21.9725	29.1604	31.3601	22.2249	18.5786	19.1274	22.3983	28.5119	29.0303	NaN
20		27.4146	26.0481	28.8611	23.3355	24.2515	24.8577	22.8002	23.0138	19.2643	24.2609	24.0808	22.7476	23.2854	25.5715	22.7593	30.7427	22.1772	23.62	21.6249	23.4832	28.9942	23.6301	24.6001	23.1722	31.1019	33.404	23.3686	19.4784	20.0733	23.7903	30.301	30.4741	NaN
30		26.2474	27.7017	30.8066	24.8336	26.0609	26.5902	24.8038	24.463	20.1649	25.236	25.6621	24.081	24.2935	27.4037	23.8481	32.5465	23.635	24.77	22.3392	24.5655	29.7928	24.7233	26.0012	24.8207	33.9743	36.2703	24.8134	20.6334	20.9941	25.3088	32.2478	31.392	NaN
40		29.8276	26.9945	29.0561	32.3503	26.0157	27.0378	28.1467	26.043	25.2076	21.4252	26.3818	27.0211	25.3483	25.4125	29.2162	25.1696	24.6067	26.0501	23.6817	25.4984	30.9645	26.1699	27.7625	26.435	35.9207	39.619	26.3952	21.5618	21.7253	26.2683	33.9256	32.8608	NaN
50		32.4921	34.3415	28.051	34.1769	30.8182	33.9696	27.2502	28.0375	29.6225	26.7984	26.4017	22.8944	27.8195	28.0624	26.4599	26.5886	30.8976	25.8096	27.2538	24.9855	27.0077	32.5662	27.6832	29.6334	27.8864	37.2445	41.038	28.1421	22.8124	23.1267	27.4205	35.0685	33.6886
60		35.1385	28.8943	26.5694	35.6962	33.2286	34.9945	28.3503	29.6331	30.9294	27.7319	27.6155	29.5134	27.6142	27.9199	32.9102	26.9603	28.4353	25.8905	28.5179	33.8146	29.7427	39.5955	43.0848	24.0082	24.4093	28.679	36.3436	34.7928	NaN	NaN	NaN	NaN	NaN
70		24.3429	29.4897	36.1666	30.0176	27.5345	38.0273	29.5664	31.1565	29.8618	35.6448	36.6017	29.6312	30.9584	32.2466	28.9786	29.7457	30.514	28.8723	29.8829	34.921	28.7887	29.8613	27.3135	30.0907	34.9765	31.5055	41.5216	45.0073	25.2556	25.787	29.9204	37.5627	35.7889
80		25.1593	30.6589	37.233	30.8562	28.976	39.9897	38.0684	37.9059	31.6339	32.9805	34.41	30.9955	31.2161	32.6039	30.1342	32.1315	36.8682	30.3542	32.1237	32.0236	36.3879	33.4834	43.291	45.8421	26.6075	27.853	31.282	39.0273	37.8077	NaN	NaN	NaN	NaN
90		31.2153	33.035	31.0443	26.4871	32.2508	37.8724	32.1626	30.0544	41.7291	28.8915	32.0843	40.165	39.4811	33.0709	34.9519	36.0093	32.4325	33.0536	34.5844	31.4685	33.9437	39.1872	31.907	33.9434	33.6544	37.6241	35.1947	45.1724	27.9328	29.0947	32.7963	NaN	39.7728
100		32.9885	34.5145	27.6449	33.6308	39.1107	34.8256	31.6017	43.7152	34.6156	36.2707	32.9937	NaN	41.4274	34.6541	NaN	37.8565	34.0165	35.2648	36.4668	32.9869	NaN	NaN	33.086	NaN	35.6219	38.7419	37.2351	NaN	29.2865	30.6827	34.2763	NaN	41.4228
110		30.1093	28.9746	35.1979	40.6809	36.7242	33.5853	45.5178	36.4734	38.5405	33.6869	NaN	NaN	36.91	NaN	NaN	36.1036	37.1631	NaN	NaN	NaN	NaN	34.524	NaN	37.5391	NaN	39.1633	NaN	30.6993	31.8677	35.8613	NaN	NaN	NaN
cdc25-22 cells
Time (min)		Volume (µm3)
0		154.126	149.481	120.467	162.486	183.441	169.526	151.084	153.78	159.196	156.782	177.787	145.303	127.349	138.45	139.245	117.264	149.744	159.804	169.019	179.686	157.761	NaN
10		158.839	155.317	125.65	168.532	194.05	184.468	161.356	159.866	167.583	164.67	184.714	161.598	143.38	145.559	148.001	121.426	145.49	166.812	194.091	165.363	NaN	NaN
20		183.306	164.853	159.463	129.979	177.953	206.589	192.563	168.478	169.593	176.241	175.636	193.28	174.61	155.837	153.902	156.164	126.164	157.363	175.992	201.522	173.138	211.749
30		171.928	167.585	136.517	184.18	219.2	202.92	177.56	178.123	186.328	185.552	201.968	160.987	164.751	131.436	164.866	186.458	181.693	217.863	NaN	NaN	NaN	NaN
40		198.732	188.054	168.679	176.884	174.871	145.729	193.651	232.722	210.885	186.429	189.36	197.814	196.148	212.194	165.514	170.196	135.341	176.518	193.551	191.013	227.71	NaN
50		196.932	177.125	185.452	185.15	153.617	203.837	246.976	218.968	195.368	200.054	209.688	206.888	224.155	173.87	177.608	142.059	189.97	203.807	200.614	238.167	NaN	NaN
60		216.382	208.259	187.628	194.806	194.634	213.74	261.586	231.498	208.167	207.044	223.805	216.947	233.903	182.477	185.772	149.856	200.055	213.994	212.188	250.439	NaN	NaN
70		161.89	218.89	196.714	206.34	207.765	224.429	276.989	243.85	221.354	217.13	238.01	227.811	241.625	191.768	195.479	157.822	212.132	224.458	220.027	261.749	NaN	NaN
80		233.05	170.694	227.845	205.431	220.088	218.319	177.208	238.088	292.254	250.863	228.633	228.455	251.205	239.848	251.848	203.573	205.411	167.652	224.653	234.528	231.077	272.782
90		237.295	213.933	230.766	183.688	250.597	307.946	263.716	241.478	239.679	265.785	252.432	261.995	238.157	249.86	242.9	284.53	NaN	NaN	NaN	NaN	NaN	NaN
100		250.79	235.541	249.942	225.224	217.899	218.804	181.08	242.931	191.072	265.382	322.616	277.454	256.36	250.157	281.264	264.892	271.692	251.787	262.072	254.357	299.527	NaN
110		269.816	261.277	235.222	228.294	229.972	189.974	256.575	200.142	280.945	336.184	288.904	268.397	265.279	298.508	281.592	284.714	264.564	275.925	265.437	313.598	NaN	NaN
120		280.641	250.297	273.237	246.56	240.659	241.532	198.372	269.769	208.89	296.364	352.695	301.15	281.313	277.877	313.691	295.955	300.869	276.274	290.721	283.761	329.267	NaN
130		291.072	265.352	282.26	254.592	252.849	254.72	209.009	283.279	219.552	311.968	369.073	319.768	300.989	290.966	329.025	308.765	312.229	290.214	305.28	298.704	347.723	NaN
140		301.443	280.273	294.687	266.651	264.183	267.419	218.647	296.249	229.552	328.088	387.945	335.062	316.092	304.447	343.332	320.584	324.586	302.066	319.78	314.599	364.276	NaN
150		311.381	293.93	308.222	279.319	277.181	280.708	227.165	310.042	240.163	342.647	407.61	352.299	330.928	318.984	356.147	333.746	340.918	313.941	335.663	331.384	380.931	NaN
160		323.937	310.566	321.243	291.442	290.534	295.366	239.434	324.362	247.678	358.061	427.979	370.598	348.551	334.897	366.078	344.95	353.995	328.946	350.673	347.817	395.182	NaN
170		341.181	321.872	334.284	303.352	302.145	311.666	253.384	338.274	258.397	372.587	NaN	383.567	365.035	350.942	376.558	358.965	366.016	349.485	367.155	365.249	409.72	NaN
180		358.733	334.093	352.007	322.187	318.411	326.234	262.749	353.637	270.227	390.052	NaN	399.43	382.644	367.279	390.098	371.539	382.74	366.949	384.744	380.624	424.221	NaN
190		369.982	341.467	367.95	338.074	327.762	334.002	268.373	368.11	281.311	404.044	NaN	413.711	400.215	383.668	402.022	388.333	396.717	383.516	NaN	NaN	NaN	NaN
200		388.026	354.221	382.789	352.869	339.795	348.303	281.87	NaN	293.85	NaN	NaN	NaN	417.655	399.915	NaN	404.37	NaN	NaN	NaN	NaN	NaN	NaN
210		404.682	367.233	398.583	369.887	NaN	362.8	295.784	NaN	309.922	NaN	NaN	435.974	415.559	NaN	417.339	NaN	NaN	NaN	NaN	NaN	NaN	NaN
Time (min)		Density (mg/ml)
0		272.644	252.061	298.609	262.135	267.034	259.929	259.088	265.532	272.732	283.157	266.876	274.803	273.355	255.678	273.457	260.542	266.764	267.178	252.85	257.453	270.676	NaN
10		260.705	261.075	286.219	271.065	270.245	258.779	250.335	264.196	269.211	276.175	266.807	275.255	267.531	257.013	270.743	264.243	281.721	265.779	261.611	269.209	NaN	NaN
20		263.395	257.654	261.156	280.075	272.359	269.435	257.256	250.618	257.021	265.389	272.376	268.293	269.001	262.457	253.976	263.192	271.819	281.877	263.335	264.547	267.663	262.2
30		252.489	262.725	273.003	273.056	267.725	255.515	247.446	253.882	262.102	269.825	269.291	254.929	255.063	272.326	281.744	260.663	265.392	261.531	NaN	NaN	NaN	NaN
40		261.441	263.86	258.737	251.779	260.43	266.351	269.208	265.134	253.085	244.915	249.907	260.193	265.256	270.138	255.764	252.245	269.854	276.567	258.379	263.089	255.278	NaN
50		259.936	257.404	250.662	256.53	264.085	268.3	260.901	253.067	247.332	246.149	258.297	263.505	268.023	257.675	249.675	271.908	274.563	255.779	260.441	247.541	NaN	NaN
60		258.663	256.276	257.456	248.538	255.088	264.594	257.056	250.394	244.323	245.021	258.199	262.667	268.628	257.126	246.746	270.115	271.376	253.01	259.903	246.512	NaN	NaN
70		260.211	253.27	255.495	248.312	252.968	262.653	254.676	249.71	242.492	246.716	257.004	261.466	267.556	262.788	245.98	263.707	267.466	253.18	254.293	243.791	NaN	NaN
80		253.375	260.221	253.023	255.891	248.071	249.213	259.214	261.582	251.437	250.43	242.011	245.067	256.574	257.918	266.389	261.583	248.741	261.401	267.169	253.951	253.365	241.19
90		254.07	252.543	249.948	259.566	262.197	248.294	252.217	242.641	246.818	253.97	258.922	265.793	265.428	253.495	251.116	242.142	NaN	NaN	NaN	NaN	NaN	NaN
100		250.573	245.071	254.536	247.496	260.55	244.127	259.988	251.601	261.238	263.109	248.013	252.059	239.005	249.152	253.202	258.31	265.886	262.938	257.4	251.321	241.926	NaN
110		250.464	253.399	245.17	259.538	243.119	257.512	251.785	262.49	264.356	244.281	252.957	237.81	248.361	251.125	256.12	263.446	260.332	257.005	252.174	237.037	NaN	NaN
120		247.604	244.246	253.989	243.809	261.403	244.409	256.943	249.993	257.712	265.64	242.816	253.48	237.649	249.712	249.307	252.414	261.195	257.853	256.12	255.412	237.315	NaN
130		252.486	243.327	253.113	242.936	257.935	244.028	256.199	249.679	255.521	264.804	242.43	253.663	237.956	251.315	247.876	250.896	260.532	254.624	255.694	256.67	235.691	NaN
140		255.228	241.374	255.018	249.175	259.198	242.971	256.294	246.712	251.937	264.612	241.702	251.945	236.917	252.016	247.668	248.232	261.153	254.605	255.346	259.66	235.456	NaN
150		256.298	240.35	255.294	251.588	257.221	242.902	256.265	241.642	248.5	261.473	240.491	253.585	238.702	248.618	249.181	247.703	257.831	250.125	251.361	260.67	235.935	NaN
160		257.199	239.281	253.94	250.957	256.42	243.232	258.399	238.357	247.985	258.372	244.429	252.763	238.703	249.853	248.36	244.551	255.798	249.873	251.679	259.059	234.946	NaN
170		257.608	241.386	251.554	252.452	254.854	241.222	255.62	236.663	247.801	256.383	NaN	252.404	239.65	246.675	249.184	243.804	257.049	247.344	250.652	257.279	239.389	NaN
180		254.036	241.38	251.125	250.453	250.604	240.706	254.161	237.978	247.889	254.846	NaN	249.968	237.888	244.474	246.892	242.214	255.421	246.416	247.113	255.421	242.037	NaN
190		251.321	242.368	248.952	245.152	246.367	241.268	254.789	239.108	247.931	250.549	NaN	249.367	237.29	240.43	248.519	242.984	255.739	246.372	NaN	NaN	NaN	NaN
200		249.132	244.22	248.166	243.48	246.366	240.674	255.781	NaN	249.465	NaN	NaN	NaN	236.117	239.713	NaN	242.102	NaN	NaN	NaN	NaN	NaN	NaN
210		248.3	244.544	251.093	243.248	NaN	239.768	251.278	NaN	251.766	NaN	NaN	234.487	239.406	NaN	245.502	NaN	NaN	NaN	NaN	NaN	NaN	NaN
Time (min)		Mass (pg)
0		42.0216	37.6785	35.9726	42.5932	48.985	44.0649	39.144	40.8335	43.4177	44.3939	47.447	39.9298	34.8115	35.3986	38.0774	30.5523	39.9464	42.696	42.7365	46.2605	42.7022	NaN
10		41.3693	40.5723	35.8758	45.6998	52.4495	47.7252	40.3371	42.2386	45.0835	45.4351	49.2943	44.4744	38.2907	37.4125	40.0275	32.0855	40.9522	44.3295	50.8076	44.508	NaN	NaN
20		48.3348	42.4212	41.6574	36.3213	48.4819	55.637	49.507	42.185	43.4784	46.7071	47.7527	51.8768	46.8346	40.7646	39.046	40.9762	34.3583	44.3404	46.3007	53.3597	46.3289	55.4508
30		43.3715	44.0027	37.1904	50.2493	58.5832	51.8138	43.9149	45.1269	48.7691	50.034	54.4163	41.0232	41.8435	35.8046	46.3169	48.5301	48.1892	56.9091	NaN	NaN	NaN	NaN
40		51.9746	49.4365	43.5623	44.529	45.4661	38.7768	52.0992	61.6117	53.3248	45.6124	47.2319	51.466	51.9804	57.2611	42.3358	42.8678	36.5134	48.7028	49.9541	50.2159	57.9098	NaN
50		51.0893	45.6089	46.437	47.4148	40.4844	54.621	64.2848	55.3993	48.2892	49.223	54.1391	54.4643	60.0213	44.8507	44.2976	38.6025	52.1064	52.0807	52.1946	58.733	NaN	NaN
60		55.7227	53.3268	48.3192	48.3779	49.5491	56.5168	67.1755	57.9276	50.8344	50.7284	57.7584	56.9402	62.8279	46.9091	45.7887	40.4411	54.2285	54.1145	55.0443	61.7008	NaN	NaN
70		42.0253	55.4083	50.2127	51.195	52.54	58.905	70.471	60.8579	53.6371	53.5823	61.1508	59.5438	64.6329	50.427	48.0209	41.6351	56.7191	56.8282	55.9135	63.6983	NaN	NaN
80		58.8754	44.4481	57.6317	52.5161	54.526	54.3711	45.9758	62.2526	73.371	62.804	55.2957	55.9944	64.4144	61.8528	67.0943	53.2207	50.9733	43.7766	59.9769	59.5866	58.5414	65.8332
90		60.2576	53.8985	57.6883	47.7341	65.7297	76.3999	66.5023	58.5225	59.1826	67.4677	65.3314	69.5895	63.1283	63.3531	60.9854	68.8678	NaN	NaN	NaN	NaN	NaN	NaN
100		62.7469	57.7061	63.6631	55.6559	56.7413	53.3989	46.9454	61.1609	49.9695	69.891	79.9489	69.9857	61.2425	62.406	71.1502	68.3889	72.1812	66.1736	67.5528	63.9559	72.307	NaN
110		67.567	66.2133	57.6278	59.2575	55.9112	48.8608	64.6296	52.4851	74.3415	82.0719	73.0698	63.7723	65.87	74.8859	72.0573	75.0029	68.8105	70.8972	67.029	74.2677	NaN	NaN
120		69.5494	61.077	69.3718	60.0391	62.8419	59.0449	50.9723	67.4547	53.7908	78.7649	85.6211	76.2909	66.7973	69.443	78.1393	74.6137	78.5083	71.1645	74.4045	72.5557	78.0064	NaN
130		73.5525	64.5203	71.4084	61.87	65.2295	62.1475	53.5632	70.6148	56.0203	82.5418	89.4332	81.0994	71.6377	73.1157	81.5324	77.3486	81.3123	73.8213	78.0133	76.7772	81.9564	NaN
140		76.996	67.6164	75.1817	66.5766	68.4788	64.9671	56.0104	72.961	57.7439	86.7818	93.7463	84.3821	74.9178	76.7351	85.0235	79.5103	84.74	76.8876	81.54	81.7409	85.796	NaN
150		79.832	70.636	78.8158	70.3675	71.2279	68.1514	58.1391	74.7973	59.6326	89.5129	98.0641	89.4408	79.0567	79.2962	88.7953	82.6988	87.8028	78.48	84.3865	86.3937	89.88	NaN
160		83.3495	74.2815	81.5696	73.1443	74.4624	71.8128	61.8954	77.2328	61.4071	92.4211	104.713	93.6562	83.1767	83.5758	90.9303	84.3209	90.4753	82.1664	88.2323	90.041	92.8216	NaN
170		87.7779	77.7078	83.9821	76.4882	76.9586	75.165	64.782	80.0271	64.0468	95.4844	NaN	96.7741	87.4657	86.4962	93.8346	87.4319	93.9938	86.3219	91.9687	93.8769	98.1641	NaN
180		90.9816	80.6645	88.2402	80.5233	79.6212	78.4998	66.7758	84.2169	66.9981	99.3	NaN	99.7869	90.9942	89.6931	96.2164	89.8875	97.7155	90.2835	94.9659	97.1323	102.81	NaN
190		92.9012	82.7589	91.5739	82.8189	80.6341	80.5621	68.3623	88.1387	69.7183	101.179	NaN	103.056	94.8785	92.1788	99.8728	94.3419	101.524	94.5584	NaN	NaN	NaN	NaN
200		96.5652	86.549	95.1493	85.9125	83.6181	83.7817	72.0588	NaN	73.3063	NaN	NaN	NaN	98.6088	95.7819	NaN	98.0293	NaN	NaN	NaN	NaN	NaN	NaN
210		100.512	89.749	100.225	89.9453	NaN	86.962	74.3136	NaN	78.1125	NaN	NaN	102.112	99.5001	NaN	102.578	NaN	NaN	NaN	NaN	NaN	NaN	NaN

## Sheet: Fig4_cut7_cdc16
WT
Time (min)		Volume (µm3)
0		162.7	168.028	143.236	132.212	155.504	184.477	186.107	176.229	158.228	142.312	155.201	148.548	154.35	154.397	149.811	157.96	146.634	167.759	144.852	163.391
5		161.562	171.739	145.585	138.31	165.308	188.777	188.105	165.751	146.15	154.283	154.197	150.708	153.447	155.175	159.306	163.903	149.949	174.29	147.368	162.293
10		164.424	173.379	148.194	140.549	164.007	184.355	185.448	166.982	144.155	158.785	152.221	149.525	154.443	155.655	161.005	163.523	152.998	169.768	146.456	164.114
15		163.92	167.73	145.551	143.227	165.407	NaN	NaN	169.026	NaN	151.165	NaN	NaN	159.224	164.942	NaN	162.82	154.105	171.5	NaN	161.127
Time (min)		Density (mg/ml)
0		260.372	286.691	269.893	264.287	271.49	279.9	270.111	255.142	270.944	262.702	239.975	246.203	263.15	277.613	258.176	257.926	257.652	260.69	259.414	268.079
5		260.14	290.123	265.96	261.082	266.483	296.092	265.693	269.081	270.676	272.881	240.779	250.296	263.224	276.42	256.861	261.549	255.732	268.633	255.98	267.272
10		271.055	293.363	267.043	259.22	273.043	288.675	274.396	279.505	276.762	249.513	251.118	255.54	278.523	287.782	261.526	257.542	268.15	273.063	259.976	278.552
15		284.264	311.063	278.472	269.929	277.466	NaN	NaN	285.913	NaN	276.807	NaN	NaN	252.072	273.931	NaN	266.543	279.832	278.519	NaN	287.494
Time (min)		Mass (pg)
0		42.3625	48.1722	38.6583	34.9419	42.2178	51.6352	50.2695	44.9635	42.8709	37.3857	37.2443	36.5729	40.6174	42.8627	38.6778	40.742	37.7804	43.733	37.5766	43.8016
5		42.0288	49.8254	38.7199	36.1104	44.0517	55.8953	49.9781	44.6004	39.5594	42.101	37.1274	37.7216	40.3909	42.8935	40.9194	42.8688	38.3466	46.8201	37.7232	43.3765
10		44.568	50.8629	39.5741	36.433	44.781	53.2188	50.8862	46.6721	39.8967	39.6188	38.2255	38.2096	43.0158	44.7947	42.1068	42.1141	41.0265	46.3574	38.075	45.7144
15		46.5967	52.1748	40.532	38.6612	45.8949	NaN	NaN	48.3267	NaN	41.8434	NaN	NaN	40.1359	45.1827	NaN	43.3987	43.1234	47.7659	NaN	46.323
cut7
Time (min)		Volume (µm3)
0		179.108	254.062	162.293	171.621	168.976	164.302	191.974	202.679	176.966	201.765	170.932	182.946	210.821	177.055	168.042	190.044	170.593	181.705	182.371	184.118	177.273	197.158	189.788
5		180.325	255.723	167.514	174.405	155.712	169.474	200.856	207.191	176.473	199.927	172.049	184.588	207.851	179.868	170.616	193.858	171.083	186.81	187.107	188.13	180.972	199.638	189.863
10		185.722	263.03	167.467	178.715	159.988	172.842	204.838	208.026	176.628	203.856	176.419	188.193	213.239	180.567	176.595	198.456	177.158	185.634	191.108	188.736	182.622	200.234	196.789
15		188.321	266.43	171.973	181.775	160.818	181.453	195.049	213.502	179.673	207.982	178.095	190.045	225.459	183.285	176.002	202.914	181.173	189.955	190.014	191.784	183.889	204.624	199.711
20		189.057	268.396	173.169	181.503	164.336	183.385	191.969	213.135	178.376	211.754	179.293	188.146	222.823	186.12	179.474	202.413	179.094	192.025	193.963	181.092	183.572	207.092	199.053
25		192.223	274.253	175.926	184.309	167.17	193.838	195.138	214.489	183.177	210.067	181.102	188.507	216.696	188.929	177.704	197.761	NaN	194.588	195.993	191.788	NaN	208.52	201.462
30		192.7	274.974	175.384	182.577	177.749	173.974	NaN	NaN	182.735	204.568	180.924	NaN	227.221	193.63	179.037	NaN	NaN	196.323	199.069	NaN	NaN	213.354	202.92
Time (min)		Density (mg/ml)
0		276.587	268.62	266.208	294.647	264.452	271.293	277.598	288.203	284.344	293.845	247.001	271.612	282.271	264.107	270.576	266.74	263.964	264.343	254.632	272.105	255.329	263.469	255.471
5		266.069	263.888	282.533	281.391	266.468	280.262	284.154	289.829	289.121	288.616	251.497	266.787	288.279	267.762	280.352	270.086	278.103	279.964	254.268	275.642	260.728	257.832	260.98
10		271.167	271.471	274.067	289.957	278.285	279.158	280.304	298.412	281.378	293.547	243.267	278.091	286.517	275.288	285.832	267.743	272.127	266.638	253.901	273.399	266.089	278.972	254.995
15		276.868	267.765	282.654	285.446	277.353	297.126	299.211	306.611	292.175	298.041	251.827	286.39	294.183	276.263	283.039	272.912	286.168	264.854	249.117	274.593	256.031	265.056	257.571
20		275.009	274.408	273.124	289.042	282.983	301.395	307.842	303.969	282.747	292.019	250.186	281.354	301.371	277.244	293.501	285.14	281.226	277.655	248.589	294.685	264.478	274.149	264.04
25		281.566	283.764	288.46	301.364	292.605	293.689	324.767	315.693	304.694	297.827	252.428	297.178	293.057	283.885	296.952	284.188	NaN	279.093	261.525	286.703	NaN	276.724	274.313
30		282.888	283.983	277.767	293.698	289.756	298.561	NaN	NaN	305.181	310.613	267.169	NaN	300.86	292.257	304.707	NaN	NaN	279.959	271.402	NaN	NaN	285.239	267.43
Time (min)		Mass (pg)
0		49.539	68.2459	43.2036	50.5677	44.686	44.5742	53.2916	58.4126	50.319	59.2877	42.2205	49.6902	59.5086	46.7614	45.4682	50.6924	45.0302	48.0324	46.4374	50.0993	45.263	51.9448	48.4854
5		47.979	67.4822	47.3283	49.076	41.4924	47.4971	57.074	60.05	51.022	57.7023	43.2699	49.2458	59.919	48.162	47.8326	52.3584	47.5788	52.3	47.5754	51.8565	47.1844	51.4731	49.5505
10		50.3615	71.4051	45.8973	51.8197	44.5223	48.2503	57.4171	62.0775	49.6992	59.8412	42.9169	52.3347	61.0965	49.708	50.4763	53.1353	48.2095	49.4971	48.5225	51.6001	48.5936	55.8596	50.1803
15		52.14	71.3406	48.6087	51.8869	44.6035	53.9143	58.3606	65.4619	52.496	61.9873	44.849	54.4268	66.326	50.6349	49.8155	55.3776	51.846	50.3103	47.3357	52.6625	47.0812	54.2369	51.4397
20		51.9923	73.6499	47.2966	52.462	46.5042	55.2715	59.0961	64.7863	50.4354	61.8362	44.8567	52.9357	67.1523	51.6007	52.6758	57.716	50.366	53.3167	48.217	53.3649	48.5508	56.7741	52.5578
25		54.1234	77.8232	50.7477	55.5439	48.9147	56.9281	63.3744	67.7127	55.8129	62.5636	45.7153	56.0202	63.5043	53.6341	52.7695	56.2013	NaN	54.3081	51.2571	54.9863	NaN	57.7025	55.2636
30		54.5124	78.0881	48.7159	53.6225	51.504	51.9417	NaN	NaN	55.7672	63.5416	48.3375	NaN	68.3618	56.5897	54.554	NaN	NaN	54.9624	54.0278	NaN	NaN	60.8567	54.267
WT
Time (min)		Volume (µm3)
0		172.913	207.896	141.388	175.096	155.316	152.513	169.912	178.916	178.891	158.869	168.188	193.347	172.378	171.18	174.699	177.646	169.792	177.268	179.522	170.066	165.348	167.632	213.248	161.678	175.276	161.328	144.992	151.438	169.611	167.373	187.852	175.984	164.727	182.572	185.166	189.589	180.759	169.804	163.788	167.261	192.841	180.942	190.019	179.614	180.885	201.118	184.05	193.704
10		163.521	212.732	142.886	179.914	163.348	158.623	159.375	187.314	180.192	163.235	178.908	201.13	174.929	171.686	181.473	189.648	175.972	185.058	187.129	168.921	166.225	171.82	210.327	162.255	180.047	166.482	146.115	151.271	172.903	170.568	194.211	184.428	166.333	188.034	189.646	185.475	189.01	175.793	165.207	167.774	192.786	187.246	198.429	182.927	171.611	199.193	190.653	193.715
20		NaN	NaN	NaN	NaN	NaN	NaN	NaN	NaN	NaN	NaN	NaN	NaN	NaN	NaN	NaN	NaN	NaN	NaN	196.095	NaN	NaN	NaN	NaN	NaN	NaN	NaN	NaN	NaN	NaN	NaN	NaN	NaN	NaN	NaN	NaN	NaN	NaN	NaN	NaN	NaN	NaN	NaN	NaN	NaN	NaN	NaN	NaN	NaN
20		231.616	189.8	152.2	165.4	192.9	160.4	191.1	173.2	202.8	188.7	201.6	205.1	193.8	184.1	197.5	193.7	207.3	199.3	199.7	243.2	172.3	181.8	190.4	161.6	163.2	185.9	187.2	212.1	206.1	192.2	175	183.4	210.4	217.9	193.3	176.1	186.1	208.7	185.3	185.5	182.8	208.3	205	217.7	172.8	176.1	199.2	228
30		239.611	201.3	171	183.1	205.8	180	208	186	212.7	199.8	215.7	225.8	193.4	199.2	201.4	206.3	219.3	217.4	209	255.3	184.8	191.3	207	176.4	178.2	201.4	205.9	231.2	221.2	204.6	189.5	203.2	219.6	231	209	185.1	196.4	216.3	215.5	202.7	204	NaN	209.3	236.5	193	197.6	211.8	241.3
40		255.445	211.5	179.1	198.2	220.7	194.6	222.7	203.3	229.8	216	224	237	208.3	212.6	209.6	219.8	230.8	233.3	218.7	268.1	193	206.7	222.3	192.5	192.5	216.4	224.5	243.3	233.3	212	201.4	218.4	230.7	242.3	217.3	195.8	NaN	233.6	232.5	219.8	223.5	NaN	221.8	251.4	206.8	212.8	220.2	249.6
50		269.416	222.2	193.7	214.2	234.6	210.8	238.3	216.7	248.9	230.7	237.1	250.5	219.3	224	NaN	233.6	243.6	251	231.6	279.5	202.9	221.3	236.1	208	206.1	230.6	239.9	259.5	246.7	223.6	217.9	237.1	241.4	256.9	231	208.2	NaN	249.4	251.6	237	NaN	NaN	235.7	268.3	214.1	221.7	NaN	NaN
60		281.849	235.5	207	225	251.8	225.6	249.2	233	268.8	249	250.3	264	233.3	NaN	NaN	248.2	257	266.4	243.3	296.2	210.8	236.2	NaN	217.9	213	244.2	254.8	276.3	259.6	235.8	230.4	248.9	256.5	272.3	244.2	NaN	NaN	269.6	261.7	NaN	NaN	NaN	251.9	286.2	NaN	NaN	NaN	NaN
70		301.877	248.3	221.6	237.2	263.6	243.3	263.9	240.1	289.7	260.7	265.2	275.6	253.3	NaN	NaN	262.9	272.6	282.7	256.7	305.2	221.8	NaN	NaN	231.7	225.1	260.1	270.5	292.3	274.2	249	243.9	261.8	270.3	288.4	259.3	NaN	NaN	281.7	276.8	NaN	NaN	NaN	267.3	300.7	NaN	NaN	NaN	NaN
80		314.59	263.7	239.8	250.3	278.5	261	266.8	NaN	312.6	278.8	280.2	289.7	264.6	NaN	NaN	279.7	287.1	300.3	267.5	317.7	NaN	NaN	NaN	242.6	235.4	275.4	282.8	312.9	289.9	266.9	257.5	274.1	286.2	301.9	279.8	NaN	NaN	298.8	293.1	NaN	NaN	NaN	284.8	314	NaN	NaN	NaN	NaN
90		331.661	279.4	253.5	263	297.4	275.2	NaN	NaN	323.6	295.5	301.1	309.9	276.8	NaN	NaN	292.8	301.8	314.9	287.5	332.5	NaN	NaN	NaN	257	247.3	293.7	299	334.5	NaN	277.3	271.4	286.6	301	317.5	294.4	NaN	NaN	315.6	311.1	NaN	NaN	NaN	304.4	325.1	NaN	NaN	NaN	NaN
100		351.371	293.8	269.6	277.5	311.9	291.9	NaN	NaN	338.5	313.3	313.3	322.7	289.9	NaN	NaN	308.4	315.9	330.2	298.5	346.4	NaN	NaN	NaN	273.5	263.8	315.1	313.4	NaN	NaN	295	282.1	297	316.6	329.3	307.5	NaN	NaN	330.5	327.6	NaN	NaN	NaN	318.8	332.5	NaN	NaN	NaN	NaN
Time (min)		Density (mg/ml)
0		274.784	293.339	302.725	232.346	261.43	277.717	259.617	291.135	336.686	333.887	322.398	298.251	267.277	290.233	295.891	289.531	306.221	287.418	272.471	289.446	283.839	302.553	286.089	260.371	288.619	308.5	357.933	324.321	297.717	285.606	291.705	297.987	303.452	289.401	288.038	291.327	298.871	282.326	298.957	295.292	278.221	277.134	276.148	294.089	276.807	292.464	287.484	323.553
10		284.307	303.155	327.887	251.34	276.564	307.569	271.953	309.106	316.926	335.85	323.467	330.243	285.282	298.643	325.332	302.425	303.058	301.322	278.015	302.481	292.948	289.212	298.375	303.106	253.796	292.673	373.5	348.921	318.065	308.311	329.758	306.951	326.827	302.573	296.591	307.439	315.126	290.328	325.239	299.195	283.701	287.806	276.846	307.985	285.418	316.279	304.841	307.102
20		NaN	NaN	NaN	NaN	NaN	NaN	NaN	NaN	NaN	NaN	NaN	NaN	NaN	NaN	NaN	NaN	NaN	NaN	283.551	NaN	NaN	NaN	NaN	NaN	NaN	NaN	NaN	NaN	NaN	NaN	NaN	NaN	NaN	NaN	NaN	NaN	NaN	NaN	NaN	NaN	NaN	NaN	NaN	NaN	NaN	NaN	NaN	NaN
20		261.12	272.4	306.1	285	260.3	261.3	280.1	248.2	307.8	307.1	290.6	301.9	276.8	298.5	278.1	293.7	279.9	273	283.7	287.6	299	231.7	279.1	340.6	322.2	299.4	278.9	299.7	294.3	285.9	281.3	283.3	291.1	285.6	262.4	277.1	277.5	284.4	268.9	290	267	271.8	285.3	303.8	279.8	284.4	304.2	290
30		279.007	281.2	273.7	297.8	259.9	280.2	297.5	261.4	302.6	303.9	288.3	308.3	273.3	291.3	283.8	289.2	295.4	279.4	286.7	309.7	259.5	272.8	267.7	313.6	295.1	295	277.8	296.1	280.7	281.6	286.6	279	296.8	290	276.7	290.5	269.6	276.7	276.7	280.4	269	NaN	292.4	296.3	280.8	283.4	295.7	291.6
40		282.62	284.4	259.6	302.2	256.8	262.9	295	272.1	301.8	315.2	288.2	319.5	272.8	289.8	285.1	284.8	274.8	267.3	292.6	276.1	293.6	264.9	277.3	305	300.3	285.7	284.6	292.1	302.6	287.6	292.6	283.3	298.1	291	279.2	279.4	NaN	281.3	271.6	283.3	275.6	NaN	301.1	303.4	275.8	267.5	302.4	295.7
50		285.012	259.4	266.7	296.2	250.2	266.3	285.8	270.7	293.6	301.5	285.5	301.3	268.7	283.1	NaN	279.5	283.3	269.4	285	251	285	275.7	277.1	289.6	296.7	287.4	268.9	292.8	287.3	279.4	297.1	281	285.9	291.5	270.6	283.6	NaN	274.8	276.7	289.8	NaN	NaN	297.7	292.5	286.1	274.5	NaN	NaN
60		268.128	274.6	247.5	296.2	244.7	257.5	283.3	267.9	276.6	296.5	272.4	281.2	268.4	NaN	NaN	271.5	274	257.9	291.8	294.8	287.4	285	NaN	286.9	282.2	279.5	274.3	289.7	277.1	273.5	275.2	276.1	284.9	290.2	271.5	NaN	NaN	271	266.5	NaN	NaN	NaN	292.3	292.7	NaN	NaN	NaN	NaN
70		274.582	267.1	246.6	292.6	250.2	254.1	287.9	266.1	275.9	294.9	267.1	289.2	258.5	NaN	NaN	271.1	282.3	251.4	268.6	282.8	285.1	NaN	NaN	275.3	269.9	282.4	271.4	291.9	274	262.6	253	254.4	282.5	290.2	263.7	NaN	NaN	271	274.8	NaN	NaN	NaN	295.5	300.8	NaN	NaN	NaN	NaN
80		255.912	273.6	240	282.3	251.1	258.7	286.1	NaN	277.3	292.6	260.5	271.7	247.3	NaN	NaN	271.8	271.4	259.2	245.3	278.4	NaN	NaN	NaN	284.5	275.5	271.1	264.9	282.1	288.2	277	270.8	260.4	274.8	283.6	251.3	NaN	NaN	264.7	273.2	NaN	NaN	NaN	280.4	287.3	NaN	NaN	NaN	NaN
90		267.705	273.5	240.6	279.8	255.1	263	NaN	NaN	271.9	273.7	266	270.3	251.8	NaN	NaN	270.6	266.5	251.3	278.1	306.6	NaN	NaN	NaN	275.4	276.7	267.9	270.7	296.2	NaN	264.5	272.9	263.1	279.9	295.3	250.9	NaN	NaN	274.6	260.6	NaN	NaN	NaN	280.2	293.8	NaN	NaN	NaN	NaN
100		268.116	268.8	244.7	277.3	263.9	262.1	NaN	NaN	275.5	280.4	260.2	268.9	262.9	NaN	NaN	250.4	278	251.6	268.1	289.9	NaN	NaN	NaN	284.7	276.4	280.7	279	NaN	NaN	245.1	270.6	262.9	281.5	294.8	250.5	NaN	NaN	257.8	262	NaN	NaN	NaN	287.8	306.5	NaN	NaN	NaN	NaN
Time (min)		Mass (pg)
0		46.2492	60.9487	43.558	41.7124	40.3058	43.5724	44.748	52.4764	58.1521	52.0241	52.7277	59.1584	47.1542	50.0482	52.7332	52.4578	50.9361	51.277	48.3234	49.7688	47.1775	48.5988	60.3706	43.9681	46.5168	46.6111	51.9978	48.1279	50.7922	47.9241	57.0203	52.0683	51.0295	50.6942	51.3254	55.7921	55.001	47.3759	49.8376	49.5383	53.7544	49.8742	52.4217	52.7321	49.7959	59.4088	52.1664	60.1005
10		46.4901	64.4908	46.8503	45.2197	45.1763	48.7876	43.3427	57.8998	57.1076	54.8224	57.8709	66.4217	49.9042	51.2728	59.0392	57.3544	53.3298	55.7619	52.0519	51.0952	48.6951	49.6923	62.7562	49.1804	45.6951	48.7249	54.5738	52.7817	54.9944	52.5879	64.0426	56.6102	54.3622	56.8941	56.2473	57.022	59.5619	51.0377	53.7318	50.1972	54.6935	53.8904	54.9343	56.3386	48.9808	63.0007	58.1189	59.4903
20		NaN	NaN	NaN	NaN	NaN	NaN	NaN	NaN	NaN	NaN	NaN	NaN	NaN	NaN	NaN	NaN	NaN	NaN	55.603	NaN	NaN	NaN	NaN	NaN	NaN	NaN	NaN	NaN	NaN	NaN	NaN	NaN	NaN	NaN	NaN	NaN	NaN	NaN	NaN	NaN	NaN	NaN	NaN	NaN	NaN	NaN	NaN	NaN
20		60.9533	51.7	46.6	47.2	50.2	42.1	53.8	43.4	62.8	57.8	58.7	61.8	53.9	55.1	54.8	56.9	58	54.5	56.7	70	51.6	42.2	53.1	55	52.6	56.2	52.2	63.6	60.7	55	49.3	51.9	61.6	62.1	50.7	48.9	51.8	59.8	49.9	53.8	48.9	56.6	58.7	66.5	48.5	50.2	60.6	66.1
30		66.0844	56.3	47.5	54.2	53.3	48.4	60.9	48.7	64.9	61.6	62.5	70	53.1	58.5	56.8	59.7	62.1	59.4	60.2	74.3	52.4	49.2	56.9	56.2	54.4	59.4	57.8	68.4	64.8	58.3	54.4	57.2	65.2	66.6	57.1	52.4	53	61.1	58.8	57.7	55.5	NaN	61.6	71.6	53.9	55	63.7	70.6
40		70.659	58.1	48.2	58.8	56	51.7	64.4	54	68.2	65.7	64	71.6	56.7	61.3	59.7	62.3	64.9	62.8	63	76	55	55.3	61	58.7	57.5	62.8	62.1	71.5	67.3	59.6	57.7	61.1	67.5	70.1	59.2	55.8	NaN	65.1	63.4	62.7	61.9	NaN	65.3	75.1	58.2	58.6	66.5	73.8
50		75.1113	60.8	50	63.7	59.1	55.5	69.2	58.1	72.3	69.5	66.5	75	58.8	63.4	NaN	65.1	68.6	66.3	65.9	79	57.3	61.1	65.4	60.9	59.4	66.2	66	75.9	70.2	61.8	60.9	64.8	70.2	74.6	62.8	59	NaN	68.8	68.8	68.8	NaN	NaN	69.8	79.9	61.4	60.9	NaN	NaN
60		77.1179	64.1	52	66.2	63.1	58.5	71.8	62.5	76.8	74.5	68.8	77	61.2	NaN	NaN	68.3	71.2	69.4	66.9	82.1	60.2	67.4	NaN	62.6	60.6	68.9	69.4	80	74.2	65	63.7	67.1	73.4	78.6	65.1	NaN	NaN	73.7	71.4	NaN	NaN	NaN	73.8	84.7	NaN	NaN	NaN	NaN
70		81.8313	67.1	54.8	68.7	66	63.2	75.6	63.9	81.3	75.9	71.7	77.7	65.4	NaN	NaN	71.6	75	72.8	70	86.5	63.3	NaN	NaN	65.3	63	72.4	73	84.9	76.8	67.5	66.6	69.7	76.4	83.6	67.6	NaN	NaN	76.7	74.8	NaN	NaN	NaN	77.2	88.4	NaN	NaN	NaN	NaN
80		84.3541	71.7	58.4	71.5	70.6	67.7	76.5	NaN	86.8	80.1	74.4	79.8	68.2	NaN	NaN	74.5	78.8	76.3	72.2	92.3	NaN	NaN	NaN	68.3	65	76.4	76.9	90.8	83.6	70.5	69.1	72.1	80.7	87.8	71.9	NaN	NaN	80.2	78.3	NaN	NaN	NaN	81.8	93.1	NaN	NaN	NaN	NaN
90		89.0695	76	61.7	73.6	76.3	71.8	NaN	NaN	90.4	83.2	79.3	84.8	71	NaN	NaN	77.4	83.4	81	76.5	96.9	NaN	NaN	NaN	72.5	68.1	80.7	81.3	99.1	NaN	72.6	72.9	75	84.4	93.6	74.3	NaN	NaN	84.5	83.1	NaN	NaN	NaN	86.8	97.9	NaN	NaN	NaN	NaN
100		94.9534	79	65.7	76.2	81.6	76.9	NaN	NaN	96.2	86.7	83	87.6	74.8	NaN	NaN	81.7	87.6	85.4	78.6	100.4	NaN	NaN	NaN	76.5	72.2	88.9	87.4	NaN	NaN	76.9	76.9	78.5	88.4	98.8	77.9	NaN	NaN	88.5	88	NaN	NaN	NaN	90.4	101.6	NaN	NaN	NaN	NaN
cdc16
Time (min)		Density (mg/ml)
0		238.384	201.772	209.925	205.397	264.292	238.341	232.548	242.693	234.981	232.198	266.517	238.98	226.793	230.608	246.953	225.835	311.709	237.34
10		239.703	212.596	205.415	216.007	272.135	254.226	245.921	249.898	243.81	241.782	265.502	224.844	239.751	249.57	240.459	226.467	328.272	225.953
20		267.798	218.563	216.993	262.695	286.021	262.089	239.48	256.711	250.353	250.029	289.192	231.505	238.372	268.565	236.748	258.629	334.82	224.209
30		254.392	266.199	233.01	245.611	285.662	262.386	243.275	262.236	253.356	249.205	270.768	233.492	248.725	251.369	252.803	252.247	328.407	239.971
40		250.365	242.275	237.355	238.22	283.321	264.044	251.154	260.367	263.149	248.947	299.292	244.234	257.966	262.962	231.518	246.496	328.661	225.41
50		263.82	243.149	263.244	252.779	293.608	273.517	254.307	259.323	268.109	257.247	299.216	252.826	276.441	269.362	215.43	255.919	342.727	245.032
60		276.687	259.497	255.296	254.186	307.983	283.568	265.668	267.785	270.188	265.563	309.162	265.244	269.534	279.381	275.053	260.329	328.195	257.357
70		275.567	260.204	256.884	259.643	306.563	291.297	279.927	271.353	284.194	270.608	286.309	254.691	270.245	271.278	266.164	266.962	327.694	254.808
80		293.347	275.988	260.332	283.7	321.545	294.951	258.225	274.215	300.612	280.105	283.055	275.629	275.26	288.437	285.274	287.004	326.174	263.972
90		292.781	290.372	269.154	283.125	321.916	305.169	279.64	291.557	273.812	295.241	321.493	280.411	265.586	294.792	295.374	286.889	324.171	276.316
100		303.59	287.256	281.83	281.174	315.071	291.777	292.765	315.693	296.624	280.669	332.226	293.091	287.306	306.06	306.105	293.243	314.764	262.982
Time (min)		Volume (µm3)
0		182.237	173.497	157.194	150.895	154.873	178.769	197.737	190.199	172.923	194.462	196.666	193.067	195.989	186.106	201.219	176.143	165.206	194.563
10		180.182	173.289	154.044	156.173	162.56	175.01	197.536	191.376	175.025	193.642	198.724	194.738	198.156	188.546	207.579	179.091	166.232	202.551
20		184.362	182.283	156.342	161.676	170.777	178.226	207.027	198.29	181.684	196.844	204.559	200.691	205.379	194.75	218.064	182.963	169.806	210.615
30		188.416	189.072	160.356	167.631	179.358	182.94	214.286	204.378	189.422	201.975	211.18	206.256	210.339	200.388	227.169	188.169	172.92	217.921
40		194.009	198.426	165.596	173.435	186.338	190.058	224.304	212.912	197.244	209.902	213.871	211.099	216.403	207.185	232.925	194.912	178.48	223.177
50		200.603	207.505	171.83	177.39	193.496	196.745	230.972	222.019	204.252	217.347	222.381	217.775	221.829	214.167	241.378	200.909	185.921	229.518
60		206.75	214.373	178.119	184.133	200.585	203.778	237.526	230.381	209.962	225.866	228.83	224.29	228.516	219.735	245.573	206.115	194.362	235.652
70		213.192	221.822	185.044	192.53	204.937	209.376	244.19	236.469	213.372	233.578	232.74	230.281	233.151	225.695	248.783	215.902	201.575	241.413
80		217.84	232.527	191.266	201.237	211.324	212.778	250.006	242.53	216.786	239.338	234.214	236.319	238.743	231.81	252.85	225.735	209.165	247.94
90		222.522	242.653	198.812	211.604	221.537	216.693	253.622	246.986	221.786	245.058	239.235	244.407	244.23	239.442	264.039	235.336	213.692	258.105
100		227.023	255.767	207.85	224.192	226.211	221.019	260.834	252.402	224.29	252.297	242.028	250.806	254.159	246.316	268.797	249.482	217.817	265.451
Time (min)		Mass (pg)
0		43.4424	35.0069	32.9989	30.9934	40.9316	42.6079	45.9834	46.16	40.6336	45.1535	52.4149	46.1392	44.449	42.9176	49.6917	39.7793	51.4962	46.1775
10		44.7846	36.561	32.4739	35.7718	44.6189	44.0038	47.26	47.8059	42.5511	46.7395	54.3807	45.131	46.568	47.0852	50.084	42.4879	54.0187	46.3836
20		46.1121	41.8354	34.5189	37.9017	47.6043	45.6762	50.2442	50.4909	45.3435	48.1335	56.9384	47.1157	49.8559	49.2471	52.6695	44.3225	55.4311	48.5551
30		48.1086	44.9219	37.2518	40.8371	51.032	48.2233	52.9509	52.7023	48.564	50.4279	60.2056	49.0573	53.1731	52.2084	53.3623	46.7145	57.5232	50.6446
40		50.9839	48.964	40.0946	43.4762	54.3512	51.2479	56.3682	55.6707	51.5984	53.434	62.8095	51.9172	55.9683	55.2343	56.3751	49.6732	59.3453	53.2738
50		53.0789	52.7772	42.9253	44.4022	57.2426	54.217	59.8806	58.7071	54.7917	56.2595	65.1326	54.5272	58.7325	57.2317	59.8892	51.5798	61.5476	56.1739
60		56.3364	55.0516	45.4189	47.5857	60.7839	57.4545	62.2186	61.4869	58.2575	59.8561	67.4866	58.055	61.7079	60.3327	62.5632	54.3861	64.2253	58.8557
70		59.8733	59.1191	48.3184	51.5178	63.6542	60.7053	65.3733	64.5973	59.6141	64.0537	69.6827	61.2813	63.2722	63.4041	66.578	58.7191	66.4004	62.7288
80		62.8953	64.0241	50.731	54.992	66.5158	62.4368	68.8763	68.998	61.8334	66.7014	71.6893	64.8298	65.3585	66.8483	72.2975	63.1115	67.7787	65.275
90		66.2503	68.4186	54.2867	59.1223	69.6925	65.1516	72.2394	71.6573	64.6978	70.1644	74.9328	68.5618	68.2577	69.9073	75.8011	67.4572	69.4886	68.973
100		69.774	74.5276	58.3598	63.5701	71.7267	68.4913	76.4259	74.9403	66.575	74.1869	78.4652	73.457	73.0632	73.4568	80.067	72.8863	71.4181	72.9737
[truncated: 7 more columns]

## Sheet: Fig5B_LatA
WT control DMSO
Time (min)		Volume (normalized)
0		1	1	1	1	1	1	1	1	1	1	1	1	1	1	1	1	1	1	1	1	1	1	1	1	1	1	1	1	1	1	1	1	1	1	1	1	1	1	1	1	1	1	1	1	1
5		1.05087	1.05778	1.01991	1.02028	NaN	NaN	1.01475	1.00275	1.01255	1.01116	0.983717	1.04578	1.03773	1.00889	1.02385	1.01865	1.01846	1.0186	1.18339	1.15592	1.02664	NaN	NaN	1.03256	1.04283	1.02545	1.0137	1.03856	1.02721	1.01963	1.08493	1.07331	1.07276	1.01815	1.02898	0.945082	1.04495	1.05087	NaN	1.02763	1.03367	0.974992	1.06136	1.05623	1.06469
10		1.09168	1.09843	NaN	NaN	NaN	NaN	1.03987	1.02524	1.02708	1.02973	0.978127	1.0889	1.07517	1.02797	1.05567	1.04888	1.0314	1.0532	NaN	NaN	1.05298	NaN	NaN	1.04167	1.05357	1.0266	1.0227	1.07525	1.05864	1.01889	1.13285	1.11358	1.10408	NaN	NaN	NaN	1.09568	1.10939	NaN	1.02907	1.04458	0.967998	1.10248	1.0952	1.08779
15		1.11892	1.13362	NaN	NaN	NaN	NaN	1.06879	1.04769	1.03739	1.03826	0.970094	1.13218	1.11152	1.05722	1.08123	1.07224	1.03881	1.08314	NaN	NaN	1.08575	NaN	NaN	1.04566	1.03222	1.00345	1.01926	1.11009	1.09429	1.03314	1.19804	1.1748	1.14336	NaN	NaN	NaN	1.14412	1.15905	NaN	1.0413	1.06082	0.959372	1.14966	1.14025	1.11826
20		1.13609	1.14998	NaN	NaN	NaN	NaN	1.10383	1.08279	1.04793	1.04846	0.96644	1.17413	1.1479	NaN	1.1049	1.09958	NaN	1.10893	NaN	NaN	1.10936	NaN	NaN	1.03439	NaN	NaN	1.00853	NaN	NaN	1.08734	1.25795	1.23167	1.15253	NaN	NaN	NaN	1.18726	1.20884	NaN	1.04947	1.07502	0.957294	1.19608	1.17979	1.12998
25		1.13624	1.15883	NaN	NaN	NaN	NaN	1.13995	1.11936	1.05399	1.0573	0.959836	1.21935	1.18772	NaN	1.13925	1.13614	NaN	1.12176	NaN	NaN	1.12978	NaN	NaN	1.02234	NaN	NaN	0.997722	NaN	NaN	NaN	1.26653	1.24381	1.16182	NaN	NaN	NaN	1.23704	1.26632	NaN	1.05918	1.09053	0.956866	1.24497	1.22448	1.15187
30		1.12271	1.15601	NaN	NaN	NaN	NaN	1.18173	1.16031	1.06015	1.06321	NaN	1.26321	1.22532	NaN	1.17183	1.17159	NaN	1.12504	NaN	NaN	1.14424	NaN	NaN	1.01128	NaN	NaN	0.981848	NaN	NaN	NaN	1.32159	1.29582	1.15862	NaN	NaN	NaN	1.28452	1.31932	NaN	1.0728	1.10763	NaN	1.29884	1.2717	1.18377
35		1.10966	1.14895	NaN	NaN	NaN	NaN	1.2204	1.19527	1.06516	1.07174	NaN	1.31898	1.28347	NaN	1.20874	1.2073	NaN	1.11931	NaN	NaN	1.14223	NaN	NaN	1.00433	NaN	NaN	0.982376	NaN	NaN	NaN	1.32916	1.30723	1.14917	NaN	NaN	NaN	1.33224	1.36848	NaN	1.09189	1.12948	NaN	1.35447	1.32444	1.21273
40		1.10542	1.13789	NaN	NaN	NaN	NaN	1.25673	1.2309	1.07756	1.08792	NaN	NaN	NaN	NaN	1.25635	1.25429	NaN	1.11314	NaN	NaN	1.13196	NaN	NaN	1.0139	NaN	NaN	0.985166	NaN	NaN	NaN	1.39021	1.3567	1.13328	NaN	NaN	NaN	1.37376	1.41623	NaN	1.1033	1.14833	NaN	NaN	NaN	1.2257
45		1.10959	1.13541	NaN	NaN	NaN	NaN	1.2866	1.26102	1.09169	1.10563	NaN	NaN	NaN	NaN	1.30901	1.29599	NaN	1.11038	NaN	NaN	1.12436	NaN	NaN	0.993403	NaN	NaN	1.01471	NaN	NaN	NaN	NaN	NaN	1.12791	NaN	NaN	NaN	1.41515	1.45986	NaN	1.12206	1.16819	NaN	NaN	NaN	1.23351
50		1.12236	1.14686	NaN	NaN	NaN	NaN	1.31724	1.28837	1.10709	1.11847	NaN	NaN	NaN	NaN	NaN	NaN	NaN	1.11145	NaN	NaN	1.11751	NaN	NaN	NaN	NaN	NaN	NaN	NaN	NaN	NaN	NaN	NaN	1.1217	NaN	NaN	NaN	1.4504	1.49429	NaN	1.14505	1.18828	NaN	NaN	NaN	1.22915
55		1.15567	1.15497	NaN	NaN	NaN	NaN	1.34849	1.31825	1.12328	1.13512	NaN	NaN	NaN	NaN	NaN	NaN	NaN	1.11901	NaN	NaN	1.11346	NaN	NaN	NaN	NaN	NaN	NaN	NaN	NaN	NaN	NaN	NaN	1.13524	NaN	NaN	NaN	1.47211	1.52541	NaN	1.16642	1.20824	NaN	NaN	NaN	1.20596
60		NaN	1.21298	NaN	NaN	NaN	NaN	1.37368	1.34882	1.14008	1.14828	NaN	NaN	NaN	NaN	NaN	NaN	NaN	NaN	NaN	NaN	1.12343	NaN	NaN	NaN	NaN	NaN	NaN	NaN	NaN	NaN	NaN	NaN	NaN	NaN	NaN	NaN	NaN	NaN	NaN	1.20557	1.23618	NaN	NaN	NaN	1.1838
65		NaN	NaN	NaN	NaN	NaN	NaN	1.41843	1.39247	1.15198	1.16338	NaN	NaN	NaN	NaN	NaN	NaN	NaN	NaN	NaN	NaN	NaN	NaN	NaN	NaN	NaN	NaN	NaN	NaN	NaN	NaN	NaN	NaN	NaN	NaN	NaN	NaN	NaN	NaN	NaN	NaN	NaN	NaN	NaN	NaN	1.17203
Time (min)		Density (normalized)
0		1	1	1	1	1	1	1	1	1	1	1	1	1	1	1	1	1	1	1	1	1	1	1	1	1	1	1	1	1	1	1	1	1	1	1	1	1	1	1	1	1	1	1	1	1
5		0.94735	0.98558	1.06139	1.0596	NaN	NaN	1.05463	1.0169	1.02496	1.03842	1.02256	1.00982	1.00147	1.01588	1.0345	1.02952	0.982996	1.0161	0.92651	0.878153	0.999076	NaN	NaN	0.997196	1.00919	0.994555	1.02118	1.00748	1.02221	0.986893	0.990422	0.961174	0.973662	1.0286	1.02154	1.05947	1.00169	1.02032	NaN	0.989787	1.0307	1.05552	0.967412	0.968291	0.965513
10		0.943715	0.988985	NaN	NaN	NaN	NaN	1.05561	1.01762	1.02387	1.04572	1.03214	1.01184	0.99844	1.01995	1.0356	1.02173	0.98062	1.0222	NaN	NaN	0.99454	NaN	NaN	0.999983	1.03842	1.0139	1.03222	1.02476	1.03339	1.01177	0.982115	0.958597	0.976345	NaN	NaN	NaN	0.971508	1.02076	NaN	0.990005	1.06891	1.07359	0.960623	0.955486	0.966605
15		0.939539	0.979575	NaN	NaN	NaN	NaN	1.06687	1.0205	1.03683	1.05966	1.05304	1.01059	0.991999	1.01222	1.05002	1.01909	0.99287	1.02036	NaN	NaN	0.980534	NaN	NaN	1.01193	1.08769	1.05804	1.05616	1.05183	1.03352	1.01918	0.963113	0.929276	0.968395	NaN	NaN	NaN	0.961667	1.01322	NaN	1.00017	1.0909	1.11037	0.939725	0.942475	0.962201
20		0.955468	0.986874	NaN	NaN	NaN	NaN	1.05187	1.0268	1.04005	1.06769	1.06584	0.995554	0.98474	NaN	1.05389	1.01698	NaN	1.02543	NaN	NaN	0.984625	NaN	NaN	1.03708	NaN	NaN	1.07727	NaN	NaN	0.993115	0.939496	0.906609	0.987702	NaN	NaN	NaN	0.946465	1.01311	NaN	1.01241	1.10649	1.12844	0.933137	0.936027	0.970082
25		0.969673	0.988345	NaN	NaN	NaN	NaN	1.0368	1.02389	1.03793	1.0724	1.10448	0.986547	0.971071	NaN	1.04777	0.999402	NaN	1.03925	NaN	NaN	0.99402	NaN	NaN	1.05426	NaN	NaN	1.10482	NaN	NaN	NaN	0.937919	0.91884	1.00232	NaN	NaN	NaN	0.92517	0.990186	NaN	1.01797	1.11081	1.18393	0.917619	0.916279	0.974115
30		1.00192	0.997919	NaN	NaN	NaN	NaN	1.01297	1.02261	1.04049	1.07382	NaN	0.967671	0.955852	NaN	1.03842	0.981588	NaN	1.05668	NaN	NaN	1.00955	NaN	NaN	1.08784	NaN	NaN	1.13003	NaN	NaN	NaN	0.922528	0.895634	1.02002	NaN	NaN	NaN	0.919316	0.959928	NaN	1.03269	1.11242	NaN	0.895739	0.902944	0.968042
35		1.01837	1.01302	NaN	NaN	NaN	NaN	0.999927	1.01883	1.04603	1.08337	NaN	0.944389	0.942776	NaN	1.03897	0.969308	NaN	1.07695	NaN	NaN	1.04054	NaN	NaN	1.1099	NaN	NaN	1.14624	NaN	NaN	NaN	0.92431	0.905876	1.04385	NaN	NaN	NaN	0.92299	0.942765	NaN	1.04227	1.11085	NaN	0.886522	0.865115	0.963777
40		1.03608	1.03085	NaN	NaN	NaN	NaN	0.985497	1.01773	1.04347	1.08113	NaN	NaN	NaN	NaN	1.02166	0.944663	NaN	1.10046	NaN	NaN	1.07669	NaN	NaN	1.12052	NaN	NaN	1.15897	NaN	NaN	NaN	0.92763	0.886289	1.06667	NaN	NaN	NaN	0.916449	0.931619	NaN	1.03873	1.12306	NaN	NaN	NaN	0.967718
45		1.0549	1.04333	NaN	NaN	NaN	NaN	0.978282	1.01632	1.04537	1.0806	NaN	NaN	NaN	NaN	1.00963	0.934927	NaN	1.11851	NaN	NaN	1.1012	NaN	NaN	1.14259	NaN	NaN	1.13755	NaN	NaN	NaN	NaN	NaN	1.0802	NaN	NaN	NaN	0.919555	0.918395	NaN	1.03947	1.1158	NaN	NaN	NaN	0.969912
50		1.06711	1.0576	NaN	NaN	NaN	NaN	0.983128	1.01977	1.0577	1.0715	NaN	NaN	NaN	NaN	NaN	NaN	NaN	1.12714	NaN	NaN	1.12676	NaN	NaN	NaN	NaN	NaN	NaN	NaN	NaN	NaN	NaN	NaN	1.09132	NaN	NaN	NaN	0.931283	0.919914	NaN	1.0475	1.12162	NaN	NaN	NaN	0.984299
55		1.07734	1.05882	NaN	NaN	NaN	NaN	0.988649	1.01496	1.05759	1.07767	NaN	NaN	NaN	NaN	NaN	NaN	NaN	1.14134	NaN	NaN	1.14191	NaN	NaN	NaN	NaN	NaN	NaN	NaN	NaN	NaN	NaN	NaN	1.09702	NaN	NaN	NaN	0.946241	0.936605	NaN	1.04512	1.1185	NaN	NaN	NaN	1.00986
60		NaN	1.0611	NaN	NaN	NaN	NaN	0.992712	1.0239	1.06689	1.0776	NaN	NaN	NaN	NaN	NaN	NaN	NaN	NaN	NaN	NaN	1.16597	NaN	NaN	NaN	NaN	NaN	NaN	NaN	NaN	NaN	NaN	NaN	NaN	NaN	NaN	NaN	NaN	NaN	NaN	1.06206	1.10786	NaN	NaN	NaN	1.03516
65		NaN	NaN	NaN	NaN	NaN	NaN	0.976405	0.993806	1.04914	1.102	NaN	NaN	NaN	NaN	NaN	NaN	NaN	NaN	NaN	NaN	NaN	NaN	NaN	NaN	NaN	NaN	NaN	NaN	NaN	NaN	NaN	NaN	NaN	NaN	NaN	NaN	NaN	NaN	NaN	NaN	NaN	NaN	NaN	NaN	1.06645
Time (min)		Mass (normalized)
0		1	1	1	1	1	1	1	1	1	1	1	1	1	1	1	1	1	1	1	1	1	1	1	1	1	1	1	1	1	1	1	1	1	1	1	1	1	1	1	1	1	1	1	1	1
5		0.994519	1.04217	1.08252	1.08109	NaN	NaN	1.07043	1.01988	1.03795	1.05021	1.00531	1.05587	1.03945	1.02506	1.05965	1.04903	1.00105	1.03513	1.09642	1.01507	1.0256	NaN	NaN	1.02947	1.05254	1.01987	1.0353	1.04653	1.05041	1.00565	1.07167	1.02771	1.04342	1.04726	1.05114	1.00128	1.04671	1.07307	NaN	1.017	1.06598	1.02817	1.02593	1.02197	1.02675
10		1.02952	1.08629	NaN	NaN	NaN	NaN	1.09777	1.04339	1.0516	1.07712	1.00911	1.10183	1.07342	1.04844	1.09333	1.07138	1.01152	1.07696	NaN	NaN	1.04679	NaN	NaN	1.04127	1.09346	1.04043	1.0558	1.1024	1.09407	1.02893	1.10901	1.06349	1.07745	NaN	NaN	NaN	1.06204	1.13276	NaN	1.01871	1.11755	1.03848	1.05804	1.04525	1.05077
15		1.05202	1.11042	NaN	NaN	NaN	NaN	1.13958	1.06904	1.07553	1.10018	1.02114	1.14359	1.10216	1.07014	1.13516	1.0918	1.0314	1.10479	NaN	NaN	1.06327	NaN	NaN	1.05744	1.12273	1.06169	1.07589	1.16763	1.13097	1.04944	1.14901	1.08641	1.10721	NaN	NaN	NaN	1.09826	1.17301	NaN	1.04173	1.15756	1.06505	1.0794	1.07435	1.07617
20		1.08561	1.1347	NaN	NaN	NaN	NaN	1.1604	1.11185	1.08993	1.11942	1.02991	1.16837	1.1295	NaN	1.16418	1.11768	NaN	1.13698	NaN	NaN	1.09169	NaN	NaN	1.07029	NaN	NaN	1.0854	NaN	NaN	1.07985	1.17903	1.11296	1.13821	NaN	NaN	NaN	1.12245	1.22281	NaN	1.06294	1.18962	1.08025	1.11434	1.1034	1.09641
25		1.10144	1.1451	NaN	NaN	NaN	NaN	1.18048	1.14639	1.09393	1.13384	1.06012	1.20123	1.15222	NaN	1.19332	1.13474	NaN	1.16552	NaN	NaN	1.12281	NaN	NaN	1.07592	NaN	NaN	1.10066	NaN	NaN	NaN	1.18512	1.13896	1.16418	NaN	NaN	NaN	1.14374	1.25194	NaN	1.07866	1.21093	1.13286	1.14046	1.12032	1.12217
30		1.12394	1.15315	NaN	NaN	NaN	NaN	1.19502	1.18674	1.10307	1.14165	NaN	1.22154	1.17079	NaN	1.21647	1.14879	NaN	1.18811	NaN	NaN	1.15497	NaN	NaN	1.09962	NaN	NaN	1.10888	NaN	NaN	NaN	1.21903	1.15961	1.18098	NaN	NaN	NaN	1.1803	1.26367	NaN	1.10812	1.23188	NaN	1.16328	1.1471	1.14526
35		1.12926	1.16331	NaN	NaN	NaN	NaN	1.21858	1.21741	1.11412	1.16118	NaN	1.24563	1.21003	NaN	1.25435	1.16846	NaN	1.20444	NaN	NaN	1.18748	NaN	NaN	1.11436	NaN	NaN	1.12588	NaN	NaN	NaN	1.22839	1.18277	1.19821	NaN	NaN	NaN	1.22903	1.28771	NaN	1.13808	1.25482	NaN	1.20077	1.1458	1.1679
40		1.14486	1.17275	NaN	NaN	NaN	NaN	1.23781	1.25214	1.12446	1.17597	NaN	NaN	NaN	NaN	1.28318	1.18453	NaN	1.22463	NaN	NaN	1.21814	NaN	NaN	1.13595	NaN	NaN	1.14144	NaN	NaN	NaN	1.2896	1.20243	1.20843	NaN	NaN	NaN	1.25902	1.31708	NaN	1.1461	1.2901	NaN	NaN	NaN	1.18537
45		1.17072	1.18437	NaN	NaN	NaN	NaN	1.25885	1.28167	1.14154	1.19482	NaN	NaN	NaN	NaN	1.32161	1.21166	NaN	1.24192	NaN	NaN	1.23741	NaN	NaN	1.13505	NaN	NaN	1.15428	NaN	NaN	NaN	NaN	NaN	1.21826	NaN	NaN	NaN	1.30212	1.34066	NaN	1.16642	1.30339	NaN	NaN	NaN	1.19568
50		1.19789	1.21301	NaN	NaN	NaN	NaN	1.29571	1.31435	1.17134	1.19831	NaN	NaN	NaN	NaN	NaN	NaN	NaN	1.25272	NaN	NaN	1.25902	NaN	NaN	NaN	NaN	NaN	NaN	NaN	NaN	NaN	NaN	NaN	1.22415	NaN	NaN	NaN	1.35086	1.37485	NaN	1.1996	1.33226	NaN	NaN	NaN	1.20822
55		1.24505	1.22302	NaN	NaN	NaN	NaN	1.3332	1.33806	1.18822	1.22333	NaN	NaN	NaN	NaN	NaN	NaN	NaN	1.27717	NaN	NaN	1.27153	NaN	NaN	NaN	NaN	NaN	NaN	NaN	NaN	NaN	NaN	NaN	1.24538	NaN	NaN	NaN	1.39297	1.42871	NaN	1.21944	1.35067	NaN	NaN	NaN	1.21641
60		NaN	1.28709	NaN	NaN	NaN	NaN	1.36342	1.38043	1.21627	1.23755	NaN	NaN	NaN	NaN	NaN	NaN	NaN	NaN	NaN	NaN	1.30989	NaN	NaN	NaN	NaN	NaN	NaN	NaN	NaN	NaN	NaN	NaN	NaN	NaN	NaN	NaN	NaN	NaN	NaN	1.28039	1.36951	NaN	NaN	NaN	1.22479
65		NaN	NaN	NaN	NaN	NaN	NaN	1.38496	1.38385	1.20858	1.28205	NaN	NaN	NaN	NaN	NaN	NaN	NaN	NaN	NaN	NaN	NaN	NaN	NaN	NaN	NaN	NaN	NaN	NaN	NaN	NaN	NaN	NaN	NaN	NaN	NaN	NaN	NaN	NaN	NaN	NaN	NaN	NaN	NaN	NaN	1.24991
WT LatA
Time (min)		Volume (µm3)
0		1	1	1	1	1	1	1	1	1	1	1	1	1	1	1	1	1	1	1	1	1	1	1	1	1	1	1	1	1	1	1	1	1	1	1	1	1	1	1	1	1	1	1	1
5		1.02577	1.02762	1.01316	0.993313	0.99387	0.990361	0.995632	0.992875	1.01135	0.98918	0.989571	0.978408	0.994661	1.01456	1.02494	0.998458	0.995688	1.02375	0.966884	0.989201	1.01018	0.986616	1.00577	0.96564	0.95432	1.01318	0.997516	1.00864	1.00037	1.01859	1.02103	1.01259	1.00019	1.00303	1.01162	1.01692	0.993357	0.986821	0.999991	0.998128	1.00344	1.00513	1.00663	0.993115
10		NaN	1.03282	1.02167	0.998548	0.998378	0.991978	1.00418	1.0051	1.01553	0.991006	0.988759	NaN	0.989585	1.01124	1.02614	0.987466	1.00208	1.02308	0.946748	0.992056	1.00914	0.971729	1.00066	0.969772	0.944093	1.00553	0.991114	1.0112	0.982981	1.02411	1.02867	1.02948	0.989137	0.997893	1.00856	1.01221	0.984225	0.979233	0.997875	0.99468	1.00367	1.00039	0.9991	0.996753
15		NaN	1.0402	1.02627	1.00016	1.0008	0.983729	1.00798	1.01331	1.01946	0.987026	0.983478	NaN	0.981846	1.00639	1.02991	0.988706	1.00104	1.02523	0.938383	0.993001	1.01108	0.964082	0.998164	0.956502	0.919359	1.00172	0.985663	1.01288	0.973922	1.03532	1.03561	1.04407	0.980615	0.995028	1.0048	1.01315	0.979338	0.971744	0.992557	0.993787	1.00237	0.999078	0.994908	0.994146
20		NaN	1.04529	1.02977	1.00676	1.00445	0.984574	1.00834	1.01794	1.01806	0.984098	0.981119	NaN	0.973188	0.99613	1.02737	0.982718	1.00605	1.01501	0.92939	0.995261	1.00532	0.95776	0.991691	0.985468	0.934382	0.993236	0.978476	1.01006	0.959326	1.02429	1.04009	1.06047	0.97307	0.992247	0.997014	1.00853	0.974141	0.963454	0.986112	0.990733	1.00264	0.997522	0.981283	0.991653
25		NaN	1.04759	1.03261	1.00976	1.00449	0.982586	1.00825	1.0271	1.02137	0.986949	0.978924	NaN	0.963952	0.989072	1.02266	1.0062	0.994822	1.00514	0.898715	0.997739	1.00157	0.954737	0.986333	0.98673	0.931666	0.982733	0.970246	1.00321	0.952189	NaN	1.03433	1.06359	0.962478	0.987009	0.989861	1.00543	0.970796	0.959819	0.979343	0.98528	0.995785	0.99531	0.971989	0.992316
30		NaN	1.05157	1.03103	1.0131	1.00482	0.974211	1.00333	1.02634	1.0199	0.986329	0.97925	NaN	0.951783	0.97466	1.01913	NaN	NaN	0.99749	0.896049	0.9978	1.00032	0.9544	0.984941	0.99009	0.925025	0.975155	0.966199	0.995452	0.947671	NaN	1.0342	1.06463	0.952121	0.978515	0.98474	1.00155	0.965886	0.954173	0.972671	0.983467	0.994786	0.99272	0.96276	0.989869
35		NaN	1.05481	1.03197	1.01801	1.0052	0.970841	0.995793	1.02415	1.02193	0.985208	0.977865	NaN	0.942993	0.971354	1.01622	NaN	NaN	0.990138	0.872286	1.00441	1.00075	0.958455	0.978967	0.993251	0.926947	0.971474	0.956556	0.990894	0.945458	NaN	1.02827	1.06194	0.94985	0.975689	0.980701	1.00217	0.965444	0.952824	0.968507	0.981862	0.988969	0.986388	0.955969	0.986202
40		NaN	1.06359	1.03387	1.02198	1.00167	0.968787	0.988565	1.02052	1.02438	0.988267	0.978994	NaN	0.936539	0.963976	NaN	NaN	NaN	0.984808	0.851691	1.0074	0.999655	0.956926	0.977651	0.988502	0.921925	0.966647	0.949733	0.985253	0.94301	NaN	1.02812	1.05048	0.950548	0.976819	0.98005	1.0022	0.962435	0.951883	0.961855	0.972957	0.986359	0.98	0.950525	0.986167
45		NaN	1.06467	1.03425	1.02459	1.00311	0.956705	0.984317	1.01732	1.02824	0.992211	0.98236	NaN	0.931485	0.958456	NaN	NaN	NaN	0.986584	0.848637	1.00805	0.998256	0.959421	0.977451	0.991097	0.921176	0.964766	0.950177	0.982536	0.938593	NaN	NaN	NaN	0.950989	0.975181	0.979737	0.997692	0.95778	0.95313	0.958572	0.971335	0.981302	0.97557	0.949262	0.988515
50		NaN	1.06956	1.03558	1.02905	1.00337	0.952949	0.980432	1.01367	1.02844	0.991934	0.979835	NaN	0.929296	0.955521	NaN	NaN	NaN	0.986569	0.867255	1.0139	1.00445	0.958066	0.977661	0.997624	0.919792	0.96206	0.946014	0.983315	0.934223	NaN	NaN	NaN	0.951655	0.971299	0.977746	0.995414	0.956476	0.950261	0.953904	0.969349	0.980805	0.971488	0.943122	0.989209
55		NaN	1.07736	1.04222	1.0328	1.00207	0.949965	0.979504	1.01215	1.02871	0.991344	0.981333	NaN	0.927013	0.953865	NaN	NaN	NaN	0.981774	0.890366	1.01613	1.00626	0.959252	0.97751	1.02184	0.943002	0.961288	0.942284	0.983647	0.932093	NaN	NaN	NaN	0.958785	0.974053	0.981166	0.99363	0.954896	0.948386	0.950435	0.964255	0.977272	0.968212	0.941948	0.991524
60		NaN	NaN	NaN	1.03756	1.00441	0.944887	0.976721	1.00656	1.02663	0.990388	0.979383	NaN	NaN	NaN	NaN	NaN	NaN	0.980632	0.916523	1.012	1.00339	0.959529	0.98027	1.05126	0.962461	0.960231	0.945311	0.983813	0.928064	NaN	NaN	NaN	0.960736	0.969396	0.9803	0.987701	0.951382	0.944609	0.949865	0.964368	0.976192	0.971805	0.937425	0.99628
65		NaN	NaN	NaN	1.04937	1.00465	0.948481	0.982588	1.00631	1.01602	0.985673	0.988004	NaN	NaN	NaN	NaN	NaN	NaN	0.962309	0.969436	1.01221	1.00321	0.959767	0.982617	1.06013	0.973547	0.959015	0.939071	0.98359	0.935685	NaN	NaN	NaN	0.966779	0.966794	0.992252	0.984882	0.946578	0.941096	0.95545	0.959297	0.978935	0.961417	0.944001	1.00344
Time (min)		Density (mg/ml)
0		1	1	1	1	1	1	1	1	1	1	1	1	1	1	1	1	1	1	1	1	1	1	1	1	1	1	1	1	1	1	1	1	1	1	1	1	1	1	1	1	1	1	1	1
5		0.978699	0.990083	0.969073	1.04026	1.04762	1.02595	1.03769	1.02219	0.989972	1.02702	1.03721	1.07109	1.01449	1.01387	0.963729	1.02995	1.03151	0.98575	1.05786	1.03495	1.03282	1.03013	1.03412	1.04872	1.02806	0.987509	1.01589	1.01334	1.0213	0.995334	0.976446	0.986272	1.03167	0.985336	0.997099	1.01356	1.00062	1.04231	1.01634	1.01749	1.00796	1.00892	0.997393	1.03807
10		NaN	1.00855	0.978968	1.05665	1.0637	1.03774	1.04998	1.01994	1.0061	1.05932	1.04493	NaN	1.03627	1.01925	0.968231	1.03192	1.04246	0.996691	1.10168	1.04963	1.04451	1.06566	1.05779	1.07584	1.04116	1.01023	1.02673	1.02929	1.06316	1.00091	1.01348	1.04324	1.0539	1.00451	1.00936	1.03399	1.03027	1.05565	1.03767	1.01727	1.02986	1.03168	1.01133	1.04922
15		NaN	1.02581	0.989931	1.07591	1.08152	1.06127	1.06561	1.02693	1.01735	1.08711	1.05907	NaN	1.05795	1.03307	0.975999	1.04643	1.05157	1.00294	1.13022	1.06384	1.05754	1.08687	1.07421	1.10379	1.06789	1.02404	1.04357	1.04502	1.09284	1.00147	1.0247	1.06643	1.08113	1.0149	1.02701	1.05202	1.04054	1.07806	1.04405	1.03146	1.04715	1.04727	1.02245	1.07023
20		NaN	1.04195	1.0041	1.08842	1.09067	1.06806	1.08455	1.03738	1.03986	1.11625	1.07652	NaN	1.07992	1.05032	0.991654	1.04743	1.05444	1.0216	1.14733	1.07405	1.0759	1.10706	1.09309	1.11206	1.05838	1.04422	1.06081	1.06539	1.12737	1.03119	1.06507	1.12426	1.09416	1.02949	1.04876	1.07211	1.05271	1.10113	1.06097	1.04449	1.06149	1.06145	1.04748	1.09239
25		NaN	1.06406	1.02521	1.10163	1.1012	1.08892	1.09111	1.04347	1.06031	1.14649	1.08664	NaN	1.1016	1.0606	1.01042	1.07253	1.04555	1.04473	1.19495	1.08725	1.09047	1.12533	1.10593	1.12567	1.08359	1.05795	1.08281	1.08698	1.14933	NaN	1.06759	1.14397	1.10458	1.05099	1.07626	1.09389	1.07117	1.11768	1.07761	1.059	1.08804	1.0755	1.0668	1.10278
30		NaN	1.08095	1.03519	1.10629	1.11321	1.11353	1.10346	1.06238	1.07993	1.15715	1.10577	NaN	1.14141	1.07966	1.03405	NaN	NaN	1.05484	1.20352	1.10216	1.11581	1.13778	1.11569	1.13731	1.09231	1.0729	1.10173	1.11083	1.17363	NaN	1.07218	1.14722	1.13222	1.06416	1.09652	1.12303	1.09047	1.13847	1.0889	1.07539	1.10339	1.08946	1.08725	1.12296
35		NaN	1.09396	1.051	1.1136	1.12157	1.12773	1.11604	1.0779	1.09658	1.17364	1.13074	NaN	1.16319	1.08814	1.04499	NaN	NaN	1.07412	1.23857	1.10567	1.13347	1.13903	1.13554	1.14733	1.10059	1.08601	1.1321	1.1279	1.19207	NaN	1.08312	1.17321	1.1505	1.07127	1.11843	1.13718	1.09631	1.15294	1.09698	1.10371	1.12877	1.10834	1.10225	1.14207
40		NaN	1.10757	1.05533	1.12639	1.13311	1.14866	1.12506	1.09665	1.11135	1.18985	1.15247	NaN	1.19392	1.09407	NaN	NaN	NaN	1.08904	1.26762	1.11958	1.15158	1.15319	1.15148	1.17436	1.12338	1.09408	1.147	1.15012	1.21307	NaN	1.10559	1.17313	1.15187	1.07342	1.1353	1.15466	1.11165	1.16536	1.12881	1.12517	1.14634	1.13188	1.12113	1.15102
45		NaN	1.12448	1.06985	1.13396	1.14835	1.18817	1.12938	1.11228	1.12513	1.19426	1.16213	NaN	1.21619	1.10051	NaN	NaN	NaN	1.09545	1.28916	1.14044	1.16615	1.15741	1.16334	1.18426	1.1374	1.09892	1.15266	1.16451	1.23848	NaN	NaN	NaN	1.17218	1.07995	1.1526	1.17308	1.13411	1.16937	1.13705	1.14029	1.16749	1.15223	1.1325	1.15535
50		NaN	1.13775	1.07893	1.14246	1.1598	1.20768	1.14434	1.12778	1.14091	1.21457	1.17194	NaN	1.22856	1.09872	NaN	NaN	NaN	1.10311	1.27701	1.15423	1.17674	1.1708	1.17771	1.20552	1.13929	1.11481	1.16153	1.17354	1.26979	NaN	NaN	NaN	1.1898	1.09156	1.16722	1.18489	1.14393	1.18034	1.14786	1.15464	1.17817	1.1663	1.15194	1.16727
55		NaN	1.13495	1.09785	1.16566	1.16714	1.23267	1.15845	1.13197	1.1572	1.21985	1.1832	NaN	1.21947	1.12058	NaN	NaN	NaN	1.12831	1.26046	1.1652	1.1864	1.18461	1.19155	1.19582	1.12689	1.13042	1.17649	1.18818	1.2839	NaN	NaN	NaN	1.18457	1.08762	1.17711	1.19475	1.15081	1.19452	1.16165	1.17109	1.18727	1.18597	1.16522	1.17101
60		NaN	NaN	NaN	1.17426	1.18018	1.26333	1.1816	1.14499	1.18308	1.22977	1.18527	NaN	NaN	NaN	NaN	NaN	NaN	1.14293	1.23893	1.19648	1.20259	1.19774	1.19817	1.18853	1.1078	1.13962	1.17434	1.19532	1.30558	NaN	NaN	NaN	1.19833	1.10146	1.19478	1.20742	1.16387	1.20804	1.16656	1.16901	1.19098	1.18883	1.18106	1.17976
65		NaN	NaN	NaN	1.19299	1.16584	1.27877	1.20785	1.13007	1.21675	1.18774	1.20903	NaN	NaN	NaN	NaN	NaN	NaN	1.19225	1.17259	1.19433	1.21879	1.22246	1.20238	1.15423	1.08115	1.18307	1.20647	1.21908	1.28685	NaN	NaN	NaN	1.19305	1.07727	1.18721	1.22111	1.17519	1.22412	1.1876	1.16951	1.18545	1.22648	1.17524	1.18109
Time (min)		Mass (pg)
0		1	1	1	1	1	1	1	1	1	1	1	1	1	1	1	1	1	1	1	1	1	1	1	1	1	1	1	1	1	1	1	1	1	1	1	1	1	1	1	1	1	1	1	1
5		1.00392	1.01724	0.981626	1.03318	1.04103	1.01587	1.03309	1.0148	1.00105	1.01569	1.02623	1.04796	1.00898	1.0286	0.987319	1.02835	1.02702	1.00899	1.02021	1.02353	1.04331	1.01614	1.04014	1.01134	0.978989	1.00046	1.01336	1.02215	1.02132	1.01374	0.998353	1.00085	1.03191	0.988186	1.00866	1.03082	0.993931	1.02828	1.01626	1.01546	1.0113	1.01411	1.00395	1.03077
10		NaN	1.04162	1.00022	1.05509	1.06195	1.02922	1.05448	1.02505	1.02174	1.04975	1.03308	NaN	1.02519	1.03061	0.993212	1.01889	1.04466	1.01958	1.03923	1.0412	1.05408	1.03455	1.05835	1.04208	0.980893	1.01547	1.0175	1.04086	1.04361	1.02496	1.04372	1.07663	1.04208	1.00216	1.01792	1.04641	1.01348	1.03328	1.03532	1.01176	1.03357	1.03193	1.01015	1.04578
15		NaN	1.0669	1.01603	1.07611	1.08241	1.04353	1.0742	1.04052	1.03714	1.07301	1.04156	NaN	1.03829	1.03925	1.00489	1.03473	1.05269	1.02805	1.05821	1.05643	1.06917	1.04731	1.07207	1.05491	0.979586	1.02521	1.02843	1.0584	1.06289	1.03667	1.06227	1.1161	1.05963	1.00954	1.03148	1.06547	1.01861	1.04736	1.03622	1.02499	1.04944	1.04611	1.01684	1.06391
20		NaN	1.08913	1.03411	1.09574	1.09554	1.05118	1.0934	1.05598	1.05874	1.09853	1.05608	NaN	1.05057	1.0459	1.01851	1.02954	1.06079	1.03635	1.06263	1.069	1.08159	1.05988	1.08388	1.09492	0.986844	1.03658	1.03763	1.07592	1.08091	1.05624	1.10752	1.19213	1.06421	1.02109	1.04507	1.08101	1.02528	1.06038	1.04577	1.03443	1.06397	1.05875	1.02715	1.08301
25		NaN	1.11461	1.05857	1.11228	1.10599	1.06926	1.09982	1.07172	1.08297	1.1314	1.06357	NaN	1.06135	1.04859	1.0331	1.07918	1.04013	1.04956	1.07115	1.08469	1.09193	1.07431	1.09071	1.11005	1.00839	1.03955	1.05023	1.08992	1.09412	NaN	1.10412	1.21662	1.063	1.03729	1.06487	1.09971	1.03973	1.07233	1.05513	1.04318	1.08328	1.07047	1.03628	1.09402
30		NaN	1.13666	1.06731	1.1206	1.1185	1.08433	1.10673	1.09012	1.10137	1.14125	1.08267	NaN	1.08557	1.05199	1.0538	NaN	NaN	1.05177	1.07524	1.09969	1.11581	1.08582	1.0988	1.12483	1.00856	1.04613	1.06415	1.10538	1.11218	NaN	1.10871	1.22124	1.07754	1.04109	1.07932	1.12469	1.05303	1.08615	1.05902	1.0575	1.0975	1.08138	1.04642	1.11144
35		NaN	1.15376	1.08455	1.13353	1.12729	1.09442	1.11111	1.10369	1.12061	1.15633	1.10591	NaN	1.09624	1.05684	1.06194	NaN	NaN	1.06329	1.07825	1.11042	1.13424	1.09167	1.11139	1.13875	1.01861	1.05495	1.08249	1.1173	1.12684	NaN	1.11366	1.24583	1.09244	1.04506	1.09683	1.13952	1.05815	1.09842	1.06231	1.08352	1.11613	1.09279	1.05341	1.12628
40		NaN	1.17801	1.09102	1.15102	1.13492	1.11198	1.11219	1.11912	1.13844	1.17596	1.1284	NaN	1.11764	1.05451	NaN	NaN	NaN	1.07248	1.07956	1.12779	1.15125	1.10349	1.1256	1.15792	1.03231	1.0575	1.08907	1.133	1.14381	NaN	1.13668	1.23234	1.09455	1.04838	1.11262	1.15712	1.06972	1.10927	1.08538	1.0944	1.13053	1.10853	1.06565	1.13508
45		NaN	1.19736	1.10656	1.16173	1.15205	1.13622	1.11157	1.13138	1.15695	1.18499	1.14168	NaN	1.13268	1.05465	NaN	NaN	NaN	1.08077	1.09393	1.14947	1.1641	1.11042	1.13698	1.17122	1.04499	1.06015	1.095	1.14418	1.16208	NaN	NaN	NaN	1.11446	1.05299	1.12921	1.17023	1.08611	1.11454	1.08947	1.10711	1.14544	1.12369	1.07496	1.14207
50		NaN	1.21704	1.11738	1.1756	1.16367	1.15038	1.12186	1.1431	1.17332	1.2047	1.14825	NaN	1.14168	1.04971	NaN	NaN	NaN	1.0883	1.10624	1.17013	1.18205	1.12168	1.15129	1.20082	1.04524	1.07251	1.09857	1.15394	1.18594	NaN	NaN	NaN	1.1321	1.06008	1.14113	1.17938	1.0941	1.12158	1.09464	1.11893	1.15536	1.13295	1.08618	1.1547
55		NaN	1.22275	1.1442	1.20398	1.16958	1.17064	1.13466	1.14563	1.19018	1.20922	1.1611	NaN	1.13046	1.06889	NaN	NaN	NaN	1.10744	1.11921	1.18379	1.19387	1.1363	1.16473	1.21967	1.05971	1.08663	1.10839	1.16872	1.19655	NaN	NaN	NaN	1.13573	1.05929	1.15483	1.187	1.09881	1.13276	1.10393	1.12917	1.16024	1.14817	1.09741	1.16114
60		NaN	NaN	NaN	1.2184	1.18534	1.19372	1.15418	1.15249	1.21432	1.21783	1.16083	NaN	NaN	NaN	NaN	NaN	NaN	1.12033	1.13182	1.21085	1.20681	1.14924	1.17454	1.24929	1.06605	1.09424	1.10982	1.17596	1.21161	NaN	NaN	NaN	1.15125	1.06776	1.17117	1.19252	1.10723	1.14108	1.10812	1.1273	1.16256	1.15514	1.10705	1.17538
65		NaN	NaN	NaN	1.25189	1.17126	1.21289	1.18682	1.1372	1.23625	1.17073	1.19453	NaN	NaN	NaN	NaN	NaN	NaN	1.14732	1.13675	1.20892	1.2227	1.17328	1.18148	1.22364	1.05255	1.13459	1.13296	1.19907	1.20409	NaN	NaN	NaN	1.15342	1.0415	1.17801	1.20265	1.11241	1.15201	1.13469	1.1219	1.16047	1.17916	1.10942	1.18515

## Sheet: Fig5S1_LatA
Density increase	Volume
1.14506	78.8784
1.18293	81.4602
1.12365	86.36
1.19474	92.6288
1.23458	93.1276
1.1264	94.8953
1.30376	102.327
1.18604	105.366
1.20866	108.922
1.1587	110.358
1.14445	110.705
1.19908	111.617
1.1517	111.841
1.19059	117.449
1.19356	118.125
1.19123	120.57
1.19879	131.853
1.25177	143.784
1.1846	143.814
1.21446	147.723
1.18531	149.388
1.15933	151.595
1.18025	152.765
1.1927	157.072
1.12523	157.515
1.2023	158.857
1.32902	159.92
1.13488	160.145
1.20529	161.044
1.20862	161.148
1.18128	173.705
1.20697	174.051

## Sheet: Fig6_PoleGrowthDensity
Figure 6B			Figure 6C						Figure 6E
Density difference (mg/ml)			cell ID	Old pole growth (µm)	New pole growth (µm)	Old pole average density (mg/ml)	New pole average density (mg/ml)		5 min			35 min
5.18046			3	3.02171	2.20862	294.316	300.153		Daughter density difference	Mother halves density difference		Daughter density difference	Mother halves density difference
0.481382			4	4.0098	1.83798	273.384	296.894		2.05147	13.7065		2.05147	-5.20054
11.4019			5	3.44362	1.31908	283.086	305.615		20.8391	30.2981		20.8391	20.6752
13.5832			6	3.96183	1.94044	291.48	299.742		5.52221	10.5863		5.52221	-6.55543
9.7222			7	3.10677	1.52567	284.676	287.848		11.4041	22.8796		11.4041	19.4247
11.7865			8	4.29333	2.72002	278.377	290.81		15.06	10.543		15.06	3.7048
11.3346			9	4.13198	3.39574	283.304	288.876		3.15033	-12.3409		3.15033	1.44046
3.73047			10	3.90077	2.88276	287.538	294.96		-19.3488	-30.8644		-19.3488	-4.24719
2.4289			11	3.56475	2.17383	287.141	297.331		3.17107	5.68035		3.17107	-13.021
0.134101			12	3.90299	2.40052	273.457	294.451		-3.41322	-23.5949		-3.41322	-14.4362
2.47254			13	5.25656	0.645266	276.887	296.908		24.8076	17.9736		24.8076	1.0055
3.95728			14	3.04861	1.37173	285.954	301.757		8.04291	-8.01466		8.04291	16.4653
12.0576			33	3.73151	3.49135	276.334	287.216		25.3959	7.85681		25.3959	17.5524
0.562652			34	5.60359	1.82926	269.668	293.178		-17.8085	-50.8911		-17.8085	-9.15569
7.72177			35	2.54421	4.89525	283.863	288.509		24.6849	21.1739		24.6849	-10.9609
1.59808			36	3.62732	2.35036	261.104	276.273		21.1585	17.9627		21.1585	8.91692
10.8728			47	3.43754	0.532311	269.829	296.651		42.3655	42.7233		42.3655	19.7847
1.55912			48	5.67758	0.514578	270.489	299.066		-32.0587	-13.8958		-32.0587	-12.7694
16.1053			49	4.1078	1.83963	273.691	290.458		-36.8207	-47.4152		-36.8207	-7.53559
3.67017			50	4.6257	1.4515	266.521	284.773		-27.9958	-50.5355		-27.9958	-14.7897
7.02272			54	6.01419	0.743612	282.839	301.82		21.6093	42.1373		21.6093	9.04797
10.0026			55	2.00013	3.70768	288.017	282.188		1.4917	29.6598		1.4917	8.43054
2.92798			56	4.68971	0.0243222	264.293	280.777		14.4259	19.01		14.4259	15.8746
1.68118			57	4.56128	0.877364	266.033	281.259		-16.0945	-14.0797		-16.0945	-19.3735
31.0682			69	4.67039	2.57744	288.044	290.931		19.5359	41.5321		19.5359	19.1759
12.5842			70	6.23599	0.438686	257.759	283.311		-14.2208	-12.2641		-14.2208	-8.81252
7.12698			71	5.0034	0.44664	261.003	283.273		-10.9624	-41.7838		-10.9624	-12.4294
8.07698			72	0.605125	5.57094	312.875	283.93		4.31892	-9.87185		4.31892	-1.41963
17.2215			73	5.48313	0.886167	264.676	295.659		11.645	13.6408		11.645	6.87633
12.0164			74	4.59434	1.26	264.093	291.816		-3.99442	-17.0288		-3.99442	-12.4478
17.1096			75	2.20299	5.41016	295.796	279.991		9.21094	13.9625		9.21094	-3.48765
4.10369			76	3.64933	1.0222	256.943	275.055		-39.6581	-40.886		-39.6581	-20.5568
21.8984			77	5.04597	1.55084	274.776	297.09		33.1842	49.2167		33.1842	18.6691
8.85936			78	4.52399	2.15901	291.988	291.34		1.96047	10.923		1.96047	-4.74338
25.7338			79	6.36604	-0.108821	256.651	284.065		25.9664	36.6339		25.9664	22.7398
19.5752			80	4.93476	1.26286	277.947	298.489		-17.7693	-33.2351		-17.7693	-14.4443
17.2181			104	4.02825	2.29466	264.8	281.383		-22.0705	-30.2337		-22.0705	-21.5623
7.9661			105	4.95481	2.11123	253.97	274.448		-32.655	-30.7997		-32.655	-21.9261
0.811174			106	4.49238	2.53803	269.919	286.963		-17.2606	-38.5384		-17.2606	-2.78648
8.27051			107	5.55382	1.17323	259.046	277.732		6.05534	17.1097		6.05534	4.48503
7.32563			117	2.20941	3.06362	282.935	290.185		-2.521	10.6765		-2.521	6.78295
4.75865			118	4.26568	1.68547	266.025	283.172		14.2101	16.3547		14.2101	-18.7343
16.4288			119	4.32613	0.887095	277.266	295.724		-14.5586	-23.5412		-14.5586	-17.46
18.6943			120	4.44814	1.81369	267.702	282.584		-15.5798	14.3541		-15.5798	5.32226
6.25297			121	3.87895	2.24701	271.498	282.892		10.0229	21.9782		10.0229	-0.0349862
10.2084			122	4.28957	1.43627	259.213	275.716		12.1139	20.8881		12.1139	13.6058
13.5686			123	4.92705	1.90964	273.705	285.188		-19.5301	-12.7334		-19.5301	-2.60009
15.7153			124	4.71025	2.90706	285.656	287.013		-20.7254	-23.5378		-20.7254	-3.71758
18.7117			125	2.97902	2.26852	289.892	291.799		13.7455	25.4309		13.7455	11.8711
6.77494			126	4.78046	2.0023	273.188	280.618		13.1694	23.832		13.1694	2.48555
0.0347104			127	4.3549	2.46367	277.625	277.077		12.5475	18.7133		5.15207	-13.7478
2.80423			128	3.49601	2.59963	263.297	272.324		5.15207	-17.8037		9.04945	17.6695
14.9377			129	3.10961	3.49198	264.72	270.349		9.04945	37.4136		-1.24395	-20.1589
0.65591			130	4.74306	2.41576	256.575	272.614		-1.24395	-23.8542		19.2411	9.38353
9.99039			149	3.9057	3.07428	274.446	286.004		19.2411	-8.24332		-12.2983	6.4733
12.3296			150	3.43577	1.4999	269.781	276.575		-12.2983	-23.8881		24.1532	7.15496
28.535			151	4.00392	1.25652	278.002	297.317		24.1532	24.5483		-2.39415	-9.67224
5.18313			152	4.42423	0.217447	296.586	319.156		-2.39415	-14.5965		2.23065	0.843713
12.2915			153	3.06219	2.87055	266.426	275.439		2.23065	20.9633		5.34461	-16.9883
7.53273			154	4.58762	1.15005	265.19	275.737		5.34461	2.38698		-10.3381	-5.62167
1.24997			155	3.6874	2.17362	264.761	275.413		-10.3381	-15.7535		10.1195	7.35818
1.90513			168	2.72964	2.12209	291.684	287.026		10.1195	24.2008		-10.8055	2.25584
1.05794			169	4.63817	1.57825	267.229	282.225		-10.8055	14.5695		-11.0738	1.53032
24.6793			170	4.96158	1.2776	280.593	293.812		-11.0738	2.69855		-8.16834	-20.4544
12.977			171	5.01743	2.65938	276.507	283.964		-8.16834	-28.8673		-6.84195	-20.7201
4.10626			172	3.85733	2.14064	293.471	294.952		-6.84195	-52.5732		-3.1777	-3.11897
1.33609			173	3.21535	1.62102	276.83	290.748		-3.1777	24.865		-14.6752	-5.97107
2.37118			184	6.44338	0.952838	271.767	287.565		-14.6752	10.2412		9.64293	-8.18811
2.54199			185	4.36746	0.9385	280.345	297.644		9.64293	-7.8576		-14.1252	-9.03998
7.39062			186	3.06989	0.807414	279.212	301.064		-14.1252	-31.0481		8.59249	18.0925
1.53538			187	4.38387	1.99694	269.215	281.601		8.59249	4.83512		-6.9598	-18.2402
0.924151			198	6.19914	0.840883	264.423	280.001		-6.9598	-1.1229		5.36069	9.60603
12.7611			199	6.19405	0.84601	264.476	284.8		5.36069	16.8401		-2.66567	-11.6985
2.88092			200	4.90866	0.258342	264.215	291.381		-2.66567	-14.2637		11.9188	0.568446
15.1341			201	4.65835	0.235602	270.819	287.639		6.88403	14.9746		16.4562	13.4867
3.14225			202	3.75118	2.78889	286.54	286.297		11.9188	48.4144		23.6821	1.98995
0.453543			204	1.91083	4.90656	300.139	294.468		16.4562	26.7411		18.45	-5.90595
14.5319			205	5.30063	1.15022	280.148	286.839		23.6821	28.85		2.35108	-1.17026
20.1922									18.45	11.7279		18.1861	12.2885
6.29697									2.35108	13.3792		-26.6779	8.01171
3.82518									18.1861	14.7124		-1.77178	-10.3976
7.46253									-26.6779	-8.32046		-30.0046	-7.26842
1.6324									-1.77178	-5.90224		16.0034	11.7934
1.03418									-30.0046	-25.8861		26.3057	20.7983
6.59653									16.0034	20.8136		24.1801	2.8552
1.37965									26.3057	29.149		-10.409	-21.8116
4.4328									24.1801	1.09472		2.61856	3.74176
2.73601									-10.409	-16.4058		-1.18561	20.7227
2.49489									2.61856	10.25		1.58158	13.6621
6.91809									-1.18561	9.15814
1.91116									1.58158	17.3099
6.51852
18.4883
10.3924
16.0749
5.93662
7.32219
29.5767
2.44979
11.2185
8.26151
20.6963
8.01687
11.9863
23.2935
21.4094
17.5062
17.9064
12.9888
2.0502
15.7174
8.33789
13.3347
8.34874
4.28383
1.89765
11.517
5.06122
1.3201
1.4655
2.3838
8.88141
14.1221
1.6661
13.0402
1.4309
4.63247
5.95237
4.78682
1.58484
15.7298
6.8791
0.0974471
8.72796
3.93593
13.5624
1.29325
2.28908
7.08024
4.96518
7.20304
0.476599
6.09006
15.2151
7.87496
6.9314
6.04357
14.5578
2.97077
15.138
3.14117
0.865908
4.2829
16.478
22.1725
5.03858
4.95996
11.36
3.29074
3.00605
11.6737
8.59653
5.5827
5.96822
1.27394
12.6196
19.6931
18.9148
28.9985
6.73698
3.6224
8.01444
4.75745
16.8303
12.6696
10.1708
26.1103
20.8762
16.3289
24.8336
20.8584
0.328017
22.7073
23.8998
13.3806
1.60321
2.64037
26.7931
13.6133
19.9778
28.936
18.748
8.6537
17.9054
3.27884
7.15289
1.37615
3.15279
12.1966
4.72497
1.96647
5.27557
0.681808
8.5959
8.32705
6.27304
0.636978
10.5035
3.88535
5.47954
1.04445
2.1903
9.26068
0.955763
3.65404
13.3192
19.1701
18.8164
1.01041
28.0803
0.510581
16.1109
4.8281
15.5173
1.47144
24.664
25.583
4.45645
5.04234
13.3108
11.4592
15.4973
7.7041
3.79565
2.84806
15.3511
2.50427
27.9949
18.2605
18.0506
0.395084
1.98182
0.562578
13.3785
7.85047
25.7448
2.09786
3.71248
25.7441
38.2269
3.80725
19.1323
25.9473
4.51516
33.055
17.8257
8.14703
20.9163
13.4795
20.8652
2.11129
18.9683
14.3001
23.1695
4.25255
4.67673
7.70032
8.77314
5.15556
7.03473
15.5311
4.80625
5.61509
3.0967
15.523
9.08351
2.37787
3.55419
8.68245
2.506
3.7295
11.8009
0.141356
5.06577
1.74357
5.69544
2.11175
2.60755
9.69016
18.6499
16.9755
0.520609
0.202764
32.0573
2.7993
6.13312
15.9796
5.70635
0.390427
25.8642
29.3394
15.695
19.4227
10.2525
9.65424
14.5885
8.99879
28.5013
4.03235
11.6813
12.2857
7.58212
23.3041
26.5861
18.5886
18.9309
9.6948
10.4326
10.136
17.4797
2.49963
14.9459
8.90163
4.04741
24.4054
42.1138
3.65879
14.5654
22.4894
26.148
13.54
23.3985
21.0504
16.547
13.1835
19.8357
0.154272
2.80506
3.00891
7.1693
4.56345
16.3227
8.55037
9.07843
7.60933
1.14642
4.93503
2.74936
27.0888
8.24419
2.46318
4.51016
10.2343
6.95291
4.66809
12.7388
6.31898
15.2641
4.69858
17.296
23.9973
15.7668
15.8658
18.7273
6.53068
0.803583
5.3838
6.71311
3.04809
30.6463
21.8897
12.1371
5.49447
16.4944
21.3773
18.8861
9.2019
22.6563
12.3879
17.2328
11.7081
15.8681
6.89517
15.7688
23.2527
22.004
1.97016
2.51342
2.99983
0.298024
10.432
2.85922
10.8698
15.038
36.0762
42.8417
29.5516
4.07336
35.1109
4.94715
21.7968
21.7885
20.5711
8.48979
2.2709
21.7778
16.1221
34.9803
3.31922
10.284
8.57484
2.6089
0.16247
5.77666
1.32335
15.7229
9.61383
13.973
2.65897
9.20742
20.7163
16.6577
2.70939
9.71728
0.872356
2.73727
9.73048
7.73314
5.44246
2.42109
26.6143
2.35491
8.41041
12.7784
26.3304
0.91085
15.9556
41.8464
10.2024
9.94953
13.6849
1.25344
1.61182
26.6683
10.252
1.42188
2.72235
22.1013
17.9452
8.23226
12.4499
11.1364
4.55615
24.8628
12.5527
17.0639
0.97169
19.6978
28.0123
21.565
18.1771
10.0501
13.2265
13.8912
13.5382
27.3968
1.33772
17.5382
9.51762
40.2741
6.97114
26.4621
33.439
12.8955
34.2484
13.6696
11.5961
17.785
6.53708
11.0135
1.53234
12.446
15.3213
26.8756
11.1575
16.8069
3.14686
2.15161
0.0449353
7.98824
8.14732
19.2821
7.3916
19.45
14.0887
11.9845
15.1816
17.4111
1.16662
4.51788
9.07395
7.99355
14.0919
1.44682
3.73602
3.68535
28.1866
5.53583
16.7627
20.2329
18.8069
5.38372
16.8427
37.3301
17.8593
0.617617
12.9857
0.231654
3.30862
22.5974
19.3655
11.6059
3.09679
23.9679
17.6253
15.649
13.517
15.4485
24.4163
16.0826
19.679
28.8506
17.2056
29.871
6.13348
24.0496
19.8423
2.79535
6.28294
8.31964
0.656689
20.1801
25.0014
40.4222
33.0876
56.389
21.6313
20.0727
27.9262
13.3945
36.8804
6.27235
34.662
28.3689
31.9412
16.417
2.72282
8.57244
18.0202
23.8531
10.392
14.694
12.6661
3.45998
5.45657
5.21061
6.47196
25.5907
0.349314
9.5669
22.578
13.7281
14.4157
18.9592
1.54755
14.5136
10.1441
13.6353
11.0827
8.67614
2.2169
34.4963
3.68221
6.3493
15.8774
10.8984
0.610444
13.3482
37.806
23.3356
14.6954
28.216
1.89007
10.1676
46.9258
16.8186
20.858
0.862424
11.7619
21.0727
15.8178
10.1246
23.579
28.3052
11.205
2.15416
37.1342
3.94565
23.3657
24.8687
15.1899
17.2514
21.0512
18.7955
17.0482
10.4194
13.1812
21.5428
14.2175
32.4756
61.2932
34.5598
50.4208
25.4352
33.37
20.803
14.361
12.6129
21.4303
19.6475
19.4167
22.26
20.986
2.81946
17.17
24.3153
19.1281
15.1535
5.78313
19.6042
3.03243
5.67435
4.28658
20.8487
17.8448
5.97567
12.4848
9.56987
19.0497
17.1084
25.32
16.7882
14.2661
5.4353
18.6203
13.2378
2.73616
20.0087
11.6795
9.05182
18.7931
10.0052
16.8564
15.6298
1.28432
19.9031
5.65572
0.824208
20.5135
11.1974
5.78724
11.3207
14.9293
11.7475
14.0758
19.6924
20.1628
6.87325
19.1564
20.2058
28.3553
2.27045
45.9431
29.0417
26.1675
20.0662
21.8317
27.2096
12.279
4.65074
15.4476
10.702
26.9545
30.2111
61.1379
30.8646
34.8056
14.077
18.2953
13.6611
10.5343
31.267
38.0885
18.6417
24.6965
0.566586
17.8989
24.9162
20.9875
7.03462
20.371
8.31928
0.0610543
19.7875
5.98221
18.915
12.3892
7.3788
11.0583
8.204
7.71955
12.9025
12.6851
8.11143
12.9149
16.2328
7.42435
7.99985
19.7585
5.81736
5.53521
13.7377
13.3456
17.1185
16.0471
11.4265
15.3558
0.0493058
2.1121
7.47525
29.8408
20.9826
18.4244
1.00447
12.6622
12.7345
29.3328
21.3365
21.5974
22.1752
28.709
4.90745
20.2719
30.537
22.0991
30.3311
16.0741
32.5214
10.0903
19.8539
1.86466
7.92862
32.5105
39.6975
56.7253
25.3328
47.9484
24.8567
28.5918
27.9083
0.537835
23.2865
27.2208
13.499
18.7335
6.1947
4.48655
11.9032
25.0606
1.14111
7.64804
0.661434
11.4687
14.2154
9.55313
15.9295
12.8485
12.7634
28.8264
24.4453
19.8939
9.95537
14.791
24.217
0.231613
14.228
14.139
22.214
11.53
17.2342
27.4978
13.9032
24.692
25.6774
44.7472
8.84499
4.13888
6.64367
11.1024
7.18866
39.9024
26.3705
6.80771
4.33245
32.0701
10.4774
12.4651
27.4197
29.2471
30.562
18.5266
3.5402
17.8998
29.6987
30.7111
21.5793
33.43
44.9932
20.472
15.2958
28.4878
24.9081
39.4455
64.3155
28.1307
36.8413
27.4765
27.0929
27.4202
3.04822
23.3694
8.53416
21.2799
20.0436
6.12736
30.0478
2.7912
6.85614
20.7032
29.782
7.56171
20.4489
18.6566
5.02325
0.137273
12.7933
10.2318
10.4208
6.32458
6.64287
24.8042
5.93574
27.2959
14.4561
11.7246
11.6624
17.4284
7.12433
0.922212
15.346
9.76612
26.4419
6.94147
12.3598
16.4021
13.1875
0.112671
30.0039
24.2715
51.2932
17.101
12.3533
1.88551
2.54711
33.5315
1.14637
26.5444
16.9729
10.9577
13.4635
20.1505
36.1167
26.9241
1.99273
17.6524
19.6819
0.48383
6.34454
6.99088
23.0312
15.4024
14.1066
20.4425
33.9147
34.0676
52.4539
38.6045
51.4239
22.0542
43.78
16.1631
1.89481
17.6043
17.0395
23.8902
23.8113
21.5665
28.184
8.75912
25.0032
9.20903
19.6593
5.37182
27.5333
24.3436
21.2617
8.45639
5.09734
3.8784
13.6992
16.7454
16.0515
5.73245
14.0321
5.71235
3.49323
20.3437
3.29375
6.33213
10.5606
15.9749
7.92514
15.1938
22.1576
5.06263
13.9114
14.6445
11.8869
39.0468
30.9244
19.0623
37.0804
6.52717
5.36331
12.1844
37.4658
18.602
1.24352
16.0002
20.5121
5.1893
12.182
34.2593
32.5393
5.85348
14.9181
4.78624
23.3198
7.52717
19.0363
34.8132
17.9016
36.7753
31.3112
15.6041
5.32919
1.32175
20.0531
30.4012
49.1758
64.2628
40.9596
41.2903
26.4408
31.2018
7.98126
11.7761
15.0023
40.91
16.5109
16.0759
14.8515
31.2363
17.705
26.1177
16.6184
2.1264
2.24527
17.5789
19.5281
19.0141
20.4744
1.72723
5.46776
5.71595
0.769639
25.5644
26.3572
26.405
17.4323
24.5098
29.755
17.8806
12.2754
1.08231
18.9815
1.18541
8.72715
13.2149
17.6322
35.4667
0.873908
27.1101
28.6065
33.8866
7.21256
7.8244
15.2795
15.7656
10.2417
27.2888
22.3319
0.421092
16.1581
19.1724
3.71134
9.14393
31.0826
37.2742
13.9934
12.4029
26.1386
23.706
1.9437
20.1701
28.1692
35.427
20.8864
21.6927
25.4111
16.1044
16.7298
23.5676
0.795739
33.3499
41.108
54.8314
38.6489
20.1601
19.0913
14.7475
18.5569
13.8929
14.3203
51.0431
3.21861
23.0955
27.5774
26.8944
11.0293
15.5366
22.8742
11.1327
7.6796
16.0963
16.0853
19.0019
6.47581
10.0701
3.42617
11.0288
8.76816
43.3072
35.5296
29.5034
9.00204
11.9777
2.17062
7.05384
8.7103
2.90402
27.0862
16.5285
15.582
8.81113
26.5083
15.193
21.3941
30.117
7.42691
32.0099
28.1975
22.2471
15.9411
4.79726
9.40083
22.2148
25.357
23.9722
25.5263
1.5096
2.91144
28.6278
4.21686
3.25521
14.5591
36.3331
31.9712
9.038
31.7206
26.5608
10.1054
11.651
23.4799
19.4458
23.9869
34.1412
22.2655
3.49254
15.9238
29.6681
6.47794
44.1608
44.1094
55.04
43.9178
3.6756
8.64732
22.9587
29.8634
13.6754
29.7459
53.4566
1.44907
24.6925
25.0564
21.6927
15.5455
14.9453
24.427
16.3583
3.85482
20.7381
4.49096
6.39871
2.60347
15.5639
0.946508
12.2354
10.5984
35.6132
30.1167
31.9651
18.5072
18.8927
19.1654
11.003
32.9989
13.7253
1.75842
5.63019
19.3631
21.9186
4.03625
29.8926
7.64827
19.4559
56.1619
31.0771
21.1047
16.7613
16.6096
9.79831
21.0084
22.1189
10.4017
17.5612
4.86709
19.7337
10.554
12.5897
14.5951
30.3501
28.3618
0.409758
20.041
21.0677
14.7253
14.226
21.8665
31.7649
31.0074
36.6982
33.3184
8.00644
10.5751
22.1549
42.9299
35.9704
40.0512
36.9214
23.3457
23.1364
27.1983
25.5047
25.9612
18.3961
0.445607
12.0782
39.0079
27.061
3.22577
10.1088
18.1382
7.24784
19.0597
30.9587
23.4149
6.49606
6.88897
9.0872
14.7853
3.75041
11.0197
2.19008
15.5996
23.0965
6.12704
3.84167
16.0902
0.414717
33.4357
23.3766
18.4025
5.01236
24.3869
18.1192
38.0202
32.3526
27.0797
11.6812
26.5315
4.02425
20.3567
28.5403
7.97899
1.73902
13.6034
12.4768
8.04362
17.5889
16.1945
45.2815
6.12901
19.1283
13.7584
19.2365
2.70579
15.031
29.7016
16.638
15.2602
9.64671
8.49799
7.47929
10.9635
26.7106
40.575
26.5674
33.9292
32.0992
46.5547
11.3555
15.3976
6.80171
34.1314
21.584
33.8221
17.6491
8.80002
18.4498
25.9746
19.7703
19.0281
31.0907
16.8285
21.7887
13.7468
16.8806
17.0881
0.712089
25.4344
18.6566
9.89164
39.6291
24.7761
3.88036
14.8804
23.6329
20.3743
27.1362
21.8669
0.176726
23.5579
10.2436
10.419
0.282645
25.8283
7.15897
0.954673
23.7762
14.5397
37.4821
47.4364
22.8556
8.97046
15.2922
0.12771
15.6869
0.968147
17.4409
23.9927
3.47896
3.47146
17.9047
24.2282
22.7536
3.15561
28.2172
24.0912
5.17649
7.49054
19.164
15.6793
34.181
20.1132
34.0097
9.40162
22.5836
33.0192
44.3547
45.5353
46.3449
45.1914
44.3996
4.01578
19.5043
10.6938
43.3131
31.6661
16.7562
23.6545
16.9239
25.7951
13.2729
21.8263
25.7398
26.5461
23.9752
33.0865
26.1977
29.199
27.0074
10.7231
2.54524
27.7636
20.4651
26.1932
0.836033
16.9063
12.1803
7.29827
12.462
11.2934
15.335
4.03461
17.1046
38.6922
14.902
21.4142
25.2928
3.95371
5.97519
22.24
8.23416
22.4674
39.9295
22.7179
24.1666
16.1314
9.37748
1.81219
11.9631
18.0162
31.4036
0.0586544
1.06274
4.23085
10.3902
17.832
16.8512
14.4969
19.2109
8.40567
5.84025
8.98614
4.42125
9.14309
25.9505
24.3434
15.1417
23.8349
38.8095
21.6009
19.6224
20.3319
2.55282
44.8774
39.8962
61.736
31.4356
17.5218
9.57422
14.5207
42.9713
29.4654
32.4852
1.97396
11.5666
12.1766
15.5967
27.9092
29.1658
25.4754
4.85911
8.6481
21.9801
6.50648
9.04781
17.3584
15.4074
27.9257
9.63096
28.6089
27.4988
10.0563
12.082
31.9377
6.21471
17.0149
29.7431
17.5637
32.2416
29.6746
4.67236
18.8779
22.8915
22.3902
6.62658
16.3289
27.049
44.4951
44.7365
31.2641
18.2758
6.73369
4.19453
4.99175
1.37843
22.768
32.3921
0.0529573
4.0338
20.7991
4.0553
2.01042
14.9329
28.9072
0.345731
28.4483
22.938
14.8577
31.3539
29.6806
14.6075
35.4273
17.1468
15.3053
17.0065
34.5193
33.5944
34.0495
29.8233
5.10727
6.43366
0.39795
57.1571
12.3962
32.5153
12.0101
17.3018
32.2123
16.6095
29.2704
14.2068
26.3706
28.9298
26.5089
16.1736
28.3085
8.89184
18.7593
9.9188
15.7635
8.273
39.6136
21.718
7.08298
15.7295
1.52405
12.4941
21.0535
16.2145
16.7815
13.7747
24.1256
15.9998
4.03011
13.454
6.56115
26.898
37.1612
17.2119
40.1707
43.5832
33.9097
6.67019
10.1258
3.41609
20.99
9.10172
23.7907
32.943
4.65991
17.032
8.24467
13.0923
16.561
21.4847
30.2725
23.5763
16.6271
21.9756
39.1217
28.2553
31.302
38.3569
12.084
34.5275
16.3414
42.2973
36.6048
19.6314
23.249
46.6505
14.4341
6.07834
21.6804
2.8472
49.4138
6.47436
4.60975
5.61043
22.3905
29.5941
25.2989
30.084
36.9397
29.8741
9.03119
10.6715
7.67529
18.1659
11.8178
5.25652
25.17
17.8442
4.84692
28.4921
16.6533
21.4866
1.82477
1.20263
17.1925
25.2836
14.2498
15.2883
18.9723
18.1441
16.8378
0.713934
5.14848
14.2707
23.4785
17.2683
29.718
23.833
8.11818
23.2817
33.5056
23.4927
11.7078
10.3539
21.1923
6.20033
21.3375
15.4458
7.11715
1.22353
19.0189
4.5534
11.2247
21.4763
19.1509
16.6574
31.1952
16.8646
28.1491
34.1844
39.9871
27.7995
6.38729
22.0176
14.5001
34.9418
1.32879
2.08667
35.7117
16.9125
29.2402
45.1982
28.8274
23.6907
21.6804
8.16585
20.8646
19.0337
23.9081
17.9757
33.1924
17.2241
5.16884
6.14928
26.8102
33.4587
7.87257
17.7668
18.3325
12.0279
12.5326
9.29928
18.532
9.88751
5.12308
7.45195
36.9229
9.1304
17.3722
3.87701
49.9061
27.7561
6.03506
11.6108
9.54855
17.009
29.718
7.90944
24.3124
32.672
23.6403
44.1045
15.235
5.93386
1.29124
22.2929
28.8646
15.4458
1.68492
3.95468
15.1536
0.049565
9.92306
19.221
37.0421
33.163
16.561
24.6431
23.5662
25.3732
35.1249
28.434
51.3597
29.1005
13.4081
33.51
21.715
16.8967
24.7979
35.9852
23.6525
30.018
33.975
15.2691
1.95156
19.2209
16.9802
7.87948
15.1215
11.2628
19.4866
30.084
34.8275
18.5637
7.66735
7.85933
44.2447
14.073
4.38547
10.9953
5.89514
0.0868016
1.46107
6.07369
25.4478
14.9352
9.19684
2.92341
35.548
30.7874
11.526
30.4273
49.9061
5.77584
10.0752
18.3867
6.95965
5.60952
33.3119
27.6277
12.0132
26.6969
29.4209
24.0658
27.4165
20.4487
0.00975388
0.287886
6.53107
24.303
22.4495
11.7764
5.49182
1.50614
5.62583
3.83615
30.0944
3.22417
19.1509
37.8855
30.0006
8.00358
50.2369
19.8001
32.3706
18.359
5.89558
24.7194
4.90535
20.6104
16.9966
19.3031
32.0596
25.803
16.9796
18.7097
35.8379
4.53001
27.3809
13.823
34.5239
15.8053
22.0943
7.68036
17.9757
34.7406
25.3478
5.37304
8.37352
38.7653
25.067
4.27249
17.7668
23.2245
4.50492
5.70915
8.99866
10.474
14.6327
12.7603
31.8323
35.3237
4.13845
17.084
30.4273
9.20881
0.0867768
19.9947
15.6982
13.1255
28.7166
41.0299
12.1162
28.832
26.4145
8.97546
30.0859
16.4559
11.7157
28.5095
6.86809
23.9976
22.4495
25.5699
2.74914
7.55471
9.85937
19.221
20.3228
36.1322
16.1093
31.154
26.9173
29.3237
19.9312
19.9131
39.7723
11.5039
29.018
15.7044
15.1024
38.176
22.3474
15.6421
50.0512
35.193
17.6552
20.6021
8.43025
20.5908
12.3136
33.1751
7.83416
25.6752
0.84161
34.8275
13.7707
25.0445
10.2184
28.09
26.7798
2.72741
10.9953
20.2403
22.663
10.1425
11.3857
29.0243
5.50562
12.7603
31.8323
25.4978
26.2005
8.65995
41.3278
1.39996
4.67357
26.7188
5.60952
29.3432
21.6761
13.2428
37.1893
23.632
7.0583
30.0859
27.6577
6.92552
12.3356
6.86809
24.8969
11.7764
4.17898
8.18759
1.19396
3.83615
30.0944
46.8271
0.117112
50.6252
39.3536
50.2369
12.4011
35.5772
18.359
34.8775
3.2777
2.08135
34.3564
17.9404
5.08646
24.7892
26.8916
25.7351
31.7409
14.234
9.35071
0.061435
30.6028
12.2428
26.2164
28.3071
25.751
28.8871
34.7406
22.4103
1.64804
23.1129
10.036
19.7996
1.13237
27.8339
14.5582
6.85126
2.99343
23.0949
6.70831
25.5464
20.681
7.54698
6.44488
26.7898
13.1255
5.54
17.1637
1.31146
33.7585
4.73323
5.51033
7.32558
20.1374
25.5699
3.08719
11.1492
25.4998
20.3228
36.1322
8.35055
38.6472
28.0046
12.4011
26.1423
19.9312
39.6113
28.7361
9.51289
1.5436
22.6598
9.83916
16.5148
6.8643
19.2122
45.9839
17.6552
10.5589
17.1015
27.5106
10.688
21.1045
[truncated: 215 more rows]

## Sheet: Fig6S1A-B_PoleGrowthDensity
Figure6_S1A			Figure6_S1B
Pole widths			Old poles
Old poles	New poles		Growth (µm)	Density (mg/ml)	Pole width (µm)
3.98822	4.27489		3.02171	294.316	3.98822
4.18312	3.8386		3.96183	291.48	3.95457
4.11901	3.97574		4.29333	278.377	4.04487
3.95457	4.151		3.90299	273.457	3.94638
3.77066	4.09645		3.04861	285.954	3.98365
4.04487	3.83957		5.60359	269.668	3.98954
3.88683	3.9922		4.68971	264.293	4.04947
3.84045	4.13809		4.56128	266.033	3.95143
4.15082	3.93952		0.605125	312.875	3.9649
3.94638	3.87026		4.59434	264.093	3.996
3.78503	4.13113		4.93476	277.947	3.95787
3.98365	4.24083		4.95481	253.97	3.92907
3.84332	4.04397		4.49238	269.919	4.05014
3.98954	3.96549		2.20941	282.935	3.94297
3.75639	4.07312		4.26568	266.025	4.02546
3.80953	3.95761		4.44814	267.702	3.91123
3.88916	4.30421		4.28957	259.213	3.95678
3.76254	4.29164		4.71025	285.656	4.00073
3.6192	4.31598		4.78046	273.188	3.9643
3.87632	4.05612		4.3549	277.625	3.95044
4.10606	4.26402		3.10961	264.72	4.02586
4.177	3.82789		4.74306	256.575	3.98269
4.04947	3.78545		3.9057	274.446	3.94932
3.95143	3.89664		3.43577	269.781	3.9693
3.83591	4.21119		4.00392	278.002	3.98006
3.84592	4.15437		4.42423	296.586	4.0134
3.78877	4.00241		4.58762	265.19	4.04775
3.9649	3.96526		2.72964	291.684	3.95981
3.61577	4.17621		4.63817	267.229	4.01001
3.996	4.12609		4.36746	280.345	3.94227
4.11313	4.05902		4.90866	264.215	3.95454
3.81142	4.17787		3.75118	286.54	4.01089
3.81915	3.86391		5.30063	280.148	4.00475
4.10599	3.95584
3.78773	4.36068		New poles
3.95787	4.49747		1.31908	305.615	3.97574
3.89899	4.38405		1.52567	287.848	4.09645
3.92907	4.29687		3.39574	288.876	3.9922
4.05014	3.99716		2.17383	297.331	3.93952
3.88675	4.07562		3.49135	287.216	4.04397
3.94297	4.15532		1.82926	293.178	3.96549
4.02546	4.22438		4.89525	288.509	4.07312
3.87083	4.28504		2.35036	276.273	3.95761
3.91123	4.08782		1.4515	284.773	4.05612
3.82151	4.17728		0.44664	283.273	4.00241
3.95678	4.24714		5.57094	283.93	3.96526
3.80467	4.03356		5.41016	279.991	4.05902
4.00073	3.92806		2.15901	291.34	3.95584
3.78992	3.98899		2.53803	286.963	3.99716
3.9643	3.922		1.17323	277.732	4.07562
3.95044	4.19562		1.81369	282.584	4.08782
3.83317	4.13553		1.90964	285.188	4.03356
4.02586	3.75073		2.90706	287.013	3.92806
3.98269	3.90597		2.26852	291.799	3.98899
3.94932	4.25046		2.0023	280.618	3.922
3.9693	4.28293		2.41576	272.614	3.90597
3.98006	4.03377		1.25652	297.317	4.03377
4.0134	4.28846		2.87055	275.439	4.06396
3.84106	4.06396		1.15005	275.737	4.01634
4.04775	4.01634		1.2776	293.812	3.97234
4.12862	3.84071		0.952838	287.565	4.01757
3.95981	4.23624		0.84601	284.8	3.91586
4.01001	4.34255		2.78889	286.297	4.0824
4.22949	3.97234		4.90656	294.468	3.99054
3.88498	4.19582
3.76367	4.47293
4.10521	4.28789
3.69044	4.01757
3.94227	4.2811
3.8243	4.18411
3.82756	4.16883
3.77868	4.13249
3.89839	3.91586
3.95454	3.88276
3.85021	3.89231
4.01089	4.0824
3.71977	3.99054
4.00475	3.8844

## Sheet: Fig6S2_OE_NE_FITC
No RNAse
Intensity	Condition		Profile intensity
0.983068	NE		Value 0	Value 1	Value 2	Value 3	Value 4	Value 5	Value 6	Value 7	Value 8	Value 9	Value 10	Value 11	Value 12	Value 13	Value 14	Value 15	Value 16	Value 17	Value 18	Value 19	Value 20	Value 21	Value 22	Value 23	Value 24	Value 25	Value 0	Value 1	Value 2	Value 3	Value 4	Value 5	Value 6	Value 7	Value 8	Value 9	Value 10	Value 11	Value 12	Value 13	Value 14	Value 15	Value 16	Value 17	Value 18	Value 19	Value 20
0.990579	NE		0	0.000987972	0.00207404	0.0208104	0.0226821	0	0	0	0.0561797	0.102309	0.00785792	0	0.0162301	0.00319062	0.00331042	0	0	0.00767499	0	0	0	0.0224883	0	0.0173203	0	0.0629379	0	0.000832247	0.0811926	0	0.00162768	0.0117014	0	0	0.0168583	0	0.0555558	0.0299913	0.0166418	0.0258346	0	0.0103167	0	0.110516	0	0	0.0233946
0.952473	NE		0.00661394	0.00899807	0.0487758	0.0754264	0.0883154	0.075367	0.0539846	0.197972	0.216732	0.25915	0.0787495	0.147053	0.173259	0.197211	0.140487	0.152274	0.153886	0.0673094	0.13288	0.184898	0.15336	0.125221	0.0562292	0.072487	0.0894122	0.231183	0.0327711	0.0408997	0.256988	0.126745	0.0334157	0.0806982	0.0440856	0.0378138	0.161474	0.12666	0.103744	0.0626906	0.0225905	0.188638	0.117049	0.198581	0.0550652	0.284525	0.0636742	0.0487818	0.0603528
0.978577	NE		0.0207566	0.0306822	0.142604	0.184379	0.203204	0.203909	0.16336	0.402391	0.397092	0.420396	0.211391	0.335588	0.320315	0.387966	0.313531	0.334165	0.324348	0.176573	0.309633	0.371051	0.343518	0.278296	0.171936	0.173402	0.246449	0.397838	0.103173	0.118066	0.40837	0.306414	0.0961735	0.196288	0.142409	0.109654	0.337352	0.312857	0.183981	0.117145	0.104479	0.377249	0.302521	0.346571	0.172273	0.46368	0.195538	0.154248	0.133817
0.976847	NE		0.0527873	0.0853975	0.268787	0.339552	0.359238	0.372612	0.325171	0.536904	0.534137	0.556963	0.374873	0.49546	0.485365	0.524041	0.469245	0.486279	0.45951	0.320022	0.48996	0.500495	0.510293	0.426123	0.314279	0.3127	0.422743	0.517906	0.21673	0.243593	0.533244	0.471478	0.200258	0.352832	0.284708	0.235459	0.492994	0.48135	0.288643	0.203249	0.251439	0.530616	0.48436	0.432084	0.318819	0.603184	0.326336	0.303618	0.253056
0.965784	NE		0.131871	0.194594	0.412228	0.4981	0.505954	0.521841	0.491945	0.616084	0.654362	0.646049	0.512474	0.629754	0.606989	0.631083	0.577363	0.606723	0.555251	0.454189	0.624003	0.572469	0.634066	0.549411	0.445019	0.420587	0.57124	0.606514	0.354856	0.384	0.629162	0.601616	0.329016	0.509666	0.438689	0.392154	0.595188	0.610578	0.403534	0.308267	0.429002	0.647758	0.632504	0.473333	0.448132	0.698106	0.442205	0.460022	0.398749
0.965479	NE		0.276442	0.342373	0.53033	0.617066	0.611152	0.626692	0.602753	0.631962	0.725748	0.72585	0.621536	0.724169	0.689696	0.68014	0.659651	0.698074	0.627876	0.56269	0.702894	0.618043	0.705875	0.623844	0.542177	0.496519	0.656709	0.66049	0.476977	0.515938	0.697768	0.699335	0.446009	0.616012	0.564782	0.528168	0.670102	0.691512	0.495693	0.41211	0.575836	0.713835	0.720353	0.497118	0.54909	0.760446	0.527719	0.580372	0.534783
0.977828	NE		0.458094	0.476042	0.621111	0.718667	0.6877	0.679544	0.689921	0.627611	0.774123	0.78047	0.704621	0.782202	0.765125	0.684485	0.713659	0.755057	0.69306	0.633934	0.765526	0.641756	0.763811	0.686845	0.623578	0.542344	0.713876	0.681664	0.574378	0.605152	0.729334	0.772488	0.534368	0.693271	0.657751	0.604726	0.703722	0.755169	0.564743	0.502107	0.674372	0.758382	0.7829	0.511734	0.627985	0.813928	0.597903	0.667082	0.635856
0.984976	NE		0.606936	0.572294	0.695109	0.770289	0.748034	0.708227	0.760079	0.630056	0.830009	0.817642	0.764931	0.829213	0.809454	0.69393	0.769279	0.784883	0.761647	0.687154	0.811547	0.647125	0.805641	0.729853	0.682368	0.587403	0.746864	0.71345	0.64012	0.660623	0.7589	0.824949	0.586443	0.767337	0.718776	0.674774	0.739772	0.806058	0.624337	0.578519	0.756134	0.803781	0.822218	0.547166	0.705275	0.850764	0.633293	0.729363	0.707362
0.98848	NE		0.715197	0.648697	0.751105	0.802844	0.793444	0.736176	0.82258	0.680641	0.854147	0.848156	0.805776	0.839988	0.843291	0.696994	0.811156	0.794379	0.825275	0.72239	0.83867	0.667282	0.851235	0.770482	0.745181	0.643526	0.774153	0.728072	0.689151	0.717573	0.780549	0.869477	0.612101	0.831664	0.771071	0.71124	0.777246	0.83953	0.677226	0.657491	0.824932	0.834498	0.840719	0.588928	0.76061	0.892511	0.667289	0.794411	0.750917
0.936301	NE		0.791702	0.706264	0.798595	0.823007	0.833089	0.756047	0.86785	0.759427	0.868651	0.87561	0.83581	0.859923	0.874641	0.689135	0.8507	0.793734	0.86177	0.748388	0.865357	0.655407	0.873238	0.797776	0.786987	0.702081	0.797954	0.747681	0.745473	0.750541	0.798057	0.891935	0.643868	0.868588	0.822044	0.734177	0.776814	0.836983	0.734604	0.707717	0.885399	0.854689	0.863492	0.665995	0.810238	0.926404	0.698086	0.852954	0.78713
0.993659	NE		0.833655	0.751351	0.839565	0.843282	0.852216	0.782407	0.901322	0.852845	0.878236	0.891844	0.848598	0.876459	0.887333	0.693569	0.862821	0.750581	0.895323	0.762713	0.875798	0.667805	0.889765	0.836323	0.843531	0.763132	0.822795	0.775399	0.778275	0.789543	0.819321	0.912834	0.695685	0.90567	0.869966	0.769823	0.802153	0.843345	0.784335	0.761258	0.910086	0.865518	0.878198	0.748058	0.85197	0.955966	0.742216	0.878781	0.806937
0.984902	NE		0.868967	0.810856	0.868184	0.853362	0.881211	0.804222	0.924423	0.8999	0.888092	0.899718	0.878472	0.898885	0.906712	0.72388	0.873377	0.713172	0.923451	0.779476	0.888638	0.712935	0.901335	0.870057	0.868063	0.81411	0.832459	0.819052	0.820123	0.802248	0.816525	0.926711	0.749471	0.925512	0.890503	0.78599	0.798794	0.854388	0.816544	0.79082	0.934446	0.880631	0.8925	0.825265	0.885163	0.958643	0.765353	0.908215	0.824776
0.950531	NE		0.893279	0.845025	0.880275	0.865965	0.903007	0.833793	0.935287	0.932313	0.884269	0.914161	0.882026	0.88935	0.921803	0.77259	0.880662	0.690483	0.952203	0.806662	0.903447	0.769202	0.9043	0.887104	0.880827	0.849842	0.837436	0.85384	0.861597	0.813516	0.811884	0.943771	0.804048	0.959649	0.926688	0.80262	0.806302	0.876835	0.839005	0.825049	0.948522	0.888754	0.903653	0.877629	0.92084	0.958521	0.807235	0.930274	0.848783
0.944969	NE		0.920839	0.867256	0.90309	0.852567	0.917492	0.845465	0.953234	0.968423	0.883648	0.915351	0.902084	0.904595	0.936315	0.80966	0.88856	0.702306	0.978835	0.825835	0.912918	0.827149	0.923739	0.901992	0.893676	0.879999	0.849604	0.875994	0.873616	0.809188	0.81604	0.959016	0.843484	0.972992	0.938016	0.822459	0.811325	0.893989	0.868101	0.851037	0.961036	0.901715	0.926796	0.918846	0.931205	0.959124	0.83674	0.924913	0.875667
0.958497	NE		0.924113	0.890748	0.913757	0.843296	0.922508	0.868504	0.959867	0.971608	0.876151	0.923135	0.912473	0.931395	0.942542	0.86388	0.907992	0.733469	0.989295	0.849455	0.905725	0.882078	0.935056	0.915478	0.913321	0.909352	0.842938	0.893587	0.887689	0.808146	0.812883	0.942426	0.85689	0.969779	0.93992	0.845865	0.817141	0.899179	0.890359	0.881715	0.96403	0.905235	0.930712	0.930411	0.936728	0.969325	0.841804	0.947064	0.87851
0.97558	NE		0.922244	0.91658	0.909264	0.861682	0.935719	0.905753	0.964039	0.96916	0.866647	0.925393	0.935365	0.945131	0.960376	0.894704	0.934572	0.765554	0.991588	0.874347	0.902556	0.916248	0.932994	0.934015	0.923729	0.930492	0.820872	0.91288	0.896903	0.803659	0.81477	0.944736	0.830897	0.977715	0.963906	0.867584	0.83231	0.908608	0.897711	0.906417	0.977019	0.910146	0.950285	0.952466	0.942807	0.972556	0.8615	0.947014	0.878553
0.990969	NE		0.930933	0.920901	0.927551	0.878472	0.950522	0.942839	0.968308	0.9648	0.877065	0.933844	0.95025	0.956647	0.967644	0.911842	0.939899	0.826257	0.986292	0.889081	0.906548	0.944381	0.937091	0.924025	0.932096	0.940494	0.810497	0.91802	0.903169	0.812972	0.821242	0.949148	0.810512	0.968728	0.966357	0.889909	0.844157	0.899819	0.910073	0.913246	0.979751	0.907089	0.955131	0.974575	0.95309	0.987289	0.885705	0.962608	0.878453
0.968845	NE		0.939558	0.932901	0.944775	0.891568	0.958891	0.947417	0.98909	0.971195	0.899103	0.928389	0.951553	0.970333	0.961786	0.924481	0.938929	0.881086	0.982509	0.891843	0.896285	0.944471	0.957175	0.911637	0.923835	0.942455	0.818329	0.934224	0.92463	0.813738	0.845975	0.960342	0.787406	0.965838	0.961234	0.895748	0.855965	0.896978	0.930052	0.928926	0.986392	0.916057	0.959445	0.979279	0.966699	0.999631	0.890029	0.963304	0.874361
0.970731	NE		0.931864	0.933434	0.948938	0.888182	0.979732	0.952101	0.996127	0.974822	0.909785	0.932404	0.949764	0.980324	0.9644	0.94971	0.948041	0.911501	0.99142	0.890749	0.90544	0.941463	0.948635	0.913602	0.916547	0.946779	0.821576	0.935538	0.932518	0.809853	0.86993	0.968685	0.7941	0.976725	0.963689	0.906936	0.89744	0.906031	0.937086	0.929751	0.990579	0.941202	0.993383	0.977439	0.95895	0.997762	0.903041	0.972034	0.87816
0.97017	NE		0.928865	0.914591	0.95757	0.849632	0.989734	0.958635	0.993342	0.986567	0.921555	0.934309	0.946412	0.984847	0.961208	0.968831	0.964627	0.950111	0.981784	0.905452	0.91725	0.937984	0.952373	0.904146	0.895602	0.934478	0.838188	0.943118	0.942398	0.813275	0.879751	0.97251	0.80899	0.970112	0.960813	0.915648	0.908978	0.906965	0.948399	0.937336	1	0.965986	0.991951	0.980495	0.960995	0.982064	0.909916	0.972231	0.870218
0.964245	NE		0.932399	0.882425	0.955036	0.825352	0.996791	0.964287	0.986689	0.97847	0.920286	0.932523	0.951663	0.977578	0.96782	0.986856	0.981802	0.940291	0.977646	0.902312	0.920924	0.935269	0.963548	0.912697	0.882626	0.927191	0.852068	0.940168	0.954387	0.809945	0.89438	0.97883	0.831728	0.966011	0.965745	0.92769	0.907052	0.903136	0.943412	0.952246	0.979177	0.984728	0.994635	0.972595	0.959302	0.982214	0.918336	0.974471	0.873773
0.962218	NE		0.927953	0.869804	0.951349	0.775562	1	0.972527	0.987742	0.992932	0.920212	0.928742	0.940522	0.985943	0.952823	1	0.989769	0.933093	0.974729	0.905045	0.922316	0.940873	0.964633	0.912077	0.873721	0.927439	0.872194	0.948743	0.966863	0.829923	0.895114	0.989557	0.866731	0.94975	0.946085	0.924835	0.916708	0.890482	0.943458	0.965302	0.970081	0.976473	1	0.959792	0.955152	0.972433	0.925699	0.965784	0.882113
0.97041	NE		0.923721	0.867989	0.945987	0.744654	0.992465	0.987799	0.981749	0.989143	0.916913	0.920319	0.940193	0.986654	0.933721	0.988923	0.992301	0.912029	0.970651	0.893012	0.919782	0.927348	0.967643	0.894863	0.871797	0.943321	0.891425	0.96127	0.979371	0.842714	0.907624	0.977043	0.884321	0.93267	0.912818	0.925642	0.923964	0.866861	0.94193	0.962211	0.948582	0.952109	0.992176	0.948297	0.95129	0.937839	0.951768	0.961459	0.894916
0.960712	NE		0.915856	0.861463	0.950398	0.738815	0.975898	0.982251	0.982014	0.997907	0.927748	0.902713	0.937329	0.977686	0.92361	0.977047	0.991376	0.892178	0.974043	0.876801	0.926804	0.932456	0.967021	0.885722	0.867389	0.949557	0.904732	0.968969	0.972879	0.842121	0.917868	0.959047	0.891499	0.913776	0.897702	0.923288	0.925223	0.845873	0.940041	0.943167	0.927241	0.935129	0.97911	0.957244	0.936811	0.923656	0.954367	0.930308	0.906376
0.969715	NE		0.904857	0.872673	0.951636	0.764438	0.965458	0.9775	0.979374	0.986307	0.942206	0.878107	0.943892	0.966273	0.905381	0.972142	0.99144	0.870726	0.957077	0.85742	0.911609	0.948414	0.940624	0.884107	0.860433	0.952807	0.909362	0.973891	0.972416	0.83695	0.912021	0.956207	0.892233	0.917761	0.885699	0.919269	0.927486	0.830138	0.936711	0.940995	0.895054	0.920444	0.971968	0.974029	0.928492	0.907731	0.953466	0.896823	0.900564
0.925634	OE		0.863872	0.871455	0.950993	0.838685	0.961825	0.970708	0.970942	0.973963	0.962376	0.86065	0.955576	0.943399	0.888339	0.956513	0.997378	0.846356	0.927957	0.827149	0.892764	0.958233	0.896809	0.877248	0.863713	0.958309	0.898665	0.984004	0.973354	0.833242	0.91273	0.923584	0.894778	0.913231	0.874173	0.92918	0.927722	0.80642	0.934089	0.946053	0.878431	0.897517	0.960696	0.991166	0.932685	0.887774	0.966551	0.867554	0.911388
0.886047	OE		0.837758	0.900589	0.946247	0.89629	0.950034	0.962656	0.952395	0.976916	0.964947	0.838721	0.964278	0.918127	0.884249	0.945202	1	0.828543	0.889328	0.81586	0.892619	0.969844	0.875713	0.869269	0.869614	0.96104	0.890211	0.9858	0.960208	0.808036	0.905313	0.889201	0.884941	0.912488	0.872769	0.936711	0.934778	0.791469	0.918521	0.926423	0.833376	0.871583	0.948736	0.983466	0.923014	0.8656	0.97314	0.844127	0.906357
0.950377	OE		0.819793	0.92374	0.944173	0.913326	0.936137	0.943281	0.935095	0.96662	0.946593	0.828009	0.964319	0.898265	0.862761	0.917977	0.988821	0.830528	0.855823	0.813408	0.871504	0.974341	0.846003	0.864946	0.863109	0.949508	0.884032	0.978976	0.957922	0.789869	0.893141	0.854269	0.876404	0.895038	0.870965	0.948408	0.953953	0.784517	0.902921	0.92373	0.824628	0.861597	0.922626	0.987309	0.924359	0.853699	0.971251	0.828936	0.910617
0.836203	OE		0.816622	0.947998	0.942402	0.906061	0.915382	0.931701	0.927063	0.963594	0.922348	0.820925	0.952979	0.873393	0.845625	0.872033	0.969893	0.832479	0.82584	0.821622	0.861158	0.983254	0.815501	0.865633	0.857501	0.949116	0.872968	0.992556	0.948537	0.782628	0.910521	0.82981	0.867257	0.886656	0.859103	0.946259	0.961495	0.780891	0.89663	0.921564	0.817337	0.846885	0.922256	0.991177	0.913809	0.848126	0.963627	0.827587	0.916526
0.961985	OE		0.825918	0.975918	0.931547	0.891688	0.885702	0.941849	0.899728	0.972283	0.904547	0.824148	0.947028	0.867544	0.840926	0.833169	0.949635	0.837432	0.823737	0.821628	0.840028	0.974139	0.809913	0.857675	0.857396	0.941262	0.854215	1	0.948868	0.780283	0.918594	0.831477	0.854551	0.883076	0.862218	0.93852	0.949965	0.775472	0.883585	0.931455	0.830987	0.854328	0.893747	0.983494	0.897562	0.852169	0.953515	0.840546	0.930943
0.960083	OE		0.84217	0.997047	0.933599	0.876599	0.857929	0.944504	0.870832	0.947336	0.894552	0.823395	0.936592	0.859277	0.837703	0.826548	0.9132	0.849899	0.81069	0.814373	0.820168	0.9768	0.805723	0.849972	0.860153	0.936702	0.846582	0.988978	0.946732	0.790693	0.928288	0.816618	0.869483	0.870066	0.879055	0.942767	0.953089	0.781814	0.882192	0.934313	0.876869	0.867717	0.878586	0.993737	0.886054	0.858082	0.94258	0.845593	0.930361
0.952147	OE		0.885134	0.990035	0.94131	0.875902	0.848699	0.946137	0.839464	0.947181	0.89116	0.828574	0.915741	0.857175	0.832081	0.812607	0.897441	0.837885	0.811714	0.808492	0.825808	0.977684	0.795081	0.839383	0.864353	0.927592	0.843752	0.975754	0.940278	0.786651	0.931612	0.827022	0.899154	0.859097	0.893403	0.96819	0.96032	0.771736	0.873188	0.936748	0.922931	0.869334	0.859612	0.997551	0.864576	0.862996	0.9286	0.844703	0.899464
0.983203	OE		0.912348	0.98349	0.947702	0.875628	0.854539	0.956013	0.823002	0.957855	0.884589	0.84019	0.909388	0.849614	0.847287	0.800962	0.881825	0.843679	0.801837	0.804323	0.823014	0.974279	0.777371	0.830356	0.861738	0.933301	0.840668	0.948021	0.932952	0.797981	0.936746	0.824533	0.908837	0.828001	0.897334	0.964639	0.952632	0.772264	0.86751	0.942868	0.951533	0.862093	0.848915	1	0.835947	0.866032	0.905522	0.836359	0.877148
0.902093	OE		0.9161	0.970353	0.953484	0.877065	0.84778	0.972898	0.822224	0.956304	0.869902	0.835398	0.895695	0.847556	0.836101	0.789888	0.86772	0.840726	0.798925	0.809059	0.813413	0.962426	0.786323	0.825843	0.84503	0.921799	0.843546	0.909801	0.911169	0.81016	0.945022	0.821452	0.942869	0.801264	0.893809	0.9465	0.956128	0.794166	0.864664	0.945447	0.969175	0.848238	0.843018	0.974993	0.817947	0.87688	0.882953	0.847582	0.873123
0.93	OE		0.919656	0.963711	0.940032	0.884292	0.854244	0.984446	0.8423	0.966899	0.868617	0.833197	0.880814	0.848244	0.845334	0.792075	0.863195	0.836221	0.80312	0.806509	0.805911	0.929777	0.787449	0.816349	0.840216	0.93069	0.838575	0.875442	0.869644	0.811821	0.943898	0.813036	0.951952	0.793507	0.902161	0.941399	0.955174	0.79654	0.871278	0.924661	0.971722	0.85207	0.833663	0.951833	0.801309	0.888206	0.85982	0.847762	0.845891
0.945961	OE		0.914988	0.973572	0.921864	0.881315	0.847554	0.994275	0.862987	0.984392	0.860642	0.835704	0.858681	0.858481	0.844375	0.794814	0.856867	0.825249	0.792224	0.816508	0.803063	0.910046	0.819023	0.823492	0.820749	0.942296	0.837336	0.846057	0.848712	0.808655	0.9462	0.808117	0.935874	0.79126	0.904481	0.916256	0.96027	0.794052	0.873367	0.934525	0.979869	0.870597	0.835238	0.917183	0.804189	0.891396	0.849245	0.8527	0.833845
0.973432	OE		0.917151	0.979638	0.892535	0.883832	0.851662	1	0.895443	0.989687	0.850579	0.846455	0.84851	0.85912	0.857503	0.798516	0.866715	0.818243	0.791601	0.821364	0.805036	0.8999	0.830927	0.823286	0.801466	0.943439	0.825566	0.831408	0.82666	0.812676	0.94114	0.81045	0.931849	0.794092	0.910234	0.900575	0.976028	0.80192	0.869341	0.930667	0.977593	0.877424	0.837786	0.899467	0.802384	0.903281	0.826322	0.855649	0.824618
0.95551	OE		0.913634	0.96835	0.871534	0.876515	0.856895	0.999107	0.931656	0.997351	0.845567	0.840417	0.835724	0.866759	0.866719	0.789723	0.864076	0.820084	0.804617	0.811286	0.822009	0.893331	0.849571	0.809324	0.79878	0.946209	0.83191	0.807615	0.84097	0.831665	0.939077	0.796449	0.908495	0.798037	0.91877	0.878128	0.995908	0.810173	0.864096	0.931076	0.968769	0.887097	0.836764	0.890875	0.802823	0.918998	0.832625	0.865332	0.819562
0.928615	OE		0.910196	0.940946	0.863963	0.864542	0.855402	0.996111	0.965138	0.983111	0.846726	0.856331	0.842338	0.872922	0.888445	0.792717	0.854566	0.854888	0.817497	0.811828	0.839553	0.888015	0.858401	0.81597	0.831715	0.935301	0.83509	0.800622	0.859824	0.851901	0.939272	0.782455	0.89115	0.794819	0.913452	0.864803	0.987428	0.813414	0.866926	0.937944	0.952197	0.885868	0.824423	0.881113	0.801333	0.929902	0.826465	0.87601	0.816006
0.931803	OE		0.899019	0.917924	0.863578	0.863089	0.863026	0.997736	0.989526	0.955777	0.85079	0.87745	0.839472	0.874101	0.904091	0.791583	0.851776	0.886406	0.84143	0.82219	0.866915	0.869767	0.857829	0.82739	0.859227	0.915474	0.82959	0.793813	0.883226	0.880152	0.936823	0.776917	0.911753	0.793321	0.913256	0.842906	0.992377	0.818255	0.8664	0.933662	0.941634	0.89024	0.829553	0.852799	0.797472	0.929223	0.831454	0.882114	0.810718
0.803362	OE		0.898957	0.898945	0.845803	0.856952	0.866221	0.986952	1	0.930474	0.853268	0.882594	0.839279	0.880141	0.93799	0.78708	0.857589	0.920373	0.872646	0.826078	0.900106	0.866627	0.844713	0.853286	0.905828	0.896151	0.829838	0.791667	0.8844	0.910725	0.922382	0.781893	0.903757	0.80256	0.909416	0.838698	0.988143	0.834812	0.873485	0.945624	0.930706	0.910315	0.827301	0.862847	0.793454	0.931537	0.836541	0.883872	0.825086
0.986656	OE		0.886795	0.876155	0.852449	0.85001	0.879645	0.98587	0.980711	0.912981	0.855343	0.910081	0.845375	0.874889	0.967291	0.800152	0.874367	0.938853	0.900175	0.835068	0.935234	0.86547	0.848089	0.868929	0.957577	0.869863	0.84007	0.787492	0.876666	0.935146	0.900456	0.780225	0.895286	0.823623	0.91348	0.832427	0.995339	0.83635	0.874929	0.935299	0.908923	0.94154	0.807302	0.856976	0.786818	0.951269	0.822717	0.903849	0.810607
0.89398	OE		0.880568	0.877727	0.850662	0.853422	0.886305	0.970521	0.959313	0.883188	0.860741	0.924865	0.852785	0.896269	0.990143	0.826941	0.901923	0.9538	0.910577	0.843888	0.963602	0.862009	0.845025	0.895509	0.979138	0.842964	0.855303	0.778621	0.855223	0.955066	0.895372	0.775731	0.903624	0.825185	0.899048	0.828366	0.983175	0.82845	0.867629	0.918206	0.910838	0.982143	0.799805	0.85531	0.788104	0.969651	0.83323	0.913682	0.798093
0.911388	OE		0.877495	0.860943	0.843803	0.855927	0.891667	0.951412	0.929601	0.866694	0.8517	0.952405	0.848126	0.915574	1	0.852304	0.915579	0.97886	0.922316	0.849624	0.9868	0.873249	0.845373	0.903912	0.987689	0.831644	0.875475	0.78383	0.822606	0.959293	0.870094	0.774066	0.897604	0.840857	0.900223	0.823634	0.96352	0.840685	0.873102	0.924747	0.906962	0.986043	0.797196	0.840946	0.798797	1	0.849507	0.938383	0.797732
0.947196	OE		0.881805	0.856621	0.850348	0.876409	0.900287	0.931121	0.909766	0.855575	0.870726	0.977739	0.846359	0.933074	0.999065	0.879781	0.911563	0.996815	0.934144	0.876541	0.993987	0.866699	0.840065	0.911034	0.994887	0.821511	0.894191	0.77397	0.802747	0.965722	0.856961	0.809946	0.889216	0.844312	0.907872	0.832966	0.961219	0.862427	0.882342	0.919088	0.899649	1	0.805533	0.842968	0.815321	0.999518	0.85033	0.961993	0.803828
0.930485	OE		0.875456	0.852131	0.850973	0.894934	0.92043	0.901721	0.884571	0.847085	0.900223	0.990627	0.852951	0.956633	0.988496	0.895303	0.913362	0.994734	0.936622	0.880679	0.983933	0.861191	0.82606	0.919876	1	0.816675	0.92345	0.778389	0.802552	0.976436	0.850446	0.852704	0.901273	0.87423	0.905387	0.8312	0.961548	0.903933	0.883259	0.913906	0.896277	0.999033	0.817593	0.834205	0.826101	0.989264	0.856156	0.973629	0.81114
0.916028	OE		0.868016	0.856502	0.845961	0.923034	0.947764	0.885815	0.865032	0.844493	0.920792	0.989236	0.855745	0.965989	0.979433	0.90089	0.936013	0.970338	0.961331	0.883591	0.979328	0.878882	0.821426	0.933715	0.986135	0.815666	0.9506	0.780447	0.816598	0.988191	0.851541	0.900552	0.899625	0.890011	0.910458	0.821044	0.972961	0.93886	0.89602	0.9241	0.898536	0.990945	0.827195	0.834074	0.840226	0.993573	0.860551	0.986189	0.818869
0.912537	OE		0.863379	0.858544	0.853787	0.939356	0.974944	0.883591	0.84868	0.829432	0.938689	0.996818	0.8709	0.977864	0.971475	0.906694	0.937791	0.961051	0.978813	0.890194	0.980302	0.884993	0.826381	0.951057	0.989118	0.831507	0.973308	0.8102	0.839277	0.994748	0.849447	0.940779	0.882409	0.91544	0.92311	0.810427	0.967658	0.972727	0.902137	0.927093	0.897201	0.988425	0.845256	0.837369	0.874489	0.98726	0.863849	0.985556	0.821439
0.943726	OE		0.871619	0.855654	0.862036	0.931097	0.987462	0.886355	0.852596	0.822617	0.951846	1	0.869217	0.97136	0.979114	0.930882	0.940911	0.942689	0.980178	0.918138	0.984764	0.896685	0.821552	0.960937	0.986952	0.840393	0.98138	0.811322	0.840811	1	0.851204	0.97356	0.879575	0.932918	0.941568	0.811331	0.960304	0.992418	0.915088	0.934782	0.887959	0.979373	0.872352	0.845609	0.916369	0.971266	0.872997	0.996426	0.842009
0.851126	OE		0.863728	0.861262	0.859688	0.936809	0.988643	0.876772	0.851087	0.82389	0.966048	0.991437	0.86695	0.981227	0.991008	0.948378	0.947095	0.937331	0.996533	0.943041	0.991972	0.908979	0.813002	0.960762	0.978629	0.849434	0.990423	0.845448	0.830983	0.999091	0.857903	0.986015	0.878029	0.966133	0.965969	0.810441	0.959214	1	0.943046	0.952163	0.881186	0.957174	0.897482	0.834716	0.952922	0.967964	0.892822	1	0.880985
0.943756	OE		0.855162	0.856298	0.854036	0.928694	0.986423	0.875179	0.851588	0.825191	0.977252	0.985794	0.856867	0.991796	0.999888	0.961562	0.949317	0.944838	1	0.960979	0.987536	0.910101	0.820033	0.956476	0.962518	0.840155	0.998816	0.89042	0.834222	0.994499	0.870273	0.994528	0.883784	0.977999	0.974522	0.816125	0.946442	0.980448	0.956147	0.983787	0.896166	0.956282	0.922864	0.853517	0.972633	0.978028	0.926016	0.988898	0.90869
0.940749	NE		0.876808	0.857486	0.86433	0.940658	0.977375	0.869791	0.857435	0.822653	0.988681	0.98317	0.829825	0.988296	0.986905	0.963981	0.958002	0.975053	0.989624	0.97306	0.981741	0.901799	0.819486	0.948216	0.94134	0.828045	1	0.934359	0.837515	0.982932	0.878186	0.997608	0.890918	0.975192	0.990121	0.823915	0.92003	0.975777	0.963026	0.984449	0.899828	0.958693	0.923939	0.861712	0.986085	0.982276	0.956487	0.988586	0.932177
0.992035	NE		0.913392	0.84989	0.861193	0.931958	0.969096	0.871235	0.863059	0.827772	0.992996	0.986048	0.836552	0.988637	0.980566	0.957127	0.945651	0.990774	0.996404	0.98952	0.970595	0.909043	0.82237	0.947244	0.935741	0.83093	0.99744	0.949446	0.825595	0.984784	0.874561	0.999762	0.904964	0.978756	1	0.820084	0.899765	0.984945	0.967827	0.99892	0.900561	0.959475	0.944576	0.889297	0.9966	0.979322	0.985627	0.988766	0.938604
0.970596	NE		0.935635	0.852793	0.860915	0.935243	0.953988	0.869028	0.864108	0.831283	0.988575	0.982598	0.837824	0.997967	0.97838	0.944624	0.921572	0.99409	0.972446	0.996924	0.948491	0.900065	0.816096	0.952816	0.941228	0.82941	0.988089	0.947437	0.829618	0.990055	0.881477	1	0.925221	0.983746	0.998909	0.831575	0.895533	0.994697	0.974735	1	0.910864	0.971384	0.960884	0.928486	0.995585	0.978175	0.993696	0.984727	0.939601
0.990465	NE		0.953693	0.855521	0.878795	0.943407	0.93474	0.865184	0.866132	0.830866	0.983611	0.996472	0.854914	0.994342	0.966623	0.94716	0.893366	1	0.93633	0.995149	0.96531	0.910275	0.818267	0.967705	0.949931	0.828433	0.975656	0.949276	0.834932	0.980111	0.870955	0.988829	0.94636	0.997893	0.994398	0.856567	0.864545	0.980278	0.982147	0.990349	0.931438	0.973566	0.950165	0.937414	1	0.963645	0.994706	0.978323	0.955491
0.984899	NE		0.962252	0.872299	0.900838	0.964579	0.910094	0.861801	0.875808	0.845219	0.983549	0.993842	0.879189	0.997825	0.933703	0.942979	0.882081	0.996605	0.909664	0.984132	0.965595	0.914787	0.826016	0.965979	0.955923	0.827704	0.969059	0.954493	0.840656	0.968234	0.872891	0.982763	0.953988	0.999676	0.985008	0.887412	0.8374	0.958597	0.980892	0.968741	0.951281	0.984346	0.954373	0.967581	0.996679	0.953825	1	0.968642	0.959032
0.98792	NE		0.953884	0.889373	0.912525	0.973392	0.881658	0.861696	0.883518	0.860129	0.969058	0.996845	0.892876	1	0.902921	0.941578	0.894052	0.979034	0.88679	0.991208	0.965323	0.935018	0.826679	0.975445	0.954835	0.831574	0.959882	0.948305	0.84681	0.931899	0.86589	0.980827	0.978444	0.98978	0.966734	0.910884	0.831428	0.947039	0.991533	0.946825	0.951278	0.989408	0.940366	0.981557	0.995679	0.934553	0.991195	0.939403	0.961905
0.976978	NE		0.949283	0.910929	0.932902	0.979788	0.856402	0.865897	0.891562	0.875286	0.988364	0.982194	0.924578	0.992519	0.855079	0.937925	0.896335	0.959921	0.856523	1	0.969478	0.953869	0.831177	0.992311	0.948598	0.83763	0.946608	0.966095	0.848969	0.89185	0.884185	0.983465	0.982282	0.998484	0.955038	0.931356	0.834288	0.941914	1	0.924907	0.964749	0.959199	0.928528	0.992068	0.991092	0.905125	0.966305	0.888416	0.957358
0.978749	NE		0.953987	0.927866	0.953524	0.989575	0.831657	0.872829	0.896151	0.909028	0.992372	0.96415	0.958692	0.995834	0.785434	0.888845	0.898488	0.90524	0.811767	0.991576	0.978624	0.970305	0.842372	1	0.942603	0.849515	0.947278	0.96785	0.848533	0.850691	0.887517	0.988186	0.985753	1	0.938755	0.959777	0.825564	0.904375	0.995175	0.904425	0.961878	0.94494	0.920294	0.989667	0.99248	0.863	0.963565	0.838551	0.962664
0.951048	NE		0.97552	0.946097	0.982808	0.999296	0.783354	0.872632	0.906351	0.944577	1	0.950762	0.984841	0.985441	0.668399	0.814502	0.863424	0.845618	0.74845	0.983237	0.987348	0.982892	0.847399	0.995152	0.924092	0.868013	0.95522	0.961957	0.852797	0.771151	0.907907	0.98547	0.987728	0.986866	0.927666	0.972003	0.833184	0.891228	0.978664	0.889848	0.955959	0.929598	0.935792	0.98112	0.984855	0.80685	0.949357	0.807776	0.967133
0.985859	NE		0.988861	0.95594	1	1	0.73086	0.876998	0.910485	0.972922	0.996817	0.939145	1	0.985345	0.510782	0.718971	0.801551	0.763303	0.637399	0.985529	0.987426	0.983995	0.865665	0.994236	0.897818	0.882453	0.965313	0.974177	0.861976	0.672685	0.923212	0.979111	1	0.975251	0.927917	0.975071	0.826348	0.891691	0.973234	0.871233	0.947677	0.912931	0.947176	0.976818	0.983212	0.713965	0.958107	0.801765	0.959878
0.971615	NE		1	0.975869	0.993234	0.999453	0.664736	0.870627	0.925194	0.97478	0.994988	0.92862	0.995316	0.977717	0.300584	0.656032	0.721379	0.621365	0.465424	0.989086	0.992455	0.983497	0.882472	0.995894	0.856496	0.895685	0.966679	0.975434	0.860009	0.522906	0.953306	0.970867	0.993031	0.984291	0.921181	0.981591	0.829802	0.876549	0.951126	0.831928	0.937618	0.893809	0.947617	0.98179	0.969688	0.58531	0.945557	0.788946	0.953781
0.962024	NE		0.99708	0.985939	0.987055	0.989282	0.570744	0.880521	0.955654	0.984548	0.987829	0.901464	0.983816	0.967328	0.112652	0.628553	0.591958	0.409481	0.250585	0.967413	1	0.965291	0.875777	0.978741	0.796766	0.892936	0.958342	0.980656	0.87349	0.337231	0.97582	0.9576	0.980354	0.969012	0.900203	0.992059	0.824644	0.844312	0.943541	0.820915	0.92548	0.879113	0.94128	0.963327	0.959288	0.426576	0.945587	0.759863	0.945248
0.922317	NE		0.990838	0.988965	0.970531	0.976456	0.433632	0.878798	0.964993	0.998361	0.96873	0.855599	0.975489	0.968987	0	0.6271	0.403386	0.17952	0.0614863	0.945703	0.989645	0.984083	0.872549	0.955983	0.697784	0.909808	0.946761	0.983245	0.879489	0.161641	0.987038	0.943984	0.974047	0.976604	0.881611	1	0.820601	0.781674	0.939646	0.814946	0.900393	0.839186	0.935178	0.967222	0.944473	0.222672	0.944456	0.691115	0.963716
0.965846	NE		0.978891	0.990832	0.965644	0.964296	0.268348	0.91264	0.977158	0.993261	0.943365	0.763876	0.955647	0.942655		0.60581	0.179201			0.93413	0.968132	0.992386	0.875483	0.931293	0.557757	0.921079	0.937958	0.980909	0.885087	0.0497803	1	0.915245	0.982452	0.981288	0.850359	0.990855	0.812156	0.658512	0.934821	0.827336	0.895485	0.771747	0.931416	0.972657	0.931485	0.0649513	0.94377	0.578906	0.979788
0.939428	NE		0.979363	0.988984	0.959228	0.941816	0.128813	0.948873	0.981769	0.961842	0.900259	0.599335	0.965728	0.923181		0.564547	0			0.928951	0.954539	0.991011	0.892016	0.880635	0.367173	0.946491	0.934879	0.971906	0.895851	0	0.994176	0.877611	0.967978	0.983123	0.824665	0.991598	0.796434	0.468528	0.946402	0.829381	0.9089	0.64795	0.929802	0.963005	0.906485	0	0.940797	0.406995	0.987692
0.950523	NE		0.963659	0.993781	0.957673	0.919775	0.0435142	0.965048	0.979041	0.951689	0.858906	0.376747	0.965869	0.91479		0.436217				0.910766	0.944851	1	0.933885	0.830035	0.183766	0.963791	0.920921	0.960153	0.91586		0.999485	0.819448	0.960091	0.970535	0.774997	0.978563	0.792335	0.222939	0.955108	0.79748	0.915719	0.456946	0.919968	0.954635	0.87372		0.93974	0.223765	0.99399
0.992448	NE		0.952621	1	0.956975	0.889068	0	0.965328	0.97493	0.965468	0.786181	0.1652	0.952178	0.898435		0.236531				0.891074	0.920056	0.985192	0.966182	0.788393	0.0724353	0.966246	0.897542	0.945913	0.925537		0.990869	0.758706	0.971911	0.94962	0.708986	0.970201	0.799834	0.0329627	0.938063	0.703788	0.948245	0.23073	0.904926	0.929509	0.849812		0.930152	0.0914716	1
0.979956	NE		0.932121	0.999879	0.944509	0.862991		0.981885	0.979635	0.979522	0.671805	0.0432522	0.918419	0.877413		0				0.853922	0.889307	0.969437	0.982073	0.694182		0.967914	0.880935	0.929309	0.939062		0.99477	0.668159	0.947565	0.931887	0.600306	0.962932	0.815602		0.916814	0.562634	0.943076	0.0696269	0.868381	0.919613	0.818702		0.922218	0.0246402	0.995493
0.939673	NE		0.905708	0.990963	0.944074	0.831004		0.986928	0.985822	0.996928	0.51068	0	0.87127	0.849128						0.785265	0.819941	0.96492	0.985477	0.557113		0.959537	0.83936	0.912814	0.955936		0.993843	0.54405	0.906399	0.92487	0.45429	0.973341	0.827168		0.884461	0.398223	0.936467	0	0.846537	0.92563	0.776574		0.926842		0.987585
0.989389	NE		0.873086	0.99383	0.944934	0.76359		0.97803	0.986501	1	0.299632		0.800276	0.80858						0.678739	0.72037	0.971651	0.993683	0.365451		0.953281	0.804047	0.892064	0.966287		0.990562	0.38228	0.895423	0.893234	0.265648	0.9693	0.86353		0.846402	0.241018	0.931621		0.834315	0.952059	0.681457		0.948712		0.963111
0.964988	NE		0.853444	0.993389	0.951884	0.655196		0.986333	0.987636	0.983279	0.111266		0.732544	0.729354						0.504866	0.562761	0.969627	1	0.159705		0.953374	0.760078	0.87744	0.967857		0.971651	0.201055	0.867619	0.845783	0.115858	0.971947	0.905422		0.785745	0.117575	0.920946		0.825221	0.970372	0.542992		0.96037		0.951195
0.925489	NE		0.819313	0.976545	0.950025	0.501088		0.99024	0.978207	0.984825	0		0.639064	0.597749						0.292221	0.362308	0.967412	0.998584	0		0.955304	0.688707	0.854645	0.977744		0.948931	0.0703888	0.83875	0.770606	0.0341972	0.949126	0.931217		0.71811	0.0448414	0.93264		0.766174	0.992584	0.384031		0.970394		0.929149
0.991756	NE		0.788134	0.962282	0.962955	0.3105		0.979139	0.97086	0.9769			0.509434	0.426213						0.123018	0.156171	0.951906	0.979625			0.95317	0.578658	0.822942	0.990183		0.960197		0.795509	0.6942	0.000631554	0.936122	0.967595		0.622949	0	0.945826		0.713536	0.99679	0.197284		0.950903		0.903788
0.986112	NE		0.743377	0.937388	0.960715	0.143217		0.975933	0.965075	0.971719			0.350286	0.236683						0.0343914	0.00946807	0.956437	0.980595			0.954465	0.431205	0.774515	1		0.948798		0.716133	0.58392		0.928228	0.991172		0.496306		0.962965		0.616678	0.983521	0.0682248		0.948444		0.848896
0.990663	NE		0.666304	0.910482	0.956378	0.0448533		0.971572	0.955186	0.970098			0.18729	0.0796001						0		0.958057	0.979507			0.944294	0.261418	0.690788	0.993721		0.953953		0.633093	0.413375		0.898889	0.977193		0.354439		0.962204		0.482836	0.966437	0.00936346		0.951374		0.78392
0.952571	NE		0.55639	0.870835	0.949209	0		0.95908	0.956947	0.963834			0.066903									0.968564	0.982311			0.94791	0.1213	0.547373	0.98955		0.972655		0.52307	0.220796		0.87687	1		0.216914		0.952475		0.292533	0.971764			0.930751		0.673817
0.961157	NE		0.40081	0.832986	0.939794			0.959526	0.949641	0.96928			0									0.965149	0.970291			0.959069	0.0331412	0.336967	0.969		0.954588		0.358444	0.0821852		0.848718	0.992984		0.101518		0.924193		0.117016	0.982067			0.921518		0.535566
0.968775	NE		0.250248	0.765121	0.93466			0.955228	0.951722	0.957144												0.95347	0.963337			0.954579		0.131907	0.960141		0.941778		0.186832	0		0.833343	0.976098		0.0344042		0.908001		0.00939233	0.991723			0.921875		0.381249
0.977524	NE		0.127241	0.669741	0.935115			0.961821	0.960282	0.952018												0.946297	0.939724			0.958162		0	0.949646		0.926838		0.0639666			0.814193	0.962538		0		0.869237			0.981141			0.906577		0.219596
0.936398	NE		0.06209	0.536325	0.935753			0.963125	0.958209	0.939934												0.940785	0.887378			0.962583			0.934999		0.89533		0			0.7907	0.944569				0.821134			0.967141			0.874334		0.0959347
0.929795	NE		0.0288618	0.378286	0.932496			0.972253	0.963403	0.927731												0.936498	0.813119			0.959472			0.915685		0.891386					0.740123	0.95181				0.79539			0.929842			0.849369		0.0289052
0.960622	NE		0.012648	0.215969	0.914513			0.977797	0.958179	0.926074												0.925404	0.734689			0.957959			0.905807		0.86892					0.709754	0.952971				0.759298			0.899696			0.806718		0
0.979641	NE			0.107737	0.904839			0.96958	0.94836	0.916833												0.895602	0.660411			0.962672			0.893632		0.861445					0.665841	0.956852				0.697019			0.84288			0.760341
0.972092	NE			0.0504944	0.883586			0.957713	0.944445	0.890692												0.876461	0.601716			0.967754			0.895313		0.845057					0.588911	0.953049				0.619085			0.767386			0.661307
0.992565	NE			0.0222633	0.85836			0.93727	0.928786	0.861369												0.865795	0.541759			0.981861			0.89379		0.822219					0.470496	0.961885				0.505811			0.681328			0.528024
0.979515	NE			0.00659236	0.801107			0.920636	0.90946	0.824992												0.835473	0.507617			0.983177			0.893628		0.817567					0.310596	0.961111				0.363551			0.567143			0.365761
0.974445	NE			0	0.708924			0.912228	0.895364	0.775685												0.812434	0.493538			0.987022			0.898684		0.793152					0.146704	0.950168				0.219471			0.407422			0.20261
0.981164	NE				0.582741			0.925167	0.873176	0.699633												0.773262	0.501762			0.999268			0.897079		0.748048					0.0470156	0.942253				0.0970075			0.193471			0.084955
0.960056	OE				0.389707			0.937674	0.843223	0.583046												0.71066	0.481871			0.987754			0.880933		0.715281					0.00264117	0.938781				0			0			0.0256706
0.810119	OE				0.197039			0.961642	0.794184	0.410483												0.590768	0.393128			0.985516			0.859635		0.696136						0.935035
0.905413	OE				0.0647076			0.950311	0.735535	0.198036												0.431528	0.229265			0.993799			0.840412		0.650514						0.944065
0.966258	OE				0			0.920194	0.684281	0.0113231												0.229556	0.0705459			0.990939			0.825583		0.582167						0.966462
0.840836	OE							0.90323	0.612388													0.0235107				0.988033			0.800299		0.482352						0.967712
0.955451	OE							0.880438	0.506187																	0.991472			0.784501		0.32208						0.935209
0.961119	OE							0.870271	0.370037																	1			0.794838		0.13138						0.926304
0.923244	OE							0.859988	0.212218																	0.995282			0.798133		0						0.909386
0.949418	OE							0.845958	0.0919246																	0.988401			0.803525								0.906383
0.902959	OE							0.817706	0.0277751																	0.976114			0.772508								0.900303
0.936806	OE							0.76749	0.00713446																	0.966641			0.729582								0.894363
0.933318	OE							0.701331	0.00503244																	0.953972			0.674488								0.884179
0.935836	OE							0.611155																		0.928968			0.592495								0.863958
0.93292	OE							0.476562																		0.898561			0.476772								0.831694
0.983229	OE							0.307319																		0.854781			0.327373								0.822054
0.971614	OE							0.134919																		0.810473			0.174083								0.819285
0.956036	OE							0.0394939																		0.749126			0.0631251								0.813784
0.981107	OE																									0.668259			0.0106636								0.813495
0.939587	OE																									0.544956											0.80231
0.962675	OE																									0.389713											0.803553
0.88506	OE																									0.212726											0.795288
0.93646	OE																									0.0783726											0.760968
0.870111	OE																									0											0.729557
0.940355	OE																																				0.685381
0.903354	OE																																				0.630458
0.961757	OE																																				0.552035
0.961567	OE																																				0.422597
0.955921	OE																																				0.253947
0.900779	OE																																				0.0999185
0.882473	OE																																				0
0.961609	OE
0.832804	OE
0.882822	OE
0.952665	OE
0.93714	OE
0.940243	OE
0.972059	OE
0.87186	OE
RNAse			Profile intensity
Intensity	Condition		Value 0	Value 1	Value 2	Value 3	Value 4	Value 5	Value 6	Value 7	Value 8	Value 9	Value 10	Value 11	Value 12	Value 13	Value 14	Value 15	Value 16	Value 17	Value 18	Value 19	Value 20	Value 21	Value 22	Value 23	Value 24	Value 25	Value 26	Value 27	Value 28	Value 29	Value 30	Value 31	Value 32	Value 33	Value 34	Value 35	Value 36	Value 37	Value 38	Value 39	Value 40	Value 41	Value 42	Value 43	Value 0	Value 1	Value 2
0.968437	NE		0	0.0253499	0.00434698	0.00203029	0.0334236	0.0491776	0.00565128	0	0.0611334	0.0272858	0	0.0469183	0.1126	0.002717	0	0	0.0468098	0	0.00876301	0.0425132	0.00102767	0	0	0.070739	0.0952338	0	0	0	0	0.0463145	0	0	0	0	0.106799	0	0	0.000415415	0	0	0.00151606	0.00808937	0	0	0	0.0129075	0
0.934164	NE		0.0153301	0.0708659	0.0530632	0.0660056	0.102258	0.183267	0.0768179	0.167586	0.193435	0.102763	0.0694851	0.174745	0.266386	0.0898976	0.0516399	0.0876812	0.143773	0.0583947	0.148014	0.17202	0.113987	0.0419046	0.115716	0.177058	0.230047	0.0879733	0.183534	0.0186072	0.045481	0.119661	0.0877324	0.146229	0.0516245	0.0695644	0.22693	0.160881	0.159178	0.0800744	0.0545696	0.0460475	0.0302599	0.0301944	0.0497966	0.0805724	0.0407706	0.119076	0.118179
0.949488	NE		0.0522173	0.150619	0.150321	0.17063	0.23401	0.326029	0.19505	0.339838	0.315993	0.208764	0.191483	0.291849	0.424115	0.208725	0.155247	0.231507	0.293024	0.171317	0.330125	0.318154	0.258815	0.133479	0.289203	0.272051	0.350412	0.190028	0.378832	0.0658936	0.125824	0.226398	0.225557	0.329466	0.144428	0.185925	0.367278	0.327587	0.319033	0.210378	0.164357	0.13319	0.0961227	0.0789434	0.144793	0.212494	0.114116	0.257461	0.245321
0.942896	NE		0.134555	0.245677	0.277716	0.282424	0.384618	0.441346	0.314399	0.480007	0.389073	0.322144	0.335346	0.389213	0.554555	0.321048	0.306844	0.392928	0.442129	0.320278	0.490628	0.431164	0.375717	0.278694	0.453442	0.339815	0.443489	0.2688	0.556075	0.154687	0.239975	0.323719	0.370156	0.501039	0.271538	0.319233	0.496861	0.450145	0.44802	0.348252	0.327685	0.268175	0.194929	0.175533	0.284601	0.366497	0.205758	0.386928	0.349279
0.926978	NE		0.280358	0.324073	0.398735	0.363877	0.521558	0.517333	0.417893	0.594181	0.4348	0.426065	0.476418	0.469394	0.628964	0.405244	0.473573	0.529509	0.567426	0.474476	0.590485	0.502335	0.440847	0.438113	0.571832	0.372928	0.521187	0.316798	0.669947	0.280953	0.364252	0.396665	0.477538	0.62572	0.386765	0.427094	0.600971	0.52765	0.543056	0.44056	0.490437	0.415912	0.307588	0.306237	0.432325	0.50757	0.27752	0.49129	0.420086
0.85687	NE		0.443784	0.381871	0.497697	0.416879	0.610099	0.567384	0.486344	0.702917	0.495308	0.512276	0.583469	0.542119	0.67699	0.466371	0.599281	0.62105	0.666117	0.601406	0.653577	0.549585	0.466236	0.570303	0.658827	0.372952	0.575441	0.346045	0.723956	0.40273	0.471925	0.450043	0.528496	0.730917	0.474118	0.516462	0.671327	0.584194	0.605328	0.510808	0.605678	0.556166	0.390047	0.432332	0.561383	0.611955	0.324199	0.591514	0.433861
0.941519	NE		0.577594	0.416668	0.554358	0.45998	0.665174	0.603238	0.528813	0.797298	0.579778	0.579156	0.661051	0.596741	0.708558	0.513597	0.678613	0.686883	0.752783	0.693296	0.700907	0.607139	0.485287	0.66563	0.736593	0.363826	0.627155	0.397348	0.744675	0.511268	0.560771	0.48103	0.539631	0.825026	0.547978	0.597999	0.718433	0.643982	0.647966	0.562446	0.670628	0.667092	0.445549	0.523725	0.648067	0.70418	0.366254	0.660119	0.397492
0.909281	NE		0.674196	0.43829	0.590245	0.487337	0.700544	0.637644	0.557396	0.854289	0.681456	0.624169	0.72122	0.641255	0.748632	0.561589	0.72174	0.716302	0.793815	0.745896	0.748195	0.667535	0.494901	0.733944	0.791775	0.369982	0.668628	0.455616	0.765919	0.599896	0.629234	0.52101	0.552786	0.885548	0.617006	0.67093	0.755222	0.72608	0.690485	0.59081	0.704305	0.738439	0.498561	0.588624	0.677193	0.761233	0.399719	0.720396	0.365042
0.903196	NE		0.751086	0.445358	0.631706	0.513866	0.714786	0.674303	0.570282	0.88906	0.790782	0.661619	0.756916	0.682616	0.789947	0.594465	0.759836	0.755582	0.845494	0.779357	0.798608	0.701607	0.500562	0.77552	0.830055	0.390097	0.710937	0.532203	0.789865	0.688649	0.700703	0.570248	0.584901	0.917189	0.687494	0.729066	0.796834	0.776267	0.727802	0.609734	0.698169	0.8025	0.562256	0.642588	0.692553	0.792418	0.432826	0.776365	0.373463
0.982386	NE		0.806968	0.448312	0.690554	0.536345	0.724124	0.71293	0.584926	0.905508	0.857597	0.686279	0.786281	0.715242	0.840374	0.622131	0.800703	0.785574	0.886301	0.79043	0.825794	0.715476	0.513498	0.805712	0.855273	0.422689	0.736501	0.605304	0.810553	0.750416	0.750677	0.64569	0.622947	0.928272	0.756796	0.76778	0.830229	0.78501	0.777503	0.639338	0.68411	0.852683	0.638271	0.689729	0.718657	0.79724	0.471859	0.832568	0.427504
0.990147	NE		0.846865	0.467935	0.750662	0.587956	0.736338	0.744381	0.634073	0.938391	0.909096	0.706147	0.800043	0.735906	0.889841	0.656845	0.851239	0.810851	0.89257	0.77986	0.831134	0.704879	0.533592	0.822753	0.853084	0.479802	0.778581	0.680795	0.824733	0.788328	0.776348	0.724488	0.653886	0.925867	0.806302	0.797234	0.859922	0.777538	0.830108	0.66671	0.669596	0.907796	0.706768	0.729498	0.756124	0.803322	0.516593	0.883445	0.523333
0.942019	NE		0.868917	0.499915	0.80172	0.642815	0.757942	0.774708	0.703568	0.976671	0.943609	0.741409	0.805133	0.764953	0.941797	0.680945	0.894445	0.829006	0.913572	0.762974	0.84408	0.699248	0.570485	0.852623	0.842045	0.539639	0.792995	0.735138	0.861953	0.806059	0.777531	0.807185	0.687808	0.929511	0.831313	0.83199	0.864949	0.776148	0.854895	0.687424	0.672519	0.943329	0.784449	0.756199	0.784674	0.796392	0.567079	0.907459	0.628048
0.945943	NE		0.865328	0.546458	0.841285	0.697849	0.76928	0.81534	0.762939	0.998348	0.963978	0.798309	0.809154	0.812141	0.971144	0.721006	0.922414	0.829772	0.924031	0.762016	0.864192	0.694614	0.643997	0.881042	0.855356	0.587009	0.804891	0.768115	0.916115	0.82958	0.774167	0.881882	0.722183	0.91622	0.837017	0.839527	0.868739	0.795366	0.88853	0.699199	0.659595	0.976488	0.838259	0.772211	0.790291	0.808217	0.621589	0.924896	0.69845
0.977554	NE		0.858255	0.598761	0.853937	0.745677	0.788751	0.839639	0.817919	0.999314	0.96942	0.85858	0.818619	0.842179	0.97697	0.791523	0.950248	0.835285	0.931602	0.779489	0.893471	0.713255	0.731615	0.89481	0.881073	0.622136	0.805966	0.789647	0.94138	0.847018	0.763385	0.951096	0.737705	0.888337	0.830112	0.84309	0.870234	0.827881	0.927232	0.69961	0.630983	0.991573	0.86341	0.780196	0.798858	0.815094	0.688686	0.926741	0.755802
0.957587	NE		0.859719	0.660193	0.854183	0.777409	0.822288	0.869931	0.842032	0.988292	0.981175	0.907243	0.825392	0.857844	0.949682	0.86102	0.963067	0.852377	0.930753	0.819213	0.916133	0.743736	0.808005	0.898234	0.907562	0.656248	0.815425	0.814033	0.956386	0.859901	0.75576	0.983873	0.749414	0.867262	0.830823	0.854046	0.873018	0.848656	0.947678	0.688532	0.607815	0.998912	0.877697	0.788378	0.805867	0.813259	0.746713	0.943625	0.78518
0.8194	NE		0.860375	0.729933	0.847171	0.807616	0.855581	0.894171	0.851678	0.987968	0.980941	0.919943	0.837302	0.855148	0.908436	0.903903	0.957484	0.870075	0.929616	0.853754	0.947024	0.787695	0.856338	0.903111	0.932675	0.709508	0.821751	0.819877	0.963843	0.873234	0.744681	1	0.734098	0.847126	0.83703	0.843559	0.899672	0.859978	0.957198	0.689355	0.614086	0.999595	0.888235	0.817254	0.805104	0.834793	0.795536	0.941522	0.81303
0.974606	NE		0.850145	0.785882	0.838627	0.821614	0.893803	0.939768	0.861535	0.999008	0.972311	0.932898	0.833726	0.855754	0.871165	0.918599	0.936233	0.911171	0.926057	0.873736	0.98044	0.802898	0.884599	0.902993	0.937242	0.779238	0.84067	0.833837	0.955821	0.880519	0.747832	0.989869	0.723297	0.833077	0.836856	0.83461	0.912256	0.844665	0.969844	0.714369	0.654819	1	0.906555	0.856115	0.818453	0.881393	0.837896	0.943898	0.845593
0.958361	NE		0.858737	0.833671	0.824187	0.834409	0.925983	0.964332	0.875115	1	0.989634	0.947058	0.82107	0.863618	0.826478	0.910144	0.910518	0.929431	0.929904	0.871351	0.997689	0.803558	0.895952	0.916176	0.897564	0.844192	0.850034	0.85204	0.952544	0.868934	0.740536	0.984189	0.699779	0.83269	0.827598	0.850098	0.919081	0.82626	0.988471	0.766804	0.698949	0.991917	0.927876	0.884699	0.827498	0.909988	0.864445	0.949355	0.858144
0.865644	NE		0.881588	0.86005	0.830974	0.855056	0.938376	0.987014	0.894721	0.984011	0.997676	0.964198	0.793103	0.86257	0.7946	0.909844	0.896435	0.966296	0.934049	0.8411	1	0.791798	0.903214	0.917229	0.811471	0.896313	0.845068	0.863961	0.978043	0.860656	0.732159	0.96595	0.684323	0.848384	0.818498	0.858804	0.919898	0.794458	1	0.80556	0.747829	0.976173	0.946086	0.909554	0.813714	0.925094	0.879032	0.967222	0.866018
0.89557	NE		0.905617	0.878845	0.842265	0.876923	0.9307	0.999881	0.905722	0.927589	0.991818	0.966196	0.769612	0.844022	0.756777	0.92838	0.868822	0.997962	0.932004	0.814748	0.959938	0.78918	0.891806	0.929411	0.719401	0.929367	0.827009	0.876513	1	0.863345	0.712162	0.944613	0.685783	0.868435	0.819226	0.892384	0.888211	0.7879	0.9841	0.81494	0.794444	0.949371	0.933192	0.91195	0.778694	0.938307	0.900924	0.988514	0.88675
0.943135	NE		0.925041	0.906839	0.842385	0.896063	0.908539	0.999509	0.920321	0.854069	1	0.969033	0.751842	0.795942	0.725775	0.928715	0.849158	1	0.931115	0.792943	0.931887	0.790861	0.896495	0.943156	0.655403	0.948486	0.816025	0.897462	0.992153	0.865595	0.670923	0.921642	0.692858	0.898399	0.832094	0.923976	0.849416	0.79726	0.97532	0.796488	0.841816	0.925106	0.898137	0.905622	0.731478	0.949761	0.907413	0.994404	0.878945
0.907635	NE		0.946583	0.948857	0.839944	0.917671	0.879708	1	0.918051	0.764504	0.997727	0.966709	0.750752	0.738538	0.721574	0.919199	0.831654	0.980601	0.902234	0.781359	0.920969	0.779085	0.888186	0.963786	0.633187	0.971402	0.808298	0.893913	0.971694	0.84593	0.608638	0.903612	0.686762	0.921734	0.849213	0.954263	0.806742	0.819448	0.948815	0.757777	0.90554	0.912362	0.861401	0.90321	0.698405	0.976736	0.916317	0.995876	0.858474
0.964276	NE		0.960762	0.985467	0.844174	0.940745	0.845448	0.969383	0.912231	0.686158	0.973944	0.970686	0.756127	0.688851	0.72035	0.919663	0.798848	0.925996	0.867406	0.76731	0.920089	0.76843	0.866618	0.961719	0.631008	0.981879	0.77131	0.903396	0.945388	0.821609	0.556501	0.893981	0.658849	0.958775	0.843537	0.95714	0.768271	0.832349	0.942646	0.713269	0.963687	0.917312	0.830239	0.915946	0.676098	0.98296	0.920114	0.997393	0.809093
0.970787	NE		0.965461	1	0.856338	0.956299	0.815109	0.922429	0.898828	0.61364	0.943387	0.968736	0.767212	0.62656	0.72282	0.906107	0.729613	0.87195	0.855354	0.771075	0.924157	0.757596	0.821944	0.97146	0.63102	0.988004	0.691354	0.929688	0.895451	0.815629	0.518197	0.890883	0.629914	0.961032	0.822223	0.926466	0.734393	0.861176	0.945972	0.676268	0.994514	0.928804	0.824987	0.917247	0.6458	0.992561	0.941458	1	0.730305
0.958774	NE		0.975808	0.97039	0.871617	0.96439	0.772705	0.880001	0.89912	0.556852	0.923557	0.979019	0.777754	0.577002	0.727077	0.884951	0.660437	0.830425	0.838352	0.794831	0.921981	0.727437	0.762472	0.984095	0.628417	0.989554	0.613249	0.948464	0.846215	0.821439	0.50452	0.897804	0.616927	0.905251	0.814032	0.893801	0.712182	0.907902	0.956672	0.655431	1	0.928743	0.835898	0.905781	0.607814	0.99503	0.962692	0.999595	0.652297
0.889133	NE		0.982204	0.910995	0.901025	0.967512	0.735535	0.846795	0.915551	0.523954	0.895586	0.968469	0.809454	0.540873	0.743605	0.828239	0.602664	0.772089	0.835187	0.838016	0.891738	0.686594	0.721037	1	0.623612	0.984972	0.551636	0.969372	0.770451	0.826627	0.503636	0.910046	0.602399	0.821951	0.806383	0.865282	0.699638	0.955046	0.952529	0.626569	0.96332	0.922152	0.84663	0.889004	0.559309	0.988268	0.978995	0.992667	0.593108
0.945311	NE		0.967557	0.837095	0.923915	0.95351	0.690941	0.809343	0.930274	0.500665	0.893323	0.943935	0.833897	0.526639	0.746897	0.759251	0.569765	0.704922	0.825974	0.878119	0.861686	0.650917	0.684864	0.989525	0.625505	0.950244	0.513593	0.991699	0.692518	0.808474	0.500145	0.891036	0.591173	0.744279	0.811666	0.836701	0.687611	0.987172	0.930185	0.594722	0.888181	0.895917	0.828042	0.883048	0.528005	1	0.986732	0.980164	0.575982
0.950235	NE		0.95871	0.763315	0.933355	0.90059	0.655112	0.754937	0.953382	0.487913	0.907066	0.911884	0.868592	0.52857	0.763314	0.707649	0.557927	0.621785	0.81316	0.918394	0.822732	0.631418	0.651582	0.956047	0.632287	0.901582	0.499319	1	0.621084	0.807741	0.502443	0.845911	0.577565	0.677282	0.804115	0.815171	0.670504	0.998224	0.879304	0.545974	0.796006	0.864875	0.802566	0.876624	0.506398	0.988829	1	0.967459	0.558658
0.975461	NE		0.947737	0.698298	0.933022	0.809696	0.634246	0.696808	0.95947	0.492323	0.950155	0.858602	0.889985	0.528406	0.771109	0.649382	0.565995	0.567906	0.78329	0.953742	0.745769	0.614484	0.628177	0.888856	0.625436	0.851329	0.495451	0.992748	0.56859	0.81895	0.507028	0.77895	0.566645	0.627855	0.816412	0.792919	0.674303	0.947506	0.817959	0.511566	0.710976	0.809428	0.758333	0.887824	0.495276	0.978094	0.997801	0.968907	0.54684
0.927664	NE		0.953902	0.65421	0.908546	0.711116	0.616495	0.633833	0.941608	0.519922	0.971096	0.770472	0.886725	0.548571	0.78227	0.609613	0.567646	0.549428	0.763905	0.963879	0.684519	0.601189	0.625013	0.817168	0.627458	0.782479	0.502973	0.984039	0.532405	0.872398	0.512038	0.689198	0.571926	0.600726	0.826489	0.754588	0.714833	0.835674	0.742468	0.494359	0.634314	0.752806	0.72688	0.903298	0.495193	0.952454	0.990663	0.961605	0.535707
0.965544	NE		0.98819	0.61845	0.864967	0.643909	0.603304	0.565612	0.896861	0.543885	0.960654	0.684089	0.855947	0.555803	0.798846	0.580887	0.56098	0.550979	0.727098	0.967152	0.650077	0.592832	0.616586	0.764218	0.626247	0.709933	0.50354	0.980338	0.515944	0.935211	0.519579	0.600385	0.575311	0.571293	0.84309	0.716476	0.784236	0.715472	0.671075	0.488935	0.583198	0.690176	0.69943	0.906978	0.494766	0.922385	0.978682	0.960444	0.532993
0.936329	NE		0.988799	0.597064	0.809158	0.613462	0.586391	0.51303	0.832519	0.575469	0.939362	0.622833	0.812636	0.568739	0.824866	0.563116	0.543995	0.556524	0.712629	0.962455	0.641151	0.584422	0.599517	0.723976	0.630577	0.645201	0.51594	0.985498	0.526042	0.981561	0.524297	0.540488	0.577497	0.541387	0.84632	0.664777	0.858612	0.607362	0.605877	0.492791	0.55221	0.629955	0.676577	0.906236	0.489736	0.900584	0.966896	0.939322	0.531893
0.877443	NE		0.957523	0.582414	0.731847	0.600007	0.568578	0.479709	0.769354	0.603275	0.897912	0.588133	0.772473	0.575524	0.835113	0.552004	0.528498	0.553396	0.687004	0.958202	0.63206	0.559177	0.578213	0.694753	0.644273	0.602656	0.52183	0.999243	0.556167	0.998571	0.536874	0.507921	0.580093	0.53116	0.862375	0.630454	0.921216	0.531124	0.568258	0.501805	0.537775	0.592623	0.673865	0.896465	0.491193	0.903446	0.968717	0.921144	0.532008
0.933088	NE		0.90095	0.571421	0.656464	0.589978	0.555154	0.467855	0.707799	0.604977	0.847502	0.570545	0.744665	0.580535	0.829727	0.539988	0.529656	0.555122	0.667494	0.950588	0.61913	0.539337	0.559347	0.667117	0.68048	0.582738	0.536343	0.977065	0.583362	0.982567	0.550841	0.492112	0.583269	0.539585	0.87198	0.618277	0.96623	0.48994	0.536326	0.502024	0.534566	0.58529	0.671323	0.852201	0.500597	0.911742	0.986123	0.909623	0.521292
0.940072	NE		0.835633	0.566564	0.609396	0.584994	0.544616	0.469179	0.6677	0.596535	0.790358	0.561771	0.725699	0.576231	0.810375	0.52969	0.532568	0.536847	0.646646	0.948796	0.603795	0.515954	0.543819	0.638232	0.748814	0.574165	0.542762	0.938904	0.599189	0.930425	0.571933	0.491363	0.587568	0.555593	0.873879	0.604475	0.966327	0.479234	0.523277	0.493093	0.525394	0.593149	0.671364	0.776213	0.504364	0.934447	0.984341	0.922776	0.509454
0.975606	NE		0.778663	0.560114	0.581115	0.586657	0.534262	0.484729	0.651942	0.589555	0.706189	0.557547	0.703083	0.579728	0.785743	0.517131	0.542286	0.517752	0.625365	0.916175	0.591115	0.490451	0.543859	0.642063	0.843002	0.589042	0.55964	0.901277	0.606326	0.847331	0.613816	0.516381	0.595503	0.573613	0.87795	0.62214	0.901626	0.46249	0.513515	0.501634	0.516601	0.603203	0.660418	0.68805	0.505273	0.950485	0.96659	0.923392	0.501429
0.944806	NE		0.769411	0.552318	0.56303	0.581294	0.521416	0.501007	0.649931	0.585259	0.618262	0.562855	0.680088	0.601757	0.767871	0.49934	0.546875	0.513439	0.618688	0.862851	0.573826	0.468983	0.547076	0.656964	0.917484	0.593348	0.565716	0.863241	0.62187	0.755937	0.668249	0.549879	0.61481	0.592254	0.881776	0.646106	0.798766	0.46165	0.509927	0.502098	0.506109	0.604692	0.661024	0.626272	0.518053	0.967653	0.941802	0.926924	0.49295
0.900408	NE		0.786783	0.555392	0.557509	0.568044	0.521002	0.515155	0.646924	0.600183	0.556117	0.563688	0.660764	0.648859	0.760029	0.489965	0.545332	0.501667	0.613765	0.779138	0.544354	0.46276	0.564639	0.662693	0.952038	0.60254	0.573961	0.812668	0.635864	0.694142	0.746132	0.577257	0.648846	0.599496	0.84997	0.678382	0.703068	0.465191	0.49692	0.497613	0.496677	0.61083	0.659029	0.582681	0.534864	0.967516	0.906492	0.918639	0.482445
0.901621	NE		0.790078	0.559586	0.552219	0.563402	0.527185	0.530764	0.64333	0.62528	0.520513	0.558208	0.635199	0.713792	0.742149	0.48766	0.552964	0.494738	0.595156	0.687629	0.513815	0.456678	0.600607	0.671847	0.973986	0.619555	0.579947	0.752301	0.640242	0.666349	0.826937	0.600042	0.713725	0.620214	0.781355	0.713711	0.629239	0.461684	0.483932	0.504865	0.498044	0.619664	0.662997	0.553396	0.574376	0.936703	0.848827	0.93083	0.477611
0.901197	NE		0.793263	0.561617	0.545734	0.551414	0.548085	0.545398	0.644956	0.654839	0.4982	0.554321	0.609846	0.798563	0.725078	0.500601	0.58504	0.487874	0.591623	0.596277	0.480377	0.459235	0.646898	0.683167	0.987868	0.637112	0.58713	0.696794	0.654566	0.654536	0.894713	0.617884	0.768875	0.641681	0.699931	0.736793	0.570016	0.450768	0.467231	0.502265	0.501827	0.631202	0.664688	0.532402	0.629723	0.881262	0.793257	0.937818	0.49472
0.974515	NE		0.777374	0.566434	0.537813	0.542562	0.592688	0.552027	0.643466	0.69063	0.495957	0.548158	0.588264	0.885943	0.709145	0.529885	0.639897	0.497184	0.590134	0.52812	0.469696	0.467125	0.716667	0.698157	1	0.641519	0.599145	0.656582	0.676649	0.639053	0.927997	0.633869	0.785009	0.658069	0.61453	0.737816	0.522423	0.45063	0.447735	0.508135	0.512639	0.663878	0.665207	0.524573	0.694505	0.798389	0.734627	0.95019	0.535228
0.939571	NE		0.769974	0.574617	0.532127	0.537422	0.652825	0.568767	0.635185	0.748618	0.486566	0.542976	0.560215	0.952942	0.678023	0.575816	0.720212	0.506571	0.621367	0.483284	0.470894	0.482901	0.765913	0.701751	0.982944	0.650108	0.641451	0.636466	0.712142	0.629067	0.959546	0.64521	0.794311	0.669654	0.548785	0.739745	0.501583	0.449424	0.431077	0.523384	0.550789	0.693206	0.675399	0.516002	0.755905	0.728474	0.671648	0.939941	0.594765
0.933996	NE		0.762985	0.589318	0.528142	0.54401	0.736604	0.585489	0.641434	0.794834	0.482659	0.5505	0.528279	0.98718	0.644681	0.644283	0.804578	0.532017	0.652309	0.461946	0.469823	0.51391	0.798276	0.706899	0.958017	0.655017	0.695444	0.60634	0.743113	0.611691	0.976627	0.66406	0.82193	0.686161	0.514632	0.709754	0.502565	0.443493	0.433677	0.552952	0.615028	0.719725	0.705516	0.532235	0.810374	0.671433	0.62378	0.881492	0.667161
0.868715	NE		0.761326	0.607942	0.525497	0.54954	0.824727	0.626269	0.638091	0.833353	0.491209	0.570072	0.495994	1	0.620764	0.725925	0.879477	0.566239	0.673976	0.456338	0.477973	0.548218	0.830405	0.71871	0.948259	0.660355	0.738727	0.592521	0.769892	0.596816	0.984106	0.686828	0.853479	0.72095	0.502185	0.706477	0.510195	0.449714	0.457907	0.598483	0.696011	0.741701	0.757531	0.560571	0.847823	0.635598	0.588875	0.791361	0.749939
0.92745	OE		0.759381	0.654325	0.515318	0.579738	0.915948	0.662995	0.634993	0.855962	0.501129	0.598637	0.493868	0.995949	0.601559	0.799611	0.927054	0.63041	0.710225	0.465026	0.501477	0.594661	0.8528	0.736703	0.946742	0.658817	0.761747	0.580194	0.803801	0.577579	0.997383	0.728274	0.884938	0.777081	0.497378	0.717306	0.521679	0.452949	0.499208	0.670107	0.777375	0.758324	0.808648	0.594743	0.917364	0.616161	0.563616	0.730259	0.84979
0.849154	OE		0.750878	0.714558	0.50083	0.628272	0.978868	0.70087	0.656195	0.890528	0.502301	0.636858	0.498014	0.987343	0.597905	0.853231	0.943591	0.701955	0.762311	0.477621	0.543898	0.660528	0.880454	0.771361	0.948976	0.651424	0.797647	0.580741	0.846188	0.55741	1	0.796282	0.905998	0.836887	0.490211	0.755789	0.540604	0.466258	0.563644	0.755913	0.848792	0.784522	0.848171	0.605293	0.970272	0.603955	0.539846	0.687743	0.925671
0.84339	OE		0.737411	0.782385	0.502583	0.678206	1	0.742299	0.678809	0.91226	0.508704	0.689723	0.513411	0.986928	0.600367	0.883119	0.935735	0.780271	0.81424	0.487445	0.571135	0.733136	0.890151	0.795738	0.972241	0.650367	0.827574	0.573258	0.881729	0.535426	0.995449	0.863708	0.941506	0.879995	0.478901	0.809712	0.555597	0.476295	0.642982	0.841209	0.881292	0.821539	0.862343	0.619181	0.990354	0.590344	0.538191	0.674758	0.978155
0.887347	OE		0.714102	0.830017	0.503714	0.720292	0.992933	0.79615	0.718351	0.910951	0.516104	0.758086	0.528557	0.971431	0.612828	0.917712	0.920435	0.842309	0.860533	0.498234	0.631776	0.814446	0.890831	0.831968	0.984729	0.680901	0.855347	0.557424	0.895361	0.516689	0.98352	0.906951	0.961695	0.917641	0.47933	0.869677	0.576486	0.505528	0.733928	0.91352	0.878572	0.861413	0.874268	0.636094	1	0.579402	0.537574	0.657413	1
0.897267	OE		0.684995	0.869664	0.539543	0.774309	0.976773	0.85078	0.770496	0.897437	0.51887	0.840289	0.540893	0.956459	0.632998	0.929507	0.914953	0.865474	0.890186	0.52249	0.699017	0.877637	0.904199	0.862254	0.99097	0.747199	0.886128	0.536084	0.920745	0.496661	0.952247	0.909439	0.989309	0.951605	0.471723	0.909687	0.583032	0.539547	0.8174	0.964106	0.864369	0.88607	0.891415	0.650679	0.982634	0.565883	0.532691	0.644624	0.994392
0.950658	OE		0.676465	0.895713	0.600423	0.830488	0.981321	0.871914	0.814915	0.895881	0.51625	0.918996	0.556328	0.935374	0.651008	0.937681	0.9326	0.871879	0.917639	0.537433	0.786618	0.91263	0.922956	0.869999	0.980124	0.815854	0.931107	0.521782	0.930762	0.485091	0.924168	0.906979	0.994753	0.98264	0.470146	0.938615	0.591531	0.597731	0.883336	1	0.855911	0.909752	0.926176	0.670787	0.952242	0.544156	0.530812	0.639419	0.979063
0.903014	OE		0.698384	0.912567	0.69468	0.889542	0.995686	0.873606	0.856132	0.90353	0.528395	0.967511	0.58001	0.898391	0.663894	0.937684	0.958922	0.854514	0.958816	0.541449	0.859454	0.909318	0.942888	0.880994	0.974259	0.861644	0.965169	0.508362	0.951642	0.491432	0.913517	0.920512	1	1	0.462882	0.952383	0.594129	0.665176	0.938916	0.99908	0.854214	0.911849	0.966004	0.690967	0.938288	0.519522	0.526898	0.632482	0.958656
0.981145	OE		0.738724	0.916084	0.8046	0.943158	0.988136	0.862803	0.906653	0.911049	0.54524	0.98862	0.642559	0.85821	0.671374	0.939476	0.982379	0.805796	0.986848	0.543311	0.891931	0.896678	0.959432	0.886479	0.951481	0.886127	0.992035	0.492453	0.97954	0.501926	0.899904	0.943329	0.990538	0.985538	0.456853	0.95302	0.603366	0.710706	0.97221	0.972587	0.879612	0.9117	0.993165	0.725477	0.935087	0.499033	0.518455	0.623717	0.932317
0.957446	OE		0.786089	0.919349	0.908921	0.9799	0.975821	0.865309	0.955477	0.936836	0.575319	1	0.720647	0.827183	0.701243	0.958423	1	0.770738	1	0.548568	0.904662	0.880538	0.981638	0.883151	0.918411	0.917619	1	0.469578	0.993814	0.528025	0.885362	0.951812	0.976334	0.962705	0.458336	0.975144	0.609433	0.769927	0.984716	0.950586	0.905373	0.905056	1	0.780995	0.93587	0.480493	0.516407	0.608302	0.93185
0.95954	OE		0.838743	0.924692	0.968607	1	0.939486	0.877526	0.99851	0.945337	0.626181	0.999507	0.829652	0.814965	0.75104	0.970423	0.993818	0.751748	0.980364	0.551016	0.890673	0.875067	1	0.908861	0.856148	0.934437	0.975307	0.460118	0.979509	0.589901	0.857788	0.938339	0.953202	0.945838	0.46584	0.984535	0.615152	0.809915	0.971679	0.925076	0.926421	0.892687	0.995822	0.851877	0.920746	0.450973	0.511171	0.595178	0.938508
0.777436	OE		0.867631	0.933283	0.977033	0.999904	0.913505	0.89049	1	0.956253	0.7097	0.995869	0.900816	0.804975	0.826818	0.990374	0.975771	0.751421	0.982087	0.547122	0.864046	0.872001	0.997458	0.928335	0.802183	0.972229	0.961671	0.459085	0.953385	0.676167	0.830888	0.923242	0.911859	0.928268	0.482348	0.990158	0.645468	0.871454	0.937802	0.907885	0.942516	0.891263	0.981607	0.930769	0.913953	0.425708	0.516018	0.576319	0.93206
0.854448	OE		0.871507	0.938864	0.969167	0.978261	0.888515	0.892178	0.993693	0.940845	0.805466	0.991995	0.932652	0.794453	0.891304	1	0.936707	0.745907	0.985387	0.550299	0.853781	0.873159	0.993116	0.918803	0.722662	0.99428	0.967524	0.481076	0.92125	0.794676	0.786856	0.907993	0.868023	0.921635	0.499296	0.999202	0.693611	0.936912	0.919938	0.892329	0.931987	0.909756	0.967923	0.981204	0.923638	0.416875	0.52373	0.548611	0.910022
0.736465	OE		0.876811	0.953664	0.964461	0.951559	0.892383	0.894721	0.979487	0.923464	0.878579	0.982035	0.957681	0.783935	0.928574	0.998223	0.900143	0.728688	0.985709	0.547929	0.873988	0.884868	0.974888	0.91251	0.643303	1	0.973216	0.519595	0.903495	0.907429	0.71864	0.89735	0.817066	0.887203	0.530364	1	0.750729	0.984575	0.908697	0.875326	0.916934	0.924728	0.962902	0.99527	0.943416	0.434678	0.53389	0.526961	0.90151
0.916969	OE		0.889608	0.953209	0.969668	0.933783	0.911182	0.889997	0.972976	0.926938	0.909124	0.981091	0.972506	0.768829	0.92795	0.98596	0.869831	0.692763	0.968844	0.564737	0.890258	0.899687	0.963393	0.915308	0.527738	0.994456	0.96668	0.595349	0.883626	0.972416	0.616065	0.884862	0.741434	0.841128	0.58346	0.984348	0.807056	1	0.918597	0.877866	0.882384	0.908424	0.961802	1	0.96526	0.459911	0.551107	0.505286	0.918625
0.911674	OE		0.894361	0.947189	0.976612	0.925744	0.935382	0.88184	0.958003	0.912206	0.928873	0.981405	0.997697	0.739816	0.9237	0.972338	0.829821	0.627153	0.94461	0.598194	0.900381	0.926209	0.94187	0.926319	0.370504	0.991464	0.935443	0.678886	0.884663	1	0.474002	0.865437	0.639425	0.781235	0.650198	0.952874	0.852189	0.996042	0.9272	0.873791	0.845136	0.884283	0.973027	0.994343	0.975118	0.493257	0.560024	0.482405	0.944854
0.894106	OE		0.918007	0.915361	0.993685	0.915588	0.959553	0.866903	0.947928	0.880806	0.941692	0.977045	0.991978	0.675295	0.925893	0.956911	0.768777	0.540455	0.901697	0.63949	0.888418	0.953035	0.897655	0.926026	0.196546	0.961807	0.887587	0.763845	0.864249	0.999102	0.321919	0.830904	0.519721	0.707784	0.730412	0.894619	0.883896	0.981285	0.940317	0.881609	0.827845	0.850999	0.98064	0.979212	0.955066	0.539726	0.588308	0.489888	0.968563
0.926966	OE		0.942348	0.876327	1	0.916041	0.973952	0.843521	0.9459	0.826557	0.920452	0.967261	0.989403	0.583246	0.942619	0.917056	0.68373	0.416656	0.851966	0.701706	0.86384	0.9811	0.840472	0.91995	0.0618854	0.940871	0.829152	0.815752	0.821246	0.98385	0.175271	0.782321	0.377294	0.610399	0.809633	0.842766	0.907024	0.957972	0.948299	0.875853	0.807131	0.840597	0.993701	0.961851	0.924475	0.586931	0.640765	0.50528	0.946885
0.845967	OE		0.956457	0.841254	0.972318	0.922286	0.991712	0.796266	0.931399	0.763457	0.898524	0.971147	0.995303	0.461507	0.929095	0.883135	0.588092	0.271394	0.807661	0.763208	0.824727	0.997275	0.788957	0.902108		0.925884	0.778939	0.85018	0.744016	0.976009	0.0718375	0.730584	0.220393	0.519959	0.884103	0.756641	0.926656	0.948591	0.937652	0.848845	0.792733	0.832321	0.987502	0.954278	0.888908	0.6208	0.709184	0.516842	0.882199
0.95676	OE		0.970627	0.801648	0.924822	0.927597	0.990906	0.731205	0.931003	0.69159	0.909384	0.989544	0.989982	0.303342	0.912864	0.873184	0.486232	0.132779	0.775823	0.795297	0.764954	1	0.713503	0.854744		0.919168	0.74187	0.876917	0.625923	0.976608	0.0109614	0.64995	0.0863685	0.396706	0.932511	0.642671	0.944297	0.953943	0.913584	0.826457	0.775697	0.788069	0.972804	0.950586	0.851812	0.655447	0.796666	0.538983	0.830772
0.789188	OE		0.975026	0.763096	0.876707	0.911197	0.985586	0.62805	0.926963	0.58459	0.922499	0.994792	0.988762	0.136514	0.90252	0.853465	0.374894	0.029834	0.724123	0.816119	0.713408	0.990328	0.60528	0.808159		0.903781	0.695074	0.891686	0.495662	0.966766		0.532478	0.00176848	0.230408	0.978168	0.478479	0.938123	0.967922	0.868347	0.792663	0.745229	0.696502	0.953571	0.9464	0.813939	0.692078	0.878553	0.578691	0.814646
0.87663	OE		0.987147	0.718212	0.867115	0.874927	0.953876	0.483058	0.917981	0.429319	0.933085	0.998103	0.98475	0	0.888986	0.836533	0.256976		0.670101	0.819231	0.671324	0.974144	0.451251	0.754791		0.893371	0.636946	0.903682	0.354824	0.953909		0.386342		0.072532	1	0.297711	0.928959	0.990128	0.82913	0.772741	0.68228	0.543318	0.922086	0.933884	0.768661	0.716144	0.934887	0.636673	0.8139
0.925123	OE		0.997885	0.655898	0.87024	0.84781	0.902738	0.305296	0.906954	0.229097	0.933206	0.987672	0.984573		0.889226	0.802143	0.142238		0.593981	0.826191	0.654445	0.94521	0.263943	0.682306		0.896446	0.528329	0.902502	0.19655	0.942515		0.235751			0.994279	0.128329	0.952316	0.981287	0.787603	0.749676	0.587381	0.354152	0.87955	0.930475	0.713921	0.748894	0.95659	0.708248	0.818301
0.888992	OE		1	0.561911	0.87795	0.83354	0.843911	0.124637	0.889435	0.0308607	0.91685	0.94131	0.995555		0.900854	0.7627	0.0579943		0.488415	0.83887	0.614501	0.926245	0.103881	0.605575		0.873091	0.34871	0.895365	0.0448958	0.939532		0.114821			0.980063	0.0281826	0.979373	0.962803	0.752491	0.72962	0.450853	0.174175	0.829996	0.934652	0.637949	0.782865	0.956558	0.790557	0.791712
0.882548	OE		0.983584	0.431601	0.893954	0.822194	0.768997	0	0.864253		0.901659	0.906348	0.991016		0.93004	0.678834	0.0071524		0.332445	0.861453	0.505634	0.887905	0	0.498957		0.828996	0.157911	0.883024		0.928018		0.0384507			0.955677		1	0.924879	0.701755	0.702476	0.296792	0.0641017	0.774481	0.933957	0.561577	0.820441	0.95633	0.850307	0.715965
0.830854	OE		0.958452	0.282954	0.899087	0.822656	0.680644		0.840067		0.868582	0.857345	1		0.954631	0.5438			0.1789	0.895522	0.334288	0.829311		0.364296		0.775773	0	0.868096		0.918523		0			0.916918		0.991988	0.882991	0.627975	0.637505	0.150247	0.0122135	0.712552	0.932335	0.480385	0.859137	0.957171	0.895976	0.610905
0.940325	OE		0.92767	0.148479	0.895849	0.814992	0.588502		0.813437		0.865718	0.770645	0.993993		0.982009	0.378768			0.0632353	0.919255	0.146861	0.741974		0.22041		0.708414		0.869984		0.914792					0.884651		0.971057	0.869251	0.525869	0.515117	0.053096		0.633317	0.924353	0.363561	0.875995	0.949857	0.902383	0.474532
0.967773	OE		0.90536	0.0562351	0.884872	0.779579	0.469211		0.792792		0.877781	0.650196	0.970814		1	0.207726			0	0.926256	0	0.61133		0.109399		0.607473		0.86575		0.926992					0.847598		0.961254	0.861606	0.395473	0.341847	0.00348725		0.550202	0.908917	0.23431	0.881025	0.924716	0.887603	0.305439
0.840104	OE		0.858723	0.0153797	0.864411	0.709409	0.316402		0.75973		0.880532	0.50726	0.955675		0.991986	0.0797244				0.928442		0.450559		0.0424167		0.466858		0.867698		0.941301					0.823134		0.961276	0.833411	0.220154	0.166558			0.448901	0.88922	0.116918	0.886087	0.889232	0.871912	0.125916
0.747392	OE		0.800919	0	0.829277	0.618964	0.161753		0.730561		0.903946	0.36853	0.941159		0.97576	0				0.916147		0.277343		0.00683146		0.293392		0.87179		0.931937					0.828265		0.947979	0.772462	0.050611	0.0559549			0.334543	0.865082	0.0449624	0.890343	0.858324	0.875289
0.970019	OE		0.742559		0.756096	0.486156	0.0545211		0.698891		0.895932	0.235749	0.916393		0.961389					0.927883		0.110847				0.122575		0.878813		0.916904					0.855054		0.930415	0.696321		0			0.217421	0.833602		0.909246	0.839577	0.890161
0.721436	OE		0.689454		0.655783	0.324769	0		0.679411		0.876922	0.120032	0.872869		0.956456					0.946996		0				0		0.909497		0.918074					0.884936		0.894307	0.650175					0.111279	0.796963		0.9133	0.794869	0.903015
0.855044	OE		0.638553		0.522544	0.172941			0.650044		0.865937	0.0437892	0.814641		0.960748					0.970515								0.936545		0.934639					0.898398		0.845964	0.624448					0.0377127	0.748812		0.9049	0.782995	0.887922
0.822616	OE		0.599503		0.362401	0.0619203			0.592955		0.845562	0	0.727588		0.955394					0.981894								0.940134		0.930529					0.91002		0.795152	0.603692					0	0.71211		0.908106	0.785224	0.866804
0.855583	OE		0.554581		0.205075	0			0.496597		0.832794		0.644707		0.946699					0.986363								0.935936		0.881907					0.92546		0.739356	0.529413						0.667939		0.915908	0.778319	0.847197
0.81087	OE		0.47481		0.0881585				0.359607		0.807219		0.562122		0.948209					1								0.896016		0.823604					0.933972		0.657318	0.403051						0.607707		0.926637	0.770172	0.856147
0.830158	OE		0.356628		0.0274129				0.199644		0.765176		0.486997		0.93719					0.999117								0.871251		0.742098					0.939148		0.567021	0.249276						0.534989		0.929672	0.754716	0.877252
0.974821	OE		0.213705		0				0.0733821		0.734878		0.399994		0.912627					0.999304								0.854221		0.659149					0.927664		0.453248	0.0816635						0.449146		0.90767	0.7565	0.89597
0.763613	OE		0.102483						0		0.695161		0.303302		0.871156					0.988429								0.854615		0.542063					0.921895		0.309573							0.341752		0.887446	0.734948	0.911489
0.733162	OE		0.038663								0.666371		0.191951		0.836363					0.964217								0.855584		0.387507					0.90679		0.16399							0.214081		0.853491	0.696034	0.909644
0.977296	OE		0.0110671								0.617857		0.0788282		0.785776					0.947765								0.843455		0.233788					0.886927		0.0564305							0.104128		0.819171	0.650734	0.88366
0.900498	OE										0.542067		0.00507879		0.739261					0.933929								0.823077		0.111221					0.858353		0							0.0418329		0.782269	0.608115	0.855781
0.907289	OE										0.447389				0.702223					0.90532								0.77801		0.0442535					0.821265									0.012267		0.755076	0.580376	0.825127
0.781907	OE										0.299452				0.653771					0.854105								0.729464		0.0139154					0.795724									0		0.723464	0.564387	0.797101
0.979161	OE										0.13247				0.574135					0.795711								0.684556							0.779283											0.675639	0.542887	0.766395
0.902959	NE										0				0.445802					0.748221								0.644578							0.759821											0.603021	0.50438	0.751143
0.882826	NE														0.265453					0.716369								0.594104							0.735222											0.502906	0.44092	0.719061
0.929275	NE														0.101771					0.685304								0.527045							0.686555											0.380989	0.339514	0.668391
0.928797	NE														0					0.641491								0.441433							0.621819											0.237674	0.21916	0.605732
0.977137	NE																			0.588162								0.340776							0.529669											0.0974323	0.111853	0.539757
0.958515	NE																			0.552896								0.223149							0.434186											0.00762361	0.0354819	0.456295
0.977389	NE																			0.51277								0.102086							0.333206													0.341478
0.986592	NE																			0.462919								0.00994355							0.213603													0.196192
0.984519	NE																			0.35791															0.105376													0.0704118
0.984776	NE																			0.211383															0.0275153													0
0.879184	NE																			0.0819963
0.981481	NE																			0.00929536
0.990131	NE
0.915205	NE
0.890252	NE
0.923331	NE
0.922675	NE
0.869774	NE
0.977786	NE
0.943264	NE
0.965813	NE
0.922961	NE
0.873386	NE
0.942731	NE
0.965789	NE
0.946072	OE
0.985807	OE
0.858136	OE
0.905013	OE
0.905209	OE
0.924483	OE
0.950735	OE
0.822515	OE
0.878827	OE
0.791267	OE
0.890319	OE
0.926782	OE
0.839444	OE
0.9003	OE
0.804401	OE
0.788264	OE
0.891091	OE
0.902653	OE
0.979519	OE
0.839697	OE
0.845243	OE
0.894504	OE
0.908828	OE
0.978088	OE
0.830629	OE
[truncated: 91 more columns]
