# Supplementary material for: Variations of intracellular density during the cell cycle arise from tip-growth regulation in fission yeast
Source: eLife. 2021 Jun 8;10:e64901. doi: 10.7554/eLife.64901 (PMC8221806; doi:10.7554/eLife.64901)
Supplement: Figure 2—figure supplement 3—source data 2. [file elife-64901-fig2-figsupp3-data2.xlsx]

## Sheet: Fig2_BCD_Vol_Dens_Mass_SArea
Relative cell cycle time
0	0	0	0	0	0	0	0	0	0	0	0	0	0	0	0	0	0	0	0	0	0	0	0	0	0	0	0	0	0	0	0	0	0	0	0	0	0	0	0	0	0	0	0	0	0	0	0	0	0
0.0384615	0.0384615	0.0434783	0.04	0.037037	0.0333333	0.03125	0.0344828	0.0384615	0.037037	0.0357143	0.0416667	0.0333333	0.027027	0.0333333	0.0384615	0.037037	0.0285714	0.037037	0.0344828	0.030303	0.0277778	0.0285714	0.0344828	0.0322581	0.03125	0.0344828	0.0344828	0.0344828	0.04	0.0357143	0.0434783	0.03125	0.0294118	0.0333333	0.03125	0.0344828	0.03125	0.0333333	0.0322581	0.0416667	0.0384615	0.037037	0.0344828	0.0344828	0.0357143	0.030303	0.030303	0.04	0.0322581
0.0769231	0.0769231	0.0869565	0.08	0.0740741	0.0666667	0.0625	0.0689655	0.0769231	0.0740741	0.0714286	0.0833333	0.0666667	0.0540541	0.0666667	0.0769231	0.0740741	0.0571429	0.0740741	0.0689655	0.0606061	0.0555556	0.0571429	0.0689655	0.0645161	0.0625	0.0689655	0.0689655	0.0689655	0.08	0.0714286	0.0869565	0.0625	0.0588235	0.0666667	0.0625	0.0689655	0.0625	0.0666667	0.0645161	0.0833333	0.0769231	0.0740741	0.0689655	0.0689655	0.0714286	0.0606061	0.0606061	0.08	0.0645161
0.115385	0.115385	0.130435	0.12	0.111111	0.1	0.09375	0.103448	0.115385	0.111111	0.107143	0.125	0.1	0.0810811	0.1	0.115385	0.111111	0.0857143	0.111111	0.103448	0.0909091	0.0833333	0.0857143	0.103448	0.0967742	0.09375	0.103448	0.103448	0.103448	0.12	0.107143	0.130435	0.09375	0.0882353	0.1	0.09375	0.103448	0.09375	0.1	0.0967742	0.125	0.115385	0.111111	0.103448	0.103448	0.107143	0.0909091	0.0909091	0.12	0.0967742
0.153846	0.153846	0.173913	0.16	0.148148	0.133333	0.125	0.137931	0.153846	0.148148	0.142857	0.166667	0.133333	0.108108	0.133333	0.153846	0.148148	0.114286	0.148148	0.137931	0.121212	0.111111	0.114286	0.137931	0.129032	0.125	0.137931	0.137931	0.137931	0.16	0.142857	0.173913	0.125	0.117647	0.133333	0.125	0.137931	0.125	0.133333	0.129032	0.166667	0.153846	0.148148	0.137931	0.137931	0.142857	0.121212	0.121212	0.16	0.129032
0.192308	0.192308	0.217391	0.2	0.185185	0.166667	0.15625	0.172414	0.192308	0.185185	0.178571	0.208333	0.166667	0.135135	0.166667	0.192308	0.185185	0.142857	0.185185	0.172414	0.151515	0.138889	0.142857	0.172414	0.16129	0.15625	0.172414	0.172414	0.172414	0.2	0.178571	0.217391	0.15625	0.147059	0.166667	0.15625	0.172414	0.15625	0.166667	0.16129	0.208333	0.192308	0.185185	0.172414	0.172414	0.178571	0.151515	0.151515	0.2	0.16129
0.230769	0.230769	0.26087	0.24	0.222222	0.2	0.1875	0.206897	0.230769	0.222222	0.214286	0.25	0.2	0.162162	0.2	0.230769	0.222222	0.171429	0.222222	0.206897	0.181818	0.166667	0.171429	0.206897	0.193548	0.1875	0.206897	0.206897	0.206897	0.24	0.214286	0.26087	0.1875	0.176471	0.2	0.1875	0.206897	0.1875	0.2	0.193548	0.25	0.230769	0.222222	0.206897	0.206897	0.214286	0.181818	0.181818	0.24	0.193548
0.269231	0.269231	0.304348	0.28	0.259259	0.233333	0.21875	0.241379	0.269231	0.259259	0.25	0.291667	0.233333	0.189189	0.233333	0.269231	0.259259	0.2	0.259259	0.241379	0.212121	0.194444	0.2	0.241379	0.225806	0.21875	0.241379	0.241379	0.241379	0.28	0.25	0.304348	0.21875	0.205882	0.233333	0.21875	0.241379	0.21875	0.233333	0.225806	0.291667	0.269231	0.259259	0.241379	0.241379	0.25	0.212121	0.212121	0.28	0.225806
0.307692	0.307692	0.347826	0.32	0.296296	0.266667	0.25	0.275862	0.307692	0.296296	0.285714	0.333333	0.266667	0.216216	0.266667	0.307692	0.296296	0.228571	0.296296	0.275862	0.242424	0.222222	0.228571	0.275862	0.258065	0.25	0.275862	0.275862	0.275862	0.32	0.285714	0.347826	0.25	0.235294	0.266667	0.25	0.275862	0.25	0.266667	0.258065	0.333333	0.307692	0.296296	0.275862	0.275862	0.285714	0.242424	0.242424	0.32	0.258065
0.346154	0.346154	0.391304	0.36	0.333333	0.3	0.28125	0.310345	0.346154	0.333333	0.321429	0.375	0.3	0.243243	0.3	0.346154	0.333333	0.257143	0.333333	0.310345	0.272727	0.25	0.257143	0.310345	0.290323	0.28125	0.310345	0.310345	0.310345	0.36	0.321429	0.391304	0.28125	0.264706	0.3	0.28125	0.310345	0.28125	0.3	0.290323	0.375	0.346154	0.333333	0.310345	0.310345	0.321429	0.272727	0.272727	0.36	0.290323
0.384615	0.384615	0.434783	0.4	0.37037	0.333333	0.3125	0.344828	0.384615	0.37037	0.357143	0.416667	0.333333	0.27027	0.333333	0.384615	0.37037	0.285714	0.37037	0.344828	0.30303	0.277778	0.285714	0.344828	0.322581	0.3125	0.344828	0.344828	0.344828	0.4	0.357143	0.434783	0.3125	0.294118	0.333333	0.3125	0.344828	0.3125	0.333333	0.322581	0.416667	0.384615	0.37037	0.344828	0.344828	0.357143	0.30303	0.30303	0.4	0.322581
0.423077	0.423077	0.478261	0.44	0.407407	0.366667	0.34375	0.37931	0.423077	0.407407	0.392857	0.458333	0.366667	0.297297	0.366667	0.423077	0.407407	0.314286	0.407407	0.37931	0.333333	0.305556	0.314286	0.37931	0.354839	0.34375	0.37931	0.37931	0.37931	0.44	0.392857	0.478261	0.34375	0.323529	0.366667	0.34375	0.37931	0.34375	0.366667	0.354839	0.458333	0.423077	0.407407	0.37931	0.37931	0.392857	0.333333	0.333333	0.44	0.354839
0.461538	0.461538	0.521739	0.48	0.444444	0.4	0.375	0.413793	0.461538	0.444444	0.428571	0.5	0.4	0.324324	0.4	0.461538	0.444444	0.342857	0.444444	0.413793	0.363636	0.333333	0.342857	0.413793	0.387097	0.375	0.413793	0.413793	0.413793	0.48	0.428571	0.521739	0.375	0.352941	0.4	0.375	0.413793	0.375	0.4	0.387097	0.5	0.461538	0.444444	0.413793	0.413793	0.428571	0.363636	0.363636	0.48	0.387097
0.5	0.5	0.565217	0.52	0.481481	0.433333	0.40625	0.448276	0.5	0.481481	0.464286	0.541667	0.433333	0.351351	0.433333	0.5	0.481481	0.371429	0.481481	0.448276	0.393939	0.361111	0.371429	0.448276	0.419355	0.40625	0.448276	0.448276	0.448276	0.52	0.464286	0.565217	0.40625	0.382353	0.433333	0.40625	0.448276	0.40625	0.433333	0.419355	0.541667	0.5	0.481481	0.448276	0.448276	0.464286	0.393939	0.393939	0.52	0.419355
0.538462	0.538462	0.608696	0.56	0.518519	0.466667	0.4375	0.482759	0.538462	0.518519	0.5	0.583333	0.466667	0.378378	0.466667	0.538462	0.518519	0.4	0.518519	0.482759	0.424242	0.388889	0.4	0.482759	0.451613	0.4375	0.482759	0.482759	0.482759	0.56	0.5	0.608696	0.4375	0.411765	0.466667	0.4375	0.482759	0.4375	0.466667	0.451613	0.583333	0.538462	0.518519	0.482759	0.482759	0.5	0.424242	0.424242	0.56	0.451613
0.576923	0.576923	0.652174	0.6	0.555556	0.5	0.46875	0.517241	0.576923	0.555556	0.535714	0.625	0.5	0.405405	0.5	0.576923	0.555556	0.428571	0.555556	0.517241	0.454545	0.416667	0.428571	0.517241	0.483871	0.46875	0.517241	0.517241	0.517241	0.6	0.535714	0.652174	0.46875	0.441176	0.5	0.46875	0.517241	0.46875	0.5	0.483871	0.625	0.576923	0.555556	0.517241	0.517241	0.535714	0.454545	0.454545	0.6	0.483871
0.615385	0.615385	0.695652	0.64	0.592593	0.533333	0.5	0.551724	0.615385	0.592593	0.571429	0.666667	0.533333	0.432432	0.533333	0.615385	0.592593	0.457143	0.592593	0.551724	0.484848	0.444444	0.457143	0.551724	0.516129	0.5	0.551724	0.551724	0.551724	0.64	0.571429	0.695652	0.5	0.470588	0.533333	0.5	0.551724	0.5	0.533333	0.516129	0.666667	0.615385	0.592593	0.551724	0.551724	0.571429	0.484848	0.484848	0.64	0.516129
0.653846	0.653846	0.73913	0.68	0.62963	0.566667	0.53125	0.586207	0.653846	0.62963	0.607143	0.708333	0.566667	0.459459	0.566667	0.653846	0.62963	0.485714	0.62963	0.586207	0.515152	0.472222	0.485714	0.586207	0.548387	0.53125	0.586207	0.586207	0.586207	0.68	0.607143	0.73913	0.53125	0.5	0.566667	0.53125	0.586207	0.53125	0.566667	0.548387	0.708333	0.653846	0.62963	0.586207	0.586207	0.607143	0.515152	0.515152	0.68	0.548387
0.692308	0.692308	0.782609	0.72	0.666667	0.6	0.5625	0.62069	0.692308	0.666667	0.642857	0.75	0.6	0.486486	0.6	0.692308	0.666667	0.514286	0.666667	0.62069	0.545455	0.5	0.514286	0.62069	0.580645	0.5625	0.62069	0.62069	0.62069	0.72	0.642857	0.782609	0.5625	0.529412	0.6	0.5625	0.62069	0.5625	0.6	0.580645	0.75	0.692308	0.666667	0.62069	0.62069	0.642857	0.545455	0.545455	0.72	0.580645
0.730769	0.730769	0.826087	0.76	0.703704	0.633333	0.59375	0.655172	0.730769	0.703704	0.678571	0.791667	0.633333	0.513514	0.633333	0.730769	0.703704	0.542857	0.703704	0.655172	0.575758	0.527778	0.542857	0.655172	0.612903	0.59375	0.655172	0.655172	0.655172	0.76	0.678571	0.826087	0.59375	0.558824	0.633333	0.59375	0.655172	0.59375	0.633333	0.612903	0.791667	0.730769	0.703704	0.655172	0.655172	0.678571	0.575758	0.575758	0.76	0.612903
0.769231	0.769231	0.869565	0.8	0.740741	0.666667	0.625	0.689655	0.769231	0.740741	0.714286	0.833333	0.666667	0.540541	0.666667	0.769231	0.740741	0.571429	0.740741	0.689655	0.606061	0.555556	0.571429	0.689655	0.645161	0.625	0.689655	0.689655	0.689655	0.8	0.714286	0.869565	0.625	0.588235	0.666667	0.625	0.689655	0.625	0.666667	0.645161	0.833333	0.769231	0.740741	0.689655	0.689655	0.714286	0.606061	0.606061	0.8	0.645161
0.807692	0.807692	0.913043	0.84	0.777778	0.7	0.65625	0.724138	0.807692	0.777778	0.75	0.875	0.7	0.567568	0.7	0.807692	0.777778	0.6	0.777778	0.724138	0.636364	0.583333	0.6	0.724138	0.677419	0.65625	0.724138	0.724138	0.724138	0.84	0.75	0.913043	0.65625	0.617647	0.7	0.65625	0.724138	0.65625	0.7	0.677419	0.875	0.807692	0.777778	0.724138	0.724138	0.75	0.636364	0.636364	0.84	0.677419
0.846154	0.846154	0.956522	0.88	0.814815	0.733333	0.6875	0.758621	0.846154	0.814815	0.785714	0.916667	0.733333	0.594595	0.733333	0.846154	0.814815	0.628571	0.814815	0.758621	0.666667	0.611111	0.628571	0.758621	0.709677	0.6875	0.758621	0.758621	0.758621	0.88	0.785714	0.956522	0.6875	0.647059	0.733333	0.6875	0.758621	0.6875	0.733333	0.709677	0.916667	0.846154	0.814815	0.758621	0.758621	0.785714	0.666667	0.666667	0.88	0.709677
0.884615	0.884615	1	0.92	0.851852	0.766667	0.71875	0.793103	0.884615	0.851852	0.821429	0.958333	0.766667	0.621622	0.766667	0.884615	0.851852	0.657143	0.851852	0.793103	0.69697	0.638889	0.657143	0.793103	0.741935	0.71875	0.793103	0.793103	0.793103	0.92	0.821429	1	0.71875	0.676471	0.766667	0.71875	0.793103	0.71875	0.766667	0.741935	0.958333	0.884615	0.851852	0.793103	0.793103	0.821429	0.69697	0.69697	0.92	0.741935
0.923077	0.923077	NaN	0.96	0.888889	0.8	0.75	0.827586	0.923077	0.888889	0.857143	1	0.8	0.648649	0.8	0.923077	0.888889	0.685714	0.888889	0.827586	0.727273	0.666667	0.685714	0.827586	0.774194	0.75	0.827586	0.827586	0.827586	0.96	0.857143	NaN	0.75	0.705882	0.8	0.75	0.827586	0.75	0.8	0.774194	1	0.923077	0.888889	0.827586	0.827586	0.857143	0.727273	0.727273	0.96	0.774194
0.961538	0.961538	NaN	1	0.925926	0.833333	0.78125	0.862069	0.961538	0.925926	0.892857	NaN	0.833333	0.675676	0.833333	0.961538	0.925926	0.714286	0.925926	0.862069	0.757576	0.694444	0.714286	0.862069	0.806452	0.78125	0.862069	0.862069	0.862069	1	0.892857	NaN	0.78125	0.735294	0.833333	0.78125	0.862069	0.78125	0.833333	0.806452	NaN	0.961538	0.925926	0.862069	0.862069	0.892857	0.757576	0.757576	1	0.806452
1	1	NaN	NaN	0.962963	0.866667	0.8125	0.896552	1	0.962963	0.928571	NaN	0.866667	0.702703	0.866667	1	0.962963	0.742857	0.962963	0.896552	0.787879	0.722222	0.742857	0.896552	0.83871	0.8125	0.896552	0.896552	0.896552	NaN	0.928571	NaN	0.8125	0.764706	0.866667	0.8125	0.896552	0.8125	0.866667	0.83871	NaN	1	0.962963	0.896552	0.896552	0.928571	0.787879	0.787879	NaN	0.83871
NaN	NaN	NaN	NaN	1	0.9	0.84375	0.931034	NaN	1	0.964286	NaN	0.9	0.72973	0.9	NaN	1	0.771429	1	0.931034	0.818182	0.75	0.771429	0.931034	0.870968	0.84375	0.931034	0.931034	0.931034	NaN	0.964286	NaN	0.84375	0.794118	0.9	0.84375	0.931034	0.84375	0.9	0.870968	NaN	NaN	1	0.931034	0.931034	0.964286	0.818182	0.818182	NaN	0.870968
NaN	NaN	NaN	NaN	NaN	0.933333	0.875	0.965517	NaN	NaN	1	NaN	0.933333	0.756757	0.933333	NaN	NaN	0.8	NaN	0.965517	0.848485	0.777778	0.8	0.965517	0.903226	0.875	0.965517	0.965517	0.965517	NaN	1	NaN	0.875	0.823529	0.933333	0.875	0.965517	0.875	0.933333	0.903226	NaN	NaN	NaN	0.965517	0.965517	1	0.848485	0.848485	NaN	0.903226
NaN	NaN	NaN	NaN	NaN	0.966667	0.90625	1	NaN	NaN	NaN	NaN	0.966667	0.783784	0.966667	NaN	NaN	0.828571	NaN	1	0.878788	0.805556	0.828571	1	0.935484	0.90625	1	1	1	NaN	NaN	NaN	0.90625	0.852941	0.966667	0.90625	1	0.90625	0.966667	0.935484	NaN	NaN	NaN	1	1	NaN	0.878788	0.878788	NaN	0.935484
NaN	NaN	NaN	NaN	NaN	1	0.9375	NaN	NaN	NaN	NaN	NaN	1	0.810811	1	NaN	NaN	0.857143	NaN	NaN	0.909091	0.833333	0.857143	NaN	0.967742	0.9375	NaN	NaN	NaN	NaN	NaN	NaN	0.9375	0.882353	1	0.9375	NaN	0.9375	1	0.967742	NaN	NaN	NaN	NaN	NaN	NaN	0.909091	0.909091	NaN	0.967742
NaN	NaN	NaN	NaN	NaN	NaN	0.96875	NaN	NaN	NaN	NaN	NaN	NaN	0.837838	NaN	NaN	NaN	0.885714	NaN	NaN	0.939394	0.861111	0.885714	NaN	1	0.96875	NaN	NaN	NaN	NaN	NaN	NaN	0.96875	0.911765	NaN	0.96875	NaN	0.96875	NaN	1	NaN	NaN	NaN	NaN	NaN	NaN	0.939394	0.939394	NaN	1
NaN	NaN	NaN	NaN	NaN	NaN	1	NaN	NaN	NaN	NaN	NaN	NaN	0.864865	NaN	NaN	NaN	0.914286	NaN	NaN	0.969697	0.888889	0.914286	NaN	NaN	1	NaN	NaN	NaN	NaN	NaN	NaN	1	0.941176	NaN	1	NaN	1	NaN	NaN	NaN	NaN	NaN	NaN	NaN	NaN	0.969697	0.969697	NaN	NaN
NaN	NaN	NaN	NaN	NaN	NaN	NaN	NaN	NaN	NaN	NaN	NaN	NaN	0.891892	NaN	NaN	NaN	0.942857	NaN	NaN	1	0.916667	0.942857	NaN	NaN	NaN	NaN	NaN	NaN	NaN	NaN	NaN	NaN	0.970588	NaN	NaN	NaN	NaN	NaN	NaN	NaN	NaN	NaN	NaN	NaN	NaN	1	1	NaN	NaN
NaN	NaN	NaN	NaN	NaN	NaN	NaN	NaN	NaN	NaN	NaN	NaN	NaN	0.918919	NaN	NaN	NaN	0.971429	NaN	NaN	NaN	0.944444	0.971429	NaN	NaN	NaN	NaN	NaN	NaN	NaN	NaN	NaN	NaN	1	NaN	NaN	NaN	NaN	NaN	NaN	NaN	NaN	NaN	NaN	NaN	NaN	NaN	NaN	NaN	NaN
NaN	NaN	NaN	NaN	NaN	NaN	NaN	NaN	NaN	NaN	NaN	NaN	NaN	0.945946	NaN	NaN	NaN	1	NaN	NaN	NaN	0.972222	1	NaN	NaN	NaN	NaN	NaN	NaN	NaN	NaN	NaN	NaN	NaN	NaN	NaN	NaN	NaN	NaN	NaN	NaN	NaN	NaN	NaN	NaN	NaN	NaN	NaN	NaN	NaN
NaN	NaN	NaN	NaN	NaN	NaN	NaN	NaN	NaN	NaN	NaN	NaN	NaN	0.972973	NaN	NaN	NaN	NaN	NaN	NaN	NaN	1	NaN	NaN	NaN	NaN	NaN	NaN	NaN	NaN	NaN	NaN	NaN	NaN	NaN	NaN	NaN	NaN	NaN	NaN	NaN	NaN	NaN	NaN	NaN	NaN	NaN	NaN	NaN	NaN
NaN	NaN	NaN	NaN	NaN	NaN	NaN	NaN	NaN	NaN	NaN	NaN	NaN	1	NaN	NaN	NaN	NaN	NaN	NaN	NaN	NaN	NaN	NaN	NaN	NaN	NaN	NaN	NaN	NaN	NaN	NaN	NaN	NaN	NaN	NaN	NaN	NaN	NaN	NaN	NaN	NaN	NaN	NaN	NaN	NaN	NaN	NaN	NaN	NaN
Volume (µm3)
83.0868	80.0124	84.0016	92.8296	84.3455	79.2181	80.0985	80.4254	82.6464	76.7314	78.5862	81.498	86.8922	80.9353	90.7827	79.1424	79.8067	80.6944	90.4967	83.4026	94.1128	84.817	93.6665	80.9348	105.049	97.8208	83.7975	109.84	93.8775	98.6247	104.059	88.3504	77.6137	78.5381	104.842	99.4119	91.0593	98.9929	108.063	95.7616	98.7419	95.4292	87.3676	83.0658	86.0236	93.483	72.7201	78.2346	76.8499	70.909
85.416	84.4085	85.3372	96.7161	81.6798	79.3242	80.8181	80.3311	85.6888	77.4554	85.1377	85.8491	90.2905	83.1372	95.0165	83.6293	82.2751	82.2732	93.0247	85.2029	100.249	87.4495	90.431	85.424	107.773	99.8817	87.3515	111.558	92.5828	99.3902	108.027	93.7523	79.762	78.4105	106.859	98.2905	95.4648	101.111	110.232	99.8161	96.4822	92.6831	89.3946	85.1556	89.7467	95.8938	75.212	78.2529	79.1466	74.9077
88.9633	87.9376	88.344	98.2069	82.764	81.382	83.829	82.5099	88.2251	79.9167	89.4743	91.2188	93.6503	86.4287	97.3168	86.2595	84.719	84.08	95.6961	88.4209	103.489	89.0766	90.364	88.1052	110.649	102.103	88.862	114.088	93.208	100.9	111.516	97.4438	81.8941	79.9068	108.864	99.4936	98.4719	103.854	112.589	102.749	101.161	97.7862	91.4283	86.2306	92.08	98.2915	77.172	80.5914	80.5757	77.0819
91.6425	91.2557	90.9188	101.036	84.3153	83.3484	86.3817	84.8215	91.5985	82.5596	94.0185	95.1715	96.9487	89.2637	99.9468	89.0811	86.8366	86.062	97.4582	90.0847	106.678	90.8486	89.9676	90.9352	112.885	104.47	90.7891	116.749	93.8976	102.652	114.316	100.016	84.4699	81.17	111.641	100.774	101.866	106.104	114.681	105.505	103.552	100.963	93.7789	87.9793	94.3192	100.691	79.5867	82.1605	82.3101	79.6333
94.4424	94.0355	94.3043	103.719	86.9525	85.8197	89.6235	88.0328	94.8589	85.8479	97.7904	99.0965	100.037	92.2238	102.348	91.781	89.0412	88.3683	100.228	92.885	108.713	92.1527	90.6834	93.8167	114.239	106.385	92.1042	118.8	95.5748	104.998	117.505	102.947	87.5054	83.0141	114.207	103.003	104.279	108.508	117.675	107.962	109.304	107.303	96.148	89.7698	96.3814	102.475	81.6379	84.4355	84.6403	82.0823
97.6617	96.7267	97.7823	106.15	90.1269	89.0043	92.539	91.1058	98.3899	89.3495	100.675	102.678	102.757	95.3509	103.333	92.0235	91.2576	90.5114	102.772	95.1988	110.407	93.5977	91.532	96.5364	116.205	109.345	93.9045	121.386	97.5102	106.897	120.096	105.904	89.5611	85.1383	117.154	105.712	107.077	111.145	120.448	110.612	111.487	110.511	98.7237	91.5613	98.5909	104.619	84.4034	86.8076	86.306	84.1328
100.169	99.4315	100.865	109.601	92.9787	91.5126	95.52	94.6489	102.56	93.0687	103.625	104.828	106.011	97.8955	106.088	94.4222	93.3655	93.0893	105.274	97.3248	112.388	94.9833	93.0915	99.3651	117.558	112.319	96.1133	123.472	100.26	109.173	123.409	109.199	92.5695	88.0188	120.462	109.016	109.974	113.921	123.247	113.248	113.904	113.87	101.25	93.9561	100.534	107.358	87.6602	89.1684	89.3263	86.7739
103.096	102.23	103.885	114.293	96.3537	94.9069	98.1876	98.0105	105.957	95.5417	105.889	106.961	108.669	100.429	107.805	97.0649	95.7521	96.0592	107.886	99.7633	114.429	96.2966	94.2999	102.653	119.575	115.641	98.2267	125.4	103.41	112.932	126.357	112.343	95.7477	91.1802	124.138	111.987	113.009	117.181	123.376	113.229	116.37	117.181	104.209	96.7817	102.944	109.45	90.6578	91.0436	92.1929	89.1144
106.059	105.076	105.659	117.221	98.8676	97.5266	100.982	100.971	108.887	98.2548	107.411	109.665	111.414	103.176	109.883	100.474	98.3636	98.7964	111.215	103.332	116.88	98.0531	95.985	105.797	121.622	118.588	100.934	126.977	106.416	116.878	130.213	116.919	98.6045	94.4817	127.624	114.74	113.157	117.112	124.154	114.249	119.041	120.298	106.79	99.8326	103.403	109.502	93.1387	93.4649	95.1638	92.5893
109.765	108.413	108.752	120.333	101.322	100.162	104.063	104.125	112.022	101.015	109.575	111.376	113.061	104.189	112.196	103.585	101.358	101.714	113.849	106.148	120.05	99.9135	98.577	107.121	124.692	122.185	103.867	129.804	109.794	120.616	134.128	120.692	101.031	98.353	131.675	117.917	114.272	118.182	124.772	115.204	121.881	123.892	109.775	103.358	106.173	113.121	95.4137	95.4754	97.5568	95.766
111.47	110.008	112.132	124.172	104.073	102.766	107.074	107.077	114.754	103.383	111.35	113.868	115.241	106.743	115.09	108.657	103.424	104.467	116.935	109.645	123.6	101.908	100.522	109.606	127.446	125.49	106.102	132.37	112.757	124.711	138.195	124.408	104.235	102.459	134.6	120.711	115.387	119.484	125.681	116.834	125.021	127.615	109.632	104.127	106.495	114.323	97.8662	97.9701	99.8457	98.9249
115.008	113.16	115.601	127.766	106.273	105.434	110.107	109.972	117.593	106.342	112.506	115.688	118.019	109.189	117.252	112.01	106.366	106.999	120.169	113.073	125.335	103.373	102.578	112.933	130.213	128.601	108.91	135.837	115.975	129.12	141.944	127.932	106.958	106.062	137.69	124.155	116.173	120.359	126.534	118.105	125.235	129.013	112.518	107.216	109.435	117.072	99.951	100.147	101.611	102.604
118.278	116.25	119.074	130.441	108.938	107.217	112.087	112.12	119.699	108.743	115.857	120.773	121.188	111.864	119.864	115.323	108.856	109.225	123.22	115.963	128.392	105.329	105.003	116.202	132.966	131.459	111.77	138.768	119.1	132.488	145.902	131.731	109.54	109.563	140.826	127.757	116.912	121.012	130.271	122.61	128.584	132.429	113.175	108.237	112.13	120.58	102.572	103.331	106.279	108.951
122.214	119.461	124.177	135.375	111.17	109.324	116.842	117.192	124.48	113.181	121.11	125.278	124.37	113.625	123.066	118.013	111.993	111.983	127.115	119.32	131.53	107.063	107.663	119.83	136.217	134.503	115.309	142.637	122.987	136.801	149.831	135.267	112.27	113.177	143.775	131.294	120.573	125.391	133.838	126.269	132.245	136.277	116.397	111.197	115.183	123.748	105.494	105.395	108.789	111.541
125.02	122.997	127.851	140.581	116.02	113.559	121.199	121.476	128.846	117.285	123.943	129.847	129.048	116.709	126.857	121.125	114.799	114.465	131.41	122.561	134.942	109.364	110.423	124.66	138.89	137.172	117.597	146.488	127.069	141.89	153.533	139.234	115.289	116.647	146.656	135.392	123.764	128.927	136.535	130.311	132.802	137.628	119.481	114.246	117.525	126.427	110.638	110.477	114.427	117.076
130.228	128.32	131.554	145.804	118.522	117.059	125.683	126.017	133.157	121.004	128.108	133.922	133.143	118.465	130.685	124.364	118.366	117.606	135.64	125.907	137.906	110.837	113.462	128.389	142.278	140.668	121.028	150.605	130.749	147.5	157.374	142.639	117.54	119.723	150.415	139.354	126.86	132.289	139.813	133.525	136.139	141.15	123.341	117.44	122.465	131.71	113.464	113.228	120.915	122.783
133.994	132.066	135.669	150.69	123.171	120.529	130.504	130.262	137.54	124.977	131.969	138.285	136.435	119.659	134.93	127.57	121.214	120.584	139.958	129.44	142.38	112.886	116.268	131.701	145.292	143.472	123.782	153.73	133.649	152.956	161.731	146.153	120.181	123.033	153.848	142.436	129.799	135.877	143.028	137.711	141.829	147.254	127.095	120.826	125.866	134.954	118.941	118.902	124.479	124.412
137.993	136.28	138.4	156.291	126.337	124.587	136.303	135.213	142.139	129.405	134.618	138.985	138.897	120.481	139.711	131.023	124.063	123.835	145.268	133.252	145.638	114.813	118.653	134.373	148.38	146.922	127.215	158.683	136.86	158.822	166.081	148.795	122.77	126.454	157.681	145.374	133.267	140.153	146.784	141.922	140.14	146.493	132.839	126.311	128.876	138.336	124.015	124.058	127.321	127.011
141.615	140.874	140.04	160.572	130.178	128.424	140.121	136.698	143.563	131.513	136.034	139.027	141.511	121.986	143.981	134.545	126.402	126.546	149.492	136.883	149.448	116.443	121.02	137.744	150.758	148.783	129.846	162.543	140.613	162.9	171.264	150.855	125.265	129.177	161.232	148.071	136.922	144.23	150.82	146.69	141.382	150.116	136.355	129.714	134.138	145.222	125.711	126.636	131.606	132.55
144.98	144.465	141.558	163.162	131.405	130.181	143.083	139.287	143.728	133.195	139.13	138.511	144.696	124.66	147.24	137.76	128.229	128.988	153.048	140.538	151.892	117.774	122.977	141.537	154.758	152.566	133.086	166.915	144.036	166.141	175.729	151.905	127.491	132.03	165.33	150.841	141.164	148.482	155.84	151.341	144.736	154.965	139.484	133.218	137.836	149.367	128.987	129.995	131.997	135.342
147.333	148.209	143.029	165.226	132.968	131.602	146.686	142.029	144.364	135.935	142.239	138.682	148.541	126.97	150.111	139.412	129.583	131.337	155.411	144.32	154.867	119.705	124.865	144.444	157.447	154.806	136.3	171.421	147.863	166.93	180.065	153.11	128.909	134.227	167.39	153.428	145.632	152.639	161.077	156.247	144.777	156.571	145.308	139.643	138.767	150.686	134.745	136.572	132.106	138.704
148.996	150.609	144.676	167.294	132.332	134.391	150.473	145.537	144.817	138.081	145.328	139.076	151.296	130.301	153.072	140.353	129.777	133.892	155.607	146.148	158.27	122.418	126.724	147.604	161.395	159.052	139.212	174.148	151.518	167.97	182.081	152.42	131.369	136.584	171.07	155.845	149.979	157.729	166.398	160.871	145.571	157.458	147.278	142.803	139.281	152.415	137.637	140.33	134.652	145.677
149.897	152.331	147.623	169.129	132.485	137.306	153.934	148.448	144.759	139.997	147.693	139.961	155.557	134.128	155.079	141.241	130.004	136.338	156.6	150.013	161.637	125.618	129.314	149.795	165.807	162.938	140.528	175.533	153.254	167.771	184.675	152.374	133.753	138.724	174.536	158.635	154.212	162.237	172.258	165.085	151.49	162.435	146.076	143.287	139.372	152.235	141.236	143.998	135.065	149.472
151.194	153.687	152.35	169.741	131.608	140.686	156.412	150.881	145.796	141.428	149.438	142.253	158.98	138.013	156.189	139.998	129.745	138.739	157.277	152.087	165.407	129.245	131.747	150.796	170.206	168.477	140.89	176.778	154.115	169.067	185.522	149.196	136.466	141.697	176.318	161.599	156.926	165.688	177.288	168.838	153.636	162.877	144.335	143.059	138.457	151.038	148.098	151.908	136.323	152.937
153.42	155.199	NaN	171.881	131.097	143.398	160.473	151.985	148.446	143.261	151.737	143.747	161.865	141.516	157.638	140.617	129.718	141.457	157.739	153.524	169.682	133.237	134.109	150.918	171.789	171.991	141.307	176.721	154.454	170.582	186.808	NaN	140.068	144.249	177.663	162.344	158.707	168.721	181.423	172.304	159.385	164.442	142.349	141.427	136.915	149.63	151.022	156.052	138.169	156.843
155.641	156.313	NaN	170.744	132.3	146.257	164.671	153.2	149.992	144.848	154.684	NaN	162.425	145.132	159.91	141.469	130.603	144.752	160.404	154.313	173.175	136.557	136.786	151.548	173.866	175.787	141.388	176.983	154.884	175.54	188.022	NaN	143.446	147.414	180.064	162.622	159.722	170.891	182.1	172.511	NaN	166.215	140.088	138.552	137.95	150.536	153.411	158.682	140.637	159.382
160.11	158.614	NaN	NaN	133.532	147.97	168.469	155.084	153.269	145.647	157.055	NaN	164.668	148.68	161.358	146.924	132.009	148.091	163.843	156.385	175.619	140.071	139.904	151.745	174.464	177.553	142.103	180.854	155.398	NaN	191.3	NaN	144.542	149.766	180.274	162.856	159.581	170.752	184.482	174.667	NaN	170.246	138.336	136.343	137.883	149.96	155.466	160.793	NaN	160.877
NaN	NaN	NaN	NaN	136.404	150.354	170.572	156.327	NaN	149.188	161.283	NaN	165.656	150.735	164.36	NaN	135.492	151.08	170.713	157.06	177.331	142.472	141.261	151.722	174.234	178.114	143.496	184.575	157.861	NaN	193.548	NaN	145.634	150.894	179.959	162.523	161.249	171.584	186.035	176.586	NaN	NaN	140.568	137.142	139.452	150.661	156.703	162.436	NaN	161.526
NaN	NaN	NaN	NaN	NaN	151.77	172.518	159.974	NaN	NaN	161.8	NaN	167.437	154.472	169.384	NaN	NaN	153.64	NaN	158.673	177.699	141.907	140.753	152.381	174.507	178.45	145.966	190.132	159.842	NaN	197.592	NaN	145.862	150.652	180.872	162.787	162.39	173.311	188.172	178.446	NaN	NaN	NaN	137.351	141.301	149.416	157.078	163.132	NaN	163.113
NaN	NaN	NaN	NaN	NaN	154.4	174.467	161.866	NaN	NaN	NaN	NaN	169.596	156.698	174.113	NaN	NaN	156.883	NaN	162.705	176.128	142.321	141.029	150.176	177.055	178.633	148.231	193.833	163.901	NaN	NaN	NaN	146.016	149.737	181.151	164.563	168.985	175.429	192.177	180.673	NaN	NaN	NaN	140.764	145.338	NaN	157.505	163.395	NaN	164.823
NaN	NaN	NaN	NaN	NaN	155.845	175.607	NaN	NaN	NaN	NaN	NaN	172.109	158.52	182.356	NaN	NaN	158.253	NaN	NaN	175.942	143.172	140.473	NaN	179.597	180.043	NaN	NaN	NaN	NaN	NaN	NaN	146.981	149.695	182.127	166.961	NaN	177.507	196.262	185.545	NaN	NaN	NaN	NaN	NaN	NaN	158.833	164.522	NaN	166.561
NaN	NaN	NaN	NaN	NaN	NaN	176.398	NaN	NaN	NaN	NaN	NaN	NaN	159.976	NaN	NaN	NaN	158.445	NaN	NaN	177.142	142.585	139.465	NaN	185.777	181.485	NaN	NaN	NaN	NaN	NaN	NaN	148.652	149.682	NaN	169.986	NaN	181.001	NaN	189.516	NaN	NaN	NaN	NaN	NaN	NaN	160.595	165.861	NaN	172.489
NaN	NaN	NaN	NaN	NaN	NaN	180.114	NaN	NaN	NaN	NaN	NaN	NaN	161.826	NaN	NaN	NaN	159.319	NaN	NaN	177.071	142.184	140.308	NaN	NaN	185.279	NaN	NaN	NaN	NaN	NaN	NaN	150.62	151.329	NaN	172.896	NaN	182.243	NaN	NaN	NaN	NaN	NaN	NaN	NaN	NaN	162.425	167.124	NaN	NaN
NaN	NaN	NaN	NaN	NaN	NaN	NaN	NaN	NaN	NaN	NaN	NaN	NaN	162.01	NaN	NaN	NaN	161.39	NaN	NaN	183.308	144.385	142.959	NaN	NaN	NaN	NaN	NaN	NaN	NaN	NaN	NaN	NaN	154.665	NaN	NaN	NaN	NaN	NaN	NaN	NaN	NaN	NaN	NaN	NaN	NaN	166.274	169.425	NaN	NaN
NaN	NaN	NaN	NaN	NaN	NaN	NaN	NaN	NaN	NaN	NaN	NaN	NaN	163.438	NaN	NaN	NaN	161.676	NaN	NaN	NaN	146.185	144.882	NaN	NaN	NaN	NaN	NaN	NaN	NaN	NaN	NaN	NaN	157.554	NaN	NaN	NaN	NaN	NaN	NaN	NaN	NaN	NaN	NaN	NaN	NaN	NaN	NaN	NaN	NaN
NaN	NaN	NaN	NaN	NaN	NaN	NaN	NaN	NaN	NaN	NaN	NaN	NaN	165.7	NaN	NaN	NaN	166.806	NaN	NaN	NaN	147.386	148.126	NaN	NaN	NaN	NaN	NaN	NaN	NaN	NaN	NaN	NaN	NaN	NaN	NaN	NaN	NaN	NaN	NaN	NaN	NaN	NaN	NaN	NaN	NaN	NaN	NaN	NaN	NaN
NaN	NaN	NaN	NaN	NaN	NaN	NaN	NaN	NaN	NaN	NaN	NaN	NaN	168.122	NaN	NaN	NaN	NaN	NaN	NaN	NaN	152.15	NaN	NaN	NaN	NaN	NaN	NaN	NaN	NaN	NaN	NaN	NaN	NaN	NaN	NaN	NaN	NaN	NaN	NaN	NaN	NaN	NaN	NaN	NaN	NaN	NaN	NaN	NaN	NaN
NaN	NaN	NaN	NaN	NaN	NaN	NaN	NaN	NaN	NaN	NaN	NaN	NaN	172.146	NaN	NaN	NaN	NaN	NaN	NaN	NaN	NaN	NaN	NaN	NaN	NaN	NaN	NaN	NaN	NaN	NaN	NaN	NaN	NaN	NaN	NaN	NaN	NaN	NaN	NaN	NaN	NaN	NaN	NaN	NaN	NaN	NaN	NaN	NaN	NaN
Density (mg/ml)
287.7	266.861	308.834	306.782	292.117	277.057	302.318	296.796	309.356	297.952	274.55	271.4	309.617	288.458	320.96	278.594	273.782	272.291	279.677	265.251	293.803	315.64	296.104	276.755	313.514	280.33	270.83	310.488	276.252	274.291	304.377	278.411	280.214	297.983	293.624	315.695	274.87	264.847	282.15	270.037	298.845	286.298	279.954	274.801	287.124	278.074	292.072	293.316	296.16	276.919
290.67	274.048	300.937	304.661	288.398	283.025	303.739	295.893	300.324	298.039	283.112	280.512	309.946	298.896	307.371	280.424	286.53	285.473	284.7	276.307	299.804	309.807	294.834	275.47	305.114	278.056	276.428	310.046	282.817	274.562	298.534	266.571	287.657	297.61	280.824	298.578	276.186	268.427	283.087	272.34	294.667	290.095	281.88	277.565	279.272	258.713	284.67	294.794	291.77	282.625
289.503	273.367	299.123	302.531	289.394	288.31	301.435	299.381	296.544	293.115	290.09	286.051	310.357	296.614	308.564	278.646	288.583	288.965	286.693	280.747	301.654	305.165	283.718	277.314	303.228	278.365	277.125	313.088	285.543	279.793	301.677	267.316	286.211	299.184	283.073	296.123	277.019	266.446	282.165	269.322	291.105	287.072	286.905	282.374	280.564	259.97	286.117	297.707	297.876	284.28
290.239	277.053	296.33	300.154	290.86	292.504	300.911	300.537	294.818	295.11	293.992	288.96	308.647	297.055	304.898	279.759	291.255	292.142	287.939	284.103	302.287	301.342	279.668	276.97	302.596	278.948	276.535	315.923	288.16	281.537	299.7	264.898	288.923	300.822	283.916	291.146	276.534	266.511	283.303	270.112	289.44	284.135	289.193	282.492	277.68	255.76	283.336	296.871	295.769	284.669
289.171	277.462	292.19	297.497	289.519	293.996	301.347	304.767	294.883	294.034	293.434	288.249	307.785	293.247	307.901	278.299	292.205	294.086	289.778	284.833	304.445	297.137	271.231	277.27	302.582	279.113	273.494	314.202	289.774	283.048	302.929	267.353	288.296	304.37	285.613	291.687	279.549	265.34	284.185	268.689	285.797	280.943	290.373	282.115	280.825	261.423	283.088	295.945	294.238	284.762
291.473	280.25	294.754	298.427	289.854	294.122	294.05	301.597	292.127	289.972	297.838	292.033	300.994	286.422	308.395	278.381	290.003	290.04	291.96	284.46	303.169	299.968	269.68	277.597	303.235	279.205	269.252	313.815	287.455	285.285	300.878	267.073	286.567	304.551	284.749	286.609	278.419	263.002	285.306	269.278	286.733	277.749	292.935	281.473	281.377	263.024	285.358	293.468	297.025	282.755
290.112	284.25	291.233	296.009	287.77	289.478	295.47	303.323	293.469	290.623	294.913	290.369	296.256	282.213	303.942	278.755	286.456	287.769	293.38	282.172	305.922	298.077	273.53	279.658	302.845	278.899	264.629	309.527	283.861	284.028	297.13	265.774	287.923	305.492	287.863	291.214	278.002	261.495	285.487	267.551	285.459	273.76	291.922	278.559	281.262	264.252	283.055	289.003	296.688	280.219
294.959	287.508	290.273	295.145	286.938	287.938	292.41	300.409	291.957	288.652	291.655	288.918	288.234	278.723	298.667	277.007	284.325	284.88	290.386	280.227	302.997	299.386	277.006	276.83	304.197	274.807	266.413	306.912	281.831	280.399	295.085	266.942	286	302.446	281.955	286.853	276.355	264.558	285.283	267.932	283.638	273.291	288.262	278.662	279.896	268.085	281.401	285.96	287.86	280.318
298.425	287.594	288.881	293.613	282.979	285.327	290.848	298.747	290.519	283.581	290.846	290.136	285.627	278.501	296.053	272.726	281.442	283.559	291.711	281.857	305.799	299.927	276.99	274.065	301.833	270.989	268.319	303.276	281.242	279.665	292.958	266.292	284.185	296.973	278.277	288.157	276.785	263.34	283.816	264.518	284.227	274.496	288.605	281.157	283.089	271.907	281.263	284.319	286.455	281.015
301.861	288.462	289.864	292.421	281.741	282.435	290.883	295.641	289.4	282.232	286.841	289.361	282.744	277.55	290.443	269.94	276.979	279.977	289.273	279.294	303.922	298.001	279.32	271.002	299.658	267.33	269.938	301.905	278.707	278.137	287.641	264.926	282.07	292.706	274.563	289.53	273.394	262.894	282.738	266.537	285.037	274.105	286.072	281.198	282.349	272.01	281.322	283.473	283.481	275.836
297.699	287.712	286.71	289.573	283.154	284.764	291.681	295.338	290.47	284.868	282.331	288.34	281.416	279.418	285.746	268.262	273.754	278.957	286.813	277.304	303.363	292.795	278.814	267.445	298.442	266.25	272.168	302.225	279.367	277.501	286.088	263.637	281.829	288.539	273.683	293.458	271.781	263.47	279.51	262.907	282.163	272.462	284.094	281.399	280.701	273.489	279.259	283.214	278.002	272.895
299.002	287.332	287.809	286.476	281.493	284.119	289.665	290.587	289.242	284.968	278.973	288.139	277.864	279.007	283.447	267.529	273.623	276.76	282.108	275.98	299.617	290.127	274.938	261.953	299.106	263.578	277.075	302.229	280.379	276.375	284.695	261.555	280.641	284.554	266.074	289.139	269.822	264.385	278.411	264.523	282.783	274.207	281.87	279.185	280.877	275.022	277.677	282.846	270.88	268.398
297.225	287.697	289.22	285.789	281.236	282.664	286.786	288.307	288.385	286.493	280.057	287.881	277.285	281.119	278.202	266.009	271.385	277.485	279.918	276.507	297.276	286.761	272.575	261.335	294.806	263.333	277.571	301.643	281.384	277.218	281.474	258.836	283.706	281.707	265.722	289.937	269.754	261.659	278.251	266.07	284.44	276.299	285.062	274.994	279.393	272.271	276.485	280.351	269.093	262.319
294.105	288.094	288.367	285.834	280.996	282.498	283.272	286.282	284.342	284.007	276.197	283.994	270.944	282.58	273.263	265.843	270.526	276.06	275.216	271.207	294.662	282.131	269.689	260.038	293.602	262.805	278.456	299.902	281.4	277.454	279.825	256.945	286.22	283.422	263.792	288.15	268.576	261.345	275.767	267.402	281.165	276.474	281.639	273.25	277.2	271.083	273.456	278.631	268.248	260.138
293.067	289.874	286.331	284.496	278.952	279.686	276.408	284.959	280.544	278.86	277.28	282.32	267.323	282.689	269.639	264.253	269.224	273.934	271.973	270.495	294.921	279.764	269.718	259.274	296.745	264.265	280.795	300.093	279.711	277.524	280.321	256.354	288.567	285.356	265.325	290.771	267.089	259.777	275.32	264.239	278.099	277.101	282.215	272.916	274.163	269.107	269.326	273.007	273.471	262.756
295.315	289.386	283.675	281.704	274.045	275.183	272.842	283.615	279.503	275.138	279.704	284.083	266.066	280.041	267.635	261.976	268.455	272.888	270.954	269.216	293.295	277.995	269.681	257.791	296.05	261.663	281.412	296.468	279.687	276.221	279.09	254.775	287.715	284.886	263.48	290.616	266.401	257.725	273.687	264.143	279.638	276.871	281.174	269.396	272.701	266.639	266.841	268.152	269.625	261.92
296.117	287.027	281.878	282.142	273.85	275.625	269.264	285.959	278.642	271.5	282.853	284.121	266.195	283.246	265.51	258.699	266.324	272.064	269.641	267.176	294.521	277.124	267.728	256.746	295.168	258.826	279.327	296.033	279.412	279.056	276.504	258.029	287.105	288.81	265.657	291.821	264.416	253.47	273.072	261.618	279.095	275.013	281.342	270.037	272.098	263.308	268.324	267.817	275.756	265.464
293.656	282.923	280.047	282.949	276.003	274.412	269.425	283.851	279.688	266.42	280.841	287.589	265.126	283.388	267.068	257.429	266.957	270.383	270.433	263.785	293.885	276.145	265.566	254.759	295.093	259.492	277.222	297.047	277.784	281.32	274.266	260.823	284.504	295.575	266.086	291.473	261.869	252.154	270.32	258.8	281.051	273.078	275.779	268.915	271.303	258.349	261.824	266.222	282.831	266.6
293.566	281.448	281.935	286.408	278.086	272.793	270.071	281.681	283.136	264.516	281.397	290.277	267.209	278.215	267.398	256.115	269.393	271.304	271.645	264.059	292.485	277.896	266.169	256.785	293.647	259.525	272.297	296.716	273.197	280.608	271.972	266.464	279.132	297.712	262.455	288.099	262.251	252.102	270.362	257.663	286.971	269.742	274.209	266.696	268.812	255.154	262.472	270.611	285.669	264.748
295.136	278.52	287.409	294.106	281.39	272.159	270.939	279.721	286.427	263.863	279.484	296.581	267.474	278.393	269.622	258.041	271.599	271.552	273.586	260.739	290.654	282.352	264.379	258.333	288.045	257.94	268.896	296.919	270.546	284.396	269.69	272.479	274.692	297.178	259.687	284.027	261.147	251.644	269.788	256.166	292.168	267.498	272.749	261.464	268.616	256.173	262.157	277.259	287.755	262.958
298.708	279.335	296.163	302.37	287.107	271.281	271.861	278.912	291.035	262.912	277.859	301.747	266.95	279.314	272.054	261.971	271.736	273.965	275.847	260.78	289.391	283.124	261.101	261.849	284.876	259.677	266.06	299.336	268.121	290.268	271.021	281.459	275.182	297.832	260.097	283.209	258.737	250.911	267.478	257.043	295.912	268.688	271.178	261.285	268.33	259.573	260.481	282.185	300.745	264.636
303.681	284.454	300.814	309.835	293.252	269.547	272.614	276.66	297.704	262.872	278.376	311	266.902	276.59	277.685	266.934	277.624	276.195	280.93	262.08	286.195	283.653	260.395	263.897	283.939	262.699	265.942	300.388	265.427	296.719	274.938	284.612	277.979	296.01	256.313	281.004	261.524	253.921	268.211	255.578	303.079	268.713	270.074	259.168	267.365	264.03	257.588	284.83	310.245	263.626
311.025	290.49	309.626	314.29	296.463	269.43	270.07	278.682	301.385	266.72	280.851	315.822	267.966	276.918	280.442	273.256	280.891	275.518	284.365	261.628	285.491	282.449	259.105	268.017	283.192	262.538	268.205	302.118	267.476	299.248	278.692	288.905	281.725	295.521	257.595	286.313	262.726	253.711	269.816	256.222	305.046	270.71	274.06	256.845	270.047	272.369	259.917	288.944	317.731	264.936
317.482	297.182	305.953	318.084	301.871	267.631	269.211	284.599	307.598	274.806	283.657	326.951	269.197	275.832	286.821	281.089	285.753	274.656	288.799	263.263	282.395	275.841	256.809	272.47	284.757	261.033	274.743	306.58	272.149	303.658	286.487	283.687	284.921	292.824	260.006	288.781	266.418	254.555	270.487	254.886	306.151	275.95	281.159	256.171	275.189	280.835	259.73	287.627	324.637	266.346
320.918	303.761	NaN	317.631	309.202	270.891	275.535	291.363	314.22	282.513	287.088	324.809	273.634	276.376	290.705	286.037	292.836	276.099	292.196	268.413	278.078	270.579	255.735	278.04	287.249	261.31	281.652	312.335	280.388	306.28	295.029	NaN	286.163	290.812	264.202	291.388	270.508	256.977	275.963	256.544	303.247	280.824	285.532	260.939	279.201	287.899	262.285	288.986	332.584	268.288
322.946	308.041	NaN	323.722	315.131	275.262	279.019	295.825	318.141	289.338	290.152	NaN	277.755	275.04	293.063	291.177	300.636	277.152	295.032	271.004	275.847	270.12	256.033	283.426	292.024	260.488	289.8	317.212	287.838	299.01	300.722	NaN	287.898	289.262	267.612	295.004	277.77	261.902	282.11	258.245	NaN	284.195	291.896	265.676	285.981	292.943	264.944	289.497	323.101	269.66
321.361	310.497	NaN	NaN	320.495	277.047	284.817	303.437	323.177	299.42	293.233	NaN	284.22	272.109	297.363	292.031	307.271	277.608	299.386	275.555	276.332	271.719	258.983	291.855	297.466	262.424	298.381	321.23	294.651	NaN	305.096	NaN	288.686	290.467	275.658	302.914	281.184	265.45	288.107	264.08	NaN	285.563	300.563	272.986	290.182	298.438	269.505	291.781	NaN	272.577
NaN	NaN	NaN	NaN	320.759	286.236	292.076	310.316	NaN	297.147	296.164	NaN	291.661	269.321	303.597	NaN	306.989	279.333	298.325	283.095	278.172	270.703	261.619	295.389	302.55	266.852	303.736	324.455	299.736	NaN	311.806	NaN	290.819	289.136	280.321	303.984	287.839	271.163	293.393	268.939	NaN	NaN	304.64	282.935	294.011	303.643	275.175	295.519	NaN	276.929
NaN	NaN	NaN	NaN	NaN	295.739	300.76	313.761	NaN	NaN	304.731	NaN	296.393	271.568	308.254	NaN	NaN	279.652	NaN	288.386	280.329	278.95	267.305	298.658	304.317	274.579	310.629	324.447	303.498	NaN	309.916	NaN	298.15	292.531	284.645	309.738	290.141	277.16	298.822	276.935	NaN	NaN	NaN	292.5	297.048	308.222	280.334	300.222	NaN	280.993
NaN	NaN	NaN	NaN	NaN	302.459	305.815	324.058	NaN	NaN	NaN	NaN	301.323	272.264	315.937	NaN	NaN	282.359	NaN	297.802	287.338	282.818	272.236	294.896	307.297	281.457	310.689	327.917	307.261	NaN	NaN	NaN	305.087	296.329	289.498	308.212	297.499	285.39	301.739	281.48	NaN	NaN	NaN	301.868	298.802	NaN	285.148	301.767	NaN	285.581
NaN	NaN	NaN	NaN	NaN	314.569	308.589	NaN	NaN	NaN	NaN	NaN	296.568	277.423	321.691	NaN	NaN	286.121	NaN	NaN	296.865	287.277	279.364	NaN	306.369	289.08	NaN	NaN	NaN	NaN	NaN	NaN	308.283	301.671	285.319	309.89	NaN	289.15	298.795	287.167	NaN	NaN	NaN	NaN	NaN	NaN	291.126	307.812	NaN	291.448
NaN	NaN	NaN	NaN	NaN	NaN	313.474	NaN	NaN	NaN	NaN	NaN	NaN	283.536	NaN	NaN	NaN	291.124	NaN	NaN	303.678	290.454	287.245	NaN	305.425	296.349	NaN	NaN	NaN	NaN	NaN	NaN	311.837	305.139	NaN	305.417	NaN	295.874	NaN	288.54	NaN	NaN	NaN	NaN	NaN	NaN	296.881	310.188	NaN	297.097
NaN	NaN	NaN	NaN	NaN	NaN	302.949	NaN	NaN	NaN	NaN	NaN	NaN	290.012	NaN	NaN	NaN	297.404	NaN	NaN	314.28	297.995	296.272	NaN	NaN	301.4	NaN	NaN	NaN	NaN	NaN	NaN	302.85	310.875	NaN	313.631	NaN	293.333	NaN	NaN	NaN	NaN	NaN	NaN	NaN	NaN	303.787	312.551	NaN	NaN
NaN	NaN	NaN	NaN	NaN	NaN	NaN	NaN	NaN	NaN	NaN	NaN	NaN	295.594	NaN	NaN	NaN	305.228	NaN	NaN	317.359	300.082	299.08	NaN	NaN	NaN	NaN	NaN	NaN	NaN	NaN	NaN	NaN	316.964	NaN	NaN	NaN	NaN	NaN	NaN	NaN	NaN	NaN	NaN	NaN	NaN	312.337	316.364	NaN	NaN
NaN	NaN	NaN	NaN	NaN	NaN	NaN	NaN	NaN	NaN	NaN	NaN	NaN	301.664	NaN	NaN	NaN	311.089	NaN	NaN	NaN	301.817	305.595	NaN	NaN	NaN	NaN	NaN	NaN	NaN	NaN	NaN	NaN	326.677	NaN	NaN	NaN	NaN	NaN	NaN	NaN	NaN	NaN	NaN	NaN	NaN	NaN	NaN	NaN	NaN
NaN	NaN	NaN	NaN	NaN	NaN	NaN	NaN	NaN	NaN	NaN	NaN	NaN	301.926	NaN	NaN	NaN	315.458	NaN	NaN	NaN	302.119	295.349	NaN	NaN	NaN	NaN	NaN	NaN	NaN	NaN	NaN	NaN	NaN	NaN	NaN	NaN	NaN	NaN	NaN	NaN	NaN	NaN	NaN	NaN	NaN	NaN	NaN	NaN	NaN
NaN	NaN	NaN	NaN	NaN	NaN	NaN	NaN	NaN	NaN	NaN	NaN	NaN	304.713	NaN	NaN	NaN	NaN	NaN	NaN	NaN	296.249	NaN	NaN	NaN	NaN	NaN	NaN	NaN	NaN	NaN	NaN	NaN	NaN	NaN	NaN	NaN	NaN	NaN	NaN	NaN	NaN	NaN	NaN	NaN	NaN	NaN	NaN	NaN	NaN
NaN	NaN	NaN	NaN	NaN	NaN	NaN	NaN	NaN	NaN	NaN	NaN	NaN	300.034	NaN	NaN	NaN	NaN	NaN	NaN	NaN	NaN	NaN	NaN	NaN	NaN	NaN	NaN	NaN	NaN	NaN	NaN	NaN	NaN	NaN	NaN	NaN	NaN	NaN	NaN	NaN	NaN	NaN	NaN	NaN	NaN	NaN	NaN	NaN	NaN
Mass (pg)
23.9041	21.3522	25.9425	28.4785	24.6388	21.9479	24.2152	23.8699	25.5672	22.8623	21.5758	22.1185	26.9033	23.3464	29.1376	22.0486	21.8496	21.9723	25.3099	22.1227	27.6506	26.7716	27.735	22.3991	32.9342	27.4221	22.6949	34.104	25.9338	27.0519	31.6731	24.5977	21.7484	23.403	30.7841	31.3838	25.0295	26.218	30.4899	25.8591	29.5085	27.3212	24.4589	22.8266	24.6994	25.9952	21.2395	22.9474	22.7599	19.636
24.8279	23.1319	25.6811	29.4656	23.5563	22.4507	24.5476	23.7695	25.7344	23.0847	24.1035	24.0817	27.9852	24.8494	29.2053	23.4517	23.5743	23.4867	26.4842	23.5422	30.055	27.0925	26.6621	23.5317	32.883	27.7727	24.1464	34.5881	26.184	27.2887	32.2497	24.9916	22.9441	23.3357	30.0086	29.3474	26.366	27.141	31.2053	27.184	28.4301	26.8869	25.1986	23.6362	25.0638	24.809	21.4106	23.0685	23.0926	21.1708
25.7551	24.0392	26.4258	29.7106	23.9514	23.4633	25.269	24.7019	26.1627	23.4248	25.9556	26.0933	29.065	25.636	30.0284	24.0359	24.4484	24.2962	27.4354	24.8239	31.2179	27.1831	25.6379	24.4328	33.5519	28.4221	24.6259	35.7195	26.6148	28.2311	33.6418	26.0483	23.439	23.9068	30.8165	29.4624	27.2786	27.6714	31.7687	27.6727	29.4484	28.0717	26.2312	24.3493	25.8343	25.5528	22.0802	23.9927	24.0016	21.9129
26.5982	25.2826	26.942	30.3264	24.524	24.3797	25.9932	25.492	27.0049	24.3642	27.6406	27.5008	29.9229	26.5162	30.4736	24.9213	25.2916	25.1424	28.0621	25.5933	32.2475	27.3764	25.1611	25.1863	34.1586	29.1418	25.1064	36.8835	27.0575	28.9002	34.2605	26.4941	24.4053	24.4177	31.6966	29.3399	28.1695	28.2778	32.4894	28.4983	29.9721	28.6872	27.1203	24.8535	26.1905	25.7527	22.5498	24.3911	24.3447	22.6691
27.31	26.0913	27.5547	30.856	25.1744	25.2307	27.0077	26.8295	27.9722	25.2422	28.695	28.5644	30.7897	27.0443	31.5131	25.5426	26.0183	25.9879	29.0439	26.4567	33.0971	27.382	24.5962	26.0125	34.5665	29.6935	25.1899	37.3272	27.6951	29.7195	35.5959	27.5233	25.2274	25.267	32.619	30.0446	29.1511	28.7915	33.4416	29.0081	31.2388	30.1461	27.9187	25.3254	27.0663	26.7894	23.1107	24.9883	24.9044	23.374
28.4657	27.1077	28.8218	31.6781	26.1236	26.1781	27.2111	27.4772	28.7423	25.9089	29.9847	29.9854	30.9293	27.3106	31.8675	25.6176	26.465	26.2519	30.0054	27.0803	33.4721	28.0763	24.6844	26.7982	35.2374	30.5298	25.284	38.0929	28.0298	30.4962	36.1342	28.284	25.6652	25.929	33.3595	30.2979	29.8124	29.2313	34.3646	29.7853	31.9671	30.6944	28.9196	25.7721	27.7412	27.5174	24.0852	25.4752	25.635	23.789
29.0602	28.2634	29.3752	32.4429	26.7565	26.4909	28.2233	28.7091	30.0982	27.0479	30.5605	30.4389	31.4063	27.6274	32.2447	26.3207	26.7451	26.7882	30.8853	27.4624	34.3821	28.3123	25.4633	27.7882	35.6018	31.3255	25.4344	38.2178	28.4599	31.0083	36.6684	29.0221	26.6529	26.889	34.6766	31.747	30.5729	29.7899	35.1855	30.2996	32.5148	31.173	29.5571	26.1723	28.2764	28.3696	24.8127	25.7699	26.5021	24.3157
30.409	29.392	30.1551	33.733	27.6475	27.3273	28.711	29.4433	30.9348	27.5783	30.8832	30.903	31.3222	27.9918	32.1978	26.8876	27.2248	27.3653	31.3287	27.9563	34.6718	28.8298	26.1216	28.4175	36.3743	31.7791	26.1688	38.4867	29.1443	31.6661	37.2859	29.989	27.3838	27.5771	35.0012	32.1238	31.2306	31.0013	35.1971	30.3378	33.007	32.0245	30.0396	26.9694	28.8136	29.3419	25.5112	26.0348	26.5386	24.9804
31.6508	30.2194	30.5227	34.4175	27.9775	27.827	29.3703	30.1648	31.6336	27.8632	31.24	31.8178	31.8228	28.7347	32.531	27.4018	27.6836	28.0146	32.4425	29.1248	35.7417	29.4087	26.5869	28.9953	36.7094	32.136	27.0826	38.5092	29.9286	32.6866	38.1469	31.1344	28.0219	28.0586	35.5147	33.063	31.3203	30.8403	35.2369	30.2208	33.8347	33.0214	30.8202	28.0686	29.2723	29.7744	26.1965	26.5739	27.2602	26.019
33.1338	31.273	31.5233	35.1881	28.5465	28.2893	30.2701	30.7838	32.4192	28.5097	31.4305	32.2278	31.9673	28.9175	32.5867	27.9618	28.0739	28.4777	32.9334	29.6466	36.4857	29.7743	27.5345	29.0299	37.365	32.6636	28.0377	39.1886	30.6003	33.5478	38.5807	31.9745	28.498	28.7886	36.153	34.1406	31.2412	31.0695	35.2777	30.7063	34.7407	33.9595	31.4037	29.0639	29.9779	30.77	26.842	27.0647	27.6555	26.4157
33.1846	31.6506	32.1493	35.9568	29.4686	29.2642	31.2314	31.6239	33.3327	29.4504	31.4376	32.8326	32.4306	29.8259	32.8865	29.1486	28.3127	29.1419	33.5385	30.405	37.4955	29.8383	28.0271	29.3137	38.0352	33.4116	28.8777	40.0054	31.5005	34.6074	39.5358	32.7986	29.3764	29.5634	36.8378	35.4238	31.3599	31.4805	35.129	30.7164	35.2762	34.7702	31.1459	29.3012	29.8932	31.266	27.3301	27.7465	27.7574	26.9961
34.3878	32.5144	33.271	36.6019	29.9152	29.9559	31.8941	31.9564	34.0129	30.304	31.386	33.3342	32.7934	30.4645	33.2346	29.9659	29.1042	29.613	33.9005	31.2059	37.5526	29.9914	28.2025	29.5833	38.9476	33.8964	30.1763	41.0541	32.5169	35.6856	40.4106	33.4613	30.0168	30.1805	36.6359	35.8979	31.346	31.8211	35.2285	31.2416	35.4142	35.3762	31.7154	29.9332	30.7377	32.1975	27.7541	28.3262	27.5245	27.5386
35.1551	33.4448	34.4384	37.2787	30.6373	30.3065	32.145	32.325	34.5195	31.1541	32.4464	34.7683	33.6037	31.4471	33.3465	30.6768	29.5418	30.3082	34.4915	32.0644	38.1678	30.2043	28.6211	30.3677	39.199	34.6175	31.0242	41.8584	33.5128	36.7282	41.0677	34.0967	31.0771	30.8646	37.4205	37.0416	31.5376	31.6638	36.2479	32.6229	36.5745	36.5899	32.262	29.7646	31.3283	32.8303	28.3596	28.969	28.599	28.58
35.9437	34.416	35.8086	38.6947	31.2384	30.8837	33.098	33.5502	35.395	32.1441	33.4503	35.5782	33.6974	32.108	33.6294	31.3729	30.297	30.9141	34.9842	32.3604	38.757	30.2059	29.0355	31.1604	39.9935	35.3479	32.1085	42.7771	34.6086	37.9559	41.9264	34.7561	32.1338	32.0769	37.9265	37.8325	32.3831	32.7703	36.908	33.7647	37.1828	37.677	32.7818	30.3846	31.9288	33.5459	28.848	29.3664	29.1824	29.016
36.6393	35.6536	36.6076	39.9947	32.364	31.7609	33.5004	34.6156	36.1469	32.7061	34.3668	36.6586	34.4975	32.9924	34.2055	32.0076	30.9068	31.3558	35.7401	33.1522	39.7972	30.596	29.7832	32.3212	41.2148	36.2496	33.0206	43.9602	35.5427	39.3778	43.0385	35.6932	33.2687	33.2859	38.9114	39.3681	33.0561	33.4922	37.5909	34.4332	36.9322	38.1369	33.7193	31.1794	32.2208	34.0223	29.7978	30.161	31.2926	30.7626
38.4583	37.1339	37.3185	41.0736	32.4804	32.2126	34.2916	35.7405	37.2178	33.2928	35.8324	38.0451	35.4248	33.1751	34.9758	32.5805	31.7761	32.0932	36.7521	33.8962	40.4472	30.8121	30.5986	33.0975	42.1213	36.8075	34.0588	44.6494	36.5688	40.7426	43.9214	36.3407	33.818	34.1074	39.6315	40.4986	33.7955	34.0941	38.2652	35.2697	38.0698	39.0802	34.6803	31.6378	33.3964	35.1191	30.277	30.3623	32.6018	32.1593
39.6778	37.9065	38.2422	42.5159	33.7305	33.2209	35.1401	37.2496	38.3243	33.9311	37.3278	39.2896	36.3183	33.8929	35.8252	33.0022	32.2822	32.8065	37.7384	34.5832	41.9339	31.2834	31.1282	33.8138	42.8856	37.1344	34.5756	45.5091	37.3431	42.6833	44.7194	37.7116	34.5045	35.5331	40.8709	41.5659	34.3209	34.4407	39.0571	36.0277	39.5836	40.4968	35.7573	32.6276	34.2479	35.5344	31.9147	31.844	34.326	33.0268
40.5225	38.5567	38.7585	44.2223	34.8693	34.1882	36.7234	38.3805	39.7545	34.476	37.8063	39.9707	36.8251	34.1428	37.3124	33.7292	33.1195	33.4829	39.2854	35.1497	42.8007	31.7051	31.5102	34.2327	43.7859	38.125	35.2669	47.1365	38.0176	44.6799	45.5504	38.8091	34.9284	37.3768	41.9568	42.3726	34.8986	35.3402	39.6786	36.7294	39.3863	40.0039	36.6342	33.9669	34.9644	35.739	32.4702	33.0269	36.0104	33.8611
41.5733	39.6487	39.4823	45.989	36.2007	35.0332	37.8427	38.5051	40.6479	34.7872	38.2797	40.3564	37.8131	33.9384	38.5004	34.459	34.0518	34.3326	40.6087	36.1452	43.7114	32.3589	32.2118	35.3706	44.2696	38.6128	35.3566	48.2292	38.4151	45.7111	46.579	40.1975	34.9655	38.4573	42.3161	42.6591	35.9079	36.3608	40.7759	37.7967	40.5725	40.4925	37.3899	34.5943	36.0578	37.0539	32.9955	34.2692	37.5958	35.0923
42.7887	40.2365	40.6851	47.9868	36.9762	35.43	38.7668	38.9614	41.1676	35.1453	38.8846	41.0797	38.7025	34.7044	39.6993	35.5478	34.8269	35.0269	41.8717	36.6438	44.1479	33.2536	32.5125	36.5635	44.5772	39.3529	35.7863	49.5605	38.9685	47.2498	47.3923	41.391	35.0206	39.2364	42.934	42.8428	36.8645	37.3646	42.0437	38.7683	42.2872	41.4528	38.0442	34.8317	37.0248	38.2639	33.8149	36.0423	37.9828	35.5892
44.0095	41.3999	42.3599	49.9592	38.1761	35.701	39.8783	39.6136	42.015	35.7388	39.5225	41.8467	39.653	35.4646	40.8385	36.5221	35.2124	35.9817	42.8696	37.6356	44.8172	33.8915	32.6022	37.8224	44.8528	40.1996	36.264	51.3125	39.6453	48.4545	48.8013	43.0942	35.4735	39.977	43.5375	43.4521	37.6803	38.2989	43.0847	40.1623	42.8412	42.0687	39.4043	36.4866	37.2353	39.1141	35.0984	38.5386	39.7302	36.7062
45.2474	42.8415	43.5205	51.8334	38.8065	36.2248	41.0211	40.2642	43.1127	36.2977	40.4558	43.2526	40.3811	36.0399	42.5057	37.4649	36.0291	36.9803	43.7149	38.3025	45.2959	34.7242	32.9981	38.9522	45.8264	41.7829	37.0224	52.3121	40.217	49.8398	50.0611	43.3805	36.5178	40.4304	43.8475	43.7929	39.2232	40.0506	44.6299	41.1151	44.1196	42.3109	39.7759	37.0099	37.239	40.242	35.4537	39.9702	41.7749	38.4043
46.6217	44.2508	45.7081	53.1557	39.277	36.9944	41.5729	41.3699	43.6281	37.3398	41.4799	44.2028	41.684	37.1424	43.4906	38.5951	36.5169	37.5636	44.5315	39.2476	46.146	35.4808	33.5061	40.1475	46.9551	42.7774	37.6902	53.0317	40.9919	50.205	51.4675	44.0216	37.6816	40.9959	44.9595	45.4191	40.5155	41.1613	46.478	42.2984	46.2114	43.9729	40.0336	36.8026	37.6368	41.4641	36.7097	41.6072	42.9143	39.6006
48.0013	45.673	46.6121	53.9919	39.7287	37.652	42.1077	42.9406	44.8467	38.8653	42.3892	46.5096	42.7971	38.0684	44.7984	39.352	37.0749	38.1055	45.4215	40.0388	46.7103	35.651	33.8338	41.0875	48.4673	43.9779	38.7087	54.1965	41.9423	51.3384	53.1496	42.3251	38.8821	41.4924	45.8439	46.6667	41.8078	42.1767	47.9542	43.0345	47.0356	44.946	40.5812	36.6476	38.1017	42.4167	38.4655	43.6928	44.2555	40.7341
49.2351	47.1433	NaN	54.5948	40.5354	38.8452	44.216	44.2826	46.6445	40.4732	43.5621	46.6903	44.2917	39.1115	45.826	40.2217	37.9861	39.0562	46.0908	41.2077	47.1849	36.0513	34.2964	41.9612	49.3463	44.9431	39.7994	55.1962	43.3069	52.246	55.1139	NaN	40.0822	41.9493	46.939	47.3052	42.9314	43.3574	50.0659	44.2036	48.3331	46.1794	40.6451	36.9039	38.2267	43.0782	39.6108	45.0966	45.9527	42.0793
50.2637	48.1508	NaN	55.2738	41.6918	40.2589	45.9465	45.3203	47.7184	41.9099	44.8819	NaN	45.1144	39.9173	46.8638	41.1924	39.2641	40.1184	47.3244	41.8196	47.7699	36.8868	35.0216	42.9526	50.773	45.7903	40.9741	56.1412	44.5816	52.4884	56.5421	NaN	41.2977	42.6412	48.1874	47.974	44.366	44.7568	51.3724	44.55	NaN	47.2375	40.8911	36.8099	39.451	44.0984	40.6455	45.9379	45.4399	42.979
51.4532	49.2491	NaN	NaN	42.7964	40.9945	47.9827	47.0582	49.5331	43.6097	46.0536	NaN	46.8019	40.4571	47.9817	42.9064	40.5626	41.1112	49.0523	43.0927	48.5291	38.0599	36.2326	44.2876	51.8972	46.5941	42.4007	58.0957	45.788	NaN	58.3649	NaN	41.7273	43.5021	49.694	49.3315	44.8716	45.3262	53.1506	46.1262	NaN	48.6161	41.5788	37.2199	40.0111	44.7538	41.8989	46.9164	NaN	43.8514
NaN	NaN	NaN	NaN	43.7527	43.0366	49.8201	48.5107	NaN	44.3307	47.7663	NaN	48.3153	40.5962	49.8993	NaN	41.5944	42.2016	50.9281	44.463	49.3285	38.5676	36.9566	44.8171	52.7143	47.5299	43.5847	59.8861	47.3164	NaN	60.3494	NaN	42.3533	43.6289	50.4464	49.4045	46.4137	46.5274	54.5815	47.4908	NaN	NaN	42.8228	38.8023	41.0005	45.747	43.1208	48.0031	NaN	44.7312
NaN	NaN	NaN	NaN	NaN	44.8842	51.8863	50.1935	NaN	NaN	49.3055	NaN	49.6271	41.9496	52.2134	NaN	NaN	42.9658	NaN	45.7591	49.8141	39.585	37.6238	45.5097	53.1055	48.9987	45.3413	61.6879	48.5117	NaN	61.2368	NaN	43.4888	44.0703	51.4842	50.4214	47.116	48.0349	56.23	49.4179	NaN	NaN	NaN	40.1752	41.9732	46.0534	44.0345	48.9758	NaN	45.8334
NaN	NaN	NaN	NaN	NaN	46.6996	53.3547	52.4539	NaN	NaN	NaN	NaN	51.1033	42.6632	55.0087	NaN	NaN	44.2973	NaN	48.454	50.6081	40.2508	38.3931	44.2863	54.4086	50.2775	46.0537	63.5612	50.3606	NaN	NaN	NaN	44.5475	44.3714	52.4427	50.7203	50.273	50.0658	57.9871	50.8558	NaN	NaN	NaN	42.4922	43.4273	NaN	44.9123	49.3072	NaN	47.0704
NaN	NaN	NaN	NaN	NaN	49.024	54.1905	NaN	NaN	NaN	NaN	NaN	51.0419	43.9772	58.6623	NaN	NaN	45.2796	NaN	NaN	52.2311	41.1301	39.2431	NaN	55.023	52.047	NaN	NaN	NaN	NaN	NaN	NaN	45.312	45.1587	51.9644	51.7395	NaN	51.3261	58.6422	53.2824	NaN	NaN	NaN	NaN	NaN	NaN	46.2405	50.6418	NaN	48.544
NaN	NaN	NaN	NaN	NaN	NaN	55.2962	NaN	NaN	NaN	NaN	NaN	NaN	45.3589	NaN	NaN	NaN	46.127	NaN	NaN	53.794	41.4144	40.0606	NaN	56.7412	53.7829	NaN	NaN	NaN	NaN	NaN	NaN	46.3553	45.6737	NaN	51.9165	NaN	53.5535	NaN	54.683	NaN	NaN	NaN	NaN	NaN	NaN	47.6776	51.448	NaN	51.246
NaN	NaN	NaN	NaN	NaN	NaN	54.5654	NaN	NaN	NaN	NaN	NaN	NaN	46.9315	NaN	NaN	NaN	47.382	NaN	NaN	55.6498	42.37	41.5692	NaN	NaN	55.8432	NaN	NaN	NaN	NaN	NaN	NaN	45.6152	47.0444	NaN	54.2254	NaN	53.4577	NaN	NaN	NaN	NaN	NaN	NaN	NaN	NaN	49.3427	52.235	NaN	NaN
NaN	NaN	NaN	NaN	NaN	NaN	NaN	NaN	NaN	NaN	NaN	NaN	NaN	47.8892	NaN	NaN	NaN	49.2608	NaN	NaN	58.1746	43.3274	42.7562	NaN	NaN	NaN	NaN	NaN	NaN	NaN	NaN	NaN	NaN	49.0233	NaN	NaN	NaN	NaN	NaN	NaN	NaN	NaN	NaN	NaN	NaN	NaN	51.9334	53.6	NaN	NaN
NaN	NaN	NaN	NaN	NaN	NaN	NaN	NaN	NaN	NaN	NaN	NaN	NaN	49.3033	NaN	NaN	NaN	50.2956	NaN	NaN	NaN	44.1211	44.2753	NaN	NaN	NaN	NaN	NaN	NaN	NaN	NaN	NaN	NaN	51.4691	NaN	NaN	NaN	NaN	NaN	NaN	NaN	NaN	NaN	NaN	NaN	NaN	NaN	NaN	NaN	NaN
NaN	NaN	NaN	NaN	NaN	NaN	NaN	NaN	NaN	NaN	NaN	NaN	NaN	50.0292	NaN	NaN	NaN	52.6204	NaN	NaN	NaN	44.5281	43.7488	NaN	NaN	NaN	NaN	NaN	NaN	NaN	NaN	NaN	NaN	NaN	NaN	NaN	NaN	NaN	NaN	NaN	NaN	NaN	NaN	NaN	NaN	NaN	NaN	NaN	NaN	NaN
NaN	NaN	NaN	NaN	NaN	NaN	NaN	NaN	NaN	NaN	NaN	NaN	NaN	51.2288	NaN	NaN	NaN	NaN	NaN	NaN	NaN	45.0742	NaN	NaN	NaN	NaN	NaN	NaN	NaN	NaN	NaN	NaN	NaN	NaN	NaN	NaN	NaN	NaN	NaN	NaN	NaN	NaN	NaN	NaN	NaN	NaN	NaN	NaN	NaN	NaN
NaN	NaN	NaN	NaN	NaN	NaN	NaN	NaN	NaN	NaN	NaN	NaN	NaN	51.6498	NaN	NaN	NaN	NaN	NaN	NaN	NaN	NaN	NaN	NaN	NaN	NaN	NaN	NaN	NaN	NaN	NaN	NaN	NaN	NaN	NaN	NaN	NaN	NaN	NaN	NaN	NaN	NaN	NaN	NaN	NaN	NaN	NaN	NaN	NaN	NaN
Surface area (µm2)
93.3423	91.5297	93.1421	99.344	93.224	94.4206	92.8316	92.5588	96.6219	94.2858	90.9824	96.3467	99.4124	96.2805	100.774	95.1878	89.6101	89.937	107.335	97.472	104.162	93.5003	101.296	97.2676	109.516	111.465	96.5309	116.037	104.761	105.834	114.311	104.65	94.5036	92.0282	112.662	104.567	106.072	104.881	114.032	106.086	108.196	108.535	97.8809	93.5777	97.6968	106.46	87.2367	87.8988	91.5883	87.7625
96.8432	97.0307	95.4486	103.963	92.2032	93.1411	94.0369	92.2167	98.1494	93.997	97.0606	99.3747	101.344	96.7895	104.429	97.4246	91.4616	92.7999	108.205	100.286	108.401	96.0991	100.521	100.553	111.618	112.714	99.2587	119.065	105.174	108.202	116.814	107.495	95.9942	91.1279	114.604	106.884	108.248	107.498	117.206	111.629	107.581	106.534	99.3028	95.3412	100.053	107.574	89.098	88.9106	91.8052	91.2214
99.8321	100.326	98.6543	106.307	93.2353	94.7881	96.3995	93.5707	100.657	95.8472	101.564	103.107	104.066	99.5459	106.082	99.5357	93.8524	94.9618	109.868	103.161	110.691	97.4523	101.545	102.585	113.636	115.07	101.283	121.458	106.794	110.686	119.326	110.71	97.4264	91.827	117.035	109.038	110.274	110.015	119.288	114.608	110.821	110.581	101.244	96.7365	101.742	109.196	91.516	91.0891	93.4458	93.2788
102.533	104.017	101.576	109.46	95.252	96.2404	98.4356	95.3954	103.423	97.783	105.542	105.8	106.726	101.872	108.408	101.495	95.9237	97.5936	111.103	105.273	112.856	99.212	102.214	104.936	115.688	117.39	103.425	124.122	108.345	113.45	121.101	113.023	99.4555	92.5752	120.139	111.261	112.466	112.226	121.599	117.839	113.061	113.217	103.28	98.328	103.6	111.049	93.9083	92.8522	94.6667	95.6427
105.21	106.845	105.298	112.245	97.4691	98.2532	101.082	98.1306	106.382	100.563	108.829	108.642	109.446	104.958	110.372	104.362	98.4975	99.8675	113.409	107.689	114.516	100.845	103.299	107.162	117.13	119.491	105.436	126.221	110.497	116.272	123.402	116.021	101.577	93.9968	123.03	113.637	114.232	114.486	123.833	120.317	117.177	118.265	105.685	100.041	105.748	112.663	95.9626	95.1111	97.161	97.6533
107.869	109.55	108.639	115.047	100.44	101.043	103.562	100.683	109.566	103.398	111.693	111.243	112.06	108.24	111.347	105.283	100.87	102.251	115.488	110.083	116.297	102.029	104.749	109.974	119.309	122.564	107.709	128.683	113.058	119.045	125.803	119.026	103.471	95.7912	126.022	116.401	116.19	117.501	126.402	122.95	119.37	121.123	108.037	102.536	107.694	114.838	99.039	97.4154	99.2411	99.9961
110.558	112.641	112.093	118.516	103.661	103.563	106.44	103.753	112.916	106.559	114.402	112.928	115.031	110.944	114.103	108.072	103.296	104.814	118.003	112.129	118.295	103.521	106.621	112.481	121.443	125.593	110.331	131.102	116.124	121.71	128.984	121.78	106.152	98.4421	129.586	119.481	118.444	120.39	128.877	125.703	121.851	124.204	110.293	105.061	109.796	117.35	101.921	99.7271	102.161	102.754
113.429	115.334	115.272	122.942	106.868	106.298	108.739	106.96	116.099	108.93	116.684	115.172	118.015	113.891	116.485	110.769	106.152	108.063	120.858	114.591	120.414	105.003	108.069	116.048	123.674	128.806	112.842	133.21	119.099	125.257	131.804	124.852	108.912	101.369	133.409	122.268	121.053	123.055	130.015	126.699	124.421	127.257	112.937	107.705	112.187	119.733	104.637	102.123	105.125	104.766
116.418	118.215	117.812	126.306	109.215	108.854	111.682	109.824	118.825	111.628	118.935	118.165	120.929	116.609	118.884	114.182	109.045	110.833	123.917	117.548	122.976	106.704	110.015	119.248	126.008	132.006	115.914	135.52	122.355	129.131	135.731	128.662	111.679	104.262	136.86	125.111	121.845	124.161	131.709	128.368	126.884	130.217	115.726	110.893	113.131	120.606	107.217	104.904	108.341	108.009
119.827	121.409	121.013	130.034	111.971	111.692	114.829	112.822	122.358	114.246	121.566	120.218	123.229	118.006	121.665	117.179	111.847	113.877	126.969	120.519	125.999	108.358	112.624	121.437	129.011	135.444	118.863	138.568	125.789	133.181	139.802	132.264	114.083	107.841	140.8	128.18	123.776	126.298	133.341	129.657	130.053	133.905	118.312	114.042	115.304	123.742	109.899	107.366	110.878	111.06
122.083	123.517	124.507	134.115	114.606	114.357	118.086	116.028	125.113	117.135	123.898	123.474	125.95	120.503	125.269	121.776	114.315	116.739	130.464	123.638	129.347	110.387	114.687	124.045	132.05	138.711	121.566	141.391	128.831	137.1	143.998	135.946	117.498	112.111	144.309	131.134	125.582	128.038	135.181	131.828	133.119	137.396	119.317	115.246	116.563	125.35	112.318	110.301	113.581	114.169
125.439	126.752	128.083	137.984	116.933	116.995	121.597	119.258	128.142	120.17	125.851	126.134	128.827	122.94	128.126	125.093	116.788	119.442	133.628	127.208	131.78	112.107	116.769	127.566	135.061	142.032	124.369	144.938	132.096	141.336	147.821	139.92	120.409	115.792	147.542	134.292	127.091	130.016	136.885	133.346	134.556	139.336	122.339	118.341	119.173	127.8	114.51	112.691	115.921	117.406
128.689	130.355	131.402	141.532	119.722	119.567	124.655	121.968	130.82	123.254	129.488	130.506	132.13	125.22	131.191	128.684	119.227	121.627	136.834	130.037	135.065	113.936	118.952	130.92	138.199	144.784	127.574	148.061	135.359	145.234	151.588	143.761	123.362	119.368	150.681	137.805	128.472	131.978	140.329	137.67	138.226	142.454	124.007	120.096	121.88	130.786	117.38	115.883	120.028	122.6
132.334	133.675	136.087	146.583	122.367	121.993	129.291	126.487	135.472	127.484	133.931	134.554	135.404	126.416	135.066	132.075	122.052	124.017	140.843	133.343	138.732	115.717	121.41	134.389	141.721	147.506	131.028	151.918	138.984	149.583	155.8	147.544	126.423	123.123	153.808	141.131	131.697	136.273	143.768	141.094	142.399	145.839	126.816	123.024	125.187	133.749	120.378	118.364	123.14	125.353
135.109	137.416	139.768	151.542	126.677	125.864	133.694	130.832	139.785	131.597	136.913	138.909	139.632	128.557	139.149	135.467	124.853	126.33	144.521	136.605	142.361	118.102	123.857	138.688	145.269	150.614	133.753	155.948	142.458	154.336	159.53	151.346	129.987	126.703	156.885	144.497	134.598	139.379	146.734	145.241	144.408	147.726	129.787	126.339	128.058	136.522	124.739	122.902	128.317	129.987
139.76	142.615	143.529	156.484	130.091	129.433	138.322	135.166	144.304	135.49	140.93	142.403	143.417	129.824	143.302	139.179	127.904	129.14	148.704	139.978	145.609	119.718	126.653	142.296	148.952	153.954	137.055	160.029	145.848	159.438	163.706	154.716	132.72	129.494	160.513	147.914	137.56	142.354	150.253	148.594	147.717	151.202	133.369	129.769	132.402	140.956	128.015	126.069	133.712	134.853
143.162	146.646	147.644	161.102	134.179	133.031	142.886	139.225	148.718	139.719	144.769	146.164	147.11	130.635	147.502	142.941	130.802	131.569	153.358	143.248	149.663	121.744	129.32	145.704	152.604	156.757	140.245	163.273	148.886	164.728	168.125	158.284	135.719	132.9	163.995	150.617	140.55	145.745	153.897	152.639	152.741	156.452	136.699	133.447	136.226	144.578	133.075	131.29	137.311	137.206
146.777	150.595	151.921	165.951	137.567	136.844	148.306	144.241	152.793	144.218	147.796	147.935	150.333	131.611	152.208	146.704	133.369	134.507	158.074	146.973	152.939	124.134	131.883	148.544	156.291	160.222	143.381	167.966	152.153	169.718	172.98	161.944	138.634	136.497	167.72	153.342	143.883	149.545	158.141	156.729	152.805	157.448	141.269	138.494	139.878	148.445	137.827	136.154	140.369	140.488
150.233	155.044	155.84	170.06	140.909	140.762	152.437	146.925	154.776	147.164	150.351	150.3	153.8	133.816	156.396	150.31	135.457	137.059	162.213	150.795	156.415	126.169	134.296	152.046	159.414	162.468	146.226	171.605	155.77	173.619	178.189	166.078	141.515	139.768	171.321	156.247	147.648	153.347	162.229	161.268	155.447	161.138	144.798	142.245	144.69	154.528	140.424	139.254	144.226	145.084
153.661	159.071	160.829	173.921	142.682	143.363	155.968	150.242	155.662	149.995	153.714	152.621	157.89	137.071	160.114	154.096	137.192	139.786	166.129	154.333	159.273	127.901	136.578	155.366	163.425	165.907	149.436	175.313	159.45	177.72	182.511	170.542	144.145	142.756	175.44	159.424	151.595	157.366	167.37	165.421	160.104	165.367	148.169	146.048	148.978	158.808	144.085	142.45	146.484	148.314
157.096	163.499	166.426	178.072	144.207	145.628	159.896	153.479	157.839	153.72	157.336	156.623	162.304	139.877	163.389	157.35	139.031	142.037	169.041	158.06	162.482	130.342	138.667	158.078	166.535	168.73	152.122	178.482	163.142	181.079	186.661	175.748	146.352	145.193	178.074	161.961	155.88	161.646	172.321	169.924	164.268	168.579	153.297	151.784	151.412	161.477	149.03	147.847	149.509	151.662
160.962	167.903	171.71	183.129	145.617	148.991	163.86	157.409	160.877	157.785	160.857	161.458	165.807	143.739	166.348	160.758	140.698	145.247	171.059	160.596	165.945	133.343	140.786	160.762	170.405	172.696	154.451	180.567	166.591	185.447	189.773	179.773	149.354	148	181.86	165.021	159.823	166.343	177.356	174.403	169.151	172.054	156.871	155.357	153.43	164.328	152.004	151.554	155.039	157.454
165.465	173.055	178.422	188.667	148.325	152.579	166.969	160.704	164.766	162.34	164.437	166.784	170.042	147.645	168.842	165.235	143.506	147.932	174.66	164.698	169.57	136.64	143.397	163.056	174.111	175.944	156.347	182.359	168.729	190.02	193.572	184.676	152.228	150.288	185.349	168.001	164.18	170.606	182.52	178.398	177.546	178.812	159.449	157.65	155.301	166.594	155.217	155.409	159.995	161.262
170.866	178.522	183.141	193.834	151.611	156.304	169.413	164.617	170.182	167.607	168.494	172.847	173.698	151.496	170.602	168.969	147.118	151.017	178.97	168.268	173.293	140.487	145.857	165.255	177.778	180.697	158.241	184.68	171.26	195.738	196.798	185.552	154.943	153.072	187.898	170.706	168.296	173.984	187.091	181.93	183.861	183.568	162.472	160.263	157.386	168.86	160.511	161.91	165.479	165.144
176.569	183.648	NaN	200.025	155.86	160.537	172.766	168.255	176.737	173.596	173.901	177.037	177.734	155.169	173.29	174.058	151.545	153.785	183.847	172.111	177.251	144.417	147.873	168.074	179.793	183.925	161.107	186.866	174.178	201.84	201.77	NaN	158.207	155.54	190.812	172.044	172.28	177.255	191.368	185.37	190.703	189.171	165.996	162.634	159.427	172.138	163.025	166.209	171.742	169.269
182.837	189.092	NaN	203.555	161.414	165.616	176.201	173.053	182.84	178.852	179.714	NaN	181.061	158.918	177.275	179.609	156.806	157.286	189.88	176.617	180.625	147.967	150.356	172.369	183.018	187.294	165.099	190.963	178.543	208.859	207.299	NaN	161.523	158.67	195.139	173.629	176.825	180.023	194.406	187.716	NaN	194.792	169.189	165.055	164.182	177.356	165.522	169.416	176.044	173.265
187.327	192.438	NaN	NaN	167.272	170.552	180.231	178.84	187.667	184.007	185.553	NaN	186.337	162.475	182.248	186.659	162.827	160.356	197.011	182.643	183.687	151.389	152.763	176.972	186.116	190.115	170.208	198.317	183.478	NaN	214.162	NaN	163.985	160.974	198.782	175.835	181.567	181.905	199.547	191.705	NaN	200.722	173.14	168.234	168.586	181.601	167.863	172.171	NaN	177.203
NaN	NaN	NaN	NaN	172.634	176.356	184.35	184.117	NaN	188.163	192.666	NaN	191.211	164.966	188.527	NaN	168.845	163.391	203.422	187.427	186.606	153.831	154.086	181.566	190.034	193.681	175.756	205.215	189.768	NaN	220.912	NaN	167.426	162.817	202.917	178.475	187.121	185.241	204.791	196.512	NaN	NaN	177.211	173.201	174.371	187.118	170.512	175.158	NaN	181.396
NaN	NaN	NaN	NaN	NaN	181.905	189.471	191.223	NaN	NaN	196.207	NaN	197.063	168.567	196.378	NaN	NaN	166.219	NaN	193.337	189.811	153.984	154.435	187.009	194.795	197.541	182.163	213.911	196.155	NaN	227.361	NaN	171.413	164.668	208.127	182.36	192.772	190.192	210.726	202.008	NaN	NaN	NaN	178.085	180.41	189.165	173.535	178.32	NaN	187.03
NaN	NaN	NaN	NaN	NaN	188.301	195.135	194.867	NaN	NaN	NaN	NaN	203.174	170.783	204.413	NaN	NaN	170.178	NaN	198.429	192.765	155.077	156.333	188.686	201.214	201.962	187.19	219.672	201.207	NaN	NaN	NaN	175.894	167.311	213.113	187.882	199.841	195.589	218.404	208.03	NaN	NaN	NaN	183.154	186.584	NaN	177.631	182.29	NaN	192.381
NaN	NaN	NaN	NaN	NaN	192.552	200.446	NaN	NaN	NaN	NaN	NaN	208.525	172.954	212.759	NaN	NaN	173.915	NaN	NaN	196.983	157.33	158.266	NaN	207.852	207.6	NaN	NaN	NaN	NaN	NaN	NaN	180.877	171.414	217.879	193.972	NaN	201.35	224.228	215.644	NaN	NaN	NaN	NaN	NaN	NaN	182.594	187.523	NaN	198.251
NaN	NaN	NaN	NaN	NaN	NaN	205.86	NaN	NaN	NaN	NaN	NaN	NaN	175.751	NaN	NaN	NaN	177.808	NaN	NaN	202.364	159.557	161.33	NaN	215.298	213.288	NaN	NaN	NaN	NaN	NaN	NaN	186.748	175.932	NaN	200.356	NaN	208.283	NaN	221.116	NaN	NaN	NaN	NaN	NaN	NaN	188.7	193.247	NaN	204.162
NaN	NaN	NaN	NaN	NaN	NaN	211.336	NaN	NaN	NaN	NaN	NaN	NaN	179.726	NaN	NaN	NaN	182.747	NaN	NaN	207.272	163.084	166.229	NaN	NaN	219.675	NaN	NaN	NaN	NaN	NaN	NaN	190.882	181.676	NaN	206.135	NaN	212.139	NaN	NaN	NaN	NaN	NaN	NaN	NaN	NaN	194.829	199.283	NaN	NaN
NaN	NaN	NaN	NaN	NaN	NaN	NaN	NaN	NaN	NaN	NaN	NaN	NaN	183.643	NaN	NaN	NaN	188.142	NaN	NaN	214.476	168.912	172.56	NaN	NaN	NaN	NaN	NaN	NaN	NaN	NaN	NaN	NaN	188.76	NaN	NaN	NaN	NaN	NaN	NaN	NaN	NaN	NaN	NaN	NaN	NaN	201.701	204.177	NaN	NaN
NaN	NaN	NaN	NaN	NaN	NaN	NaN	NaN	NaN	NaN	NaN	NaN	NaN	189.041	NaN	NaN	NaN	193.035	NaN	NaN	NaN	174.693	178.926	NaN	NaN	NaN	NaN	NaN	NaN	NaN	NaN	NaN	NaN	193.658	NaN	NaN	NaN	NaN	NaN	NaN	NaN	NaN	NaN	NaN	NaN	NaN	NaN	NaN	NaN	NaN
NaN	NaN	NaN	NaN	NaN	NaN	NaN	NaN	NaN	NaN	NaN	NaN	NaN	195.079	NaN	NaN	NaN	198.194	NaN	NaN	NaN	180.239	184.43	NaN	NaN	NaN	NaN	NaN	NaN	NaN	NaN	NaN	NaN	NaN	NaN	NaN	NaN	NaN	NaN	NaN	NaN	NaN	NaN	NaN	NaN	NaN	NaN	NaN	NaN	NaN
NaN	NaN	NaN	NaN	NaN	NaN	NaN	NaN	NaN	NaN	NaN	NaN	NaN	201.44	NaN	NaN	NaN	NaN	NaN	NaN	NaN	186.545	NaN	NaN	NaN	NaN	NaN	NaN	NaN	NaN	NaN	NaN	NaN	NaN	NaN	NaN	NaN	NaN	NaN	NaN	NaN	NaN	NaN	NaN	NaN	NaN	NaN	NaN	NaN	NaN
NaN	NaN	NaN	NaN	NaN	NaN	NaN	NaN	NaN	NaN	NaN	NaN	NaN	207.06	NaN	NaN	NaN	NaN	NaN	NaN	NaN	NaN	NaN	NaN	NaN	NaN	NaN	NaN	NaN	NaN	NaN	NaN	NaN	NaN	NaN	NaN	NaN	NaN	NaN	NaN	NaN	NaN	NaN	NaN	NaN	NaN	NaN	NaN	NaN	NaN
[truncated: 28 more columns]
