# Supplementary material for: Variations of intracellular density during the cell cycle arise from tip-growth regulation in fission yeast
Source: eLife. 2021 Jun 8;10:e64901. doi: 10.7554/eLife.64901 (PMC8221806; doi:10.7554/eLife.64901)
Supplement: Figure 2—source data 1. [file elife-64901-fig2-data1.xlsx]

## Sheet: Fig2BCD_CellCycle
Rel. cell cycle	Mean volume (µm3)	STD		Mean density (mg/ml)	STD		Mean mass (pg)	STD
0	88.4937	9.49571		286.46	13.7934		25.3515	3.01573
0.0526316	92.6384	10.3932		287.365	12.9581		26.6244	3.09853
0.105263	96.4935	9.55834		286.614	14.5292		27.6504	3.25917
0.157895	100.293	9.92914		286.026	13.8687		28.674	3.0527
0.210526	104.011	9.89533		284.821	13.4926		29.6102	3.13685
0.263158	108.083	9.8465		283.095	12.6223		30.5795	3.03185
0.315789	111.941	9.47512		281.389	12.7333		31.4823	3.00098
0.368421	116.343	10.3031		279.945	11.9335		32.5514	3.167
0.421053	120.915	10.1862		278.307	11.572		33.6343	3.12979
0.473684	125.638	10.7354		276.571	12.4619		34.7256	3.27355
0.526316	130.399	11.0017		275.198	13.0003		35.8616	3.437
0.578947	135.855	11.0723		273.638	12.583		37.1491	3.36794
0.631579	140.986	11.7223		272.501	12.7328		38.3972	3.49372
0.684211	146.11	11.8909		272.229	12.2069		39.7643	3.69221
0.736842	150.54	13.1119		273.768	13.4072		41.212	3.87179
0.789474	153.645	13.2965		277.459	12.9598		42.6378	4.07
0.842105	156.104	13.2602		283.34	14.6006		44.2347	4.12108
0.894737	158.234	13.5287		289.961	13.8139		45.8895	4.53689
0.947368	159.201	13.8894		298.516	14.0809		47.5263	4.53908
1	162.387	14.9768		304.803	12.5076		49.4773	4.82003
