# Supplementary material for: Variations of intracellular density during the cell cycle arise from tip-growth regulation in fission yeast
Source: eLife. 2021 Jun 8;10:e64901. doi: 10.7554/eLife.64901 (PMC8221806; doi:10.7554/eLife.64901)
Supplement: Figure 3—source data 1. [file elife-64901-fig3-data1.xlsx]

## Sheet: Fig3_cdc25
WT cells
Time (min)		Volume (um3)
0		91.0717	97.684	77.0774	65.3055	68.125	54.2678	78.7704	65.7146	84.0494	75.9653	81.5787	81.4593	74.3567	88.904	94.0843	81.3945	96.7565	63.1589	75.5288	67.6643	83.0045	98.3553	82.7955	84.0889	83.0158	89.4186	97.6387	78.5597	73.2906	75.5348	77.4782	92.3292	100.537
10		98.4736	109.264	83.6562	83.4111	82.6441	72.6809	84.8095	67.615	87.5016	87.9074	88.0009	83.7652	94.2224	100.769	78.7131	104.232	76.1373	81.32	71.6412	89.3155	99.525	86.0947	91.8407	88.6748	102.797	110.114	80.4867	73.7882	75.0814	84.8437	102.982	102.504	NaN
20		96.1194	104.991	115.323	89.787	90.9764	91.2184	81.2631	90.5219	72.4327	89.847	95.3355	92.6487	91.033	106.656	84.5701	112.478	82.0993	86.7397	80.2391	94.6306	103.819	89.2213	96.5961	91.6576	110.958	118.67	86.063	78.3275	80.288	89.6241	111.633	107.928	NaN
30		99.345	112.782	122.565	95.9078	99.847	100.597	90.7746	96.492	77.0104	95.1363	102.785	98.4486	98.3367	113.341	88.3485	121.039	89.5838	92.1987	84.8078	98.8354	107.692	93.592	101.765	96.5239	120.719	129.056	91.622	81.8376	83.8384	95.2192	119.654	112.017	NaN
40		106.481	103.479	119.998	127.493	101.451	104.774	107.312	96.5195	102.755	81.4017	100.837	108.541	104.068	105.407	120.558	95.3681	94.395	97.9027	91.0688	103.268	112.672	100.641	109.92	101.697	129.764	139.644	97.4432	86.3168	88.3422	99.9538	126.345	118.505	NaN
50		116.934	126.827	107.911	130.241	127.555	133.683	108.338	110.852	115.159	102.113	109.716	88.1621	107.356	114.331	109.369	112.794	127.974	99.3985	104.247	98.2401	108.783	118.446	106.483	116.552	107.168	136.227	147.241	105.16	91.8062	94.7246	105.515	131.963	124.563
60		133.088	112.069	101.614	137.644	136.96	139.925	115.022	118.188	122	108.189	116.276	121.07	115.547	120.252	135.86	104.48	111.548	104.192	114.596	123.755	114.548	145.505	157.359	96.4664	99.6244	111.967	137.786	130.348	NaN	NaN	NaN	NaN	NaN
70		94.6059	115.64	139.315	117.791	106.864	146.037	114.169	123.712	112.06	144.061	146.76	121.671	124.607	128.502	113.486	124.018	126.608	122.642	128.332	144.754	110.629	118.909	109.53	119.879	129.897	121.624	153.66	167.117	101.674	104.826	118.697	144.352	136.647
80		99.0462	121.664	145.817	122.787	112.626	154.511	151.98	154.29	128.889	131.302	135.265	119.869	131.99	133.817	129.247	136.85	151.478	116.402	127.304	127.214	136.428	129.229	161.56	177.721	106.86	110.774	125.636	151.14	143.992	NaN	NaN	NaN	NaN
90		120.714	130.423	117.577	104.485	127.872	151.412	128.486	118.812	162.765	117.963	122.797	159.982	162.442	135.949	137.986	141.304	125.658	140.086	141.403	136.285	142.943	157.033	123.146	135.263	133.675	143.055	136.599	169.143	112.349	116.675	133.438	NaN	151.11
100		127.805	138.416	109.727	134.707	157.048	136.945	124.673	170.676	135.148	145.869	128.199	NaN	171.602	143.323	NaN	146.085	132.939	148.435	148.89	142.87	NaN	NaN	130.106	NaN	139.395	148.866	145.078	NaN	118.672	123.392	140.539	NaN	157.897
110		123.063	116.094	141.446	162.228	145.106	132.512	177.334	144.723	155.217	133.72	NaN	NaN	150.661	NaN	NaN	139.852	156.883	NaN	NaN	NaN	NaN	137.429	NaN	143.974	NaN	153.592	NaN	125.208	129.689	147.39	NaN	NaN	NaN
Time (min)		Density (mg/ml)
0		249.481	253.089	251.461	288.82	303.707	296.623	242.236	269.432	272.402	246.701	284.889	242.167	266.558	273.209	236.141	266.425	273.883	291.727	273.438	290.561	251.365	278.359	273.285	268.275	246.973	285.945	294.342	272.983	237.923	235.306	257.601	276.342	266.649
10		252.51	250.808	262.677	277.703	281.23	290.133	260.074	270.884	271.978	248.327	243.339	258.719	264.606	238.475	271.09	278.267	280.833	274.174	279.056	251.7	281.704	265.502	257.275	247.708	284.315	284.951	276.204	251.738	254.511	263.731	276.445	282.587	NaN
20		285.409	248.787	250.397	259.972	268.274	274.484	282.212	254.647	266.577	270.139	251.901	245.376	256.422	239.607	269.545	273.725	271.748	272.496	271.255	248.53	279.426	265.098	255.522	252.611	281.014	281.938	271.905	248.953	250.374	265.257	271.74	282.042	NaN
30		264.261	246.556	251.239	259.591	261.411	264.784	274.182	254.674	262.821	265.924	249.635	244.733	247.955	241.594	270.364	269.85	264.533	269.163	264.48	248.774	277.053	264.13	255.653	256.772	281.604	280.664	271.221	252.474	251.289	265.989	269.704	280.618	NaN
40		280.888	260.773	242.862	253.621	257.066	258.492	262.914	270.859	245.736	263.878	261.999	249.487	243.789	242.121	242.139	264.456	261.042	266.434	261.614	246.807	275.004	260.348	252.602	259.79	276.819	283.452	271.417	249.821	246.065	263.212	268.938	278.351	NaN
50		278.548	271.417	260.19	263.46	241.914	253.965	251.876	252.97	257.722	262.88	241.214	259.654	259.766	245.845	242.337	236.807	241.538	259.566	262.028	254.895	248.226	274.845	260.599	254.75	260.428	273.819	278.892	267.431	248.463	244.197	260.43	265.658	270.789
60		264.777	257.994	262.097	259.738	242.143	250.305	246.926	251.419	254.218	256.839	237.781	243.902	239.259	232.468	242.392	257.768	255.825	248.861	248.694	273.245	259.739	272.548	274.463	248.764	244.688	256.417	263.919	267.124	NaN	NaN	NaN	NaN	NaN
70		257.425	255.622	260.266	255.224	257.822	260.24	259.36	252.278	266.768	246.849	249.859	244.033	248.822	251.155	255.501	239.723	240.745	235.703	232.146	241.421	260.149	251.714	249.678	251.068	269.503	259.357	270.628	269.866	248.751	245.902	252.525	260.659	261.949
80		254.333	252.153	255.714	251.522	257.592	258.544	250.01	246.169	245.434	251.047	254.092	258.343	236.612	243.378	233.498	234.353	243.238	260.843	252.453	251.637	267.315	258.956	267.743	257.944	248.98	251.098	249.306	258.602	262.664	NaN	NaN	NaN	NaN
90		258.78	253.806	264.349	254.026	252.377	250.221	250.429	253.057	256.546	245.258	261.577	251.085	243.245	243.122	252.975	254.418	257.782	235.922	244.469	231.145	237.092	249.111	259.365	250.6	251.688	263.534	257.6	266.929	248.554	249.201	246.211	NaN	263.299
100		257.85	249.337	251.908	249.684	249.116	253.881	253.6	256.696	256.494	248.713	257.665	NaN	241.21	241.687	NaN	258.717	255.912	237.824	244.951	230.931	NaN	NaN	254.737	NaN	255.301	260.348	256.891	NaN	247.031	248.988	244.171	NaN	262.203
110		244.884	249.518	248.857	250.721	252.702	253.531	256.98	253.018	248.377	252.3	NaN	NaN	245.272	NaN	NaN	258.597	236.884	NaN	NaN	NaN	NaN	251.51	NaN	260.372	NaN	255.214	NaN	245.379	246.089	243.232	NaN	NaN	NaN
Time (min)		Mass (pg)
0		22.7207	24.7228	19.3819	18.8615	20.69	16.0971	19.081	17.7056	22.8952	18.7407	23.2409	19.7267	19.8204	24.2894	22.2172	21.6856	26.5	18.4252	20.6524	19.6607	20.8644	27.3781	22.6267	22.5589	20.5027	25.5688	28.7391	21.4454	17.4375	17.7738	19.9585	25.5145	26.8081
10		24.871	27.3921	22.014	23.0695	23.0809	21.0434	22.0813	18.2987	23.7846	21.8607	21.4157	21.6288	24.9273	24.036	21.3193	29.0252	21.3079	22.2938	19.9654	22.4787	28.035	22.8277	23.5371	21.9725	29.1604	31.3601	22.2249	18.5786	19.1274	22.3983	28.5119	29.0303	NaN
20		27.4146	26.0481	28.8611	23.3355	24.2515	24.8577	22.8002	23.0138	19.2643	24.2609	24.0808	22.7476	23.2854	25.5715	22.7593	30.7427	22.1772	23.62	21.6249	23.4832	28.9942	23.6301	24.6001	23.1722	31.1019	33.404	23.3686	19.4784	20.0733	23.7903	30.301	30.4741	NaN
30		26.2474	27.7017	30.8066	24.8336	26.0609	26.5902	24.8038	24.463	20.1649	25.236	25.6621	24.081	24.2935	27.4037	23.8481	32.5465	23.635	24.77	22.3392	24.5655	29.7928	24.7233	26.0012	24.8207	33.9743	36.2703	24.8134	20.6334	20.9941	25.3088	32.2478	31.392	NaN
40		29.8276	26.9945	29.0561	32.3503	26.0157	27.0378	28.1467	26.043	25.2076	21.4252	26.3818	27.0211	25.3483	25.4125	29.2162	25.1696	24.6067	26.0501	23.6817	25.4984	30.9645	26.1699	27.7625	26.435	35.9207	39.619	26.3952	21.5618	21.7253	26.2683	33.9256	32.8608	NaN
50		32.4921	34.3415	28.051	34.1769	30.8182	33.9696	27.2502	28.0375	29.6225	26.7984	26.4017	22.8944	27.8195	28.0624	26.4599	26.5886	30.8976	25.8096	27.2538	24.9855	27.0077	32.5662	27.6832	29.6334	27.8864	37.2445	41.038	28.1421	22.8124	23.1267	27.4205	35.0685	33.6886
60		35.1385	28.8943	26.5694	35.6962	33.2286	34.9945	28.3503	29.6331	30.9294	27.7319	27.6155	29.5134	27.6142	27.9199	32.9102	26.9603	28.4353	25.8905	28.5179	33.8146	29.7427	39.5955	43.0848	24.0082	24.4093	28.679	36.3436	34.7928	NaN	NaN	NaN	NaN	NaN
70		24.3429	29.4897	36.1666	30.0176	27.5345	38.0273	29.5664	31.1565	29.8618	35.6448	36.6017	29.6312	30.9584	32.2466	28.9786	29.7457	30.514	28.8723	29.8829	34.921	28.7887	29.8613	27.3135	30.0907	34.9765	31.5055	41.5216	45.0073	25.2556	25.787	29.9204	37.5627	35.7889
80		25.1593	30.6589	37.233	30.8562	28.976	39.9897	38.0684	37.9059	31.6339	32.9805	34.41	30.9955	31.2161	32.6039	30.1342	32.1315	36.8682	30.3542	32.1237	32.0236	36.3879	33.4834	43.291	45.8421	26.6075	27.853	31.282	39.0273	37.8077	NaN	NaN	NaN	NaN
90		31.2153	33.035	31.0443	26.4871	32.2508	37.8724	32.1626	30.0544	41.7291	28.8915	32.0843	40.165	39.4811	33.0709	34.9519	36.0093	32.4325	33.0536	34.5844	31.4685	33.9437	39.1872	31.907	33.9434	33.6544	37.6241	35.1947	45.1724	27.9328	29.0947	32.7963	NaN	39.7728
100		32.9885	34.5145	27.6449	33.6308	39.1107	34.8256	31.6017	43.7152	34.6156	36.2707	32.9937	NaN	41.4274	34.6541	NaN	37.8565	34.0165	35.2648	36.4668	32.9869	NaN	NaN	33.086	NaN	35.6219	38.7419	37.2351	NaN	29.2865	30.6827	34.2763	NaN	41.4228
110		30.1093	28.9746	35.1979	40.6809	36.7242	33.5853	45.5178	36.4734	38.5405	33.6869	NaN	NaN	36.91	NaN	NaN	36.1036	37.1631	NaN	NaN	NaN	NaN	34.524	NaN	37.5391	NaN	39.1633	NaN	30.6993	31.8677	35.8613	NaN	NaN	NaN
cdc25-22 cells
Time (min)		Volume (µm3)
0		154.126	149.481	120.467	162.486	183.441	169.526	151.084	153.78	159.196	156.782	177.787	145.303	127.349	138.45	139.245	117.264	149.744	159.804	169.019	179.686	157.761	NaN
10		158.839	155.317	125.65	168.532	194.05	184.468	161.356	159.866	167.583	164.67	184.714	161.598	143.38	145.559	148.001	121.426	145.49	166.812	194.091	165.363	NaN	NaN
20		183.306	164.853	159.463	129.979	177.953	206.589	192.563	168.478	169.593	176.241	175.636	193.28	174.61	155.837	153.902	156.164	126.164	157.363	175.992	201.522	173.138	211.749
30		171.928	167.585	136.517	184.18	219.2	202.92	177.56	178.123	186.328	185.552	201.968	160.987	164.751	131.436	164.866	186.458	181.693	217.863	NaN	NaN	NaN	NaN
40		198.732	188.054	168.679	176.884	174.871	145.729	193.651	232.722	210.885	186.429	189.36	197.814	196.148	212.194	165.514	170.196	135.341	176.518	193.551	191.013	227.71	NaN
50		196.932	177.125	185.452	185.15	153.617	203.837	246.976	218.968	195.368	200.054	209.688	206.888	224.155	173.87	177.608	142.059	189.97	203.807	200.614	238.167	NaN	NaN
60		216.382	208.259	187.628	194.806	194.634	213.74	261.586	231.498	208.167	207.044	223.805	216.947	233.903	182.477	185.772	149.856	200.055	213.994	212.188	250.439	NaN	NaN
70		161.89	218.89	196.714	206.34	207.765	224.429	276.989	243.85	221.354	217.13	238.01	227.811	241.625	191.768	195.479	157.822	212.132	224.458	220.027	261.749	NaN	NaN
80		233.05	170.694	227.845	205.431	220.088	218.319	177.208	238.088	292.254	250.863	228.633	228.455	251.205	239.848	251.848	203.573	205.411	167.652	224.653	234.528	231.077	272.782
90		237.295	213.933	230.766	183.688	250.597	307.946	263.716	241.478	239.679	265.785	252.432	261.995	238.157	249.86	242.9	284.53	NaN	NaN	NaN	NaN	NaN	NaN
100		250.79	235.541	249.942	225.224	217.899	218.804	181.08	242.931	191.072	265.382	322.616	277.454	256.36	250.157	281.264	264.892	271.692	251.787	262.072	254.357	299.527	NaN
110		269.816	261.277	235.222	228.294	229.972	189.974	256.575	200.142	280.945	336.184	288.904	268.397	265.279	298.508	281.592	284.714	264.564	275.925	265.437	313.598	NaN	NaN
120		280.641	250.297	273.237	246.56	240.659	241.532	198.372	269.769	208.89	296.364	352.695	301.15	281.313	277.877	313.691	295.955	300.869	276.274	290.721	283.761	329.267	NaN
130		291.072	265.352	282.26	254.592	252.849	254.72	209.009	283.279	219.552	311.968	369.073	319.768	300.989	290.966	329.025	308.765	312.229	290.214	305.28	298.704	347.723	NaN
140		301.443	280.273	294.687	266.651	264.183	267.419	218.647	296.249	229.552	328.088	387.945	335.062	316.092	304.447	343.332	320.584	324.586	302.066	319.78	314.599	364.276	NaN
150		311.381	293.93	308.222	279.319	277.181	280.708	227.165	310.042	240.163	342.647	407.61	352.299	330.928	318.984	356.147	333.746	340.918	313.941	335.663	331.384	380.931	NaN
160		323.937	310.566	321.243	291.442	290.534	295.366	239.434	324.362	247.678	358.061	427.979	370.598	348.551	334.897	366.078	344.95	353.995	328.946	350.673	347.817	395.182	NaN
170		341.181	321.872	334.284	303.352	302.145	311.666	253.384	338.274	258.397	372.587	NaN	383.567	365.035	350.942	376.558	358.965	366.016	349.485	367.155	365.249	409.72	NaN
180		358.733	334.093	352.007	322.187	318.411	326.234	262.749	353.637	270.227	390.052	NaN	399.43	382.644	367.279	390.098	371.539	382.74	366.949	384.744	380.624	424.221	NaN
190		369.982	341.467	367.95	338.074	327.762	334.002	268.373	368.11	281.311	404.044	NaN	413.711	400.215	383.668	402.022	388.333	396.717	383.516	NaN	NaN	NaN	NaN
200		388.026	354.221	382.789	352.869	339.795	348.303	281.87	NaN	293.85	NaN	NaN	NaN	417.655	399.915	NaN	404.37	NaN	NaN	NaN	NaN	NaN	NaN
210		404.682	367.233	398.583	369.887	NaN	362.8	295.784	NaN	309.922	NaN	NaN	435.974	415.559	NaN	417.339	NaN	NaN	NaN	NaN	NaN	NaN	NaN
Time (min)		Density (mg/ml)
0		272.644	252.061	298.609	262.135	267.034	259.929	259.088	265.532	272.732	283.157	266.876	274.803	273.355	255.678	273.457	260.542	266.764	267.178	252.85	257.453	270.676	NaN
10		260.705	261.075	286.219	271.065	270.245	258.779	250.335	264.196	269.211	276.175	266.807	275.255	267.531	257.013	270.743	264.243	281.721	265.779	261.611	269.209	NaN	NaN
20		263.395	257.654	261.156	280.075	272.359	269.435	257.256	250.618	257.021	265.389	272.376	268.293	269.001	262.457	253.976	263.192	271.819	281.877	263.335	264.547	267.663	262.2
30		252.489	262.725	273.003	273.056	267.725	255.515	247.446	253.882	262.102	269.825	269.291	254.929	255.063	272.326	281.744	260.663	265.392	261.531	NaN	NaN	NaN	NaN
40		261.441	263.86	258.737	251.779	260.43	266.351	269.208	265.134	253.085	244.915	249.907	260.193	265.256	270.138	255.764	252.245	269.854	276.567	258.379	263.089	255.278	NaN
50		259.936	257.404	250.662	256.53	264.085	268.3	260.901	253.067	247.332	246.149	258.297	263.505	268.023	257.675	249.675	271.908	274.563	255.779	260.441	247.541	NaN	NaN
60		258.663	256.276	257.456	248.538	255.088	264.594	257.056	250.394	244.323	245.021	258.199	262.667	268.628	257.126	246.746	270.115	271.376	253.01	259.903	246.512	NaN	NaN
70		260.211	253.27	255.495	248.312	252.968	262.653	254.676	249.71	242.492	246.716	257.004	261.466	267.556	262.788	245.98	263.707	267.466	253.18	254.293	243.791	NaN	NaN
80		253.375	260.221	253.023	255.891	248.071	249.213	259.214	261.582	251.437	250.43	242.011	245.067	256.574	257.918	266.389	261.583	248.741	261.401	267.169	253.951	253.365	241.19
90		254.07	252.543	249.948	259.566	262.197	248.294	252.217	242.641	246.818	253.97	258.922	265.793	265.428	253.495	251.116	242.142	NaN	NaN	NaN	NaN	NaN	NaN
100		250.573	245.071	254.536	247.496	260.55	244.127	259.988	251.601	261.238	263.109	248.013	252.059	239.005	249.152	253.202	258.31	265.886	262.938	257.4	251.321	241.926	NaN
110		250.464	253.399	245.17	259.538	243.119	257.512	251.785	262.49	264.356	244.281	252.957	237.81	248.361	251.125	256.12	263.446	260.332	257.005	252.174	237.037	NaN	NaN
120		247.604	244.246	253.989	243.809	261.403	244.409	256.943	249.993	257.712	265.64	242.816	253.48	237.649	249.712	249.307	252.414	261.195	257.853	256.12	255.412	237.315	NaN
130		252.486	243.327	253.113	242.936	257.935	244.028	256.199	249.679	255.521	264.804	242.43	253.663	237.956	251.315	247.876	250.896	260.532	254.624	255.694	256.67	235.691	NaN
140		255.228	241.374	255.018	249.175	259.198	242.971	256.294	246.712	251.937	264.612	241.702	251.945	236.917	252.016	247.668	248.232	261.153	254.605	255.346	259.66	235.456	NaN
150		256.298	240.35	255.294	251.588	257.221	242.902	256.265	241.642	248.5	261.473	240.491	253.585	238.702	248.618	249.181	247.703	257.831	250.125	251.361	260.67	235.935	NaN
160		257.199	239.281	253.94	250.957	256.42	243.232	258.399	238.357	247.985	258.372	244.429	252.763	238.703	249.853	248.36	244.551	255.798	249.873	251.679	259.059	234.946	NaN
170		257.608	241.386	251.554	252.452	254.854	241.222	255.62	236.663	247.801	256.383	NaN	252.404	239.65	246.675	249.184	243.804	257.049	247.344	250.652	257.279	239.389	NaN
180		254.036	241.38	251.125	250.453	250.604	240.706	254.161	237.978	247.889	254.846	NaN	249.968	237.888	244.474	246.892	242.214	255.421	246.416	247.113	255.421	242.037	NaN
190		251.321	242.368	248.952	245.152	246.367	241.268	254.789	239.108	247.931	250.549	NaN	249.367	237.29	240.43	248.519	242.984	255.739	246.372	NaN	NaN	NaN	NaN
200		249.132	244.22	248.166	243.48	246.366	240.674	255.781	NaN	249.465	NaN	NaN	NaN	236.117	239.713	NaN	242.102	NaN	NaN	NaN	NaN	NaN	NaN
210		248.3	244.544	251.093	243.248	NaN	239.768	251.278	NaN	251.766	NaN	NaN	234.487	239.406	NaN	245.502	NaN	NaN	NaN	NaN	NaN	NaN	NaN
Time (min)		Mass (pg)
0		42.0216	37.6785	35.9726	42.5932	48.985	44.0649	39.144	40.8335	43.4177	44.3939	47.447	39.9298	34.8115	35.3986	38.0774	30.5523	39.9464	42.696	42.7365	46.2605	42.7022	NaN
10		41.3693	40.5723	35.8758	45.6998	52.4495	47.7252	40.3371	42.2386	45.0835	45.4351	49.2943	44.4744	38.2907	37.4125	40.0275	32.0855	40.9522	44.3295	50.8076	44.508	NaN	NaN
20		48.3348	42.4212	41.6574	36.3213	48.4819	55.637	49.507	42.185	43.4784	46.7071	47.7527	51.8768	46.8346	40.7646	39.046	40.9762	34.3583	44.3404	46.3007	53.3597	46.3289	55.4508
30		43.3715	44.0027	37.1904	50.2493	58.5832	51.8138	43.9149	45.1269	48.7691	50.034	54.4163	41.0232	41.8435	35.8046	46.3169	48.5301	48.1892	56.9091	NaN	NaN	NaN	NaN
40		51.9746	49.4365	43.5623	44.529	45.4661	38.7768	52.0992	61.6117	53.3248	45.6124	47.2319	51.466	51.9804	57.2611	42.3358	42.8678	36.5134	48.7028	49.9541	50.2159	57.9098	NaN
50		51.0893	45.6089	46.437	47.4148	40.4844	54.621	64.2848	55.3993	48.2892	49.223	54.1391	54.4643	60.0213	44.8507	44.2976	38.6025	52.1064	52.0807	52.1946	58.733	NaN	NaN
60		55.7227	53.3268	48.3192	48.3779	49.5491	56.5168	67.1755	57.9276	50.8344	50.7284	57.7584	56.9402	62.8279	46.9091	45.7887	40.4411	54.2285	54.1145	55.0443	61.7008	NaN	NaN
70		42.0253	55.4083	50.2127	51.195	52.54	58.905	70.471	60.8579	53.6371	53.5823	61.1508	59.5438	64.6329	50.427	48.0209	41.6351	56.7191	56.8282	55.9135	63.6983	NaN	NaN
80		58.8754	44.4481	57.6317	52.5161	54.526	54.3711	45.9758	62.2526	73.371	62.804	55.2957	55.9944	64.4144	61.8528	67.0943	53.2207	50.9733	43.7766	59.9769	59.5866	58.5414	65.8332
90		60.2576	53.8985	57.6883	47.7341	65.7297	76.3999	66.5023	58.5225	59.1826	67.4677	65.3314	69.5895	63.1283	63.3531	60.9854	68.8678	NaN	NaN	NaN	NaN	NaN	NaN
100		62.7469	57.7061	63.6631	55.6559	56.7413	53.3989	46.9454	61.1609	49.9695	69.891	79.9489	69.9857	61.2425	62.406	71.1502	68.3889	72.1812	66.1736	67.5528	63.9559	72.307	NaN
110		67.567	66.2133	57.6278	59.2575	55.9112	48.8608	64.6296	52.4851	74.3415	82.0719	73.0698	63.7723	65.87	74.8859	72.0573	75.0029	68.8105	70.8972	67.029	74.2677	NaN	NaN
120		69.5494	61.077	69.3718	60.0391	62.8419	59.0449	50.9723	67.4547	53.7908	78.7649	85.6211	76.2909	66.7973	69.443	78.1393	74.6137	78.5083	71.1645	74.4045	72.5557	78.0064	NaN
130		73.5525	64.5203	71.4084	61.87	65.2295	62.1475	53.5632	70.6148	56.0203	82.5418	89.4332	81.0994	71.6377	73.1157	81.5324	77.3486	81.3123	73.8213	78.0133	76.7772	81.9564	NaN
140		76.996	67.6164	75.1817	66.5766	68.4788	64.9671	56.0104	72.961	57.7439	86.7818	93.7463	84.3821	74.9178	76.7351	85.0235	79.5103	84.74	76.8876	81.54	81.7409	85.796	NaN
150		79.832	70.636	78.8158	70.3675	71.2279	68.1514	58.1391	74.7973	59.6326	89.5129	98.0641	89.4408	79.0567	79.2962	88.7953	82.6988	87.8028	78.48	84.3865	86.3937	89.88	NaN
160		83.3495	74.2815	81.5696	73.1443	74.4624	71.8128	61.8954	77.2328	61.4071	92.4211	104.713	93.6562	83.1767	83.5758	90.9303	84.3209	90.4753	82.1664	88.2323	90.041	92.8216	NaN
170		87.7779	77.7078	83.9821	76.4882	76.9586	75.165	64.782	80.0271	64.0468	95.4844	NaN	96.7741	87.4657	86.4962	93.8346	87.4319	93.9938	86.3219	91.9687	93.8769	98.1641	NaN
180		90.9816	80.6645	88.2402	80.5233	79.6212	78.4998	66.7758	84.2169	66.9981	99.3	NaN	99.7869	90.9942	89.6931	96.2164	89.8875	97.7155	90.2835	94.9659	97.1323	102.81	NaN
190		92.9012	82.7589	91.5739	82.8189	80.6341	80.5621	68.3623	88.1387	69.7183	101.179	NaN	103.056	94.8785	92.1788	99.8728	94.3419	101.524	94.5584	NaN	NaN	NaN	NaN
200		96.5652	86.549	95.1493	85.9125	83.6181	83.7817	72.0588	NaN	73.3063	NaN	NaN	NaN	98.6088	95.7819	NaN	98.0293	NaN	NaN	NaN	NaN	NaN	NaN
210		100.512	89.749	100.225	89.9453	NaN	86.962	74.3136	NaN	78.1125	NaN	NaN	102.112	99.5001	NaN	102.578	NaN	NaN	NaN	NaN	NaN	NaN	NaN
