# Supplementary material for: Variations of intracellular density during the cell cycle arise from tip-growth regulation in fission yeast
Source: eLife. 2021 Jun 8;10:e64901. doi: 10.7554/eLife.64901 (PMC8221806; doi:10.7554/eLife.64901)
Supplement: Figure 4—source data 1. [file elife-64901-fig4-data1.xlsx]

## Sheet: Fig4_cut7_cdc16
WT
Time (min)		Volume (µm3)
0		162.7	168.028	143.236	132.212	155.504	184.477	186.107	176.229	158.228	142.312	155.201	148.548	154.35	154.397	149.811	157.96	146.634	167.759	144.852	163.391
5		161.562	171.739	145.585	138.31	165.308	188.777	188.105	165.751	146.15	154.283	154.197	150.708	153.447	155.175	159.306	163.903	149.949	174.29	147.368	162.293
10		164.424	173.379	148.194	140.549	164.007	184.355	185.448	166.982	144.155	158.785	152.221	149.525	154.443	155.655	161.005	163.523	152.998	169.768	146.456	164.114
15		163.92	167.73	145.551	143.227	165.407	NaN	NaN	169.026	NaN	151.165	NaN	NaN	159.224	164.942	NaN	162.82	154.105	171.5	NaN	161.127
Time (min)		Density (mg/ml)
0		260.372	286.691	269.893	264.287	271.49	279.9	270.111	255.142	270.944	262.702	239.975	246.203	263.15	277.613	258.176	257.926	257.652	260.69	259.414	268.079
5		260.14	290.123	265.96	261.082	266.483	296.092	265.693	269.081	270.676	272.881	240.779	250.296	263.224	276.42	256.861	261.549	255.732	268.633	255.98	267.272
10		271.055	293.363	267.043	259.22	273.043	288.675	274.396	279.505	276.762	249.513	251.118	255.54	278.523	287.782	261.526	257.542	268.15	273.063	259.976	278.552
15		284.264	311.063	278.472	269.929	277.466	NaN	NaN	285.913	NaN	276.807	NaN	NaN	252.072	273.931	NaN	266.543	279.832	278.519	NaN	287.494
Time (min)		Mass (pg)
0		42.3625	48.1722	38.6583	34.9419	42.2178	51.6352	50.2695	44.9635	42.8709	37.3857	37.2443	36.5729	40.6174	42.8627	38.6778	40.742	37.7804	43.733	37.5766	43.8016
5		42.0288	49.8254	38.7199	36.1104	44.0517	55.8953	49.9781	44.6004	39.5594	42.101	37.1274	37.7216	40.3909	42.8935	40.9194	42.8688	38.3466	46.8201	37.7232	43.3765
10		44.568	50.8629	39.5741	36.433	44.781	53.2188	50.8862	46.6721	39.8967	39.6188	38.2255	38.2096	43.0158	44.7947	42.1068	42.1141	41.0265	46.3574	38.075	45.7144
15		46.5967	52.1748	40.532	38.6612	45.8949	NaN	NaN	48.3267	NaN	41.8434	NaN	NaN	40.1359	45.1827	NaN	43.3987	43.1234	47.7659	NaN	46.323
cut7
Time (min)		Volume (µm3)
0		179.108	254.062	162.293	171.621	168.976	164.302	191.974	202.679	176.966	201.765	170.932	182.946	210.821	177.055	168.042	190.044	170.593	181.705	182.371	184.118	177.273	197.158	189.788
5		180.325	255.723	167.514	174.405	155.712	169.474	200.856	207.191	176.473	199.927	172.049	184.588	207.851	179.868	170.616	193.858	171.083	186.81	187.107	188.13	180.972	199.638	189.863
10		185.722	263.03	167.467	178.715	159.988	172.842	204.838	208.026	176.628	203.856	176.419	188.193	213.239	180.567	176.595	198.456	177.158	185.634	191.108	188.736	182.622	200.234	196.789
15		188.321	266.43	171.973	181.775	160.818	181.453	195.049	213.502	179.673	207.982	178.095	190.045	225.459	183.285	176.002	202.914	181.173	189.955	190.014	191.784	183.889	204.624	199.711
20		189.057	268.396	173.169	181.503	164.336	183.385	191.969	213.135	178.376	211.754	179.293	188.146	222.823	186.12	179.474	202.413	179.094	192.025	193.963	181.092	183.572	207.092	199.053
25		192.223	274.253	175.926	184.309	167.17	193.838	195.138	214.489	183.177	210.067	181.102	188.507	216.696	188.929	177.704	197.761	NaN	194.588	195.993	191.788	NaN	208.52	201.462
30		192.7	274.974	175.384	182.577	177.749	173.974	NaN	NaN	182.735	204.568	180.924	NaN	227.221	193.63	179.037	NaN	NaN	196.323	199.069	NaN	NaN	213.354	202.92
Time (min)		Density (mg/ml)
0		276.587	268.62	266.208	294.647	264.452	271.293	277.598	288.203	284.344	293.845	247.001	271.612	282.271	264.107	270.576	266.74	263.964	264.343	254.632	272.105	255.329	263.469	255.471
5		266.069	263.888	282.533	281.391	266.468	280.262	284.154	289.829	289.121	288.616	251.497	266.787	288.279	267.762	280.352	270.086	278.103	279.964	254.268	275.642	260.728	257.832	260.98
10		271.167	271.471	274.067	289.957	278.285	279.158	280.304	298.412	281.378	293.547	243.267	278.091	286.517	275.288	285.832	267.743	272.127	266.638	253.901	273.399	266.089	278.972	254.995
15		276.868	267.765	282.654	285.446	277.353	297.126	299.211	306.611	292.175	298.041	251.827	286.39	294.183	276.263	283.039	272.912	286.168	264.854	249.117	274.593	256.031	265.056	257.571
20		275.009	274.408	273.124	289.042	282.983	301.395	307.842	303.969	282.747	292.019	250.186	281.354	301.371	277.244	293.501	285.14	281.226	277.655	248.589	294.685	264.478	274.149	264.04
25		281.566	283.764	288.46	301.364	292.605	293.689	324.767	315.693	304.694	297.827	252.428	297.178	293.057	283.885	296.952	284.188	NaN	279.093	261.525	286.703	NaN	276.724	274.313
30		282.888	283.983	277.767	293.698	289.756	298.561	NaN	NaN	305.181	310.613	267.169	NaN	300.86	292.257	304.707	NaN	NaN	279.959	271.402	NaN	NaN	285.239	267.43
Time (min)		Mass (pg)
0		49.539	68.2459	43.2036	50.5677	44.686	44.5742	53.2916	58.4126	50.319	59.2877	42.2205	49.6902	59.5086	46.7614	45.4682	50.6924	45.0302	48.0324	46.4374	50.0993	45.263	51.9448	48.4854
5		47.979	67.4822	47.3283	49.076	41.4924	47.4971	57.074	60.05	51.022	57.7023	43.2699	49.2458	59.919	48.162	47.8326	52.3584	47.5788	52.3	47.5754	51.8565	47.1844	51.4731	49.5505
10		50.3615	71.4051	45.8973	51.8197	44.5223	48.2503	57.4171	62.0775	49.6992	59.8412	42.9169	52.3347	61.0965	49.708	50.4763	53.1353	48.2095	49.4971	48.5225	51.6001	48.5936	55.8596	50.1803
15		52.14	71.3406	48.6087	51.8869	44.6035	53.9143	58.3606	65.4619	52.496	61.9873	44.849	54.4268	66.326	50.6349	49.8155	55.3776	51.846	50.3103	47.3357	52.6625	47.0812	54.2369	51.4397
20		51.9923	73.6499	47.2966	52.462	46.5042	55.2715	59.0961	64.7863	50.4354	61.8362	44.8567	52.9357	67.1523	51.6007	52.6758	57.716	50.366	53.3167	48.217	53.3649	48.5508	56.7741	52.5578
25		54.1234	77.8232	50.7477	55.5439	48.9147	56.9281	63.3744	67.7127	55.8129	62.5636	45.7153	56.0202	63.5043	53.6341	52.7695	56.2013	NaN	54.3081	51.2571	54.9863	NaN	57.7025	55.2636
30		54.5124	78.0881	48.7159	53.6225	51.504	51.9417	NaN	NaN	55.7672	63.5416	48.3375	NaN	68.3618	56.5897	54.554	NaN	NaN	54.9624	54.0278	NaN	NaN	60.8567	54.267
WT
Time (min)		Volume (µm3)
0		172.913	207.896	141.388	175.096	155.316	152.513	169.912	178.916	178.891	158.869	168.188	193.347	172.378	171.18	174.699	177.646	169.792	177.268	179.522	170.066	165.348	167.632	213.248	161.678	175.276	161.328	144.992	151.438	169.611	167.373	187.852	175.984	164.727	182.572	185.166	189.589	180.759	169.804	163.788	167.261	192.841	180.942	190.019	179.614	180.885	201.118	184.05	193.704
10		163.521	212.732	142.886	179.914	163.348	158.623	159.375	187.314	180.192	163.235	178.908	201.13	174.929	171.686	181.473	189.648	175.972	185.058	187.129	168.921	166.225	171.82	210.327	162.255	180.047	166.482	146.115	151.271	172.903	170.568	194.211	184.428	166.333	188.034	189.646	185.475	189.01	175.793	165.207	167.774	192.786	187.246	198.429	182.927	171.611	199.193	190.653	193.715
20		NaN	NaN	NaN	NaN	NaN	NaN	NaN	NaN	NaN	NaN	NaN	NaN	NaN	NaN	NaN	NaN	NaN	NaN	196.095	NaN	NaN	NaN	NaN	NaN	NaN	NaN	NaN	NaN	NaN	NaN	NaN	NaN	NaN	NaN	NaN	NaN	NaN	NaN	NaN	NaN	NaN	NaN	NaN	NaN	NaN	NaN	NaN	NaN
20		231.616	189.8	152.2	165.4	192.9	160.4	191.1	173.2	202.8	188.7	201.6	205.1	193.8	184.1	197.5	193.7	207.3	199.3	199.7	243.2	172.3	181.8	190.4	161.6	163.2	185.9	187.2	212.1	206.1	192.2	175	183.4	210.4	217.9	193.3	176.1	186.1	208.7	185.3	185.5	182.8	208.3	205	217.7	172.8	176.1	199.2	228
30		239.611	201.3	171	183.1	205.8	180	208	186	212.7	199.8	215.7	225.8	193.4	199.2	201.4	206.3	219.3	217.4	209	255.3	184.8	191.3	207	176.4	178.2	201.4	205.9	231.2	221.2	204.6	189.5	203.2	219.6	231	209	185.1	196.4	216.3	215.5	202.7	204	NaN	209.3	236.5	193	197.6	211.8	241.3
40		255.445	211.5	179.1	198.2	220.7	194.6	222.7	203.3	229.8	216	224	237	208.3	212.6	209.6	219.8	230.8	233.3	218.7	268.1	193	206.7	222.3	192.5	192.5	216.4	224.5	243.3	233.3	212	201.4	218.4	230.7	242.3	217.3	195.8	NaN	233.6	232.5	219.8	223.5	NaN	221.8	251.4	206.8	212.8	220.2	249.6
50		269.416	222.2	193.7	214.2	234.6	210.8	238.3	216.7	248.9	230.7	237.1	250.5	219.3	224	NaN	233.6	243.6	251	231.6	279.5	202.9	221.3	236.1	208	206.1	230.6	239.9	259.5	246.7	223.6	217.9	237.1	241.4	256.9	231	208.2	NaN	249.4	251.6	237	NaN	NaN	235.7	268.3	214.1	221.7	NaN	NaN
60		281.849	235.5	207	225	251.8	225.6	249.2	233	268.8	249	250.3	264	233.3	NaN	NaN	248.2	257	266.4	243.3	296.2	210.8	236.2	NaN	217.9	213	244.2	254.8	276.3	259.6	235.8	230.4	248.9	256.5	272.3	244.2	NaN	NaN	269.6	261.7	NaN	NaN	NaN	251.9	286.2	NaN	NaN	NaN	NaN
70		301.877	248.3	221.6	237.2	263.6	243.3	263.9	240.1	289.7	260.7	265.2	275.6	253.3	NaN	NaN	262.9	272.6	282.7	256.7	305.2	221.8	NaN	NaN	231.7	225.1	260.1	270.5	292.3	274.2	249	243.9	261.8	270.3	288.4	259.3	NaN	NaN	281.7	276.8	NaN	NaN	NaN	267.3	300.7	NaN	NaN	NaN	NaN
80		314.59	263.7	239.8	250.3	278.5	261	266.8	NaN	312.6	278.8	280.2	289.7	264.6	NaN	NaN	279.7	287.1	300.3	267.5	317.7	NaN	NaN	NaN	242.6	235.4	275.4	282.8	312.9	289.9	266.9	257.5	274.1	286.2	301.9	279.8	NaN	NaN	298.8	293.1	NaN	NaN	NaN	284.8	314	NaN	NaN	NaN	NaN
90		331.661	279.4	253.5	263	297.4	275.2	NaN	NaN	323.6	295.5	301.1	309.9	276.8	NaN	NaN	292.8	301.8	314.9	287.5	332.5	NaN	NaN	NaN	257	247.3	293.7	299	334.5	NaN	277.3	271.4	286.6	301	317.5	294.4	NaN	NaN	315.6	311.1	NaN	NaN	NaN	304.4	325.1	NaN	NaN	NaN	NaN
100		351.371	293.8	269.6	277.5	311.9	291.9	NaN	NaN	338.5	313.3	313.3	322.7	289.9	NaN	NaN	308.4	315.9	330.2	298.5	346.4	NaN	NaN	NaN	273.5	263.8	315.1	313.4	NaN	NaN	295	282.1	297	316.6	329.3	307.5	NaN	NaN	330.5	327.6	NaN	NaN	NaN	318.8	332.5	NaN	NaN	NaN	NaN
Time (min)		Density (mg/ml)
0		274.784	293.339	302.725	232.346	261.43	277.717	259.617	291.135	336.686	333.887	322.398	298.251	267.277	290.233	295.891	289.531	306.221	287.418	272.471	289.446	283.839	302.553	286.089	260.371	288.619	308.5	357.933	324.321	297.717	285.606	291.705	297.987	303.452	289.401	288.038	291.327	298.871	282.326	298.957	295.292	278.221	277.134	276.148	294.089	276.807	292.464	287.484	323.553
10		284.307	303.155	327.887	251.34	276.564	307.569	271.953	309.106	316.926	335.85	323.467	330.243	285.282	298.643	325.332	302.425	303.058	301.322	278.015	302.481	292.948	289.212	298.375	303.106	253.796	292.673	373.5	348.921	318.065	308.311	329.758	306.951	326.827	302.573	296.591	307.439	315.126	290.328	325.239	299.195	283.701	287.806	276.846	307.985	285.418	316.279	304.841	307.102
20		NaN	NaN	NaN	NaN	NaN	NaN	NaN	NaN	NaN	NaN	NaN	NaN	NaN	NaN	NaN	NaN	NaN	NaN	283.551	NaN	NaN	NaN	NaN	NaN	NaN	NaN	NaN	NaN	NaN	NaN	NaN	NaN	NaN	NaN	NaN	NaN	NaN	NaN	NaN	NaN	NaN	NaN	NaN	NaN	NaN	NaN	NaN	NaN
20		261.12	272.4	306.1	285	260.3	261.3	280.1	248.2	307.8	307.1	290.6	301.9	276.8	298.5	278.1	293.7	279.9	273	283.7	287.6	299	231.7	279.1	340.6	322.2	299.4	278.9	299.7	294.3	285.9	281.3	283.3	291.1	285.6	262.4	277.1	277.5	284.4	268.9	290	267	271.8	285.3	303.8	279.8	284.4	304.2	290
30		279.007	281.2	273.7	297.8	259.9	280.2	297.5	261.4	302.6	303.9	288.3	308.3	273.3	291.3	283.8	289.2	295.4	279.4	286.7	309.7	259.5	272.8	267.7	313.6	295.1	295	277.8	296.1	280.7	281.6	286.6	279	296.8	290	276.7	290.5	269.6	276.7	276.7	280.4	269	NaN	292.4	296.3	280.8	283.4	295.7	291.6
40		282.62	284.4	259.6	302.2	256.8	262.9	295	272.1	301.8	315.2	288.2	319.5	272.8	289.8	285.1	284.8	274.8	267.3	292.6	276.1	293.6	264.9	277.3	305	300.3	285.7	284.6	292.1	302.6	287.6	292.6	283.3	298.1	291	279.2	279.4	NaN	281.3	271.6	283.3	275.6	NaN	301.1	303.4	275.8	267.5	302.4	295.7
50		285.012	259.4	266.7	296.2	250.2	266.3	285.8	270.7	293.6	301.5	285.5	301.3	268.7	283.1	NaN	279.5	283.3	269.4	285	251	285	275.7	277.1	289.6	296.7	287.4	268.9	292.8	287.3	279.4	297.1	281	285.9	291.5	270.6	283.6	NaN	274.8	276.7	289.8	NaN	NaN	297.7	292.5	286.1	274.5	NaN	NaN
60		268.128	274.6	247.5	296.2	244.7	257.5	283.3	267.9	276.6	296.5	272.4	281.2	268.4	NaN	NaN	271.5	274	257.9	291.8	294.8	287.4	285	NaN	286.9	282.2	279.5	274.3	289.7	277.1	273.5	275.2	276.1	284.9	290.2	271.5	NaN	NaN	271	266.5	NaN	NaN	NaN	292.3	292.7	NaN	NaN	NaN	NaN
70		274.582	267.1	246.6	292.6	250.2	254.1	287.9	266.1	275.9	294.9	267.1	289.2	258.5	NaN	NaN	271.1	282.3	251.4	268.6	282.8	285.1	NaN	NaN	275.3	269.9	282.4	271.4	291.9	274	262.6	253	254.4	282.5	290.2	263.7	NaN	NaN	271	274.8	NaN	NaN	NaN	295.5	300.8	NaN	NaN	NaN	NaN
80		255.912	273.6	240	282.3	251.1	258.7	286.1	NaN	277.3	292.6	260.5	271.7	247.3	NaN	NaN	271.8	271.4	259.2	245.3	278.4	NaN	NaN	NaN	284.5	275.5	271.1	264.9	282.1	288.2	277	270.8	260.4	274.8	283.6	251.3	NaN	NaN	264.7	273.2	NaN	NaN	NaN	280.4	287.3	NaN	NaN	NaN	NaN
90		267.705	273.5	240.6	279.8	255.1	263	NaN	NaN	271.9	273.7	266	270.3	251.8	NaN	NaN	270.6	266.5	251.3	278.1	306.6	NaN	NaN	NaN	275.4	276.7	267.9	270.7	296.2	NaN	264.5	272.9	263.1	279.9	295.3	250.9	NaN	NaN	274.6	260.6	NaN	NaN	NaN	280.2	293.8	NaN	NaN	NaN	NaN
100		268.116	268.8	244.7	277.3	263.9	262.1	NaN	NaN	275.5	280.4	260.2	268.9	262.9	NaN	NaN	250.4	278	251.6	268.1	289.9	NaN	NaN	NaN	284.7	276.4	280.7	279	NaN	NaN	245.1	270.6	262.9	281.5	294.8	250.5	NaN	NaN	257.8	262	NaN	NaN	NaN	287.8	306.5	NaN	NaN	NaN	NaN
Time (min)		Mass (pg)
0		46.2492	60.9487	43.558	41.7124	40.3058	43.5724	44.748	52.4764	58.1521	52.0241	52.7277	59.1584	47.1542	50.0482	52.7332	52.4578	50.9361	51.277	48.3234	49.7688	47.1775	48.5988	60.3706	43.9681	46.5168	46.6111	51.9978	48.1279	50.7922	47.9241	57.0203	52.0683	51.0295	50.6942	51.3254	55.7921	55.001	47.3759	49.8376	49.5383	53.7544	49.8742	52.4217	52.7321	49.7959	59.4088	52.1664	60.1005
10		46.4901	64.4908	46.8503	45.2197	45.1763	48.7876	43.3427	57.8998	57.1076	54.8224	57.8709	66.4217	49.9042	51.2728	59.0392	57.3544	53.3298	55.7619	52.0519	51.0952	48.6951	49.6923	62.7562	49.1804	45.6951	48.7249	54.5738	52.7817	54.9944	52.5879	64.0426	56.6102	54.3622	56.8941	56.2473	57.022	59.5619	51.0377	53.7318	50.1972	54.6935	53.8904	54.9343	56.3386	48.9808	63.0007	58.1189	59.4903
20		NaN	NaN	NaN	NaN	NaN	NaN	NaN	NaN	NaN	NaN	NaN	NaN	NaN	NaN	NaN	NaN	NaN	NaN	55.603	NaN	NaN	NaN	NaN	NaN	NaN	NaN	NaN	NaN	NaN	NaN	NaN	NaN	NaN	NaN	NaN	NaN	NaN	NaN	NaN	NaN	NaN	NaN	NaN	NaN	NaN	NaN	NaN	NaN
20		60.9533	51.7	46.6	47.2	50.2	42.1	53.8	43.4	62.8	57.8	58.7	61.8	53.9	55.1	54.8	56.9	58	54.5	56.7	70	51.6	42.2	53.1	55	52.6	56.2	52.2	63.6	60.7	55	49.3	51.9	61.6	62.1	50.7	48.9	51.8	59.8	49.9	53.8	48.9	56.6	58.7	66.5	48.5	50.2	60.6	66.1
30		66.0844	56.3	47.5	54.2	53.3	48.4	60.9	48.7	64.9	61.6	62.5	70	53.1	58.5	56.8	59.7	62.1	59.4	60.2	74.3	52.4	49.2	56.9	56.2	54.4	59.4	57.8	68.4	64.8	58.3	54.4	57.2	65.2	66.6	57.1	52.4	53	61.1	58.8	57.7	55.5	NaN	61.6	71.6	53.9	55	63.7	70.6
40		70.659	58.1	48.2	58.8	56	51.7	64.4	54	68.2	65.7	64	71.6	56.7	61.3	59.7	62.3	64.9	62.8	63	76	55	55.3	61	58.7	57.5	62.8	62.1	71.5	67.3	59.6	57.7	61.1	67.5	70.1	59.2	55.8	NaN	65.1	63.4	62.7	61.9	NaN	65.3	75.1	58.2	58.6	66.5	73.8
50		75.1113	60.8	50	63.7	59.1	55.5	69.2	58.1	72.3	69.5	66.5	75	58.8	63.4	NaN	65.1	68.6	66.3	65.9	79	57.3	61.1	65.4	60.9	59.4	66.2	66	75.9	70.2	61.8	60.9	64.8	70.2	74.6	62.8	59	NaN	68.8	68.8	68.8	NaN	NaN	69.8	79.9	61.4	60.9	NaN	NaN
60		77.1179	64.1	52	66.2	63.1	58.5	71.8	62.5	76.8	74.5	68.8	77	61.2	NaN	NaN	68.3	71.2	69.4	66.9	82.1	60.2	67.4	NaN	62.6	60.6	68.9	69.4	80	74.2	65	63.7	67.1	73.4	78.6	65.1	NaN	NaN	73.7	71.4	NaN	NaN	NaN	73.8	84.7	NaN	NaN	NaN	NaN
70		81.8313	67.1	54.8	68.7	66	63.2	75.6	63.9	81.3	75.9	71.7	77.7	65.4	NaN	NaN	71.6	75	72.8	70	86.5	63.3	NaN	NaN	65.3	63	72.4	73	84.9	76.8	67.5	66.6	69.7	76.4	83.6	67.6	NaN	NaN	76.7	74.8	NaN	NaN	NaN	77.2	88.4	NaN	NaN	NaN	NaN
80		84.3541	71.7	58.4	71.5	70.6	67.7	76.5	NaN	86.8	80.1	74.4	79.8	68.2	NaN	NaN	74.5	78.8	76.3	72.2	92.3	NaN	NaN	NaN	68.3	65	76.4	76.9	90.8	83.6	70.5	69.1	72.1	80.7	87.8	71.9	NaN	NaN	80.2	78.3	NaN	NaN	NaN	81.8	93.1	NaN	NaN	NaN	NaN
90		89.0695	76	61.7	73.6	76.3	71.8	NaN	NaN	90.4	83.2	79.3	84.8	71	NaN	NaN	77.4	83.4	81	76.5	96.9	NaN	NaN	NaN	72.5	68.1	80.7	81.3	99.1	NaN	72.6	72.9	75	84.4	93.6	74.3	NaN	NaN	84.5	83.1	NaN	NaN	NaN	86.8	97.9	NaN	NaN	NaN	NaN
100		94.9534	79	65.7	76.2	81.6	76.9	NaN	NaN	96.2	86.7	83	87.6	74.8	NaN	NaN	81.7	87.6	85.4	78.6	100.4	NaN	NaN	NaN	76.5	72.2	88.9	87.4	NaN	NaN	76.9	76.9	78.5	88.4	98.8	77.9	NaN	NaN	88.5	88	NaN	NaN	NaN	90.4	101.6	NaN	NaN	NaN	NaN
cdc16
Time (min)		Density (mg/ml)
0		238.384	201.772	209.925	205.397	264.292	238.341	232.548	242.693	234.981	232.198	266.517	238.98	226.793	230.608	246.953	225.835	311.709	237.34
10		239.703	212.596	205.415	216.007	272.135	254.226	245.921	249.898	243.81	241.782	265.502	224.844	239.751	249.57	240.459	226.467	328.272	225.953
20		267.798	218.563	216.993	262.695	286.021	262.089	239.48	256.711	250.353	250.029	289.192	231.505	238.372	268.565	236.748	258.629	334.82	224.209
30		254.392	266.199	233.01	245.611	285.662	262.386	243.275	262.236	253.356	249.205	270.768	233.492	248.725	251.369	252.803	252.247	328.407	239.971
40		250.365	242.275	237.355	238.22	283.321	264.044	251.154	260.367	263.149	248.947	299.292	244.234	257.966	262.962	231.518	246.496	328.661	225.41
50		263.82	243.149	263.244	252.779	293.608	273.517	254.307	259.323	268.109	257.247	299.216	252.826	276.441	269.362	215.43	255.919	342.727	245.032
60		276.687	259.497	255.296	254.186	307.983	283.568	265.668	267.785	270.188	265.563	309.162	265.244	269.534	279.381	275.053	260.329	328.195	257.357
70		275.567	260.204	256.884	259.643	306.563	291.297	279.927	271.353	284.194	270.608	286.309	254.691	270.245	271.278	266.164	266.962	327.694	254.808
80		293.347	275.988	260.332	283.7	321.545	294.951	258.225	274.215	300.612	280.105	283.055	275.629	275.26	288.437	285.274	287.004	326.174	263.972
90		292.781	290.372	269.154	283.125	321.916	305.169	279.64	291.557	273.812	295.241	321.493	280.411	265.586	294.792	295.374	286.889	324.171	276.316
100		303.59	287.256	281.83	281.174	315.071	291.777	292.765	315.693	296.624	280.669	332.226	293.091	287.306	306.06	306.105	293.243	314.764	262.982
Time (min)		Volume (µm3)
0		182.237	173.497	157.194	150.895	154.873	178.769	197.737	190.199	172.923	194.462	196.666	193.067	195.989	186.106	201.219	176.143	165.206	194.563
10		180.182	173.289	154.044	156.173	162.56	175.01	197.536	191.376	175.025	193.642	198.724	194.738	198.156	188.546	207.579	179.091	166.232	202.551
20		184.362	182.283	156.342	161.676	170.777	178.226	207.027	198.29	181.684	196.844	204.559	200.691	205.379	194.75	218.064	182.963	169.806	210.615
30		188.416	189.072	160.356	167.631	179.358	182.94	214.286	204.378	189.422	201.975	211.18	206.256	210.339	200.388	227.169	188.169	172.92	217.921
40		194.009	198.426	165.596	173.435	186.338	190.058	224.304	212.912	197.244	209.902	213.871	211.099	216.403	207.185	232.925	194.912	178.48	223.177
50		200.603	207.505	171.83	177.39	193.496	196.745	230.972	222.019	204.252	217.347	222.381	217.775	221.829	214.167	241.378	200.909	185.921	229.518
60		206.75	214.373	178.119	184.133	200.585	203.778	237.526	230.381	209.962	225.866	228.83	224.29	228.516	219.735	245.573	206.115	194.362	235.652
70		213.192	221.822	185.044	192.53	204.937	209.376	244.19	236.469	213.372	233.578	232.74	230.281	233.151	225.695	248.783	215.902	201.575	241.413
80		217.84	232.527	191.266	201.237	211.324	212.778	250.006	242.53	216.786	239.338	234.214	236.319	238.743	231.81	252.85	225.735	209.165	247.94
90		222.522	242.653	198.812	211.604	221.537	216.693	253.622	246.986	221.786	245.058	239.235	244.407	244.23	239.442	264.039	235.336	213.692	258.105
100		227.023	255.767	207.85	224.192	226.211	221.019	260.834	252.402	224.29	252.297	242.028	250.806	254.159	246.316	268.797	249.482	217.817	265.451
Time (min)		Mass (pg)
0		43.4424	35.0069	32.9989	30.9934	40.9316	42.6079	45.9834	46.16	40.6336	45.1535	52.4149	46.1392	44.449	42.9176	49.6917	39.7793	51.4962	46.1775
10		44.7846	36.561	32.4739	35.7718	44.6189	44.0038	47.26	47.8059	42.5511	46.7395	54.3807	45.131	46.568	47.0852	50.084	42.4879	54.0187	46.3836
20		46.1121	41.8354	34.5189	37.9017	47.6043	45.6762	50.2442	50.4909	45.3435	48.1335	56.9384	47.1157	49.8559	49.2471	52.6695	44.3225	55.4311	48.5551
30		48.1086	44.9219	37.2518	40.8371	51.032	48.2233	52.9509	52.7023	48.564	50.4279	60.2056	49.0573	53.1731	52.2084	53.3623	46.7145	57.5232	50.6446
40		50.9839	48.964	40.0946	43.4762	54.3512	51.2479	56.3682	55.6707	51.5984	53.434	62.8095	51.9172	55.9683	55.2343	56.3751	49.6732	59.3453	53.2738
50		53.0789	52.7772	42.9253	44.4022	57.2426	54.217	59.8806	58.7071	54.7917	56.2595	65.1326	54.5272	58.7325	57.2317	59.8892	51.5798	61.5476	56.1739
60		56.3364	55.0516	45.4189	47.5857	60.7839	57.4545	62.2186	61.4869	58.2575	59.8561	67.4866	58.055	61.7079	60.3327	62.5632	54.3861	64.2253	58.8557
70		59.8733	59.1191	48.3184	51.5178	63.6542	60.7053	65.3733	64.5973	59.6141	64.0537	69.6827	61.2813	63.2722	63.4041	66.578	58.7191	66.4004	62.7288
80		62.8953	64.0241	50.731	54.992	66.5158	62.4368	68.8763	68.998	61.8334	66.7014	71.6893	64.8298	65.3585	66.8483	72.2975	63.1115	67.7787	65.275
90		66.2503	68.4186	54.2867	59.1223	69.6925	65.1516	72.2394	71.6573	64.6978	70.1644	74.9328	68.5618	68.2577	69.9073	75.8011	67.4572	69.4886	68.973
100		69.774	74.5276	58.3598	63.5701	71.7267	68.4913	76.4259	74.9403	66.575	74.1869	78.4652	73.457	73.0632	73.4568	80.067	72.8863	71.4181	72.9737
[truncated: 7 more columns]
