# Supplementary material for: Variations of intracellular density during the cell cycle arise from tip-growth regulation in fission yeast
Source: eLife. 2021 Jun 8;10:e64901. doi: 10.7554/eLife.64901 (PMC8221806; doi:10.7554/eLife.64901)
Supplement: Figure 5—figure supplement 1—source data 1. [file elife-64901-fig5-figsupp1-data1.xlsx]

## Sheet: Fig5S1_LatA
Density increase	Volume
1.14506	78.8784
1.18293	81.4602
1.12365	86.36
1.19474	92.6288
1.23458	93.1276
1.1264	94.8953
1.30376	102.327
1.18604	105.366
1.20866	108.922
1.1587	110.358
1.14445	110.705
1.19908	111.617
1.1517	111.841
1.19059	117.449
1.19356	118.125
1.19123	120.57
1.19879	131.853
1.25177	143.784
1.1846	143.814
1.21446	147.723
1.18531	149.388
1.15933	151.595
1.18025	152.765
1.1927	157.072
1.12523	157.515
1.2023	158.857
1.32902	159.92
1.13488	160.145
1.20529	161.044
1.20862	161.148
1.18128	173.705
1.20697	174.051
