# Supplementary material for: Variations of intracellular density during the cell cycle arise from tip-growth regulation in fission yeast
Source: eLife. 2021 Jun 8;10:e64901. doi: 10.7554/eLife.64901 (PMC8221806; doi:10.7554/eLife.64901)
Supplement: Figure 5—source data 1. [file elife-64901-fig5-data1.xlsx]

## Sheet: Fig5B_LatA
WT control DMSO
Time (min)		Volume (normalized)
0		1	1	1	1	1	1	1	1	1	1	1	1	1	1	1	1	1	1	1	1	1	1	1	1	1	1	1	1	1	1	1	1	1	1	1	1	1	1	1	1	1	1	1	1	1
5		1.05087	1.05778	1.01991	1.02028	NaN	NaN	1.01475	1.00275	1.01255	1.01116	0.983717	1.04578	1.03773	1.00889	1.02385	1.01865	1.01846	1.0186	1.18339	1.15592	1.02664	NaN	NaN	1.03256	1.04283	1.02545	1.0137	1.03856	1.02721	1.01963	1.08493	1.07331	1.07276	1.01815	1.02898	0.945082	1.04495	1.05087	NaN	1.02763	1.03367	0.974992	1.06136	1.05623	1.06469
10		1.09168	1.09843	NaN	NaN	NaN	NaN	1.03987	1.02524	1.02708	1.02973	0.978127	1.0889	1.07517	1.02797	1.05567	1.04888	1.0314	1.0532	NaN	NaN	1.05298	NaN	NaN	1.04167	1.05357	1.0266	1.0227	1.07525	1.05864	1.01889	1.13285	1.11358	1.10408	NaN	NaN	NaN	1.09568	1.10939	NaN	1.02907	1.04458	0.967998	1.10248	1.0952	1.08779
15		1.11892	1.13362	NaN	NaN	NaN	NaN	1.06879	1.04769	1.03739	1.03826	0.970094	1.13218	1.11152	1.05722	1.08123	1.07224	1.03881	1.08314	NaN	NaN	1.08575	NaN	NaN	1.04566	1.03222	1.00345	1.01926	1.11009	1.09429	1.03314	1.19804	1.1748	1.14336	NaN	NaN	NaN	1.14412	1.15905	NaN	1.0413	1.06082	0.959372	1.14966	1.14025	1.11826
20		1.13609	1.14998	NaN	NaN	NaN	NaN	1.10383	1.08279	1.04793	1.04846	0.96644	1.17413	1.1479	NaN	1.1049	1.09958	NaN	1.10893	NaN	NaN	1.10936	NaN	NaN	1.03439	NaN	NaN	1.00853	NaN	NaN	1.08734	1.25795	1.23167	1.15253	NaN	NaN	NaN	1.18726	1.20884	NaN	1.04947	1.07502	0.957294	1.19608	1.17979	1.12998
25		1.13624	1.15883	NaN	NaN	NaN	NaN	1.13995	1.11936	1.05399	1.0573	0.959836	1.21935	1.18772	NaN	1.13925	1.13614	NaN	1.12176	NaN	NaN	1.12978	NaN	NaN	1.02234	NaN	NaN	0.997722	NaN	NaN	NaN	1.26653	1.24381	1.16182	NaN	NaN	NaN	1.23704	1.26632	NaN	1.05918	1.09053	0.956866	1.24497	1.22448	1.15187
30		1.12271	1.15601	NaN	NaN	NaN	NaN	1.18173	1.16031	1.06015	1.06321	NaN	1.26321	1.22532	NaN	1.17183	1.17159	NaN	1.12504	NaN	NaN	1.14424	NaN	NaN	1.01128	NaN	NaN	0.981848	NaN	NaN	NaN	1.32159	1.29582	1.15862	NaN	NaN	NaN	1.28452	1.31932	NaN	1.0728	1.10763	NaN	1.29884	1.2717	1.18377
35		1.10966	1.14895	NaN	NaN	NaN	NaN	1.2204	1.19527	1.06516	1.07174	NaN	1.31898	1.28347	NaN	1.20874	1.2073	NaN	1.11931	NaN	NaN	1.14223	NaN	NaN	1.00433	NaN	NaN	0.982376	NaN	NaN	NaN	1.32916	1.30723	1.14917	NaN	NaN	NaN	1.33224	1.36848	NaN	1.09189	1.12948	NaN	1.35447	1.32444	1.21273
40		1.10542	1.13789	NaN	NaN	NaN	NaN	1.25673	1.2309	1.07756	1.08792	NaN	NaN	NaN	NaN	1.25635	1.25429	NaN	1.11314	NaN	NaN	1.13196	NaN	NaN	1.0139	NaN	NaN	0.985166	NaN	NaN	NaN	1.39021	1.3567	1.13328	NaN	NaN	NaN	1.37376	1.41623	NaN	1.1033	1.14833	NaN	NaN	NaN	1.2257
45		1.10959	1.13541	NaN	NaN	NaN	NaN	1.2866	1.26102	1.09169	1.10563	NaN	NaN	NaN	NaN	1.30901	1.29599	NaN	1.11038	NaN	NaN	1.12436	NaN	NaN	0.993403	NaN	NaN	1.01471	NaN	NaN	NaN	NaN	NaN	1.12791	NaN	NaN	NaN	1.41515	1.45986	NaN	1.12206	1.16819	NaN	NaN	NaN	1.23351
50		1.12236	1.14686	NaN	NaN	NaN	NaN	1.31724	1.28837	1.10709	1.11847	NaN	NaN	NaN	NaN	NaN	NaN	NaN	1.11145	NaN	NaN	1.11751	NaN	NaN	NaN	NaN	NaN	NaN	NaN	NaN	NaN	NaN	NaN	1.1217	NaN	NaN	NaN	1.4504	1.49429	NaN	1.14505	1.18828	NaN	NaN	NaN	1.22915
55		1.15567	1.15497	NaN	NaN	NaN	NaN	1.34849	1.31825	1.12328	1.13512	NaN	NaN	NaN	NaN	NaN	NaN	NaN	1.11901	NaN	NaN	1.11346	NaN	NaN	NaN	NaN	NaN	NaN	NaN	NaN	NaN	NaN	NaN	1.13524	NaN	NaN	NaN	1.47211	1.52541	NaN	1.16642	1.20824	NaN	NaN	NaN	1.20596
60		NaN	1.21298	NaN	NaN	NaN	NaN	1.37368	1.34882	1.14008	1.14828	NaN	NaN	NaN	NaN	NaN	NaN	NaN	NaN	NaN	NaN	1.12343	NaN	NaN	NaN	NaN	NaN	NaN	NaN	NaN	NaN	NaN	NaN	NaN	NaN	NaN	NaN	NaN	NaN	NaN	1.20557	1.23618	NaN	NaN	NaN	1.1838
65		NaN	NaN	NaN	NaN	NaN	NaN	1.41843	1.39247	1.15198	1.16338	NaN	NaN	NaN	NaN	NaN	NaN	NaN	NaN	NaN	NaN	NaN	NaN	NaN	NaN	NaN	NaN	NaN	NaN	NaN	NaN	NaN	NaN	NaN	NaN	NaN	NaN	NaN	NaN	NaN	NaN	NaN	NaN	NaN	NaN	1.17203
Time (min)		Density (normalized)
0		1	1	1	1	1	1	1	1	1	1	1	1	1	1	1	1	1	1	1	1	1	1	1	1	1	1	1	1	1	1	1	1	1	1	1	1	1	1	1	1	1	1	1	1	1
5		0.94735	0.98558	1.06139	1.0596	NaN	NaN	1.05463	1.0169	1.02496	1.03842	1.02256	1.00982	1.00147	1.01588	1.0345	1.02952	0.982996	1.0161	0.92651	0.878153	0.999076	NaN	NaN	0.997196	1.00919	0.994555	1.02118	1.00748	1.02221	0.986893	0.990422	0.961174	0.973662	1.0286	1.02154	1.05947	1.00169	1.02032	NaN	0.989787	1.0307	1.05552	0.967412	0.968291	0.965513
10		0.943715	0.988985	NaN	NaN	NaN	NaN	1.05561	1.01762	1.02387	1.04572	1.03214	1.01184	0.99844	1.01995	1.0356	1.02173	0.98062	1.0222	NaN	NaN	0.99454	NaN	NaN	0.999983	1.03842	1.0139	1.03222	1.02476	1.03339	1.01177	0.982115	0.958597	0.976345	NaN	NaN	NaN	0.971508	1.02076	NaN	0.990005	1.06891	1.07359	0.960623	0.955486	0.966605
15		0.939539	0.979575	NaN	NaN	NaN	NaN	1.06687	1.0205	1.03683	1.05966	1.05304	1.01059	0.991999	1.01222	1.05002	1.01909	0.99287	1.02036	NaN	NaN	0.980534	NaN	NaN	1.01193	1.08769	1.05804	1.05616	1.05183	1.03352	1.01918	0.963113	0.929276	0.968395	NaN	NaN	NaN	0.961667	1.01322	NaN	1.00017	1.0909	1.11037	0.939725	0.942475	0.962201
20		0.955468	0.986874	NaN	NaN	NaN	NaN	1.05187	1.0268	1.04005	1.06769	1.06584	0.995554	0.98474	NaN	1.05389	1.01698	NaN	1.02543	NaN	NaN	0.984625	NaN	NaN	1.03708	NaN	NaN	1.07727	NaN	NaN	0.993115	0.939496	0.906609	0.987702	NaN	NaN	NaN	0.946465	1.01311	NaN	1.01241	1.10649	1.12844	0.933137	0.936027	0.970082
25		0.969673	0.988345	NaN	NaN	NaN	NaN	1.0368	1.02389	1.03793	1.0724	1.10448	0.986547	0.971071	NaN	1.04777	0.999402	NaN	1.03925	NaN	NaN	0.99402	NaN	NaN	1.05426	NaN	NaN	1.10482	NaN	NaN	NaN	0.937919	0.91884	1.00232	NaN	NaN	NaN	0.92517	0.990186	NaN	1.01797	1.11081	1.18393	0.917619	0.916279	0.974115
30		1.00192	0.997919	NaN	NaN	NaN	NaN	1.01297	1.02261	1.04049	1.07382	NaN	0.967671	0.955852	NaN	1.03842	0.981588	NaN	1.05668	NaN	NaN	1.00955	NaN	NaN	1.08784	NaN	NaN	1.13003	NaN	NaN	NaN	0.922528	0.895634	1.02002	NaN	NaN	NaN	0.919316	0.959928	NaN	1.03269	1.11242	NaN	0.895739	0.902944	0.968042
35		1.01837	1.01302	NaN	NaN	NaN	NaN	0.999927	1.01883	1.04603	1.08337	NaN	0.944389	0.942776	NaN	1.03897	0.969308	NaN	1.07695	NaN	NaN	1.04054	NaN	NaN	1.1099	NaN	NaN	1.14624	NaN	NaN	NaN	0.92431	0.905876	1.04385	NaN	NaN	NaN	0.92299	0.942765	NaN	1.04227	1.11085	NaN	0.886522	0.865115	0.963777
40		1.03608	1.03085	NaN	NaN	NaN	NaN	0.985497	1.01773	1.04347	1.08113	NaN	NaN	NaN	NaN	1.02166	0.944663	NaN	1.10046	NaN	NaN	1.07669	NaN	NaN	1.12052	NaN	NaN	1.15897	NaN	NaN	NaN	0.92763	0.886289	1.06667	NaN	NaN	NaN	0.916449	0.931619	NaN	1.03873	1.12306	NaN	NaN	NaN	0.967718
45		1.0549	1.04333	NaN	NaN	NaN	NaN	0.978282	1.01632	1.04537	1.0806	NaN	NaN	NaN	NaN	1.00963	0.934927	NaN	1.11851	NaN	NaN	1.1012	NaN	NaN	1.14259	NaN	NaN	1.13755	NaN	NaN	NaN	NaN	NaN	1.0802	NaN	NaN	NaN	0.919555	0.918395	NaN	1.03947	1.1158	NaN	NaN	NaN	0.969912
50		1.06711	1.0576	NaN	NaN	NaN	NaN	0.983128	1.01977	1.0577	1.0715	NaN	NaN	NaN	NaN	NaN	NaN	NaN	1.12714	NaN	NaN	1.12676	NaN	NaN	NaN	NaN	NaN	NaN	NaN	NaN	NaN	NaN	NaN	1.09132	NaN	NaN	NaN	0.931283	0.919914	NaN	1.0475	1.12162	NaN	NaN	NaN	0.984299
55		1.07734	1.05882	NaN	NaN	NaN	NaN	0.988649	1.01496	1.05759	1.07767	NaN	NaN	NaN	NaN	NaN	NaN	NaN	1.14134	NaN	NaN	1.14191	NaN	NaN	NaN	NaN	NaN	NaN	NaN	NaN	NaN	NaN	NaN	1.09702	NaN	NaN	NaN	0.946241	0.936605	NaN	1.04512	1.1185	NaN	NaN	NaN	1.00986
60		NaN	1.0611	NaN	NaN	NaN	NaN	0.992712	1.0239	1.06689	1.0776	NaN	NaN	NaN	NaN	NaN	NaN	NaN	NaN	NaN	NaN	1.16597	NaN	NaN	NaN	NaN	NaN	NaN	NaN	NaN	NaN	NaN	NaN	NaN	NaN	NaN	NaN	NaN	NaN	NaN	1.06206	1.10786	NaN	NaN	NaN	1.03516
65		NaN	NaN	NaN	NaN	NaN	NaN	0.976405	0.993806	1.04914	1.102	NaN	NaN	NaN	NaN	NaN	NaN	NaN	NaN	NaN	NaN	NaN	NaN	NaN	NaN	NaN	NaN	NaN	NaN	NaN	NaN	NaN	NaN	NaN	NaN	NaN	NaN	NaN	NaN	NaN	NaN	NaN	NaN	NaN	NaN	1.06645
Time (min)		Mass (normalized)
0		1	1	1	1	1	1	1	1	1	1	1	1	1	1	1	1	1	1	1	1	1	1	1	1	1	1	1	1	1	1	1	1	1	1	1	1	1	1	1	1	1	1	1	1	1
5		0.994519	1.04217	1.08252	1.08109	NaN	NaN	1.07043	1.01988	1.03795	1.05021	1.00531	1.05587	1.03945	1.02506	1.05965	1.04903	1.00105	1.03513	1.09642	1.01507	1.0256	NaN	NaN	1.02947	1.05254	1.01987	1.0353	1.04653	1.05041	1.00565	1.07167	1.02771	1.04342	1.04726	1.05114	1.00128	1.04671	1.07307	NaN	1.017	1.06598	1.02817	1.02593	1.02197	1.02675
10		1.02952	1.08629	NaN	NaN	NaN	NaN	1.09777	1.04339	1.0516	1.07712	1.00911	1.10183	1.07342	1.04844	1.09333	1.07138	1.01152	1.07696	NaN	NaN	1.04679	NaN	NaN	1.04127	1.09346	1.04043	1.0558	1.1024	1.09407	1.02893	1.10901	1.06349	1.07745	NaN	NaN	NaN	1.06204	1.13276	NaN	1.01871	1.11755	1.03848	1.05804	1.04525	1.05077
15		1.05202	1.11042	NaN	NaN	NaN	NaN	1.13958	1.06904	1.07553	1.10018	1.02114	1.14359	1.10216	1.07014	1.13516	1.0918	1.0314	1.10479	NaN	NaN	1.06327	NaN	NaN	1.05744	1.12273	1.06169	1.07589	1.16763	1.13097	1.04944	1.14901	1.08641	1.10721	NaN	NaN	NaN	1.09826	1.17301	NaN	1.04173	1.15756	1.06505	1.0794	1.07435	1.07617
20		1.08561	1.1347	NaN	NaN	NaN	NaN	1.1604	1.11185	1.08993	1.11942	1.02991	1.16837	1.1295	NaN	1.16418	1.11768	NaN	1.13698	NaN	NaN	1.09169	NaN	NaN	1.07029	NaN	NaN	1.0854	NaN	NaN	1.07985	1.17903	1.11296	1.13821	NaN	NaN	NaN	1.12245	1.22281	NaN	1.06294	1.18962	1.08025	1.11434	1.1034	1.09641
25		1.10144	1.1451	NaN	NaN	NaN	NaN	1.18048	1.14639	1.09393	1.13384	1.06012	1.20123	1.15222	NaN	1.19332	1.13474	NaN	1.16552	NaN	NaN	1.12281	NaN	NaN	1.07592	NaN	NaN	1.10066	NaN	NaN	NaN	1.18512	1.13896	1.16418	NaN	NaN	NaN	1.14374	1.25194	NaN	1.07866	1.21093	1.13286	1.14046	1.12032	1.12217
30		1.12394	1.15315	NaN	NaN	NaN	NaN	1.19502	1.18674	1.10307	1.14165	NaN	1.22154	1.17079	NaN	1.21647	1.14879	NaN	1.18811	NaN	NaN	1.15497	NaN	NaN	1.09962	NaN	NaN	1.10888	NaN	NaN	NaN	1.21903	1.15961	1.18098	NaN	NaN	NaN	1.1803	1.26367	NaN	1.10812	1.23188	NaN	1.16328	1.1471	1.14526
35		1.12926	1.16331	NaN	NaN	NaN	NaN	1.21858	1.21741	1.11412	1.16118	NaN	1.24563	1.21003	NaN	1.25435	1.16846	NaN	1.20444	NaN	NaN	1.18748	NaN	NaN	1.11436	NaN	NaN	1.12588	NaN	NaN	NaN	1.22839	1.18277	1.19821	NaN	NaN	NaN	1.22903	1.28771	NaN	1.13808	1.25482	NaN	1.20077	1.1458	1.1679
40		1.14486	1.17275	NaN	NaN	NaN	NaN	1.23781	1.25214	1.12446	1.17597	NaN	NaN	NaN	NaN	1.28318	1.18453	NaN	1.22463	NaN	NaN	1.21814	NaN	NaN	1.13595	NaN	NaN	1.14144	NaN	NaN	NaN	1.2896	1.20243	1.20843	NaN	NaN	NaN	1.25902	1.31708	NaN	1.1461	1.2901	NaN	NaN	NaN	1.18537
45		1.17072	1.18437	NaN	NaN	NaN	NaN	1.25885	1.28167	1.14154	1.19482	NaN	NaN	NaN	NaN	1.32161	1.21166	NaN	1.24192	NaN	NaN	1.23741	NaN	NaN	1.13505	NaN	NaN	1.15428	NaN	NaN	NaN	NaN	NaN	1.21826	NaN	NaN	NaN	1.30212	1.34066	NaN	1.16642	1.30339	NaN	NaN	NaN	1.19568
50		1.19789	1.21301	NaN	NaN	NaN	NaN	1.29571	1.31435	1.17134	1.19831	NaN	NaN	NaN	NaN	NaN	NaN	NaN	1.25272	NaN	NaN	1.25902	NaN	NaN	NaN	NaN	NaN	NaN	NaN	NaN	NaN	NaN	NaN	1.22415	NaN	NaN	NaN	1.35086	1.37485	NaN	1.1996	1.33226	NaN	NaN	NaN	1.20822
55		1.24505	1.22302	NaN	NaN	NaN	NaN	1.3332	1.33806	1.18822	1.22333	NaN	NaN	NaN	NaN	NaN	NaN	NaN	1.27717	NaN	NaN	1.27153	NaN	NaN	NaN	NaN	NaN	NaN	NaN	NaN	NaN	NaN	NaN	1.24538	NaN	NaN	NaN	1.39297	1.42871	NaN	1.21944	1.35067	NaN	NaN	NaN	1.21641
60		NaN	1.28709	NaN	NaN	NaN	NaN	1.36342	1.38043	1.21627	1.23755	NaN	NaN	NaN	NaN	NaN	NaN	NaN	NaN	NaN	NaN	1.30989	NaN	NaN	NaN	NaN	NaN	NaN	NaN	NaN	NaN	NaN	NaN	NaN	NaN	NaN	NaN	NaN	NaN	NaN	1.28039	1.36951	NaN	NaN	NaN	1.22479
65		NaN	NaN	NaN	NaN	NaN	NaN	1.38496	1.38385	1.20858	1.28205	NaN	NaN	NaN	NaN	NaN	NaN	NaN	NaN	NaN	NaN	NaN	NaN	NaN	NaN	NaN	NaN	NaN	NaN	NaN	NaN	NaN	NaN	NaN	NaN	NaN	NaN	NaN	NaN	NaN	NaN	NaN	NaN	NaN	NaN	1.24991
WT LatA
Time (min)		Volume (µm3)
0		1	1	1	1	1	1	1	1	1	1	1	1	1	1	1	1	1	1	1	1	1	1	1	1	1	1	1	1	1	1	1	1	1	1	1	1	1	1	1	1	1	1	1	1
5		1.02577	1.02762	1.01316	0.993313	0.99387	0.990361	0.995632	0.992875	1.01135	0.98918	0.989571	0.978408	0.994661	1.01456	1.02494	0.998458	0.995688	1.02375	0.966884	0.989201	1.01018	0.986616	1.00577	0.96564	0.95432	1.01318	0.997516	1.00864	1.00037	1.01859	1.02103	1.01259	1.00019	1.00303	1.01162	1.01692	0.993357	0.986821	0.999991	0.998128	1.00344	1.00513	1.00663	0.993115
10		NaN	1.03282	1.02167	0.998548	0.998378	0.991978	1.00418	1.0051	1.01553	0.991006	0.988759	NaN	0.989585	1.01124	1.02614	0.987466	1.00208	1.02308	0.946748	0.992056	1.00914	0.971729	1.00066	0.969772	0.944093	1.00553	0.991114	1.0112	0.982981	1.02411	1.02867	1.02948	0.989137	0.997893	1.00856	1.01221	0.984225	0.979233	0.997875	0.99468	1.00367	1.00039	0.9991	0.996753
15		NaN	1.0402	1.02627	1.00016	1.0008	0.983729	1.00798	1.01331	1.01946	0.987026	0.983478	NaN	0.981846	1.00639	1.02991	0.988706	1.00104	1.02523	0.938383	0.993001	1.01108	0.964082	0.998164	0.956502	0.919359	1.00172	0.985663	1.01288	0.973922	1.03532	1.03561	1.04407	0.980615	0.995028	1.0048	1.01315	0.979338	0.971744	0.992557	0.993787	1.00237	0.999078	0.994908	0.994146
20		NaN	1.04529	1.02977	1.00676	1.00445	0.984574	1.00834	1.01794	1.01806	0.984098	0.981119	NaN	0.973188	0.99613	1.02737	0.982718	1.00605	1.01501	0.92939	0.995261	1.00532	0.95776	0.991691	0.985468	0.934382	0.993236	0.978476	1.01006	0.959326	1.02429	1.04009	1.06047	0.97307	0.992247	0.997014	1.00853	0.974141	0.963454	0.986112	0.990733	1.00264	0.997522	0.981283	0.991653
25		NaN	1.04759	1.03261	1.00976	1.00449	0.982586	1.00825	1.0271	1.02137	0.986949	0.978924	NaN	0.963952	0.989072	1.02266	1.0062	0.994822	1.00514	0.898715	0.997739	1.00157	0.954737	0.986333	0.98673	0.931666	0.982733	0.970246	1.00321	0.952189	NaN	1.03433	1.06359	0.962478	0.987009	0.989861	1.00543	0.970796	0.959819	0.979343	0.98528	0.995785	0.99531	0.971989	0.992316
30		NaN	1.05157	1.03103	1.0131	1.00482	0.974211	1.00333	1.02634	1.0199	0.986329	0.97925	NaN	0.951783	0.97466	1.01913	NaN	NaN	0.99749	0.896049	0.9978	1.00032	0.9544	0.984941	0.99009	0.925025	0.975155	0.966199	0.995452	0.947671	NaN	1.0342	1.06463	0.952121	0.978515	0.98474	1.00155	0.965886	0.954173	0.972671	0.983467	0.994786	0.99272	0.96276	0.989869
35		NaN	1.05481	1.03197	1.01801	1.0052	0.970841	0.995793	1.02415	1.02193	0.985208	0.977865	NaN	0.942993	0.971354	1.01622	NaN	NaN	0.990138	0.872286	1.00441	1.00075	0.958455	0.978967	0.993251	0.926947	0.971474	0.956556	0.990894	0.945458	NaN	1.02827	1.06194	0.94985	0.975689	0.980701	1.00217	0.965444	0.952824	0.968507	0.981862	0.988969	0.986388	0.955969	0.986202
40		NaN	1.06359	1.03387	1.02198	1.00167	0.968787	0.988565	1.02052	1.02438	0.988267	0.978994	NaN	0.936539	0.963976	NaN	NaN	NaN	0.984808	0.851691	1.0074	0.999655	0.956926	0.977651	0.988502	0.921925	0.966647	0.949733	0.985253	0.94301	NaN	1.02812	1.05048	0.950548	0.976819	0.98005	1.0022	0.962435	0.951883	0.961855	0.972957	0.986359	0.98	0.950525	0.986167
45		NaN	1.06467	1.03425	1.02459	1.00311	0.956705	0.984317	1.01732	1.02824	0.992211	0.98236	NaN	0.931485	0.958456	NaN	NaN	NaN	0.986584	0.848637	1.00805	0.998256	0.959421	0.977451	0.991097	0.921176	0.964766	0.950177	0.982536	0.938593	NaN	NaN	NaN	0.950989	0.975181	0.979737	0.997692	0.95778	0.95313	0.958572	0.971335	0.981302	0.97557	0.949262	0.988515
50		NaN	1.06956	1.03558	1.02905	1.00337	0.952949	0.980432	1.01367	1.02844	0.991934	0.979835	NaN	0.929296	0.955521	NaN	NaN	NaN	0.986569	0.867255	1.0139	1.00445	0.958066	0.977661	0.997624	0.919792	0.96206	0.946014	0.983315	0.934223	NaN	NaN	NaN	0.951655	0.971299	0.977746	0.995414	0.956476	0.950261	0.953904	0.969349	0.980805	0.971488	0.943122	0.989209
55		NaN	1.07736	1.04222	1.0328	1.00207	0.949965	0.979504	1.01215	1.02871	0.991344	0.981333	NaN	0.927013	0.953865	NaN	NaN	NaN	0.981774	0.890366	1.01613	1.00626	0.959252	0.97751	1.02184	0.943002	0.961288	0.942284	0.983647	0.932093	NaN	NaN	NaN	0.958785	0.974053	0.981166	0.99363	0.954896	0.948386	0.950435	0.964255	0.977272	0.968212	0.941948	0.991524
60		NaN	NaN	NaN	1.03756	1.00441	0.944887	0.976721	1.00656	1.02663	0.990388	0.979383	NaN	NaN	NaN	NaN	NaN	NaN	0.980632	0.916523	1.012	1.00339	0.959529	0.98027	1.05126	0.962461	0.960231	0.945311	0.983813	0.928064	NaN	NaN	NaN	0.960736	0.969396	0.9803	0.987701	0.951382	0.944609	0.949865	0.964368	0.976192	0.971805	0.937425	0.99628
65		NaN	NaN	NaN	1.04937	1.00465	0.948481	0.982588	1.00631	1.01602	0.985673	0.988004	NaN	NaN	NaN	NaN	NaN	NaN	0.962309	0.969436	1.01221	1.00321	0.959767	0.982617	1.06013	0.973547	0.959015	0.939071	0.98359	0.935685	NaN	NaN	NaN	0.966779	0.966794	0.992252	0.984882	0.946578	0.941096	0.95545	0.959297	0.978935	0.961417	0.944001	1.00344
Time (min)		Density (mg/ml)
0		1	1	1	1	1	1	1	1	1	1	1	1	1	1	1	1	1	1	1	1	1	1	1	1	1	1	1	1	1	1	1	1	1	1	1	1	1	1	1	1	1	1	1	1
5		0.978699	0.990083	0.969073	1.04026	1.04762	1.02595	1.03769	1.02219	0.989972	1.02702	1.03721	1.07109	1.01449	1.01387	0.963729	1.02995	1.03151	0.98575	1.05786	1.03495	1.03282	1.03013	1.03412	1.04872	1.02806	0.987509	1.01589	1.01334	1.0213	0.995334	0.976446	0.986272	1.03167	0.985336	0.997099	1.01356	1.00062	1.04231	1.01634	1.01749	1.00796	1.00892	0.997393	1.03807
10		NaN	1.00855	0.978968	1.05665	1.0637	1.03774	1.04998	1.01994	1.0061	1.05932	1.04493	NaN	1.03627	1.01925	0.968231	1.03192	1.04246	0.996691	1.10168	1.04963	1.04451	1.06566	1.05779	1.07584	1.04116	1.01023	1.02673	1.02929	1.06316	1.00091	1.01348	1.04324	1.0539	1.00451	1.00936	1.03399	1.03027	1.05565	1.03767	1.01727	1.02986	1.03168	1.01133	1.04922
15		NaN	1.02581	0.989931	1.07591	1.08152	1.06127	1.06561	1.02693	1.01735	1.08711	1.05907	NaN	1.05795	1.03307	0.975999	1.04643	1.05157	1.00294	1.13022	1.06384	1.05754	1.08687	1.07421	1.10379	1.06789	1.02404	1.04357	1.04502	1.09284	1.00147	1.0247	1.06643	1.08113	1.0149	1.02701	1.05202	1.04054	1.07806	1.04405	1.03146	1.04715	1.04727	1.02245	1.07023
20		NaN	1.04195	1.0041	1.08842	1.09067	1.06806	1.08455	1.03738	1.03986	1.11625	1.07652	NaN	1.07992	1.05032	0.991654	1.04743	1.05444	1.0216	1.14733	1.07405	1.0759	1.10706	1.09309	1.11206	1.05838	1.04422	1.06081	1.06539	1.12737	1.03119	1.06507	1.12426	1.09416	1.02949	1.04876	1.07211	1.05271	1.10113	1.06097	1.04449	1.06149	1.06145	1.04748	1.09239
25		NaN	1.06406	1.02521	1.10163	1.1012	1.08892	1.09111	1.04347	1.06031	1.14649	1.08664	NaN	1.1016	1.0606	1.01042	1.07253	1.04555	1.04473	1.19495	1.08725	1.09047	1.12533	1.10593	1.12567	1.08359	1.05795	1.08281	1.08698	1.14933	NaN	1.06759	1.14397	1.10458	1.05099	1.07626	1.09389	1.07117	1.11768	1.07761	1.059	1.08804	1.0755	1.0668	1.10278
30		NaN	1.08095	1.03519	1.10629	1.11321	1.11353	1.10346	1.06238	1.07993	1.15715	1.10577	NaN	1.14141	1.07966	1.03405	NaN	NaN	1.05484	1.20352	1.10216	1.11581	1.13778	1.11569	1.13731	1.09231	1.0729	1.10173	1.11083	1.17363	NaN	1.07218	1.14722	1.13222	1.06416	1.09652	1.12303	1.09047	1.13847	1.0889	1.07539	1.10339	1.08946	1.08725	1.12296
35		NaN	1.09396	1.051	1.1136	1.12157	1.12773	1.11604	1.0779	1.09658	1.17364	1.13074	NaN	1.16319	1.08814	1.04499	NaN	NaN	1.07412	1.23857	1.10567	1.13347	1.13903	1.13554	1.14733	1.10059	1.08601	1.1321	1.1279	1.19207	NaN	1.08312	1.17321	1.1505	1.07127	1.11843	1.13718	1.09631	1.15294	1.09698	1.10371	1.12877	1.10834	1.10225	1.14207
40		NaN	1.10757	1.05533	1.12639	1.13311	1.14866	1.12506	1.09665	1.11135	1.18985	1.15247	NaN	1.19392	1.09407	NaN	NaN	NaN	1.08904	1.26762	1.11958	1.15158	1.15319	1.15148	1.17436	1.12338	1.09408	1.147	1.15012	1.21307	NaN	1.10559	1.17313	1.15187	1.07342	1.1353	1.15466	1.11165	1.16536	1.12881	1.12517	1.14634	1.13188	1.12113	1.15102
45		NaN	1.12448	1.06985	1.13396	1.14835	1.18817	1.12938	1.11228	1.12513	1.19426	1.16213	NaN	1.21619	1.10051	NaN	NaN	NaN	1.09545	1.28916	1.14044	1.16615	1.15741	1.16334	1.18426	1.1374	1.09892	1.15266	1.16451	1.23848	NaN	NaN	NaN	1.17218	1.07995	1.1526	1.17308	1.13411	1.16937	1.13705	1.14029	1.16749	1.15223	1.1325	1.15535
50		NaN	1.13775	1.07893	1.14246	1.1598	1.20768	1.14434	1.12778	1.14091	1.21457	1.17194	NaN	1.22856	1.09872	NaN	NaN	NaN	1.10311	1.27701	1.15423	1.17674	1.1708	1.17771	1.20552	1.13929	1.11481	1.16153	1.17354	1.26979	NaN	NaN	NaN	1.1898	1.09156	1.16722	1.18489	1.14393	1.18034	1.14786	1.15464	1.17817	1.1663	1.15194	1.16727
55		NaN	1.13495	1.09785	1.16566	1.16714	1.23267	1.15845	1.13197	1.1572	1.21985	1.1832	NaN	1.21947	1.12058	NaN	NaN	NaN	1.12831	1.26046	1.1652	1.1864	1.18461	1.19155	1.19582	1.12689	1.13042	1.17649	1.18818	1.2839	NaN	NaN	NaN	1.18457	1.08762	1.17711	1.19475	1.15081	1.19452	1.16165	1.17109	1.18727	1.18597	1.16522	1.17101
60		NaN	NaN	NaN	1.17426	1.18018	1.26333	1.1816	1.14499	1.18308	1.22977	1.18527	NaN	NaN	NaN	NaN	NaN	NaN	1.14293	1.23893	1.19648	1.20259	1.19774	1.19817	1.18853	1.1078	1.13962	1.17434	1.19532	1.30558	NaN	NaN	NaN	1.19833	1.10146	1.19478	1.20742	1.16387	1.20804	1.16656	1.16901	1.19098	1.18883	1.18106	1.17976
65		NaN	NaN	NaN	1.19299	1.16584	1.27877	1.20785	1.13007	1.21675	1.18774	1.20903	NaN	NaN	NaN	NaN	NaN	NaN	1.19225	1.17259	1.19433	1.21879	1.22246	1.20238	1.15423	1.08115	1.18307	1.20647	1.21908	1.28685	NaN	NaN	NaN	1.19305	1.07727	1.18721	1.22111	1.17519	1.22412	1.1876	1.16951	1.18545	1.22648	1.17524	1.18109
Time (min)		Mass (pg)
0		1	1	1	1	1	1	1	1	1	1	1	1	1	1	1	1	1	1	1	1	1	1	1	1	1	1	1	1	1	1	1	1	1	1	1	1	1	1	1	1	1	1	1	1
5		1.00392	1.01724	0.981626	1.03318	1.04103	1.01587	1.03309	1.0148	1.00105	1.01569	1.02623	1.04796	1.00898	1.0286	0.987319	1.02835	1.02702	1.00899	1.02021	1.02353	1.04331	1.01614	1.04014	1.01134	0.978989	1.00046	1.01336	1.02215	1.02132	1.01374	0.998353	1.00085	1.03191	0.988186	1.00866	1.03082	0.993931	1.02828	1.01626	1.01546	1.0113	1.01411	1.00395	1.03077
10		NaN	1.04162	1.00022	1.05509	1.06195	1.02922	1.05448	1.02505	1.02174	1.04975	1.03308	NaN	1.02519	1.03061	0.993212	1.01889	1.04466	1.01958	1.03923	1.0412	1.05408	1.03455	1.05835	1.04208	0.980893	1.01547	1.0175	1.04086	1.04361	1.02496	1.04372	1.07663	1.04208	1.00216	1.01792	1.04641	1.01348	1.03328	1.03532	1.01176	1.03357	1.03193	1.01015	1.04578
15		NaN	1.0669	1.01603	1.07611	1.08241	1.04353	1.0742	1.04052	1.03714	1.07301	1.04156	NaN	1.03829	1.03925	1.00489	1.03473	1.05269	1.02805	1.05821	1.05643	1.06917	1.04731	1.07207	1.05491	0.979586	1.02521	1.02843	1.0584	1.06289	1.03667	1.06227	1.1161	1.05963	1.00954	1.03148	1.06547	1.01861	1.04736	1.03622	1.02499	1.04944	1.04611	1.01684	1.06391
20		NaN	1.08913	1.03411	1.09574	1.09554	1.05118	1.0934	1.05598	1.05874	1.09853	1.05608	NaN	1.05057	1.0459	1.01851	1.02954	1.06079	1.03635	1.06263	1.069	1.08159	1.05988	1.08388	1.09492	0.986844	1.03658	1.03763	1.07592	1.08091	1.05624	1.10752	1.19213	1.06421	1.02109	1.04507	1.08101	1.02528	1.06038	1.04577	1.03443	1.06397	1.05875	1.02715	1.08301
25		NaN	1.11461	1.05857	1.11228	1.10599	1.06926	1.09982	1.07172	1.08297	1.1314	1.06357	NaN	1.06135	1.04859	1.0331	1.07918	1.04013	1.04956	1.07115	1.08469	1.09193	1.07431	1.09071	1.11005	1.00839	1.03955	1.05023	1.08992	1.09412	NaN	1.10412	1.21662	1.063	1.03729	1.06487	1.09971	1.03973	1.07233	1.05513	1.04318	1.08328	1.07047	1.03628	1.09402
30		NaN	1.13666	1.06731	1.1206	1.1185	1.08433	1.10673	1.09012	1.10137	1.14125	1.08267	NaN	1.08557	1.05199	1.0538	NaN	NaN	1.05177	1.07524	1.09969	1.11581	1.08582	1.0988	1.12483	1.00856	1.04613	1.06415	1.10538	1.11218	NaN	1.10871	1.22124	1.07754	1.04109	1.07932	1.12469	1.05303	1.08615	1.05902	1.0575	1.0975	1.08138	1.04642	1.11144
35		NaN	1.15376	1.08455	1.13353	1.12729	1.09442	1.11111	1.10369	1.12061	1.15633	1.10591	NaN	1.09624	1.05684	1.06194	NaN	NaN	1.06329	1.07825	1.11042	1.13424	1.09167	1.11139	1.13875	1.01861	1.05495	1.08249	1.1173	1.12684	NaN	1.11366	1.24583	1.09244	1.04506	1.09683	1.13952	1.05815	1.09842	1.06231	1.08352	1.11613	1.09279	1.05341	1.12628
40		NaN	1.17801	1.09102	1.15102	1.13492	1.11198	1.11219	1.11912	1.13844	1.17596	1.1284	NaN	1.11764	1.05451	NaN	NaN	NaN	1.07248	1.07956	1.12779	1.15125	1.10349	1.1256	1.15792	1.03231	1.0575	1.08907	1.133	1.14381	NaN	1.13668	1.23234	1.09455	1.04838	1.11262	1.15712	1.06972	1.10927	1.08538	1.0944	1.13053	1.10853	1.06565	1.13508
45		NaN	1.19736	1.10656	1.16173	1.15205	1.13622	1.11157	1.13138	1.15695	1.18499	1.14168	NaN	1.13268	1.05465	NaN	NaN	NaN	1.08077	1.09393	1.14947	1.1641	1.11042	1.13698	1.17122	1.04499	1.06015	1.095	1.14418	1.16208	NaN	NaN	NaN	1.11446	1.05299	1.12921	1.17023	1.08611	1.11454	1.08947	1.10711	1.14544	1.12369	1.07496	1.14207
50		NaN	1.21704	1.11738	1.1756	1.16367	1.15038	1.12186	1.1431	1.17332	1.2047	1.14825	NaN	1.14168	1.04971	NaN	NaN	NaN	1.0883	1.10624	1.17013	1.18205	1.12168	1.15129	1.20082	1.04524	1.07251	1.09857	1.15394	1.18594	NaN	NaN	NaN	1.1321	1.06008	1.14113	1.17938	1.0941	1.12158	1.09464	1.11893	1.15536	1.13295	1.08618	1.1547
55		NaN	1.22275	1.1442	1.20398	1.16958	1.17064	1.13466	1.14563	1.19018	1.20922	1.1611	NaN	1.13046	1.06889	NaN	NaN	NaN	1.10744	1.11921	1.18379	1.19387	1.1363	1.16473	1.21967	1.05971	1.08663	1.10839	1.16872	1.19655	NaN	NaN	NaN	1.13573	1.05929	1.15483	1.187	1.09881	1.13276	1.10393	1.12917	1.16024	1.14817	1.09741	1.16114
60		NaN	NaN	NaN	1.2184	1.18534	1.19372	1.15418	1.15249	1.21432	1.21783	1.16083	NaN	NaN	NaN	NaN	NaN	NaN	1.12033	1.13182	1.21085	1.20681	1.14924	1.17454	1.24929	1.06605	1.09424	1.10982	1.17596	1.21161	NaN	NaN	NaN	1.15125	1.06776	1.17117	1.19252	1.10723	1.14108	1.10812	1.1273	1.16256	1.15514	1.10705	1.17538
65		NaN	NaN	NaN	1.25189	1.17126	1.21289	1.18682	1.1372	1.23625	1.17073	1.19453	NaN	NaN	NaN	NaN	NaN	NaN	1.14732	1.13675	1.20892	1.2227	1.17328	1.18148	1.22364	1.05255	1.13459	1.13296	1.19907	1.20409	NaN	NaN	NaN	1.15342	1.0415	1.17801	1.20265	1.11241	1.15201	1.13469	1.1219	1.16047	1.17916	1.10942	1.18515
