# Supplementary material for: Variations of intracellular density during the cell cycle arise from tip-growth regulation in fission yeast
Source: eLife. 2021 Jun 8;10:e64901. doi: 10.7554/eLife.64901 (PMC8221806; doi:10.7554/eLife.64901)
Supplement: Figure 6—figure supplement 1—source data 1. [file elife-64901-fig6-figsupp1-data1.xlsx]

## Sheet: Fig6S1A-B_PoleGrowthDensity
Figure6_S1A			Figure6_S1B
Pole widths			Old poles
Old poles	New poles		Growth (µm)	Density (mg/ml)	Pole width (µm)
3.98822	4.27489		3.02171	294.316	3.98822
4.18312	3.8386		3.96183	291.48	3.95457
4.11901	3.97574		4.29333	278.377	4.04487
3.95457	4.151		3.90299	273.457	3.94638
3.77066	4.09645		3.04861	285.954	3.98365
4.04487	3.83957		5.60359	269.668	3.98954
3.88683	3.9922		4.68971	264.293	4.04947
3.84045	4.13809		4.56128	266.033	3.95143
4.15082	3.93952		0.605125	312.875	3.9649
3.94638	3.87026		4.59434	264.093	3.996
3.78503	4.13113		4.93476	277.947	3.95787
3.98365	4.24083		4.95481	253.97	3.92907
3.84332	4.04397		4.49238	269.919	4.05014
3.98954	3.96549		2.20941	282.935	3.94297
3.75639	4.07312		4.26568	266.025	4.02546
3.80953	3.95761		4.44814	267.702	3.91123
3.88916	4.30421		4.28957	259.213	3.95678
3.76254	4.29164		4.71025	285.656	4.00073
3.6192	4.31598		4.78046	273.188	3.9643
3.87632	4.05612		4.3549	277.625	3.95044
4.10606	4.26402		3.10961	264.72	4.02586
4.177	3.82789		4.74306	256.575	3.98269
4.04947	3.78545		3.9057	274.446	3.94932
3.95143	3.89664		3.43577	269.781	3.9693
3.83591	4.21119		4.00392	278.002	3.98006
3.84592	4.15437		4.42423	296.586	4.0134
3.78877	4.00241		4.58762	265.19	4.04775
3.9649	3.96526		2.72964	291.684	3.95981
3.61577	4.17621		4.63817	267.229	4.01001
3.996	4.12609		4.36746	280.345	3.94227
4.11313	4.05902		4.90866	264.215	3.95454
3.81142	4.17787		3.75118	286.54	4.01089
3.81915	3.86391		5.30063	280.148	4.00475
4.10599	3.95584
3.78773	4.36068		New poles
3.95787	4.49747		1.31908	305.615	3.97574
3.89899	4.38405		1.52567	287.848	4.09645
3.92907	4.29687		3.39574	288.876	3.9922
4.05014	3.99716		2.17383	297.331	3.93952
3.88675	4.07562		3.49135	287.216	4.04397
3.94297	4.15532		1.82926	293.178	3.96549
4.02546	4.22438		4.89525	288.509	4.07312
3.87083	4.28504		2.35036	276.273	3.95761
3.91123	4.08782		1.4515	284.773	4.05612
3.82151	4.17728		0.44664	283.273	4.00241
3.95678	4.24714		5.57094	283.93	3.96526
3.80467	4.03356		5.41016	279.991	4.05902
4.00073	3.92806		2.15901	291.34	3.95584
3.78992	3.98899		2.53803	286.963	3.99716
3.9643	3.922		1.17323	277.732	4.07562
3.95044	4.19562		1.81369	282.584	4.08782
3.83317	4.13553		1.90964	285.188	4.03356
4.02586	3.75073		2.90706	287.013	3.92806
3.98269	3.90597		2.26852	291.799	3.98899
3.94932	4.25046		2.0023	280.618	3.922
3.9693	4.28293		2.41576	272.614	3.90597
3.98006	4.03377		1.25652	297.317	4.03377
4.0134	4.28846		2.87055	275.439	4.06396
3.84106	4.06396		1.15005	275.737	4.01634
4.04775	4.01634		1.2776	293.812	3.97234
4.12862	3.84071		0.952838	287.565	4.01757
3.95981	4.23624		0.84601	284.8	3.91586
4.01001	4.34255		2.78889	286.297	4.0824
4.22949	3.97234		4.90656	294.468	3.99054
3.88498	4.19582
3.76367	4.47293
4.10521	4.28789
3.69044	4.01757
3.94227	4.2811
3.8243	4.18411
3.82756	4.16883
3.77868	4.13249
3.89839	3.91586
3.95454	3.88276
3.85021	3.89231
4.01089	4.0824
3.71977	3.99054
4.00475	3.8844
