# Supplementary material for: Variations of intracellular density during the cell cycle arise from tip-growth regulation in fission yeast
Source: eLife. 2021 Jun 8;10:e64901. doi: 10.7554/eLife.64901 (PMC8221806; doi:10.7554/eLife.64901)
Supplement: Figure 6—figure supplement 2—source data 1. [file elife-64901-fig6-figsupp2-data1.xlsx]

## Sheet: Fig6S2_OE_NE_FITC
No RNAse
Intensity	Condition		Profile intensity
0.983068	NE		Value 0	Value 1	Value 2	Value 3	Value 4	Value 5	Value 6	Value 7	Value 8	Value 9	Value 10	Value 11	Value 12	Value 13	Value 14	Value 15	Value 16	Value 17	Value 18	Value 19	Value 20	Value 21	Value 22	Value 23	Value 24	Value 25	Value 0	Value 1	Value 2	Value 3	Value 4	Value 5	Value 6	Value 7	Value 8	Value 9	Value 10	Value 11	Value 12	Value 13	Value 14	Value 15	Value 16	Value 17	Value 18	Value 19	Value 20
0.990579	NE		0	0.000987972	0.00207404	0.0208104	0.0226821	0	0	0	0.0561797	0.102309	0.00785792	0	0.0162301	0.00319062	0.00331042	0	0	0.00767499	0	0	0	0.0224883	0	0.0173203	0	0.0629379	0	0.000832247	0.0811926	0	0.00162768	0.0117014	0	0	0.0168583	0	0.0555558	0.0299913	0.0166418	0.0258346	0	0.0103167	0	0.110516	0	0	0.0233946
0.952473	NE		0.00661394	0.00899807	0.0487758	0.0754264	0.0883154	0.075367	0.0539846	0.197972	0.216732	0.25915	0.0787495	0.147053	0.173259	0.197211	0.140487	0.152274	0.153886	0.0673094	0.13288	0.184898	0.15336	0.125221	0.0562292	0.072487	0.0894122	0.231183	0.0327711	0.0408997	0.256988	0.126745	0.0334157	0.0806982	0.0440856	0.0378138	0.161474	0.12666	0.103744	0.0626906	0.0225905	0.188638	0.117049	0.198581	0.0550652	0.284525	0.0636742	0.0487818	0.0603528
0.978577	NE		0.0207566	0.0306822	0.142604	0.184379	0.203204	0.203909	0.16336	0.402391	0.397092	0.420396	0.211391	0.335588	0.320315	0.387966	0.313531	0.334165	0.324348	0.176573	0.309633	0.371051	0.343518	0.278296	0.171936	0.173402	0.246449	0.397838	0.103173	0.118066	0.40837	0.306414	0.0961735	0.196288	0.142409	0.109654	0.337352	0.312857	0.183981	0.117145	0.104479	0.377249	0.302521	0.346571	0.172273	0.46368	0.195538	0.154248	0.133817
0.976847	NE		0.0527873	0.0853975	0.268787	0.339552	0.359238	0.372612	0.325171	0.536904	0.534137	0.556963	0.374873	0.49546	0.485365	0.524041	0.469245	0.486279	0.45951	0.320022	0.48996	0.500495	0.510293	0.426123	0.314279	0.3127	0.422743	0.517906	0.21673	0.243593	0.533244	0.471478	0.200258	0.352832	0.284708	0.235459	0.492994	0.48135	0.288643	0.203249	0.251439	0.530616	0.48436	0.432084	0.318819	0.603184	0.326336	0.303618	0.253056
0.965784	NE		0.131871	0.194594	0.412228	0.4981	0.505954	0.521841	0.491945	0.616084	0.654362	0.646049	0.512474	0.629754	0.606989	0.631083	0.577363	0.606723	0.555251	0.454189	0.624003	0.572469	0.634066	0.549411	0.445019	0.420587	0.57124	0.606514	0.354856	0.384	0.629162	0.601616	0.329016	0.509666	0.438689	0.392154	0.595188	0.610578	0.403534	0.308267	0.429002	0.647758	0.632504	0.473333	0.448132	0.698106	0.442205	0.460022	0.398749
0.965479	NE		0.276442	0.342373	0.53033	0.617066	0.611152	0.626692	0.602753	0.631962	0.725748	0.72585	0.621536	0.724169	0.689696	0.68014	0.659651	0.698074	0.627876	0.56269	0.702894	0.618043	0.705875	0.623844	0.542177	0.496519	0.656709	0.66049	0.476977	0.515938	0.697768	0.699335	0.446009	0.616012	0.564782	0.528168	0.670102	0.691512	0.495693	0.41211	0.575836	0.713835	0.720353	0.497118	0.54909	0.760446	0.527719	0.580372	0.534783
0.977828	NE		0.458094	0.476042	0.621111	0.718667	0.6877	0.679544	0.689921	0.627611	0.774123	0.78047	0.704621	0.782202	0.765125	0.684485	0.713659	0.755057	0.69306	0.633934	0.765526	0.641756	0.763811	0.686845	0.623578	0.542344	0.713876	0.681664	0.574378	0.605152	0.729334	0.772488	0.534368	0.693271	0.657751	0.604726	0.703722	0.755169	0.564743	0.502107	0.674372	0.758382	0.7829	0.511734	0.627985	0.813928	0.597903	0.667082	0.635856
0.984976	NE		0.606936	0.572294	0.695109	0.770289	0.748034	0.708227	0.760079	0.630056	0.830009	0.817642	0.764931	0.829213	0.809454	0.69393	0.769279	0.784883	0.761647	0.687154	0.811547	0.647125	0.805641	0.729853	0.682368	0.587403	0.746864	0.71345	0.64012	0.660623	0.7589	0.824949	0.586443	0.767337	0.718776	0.674774	0.739772	0.806058	0.624337	0.578519	0.756134	0.803781	0.822218	0.547166	0.705275	0.850764	0.633293	0.729363	0.707362
0.98848	NE		0.715197	0.648697	0.751105	0.802844	0.793444	0.736176	0.82258	0.680641	0.854147	0.848156	0.805776	0.839988	0.843291	0.696994	0.811156	0.794379	0.825275	0.72239	0.83867	0.667282	0.851235	0.770482	0.745181	0.643526	0.774153	0.728072	0.689151	0.717573	0.780549	0.869477	0.612101	0.831664	0.771071	0.71124	0.777246	0.83953	0.677226	0.657491	0.824932	0.834498	0.840719	0.588928	0.76061	0.892511	0.667289	0.794411	0.750917
0.936301	NE		0.791702	0.706264	0.798595	0.823007	0.833089	0.756047	0.86785	0.759427	0.868651	0.87561	0.83581	0.859923	0.874641	0.689135	0.8507	0.793734	0.86177	0.748388	0.865357	0.655407	0.873238	0.797776	0.786987	0.702081	0.797954	0.747681	0.745473	0.750541	0.798057	0.891935	0.643868	0.868588	0.822044	0.734177	0.776814	0.836983	0.734604	0.707717	0.885399	0.854689	0.863492	0.665995	0.810238	0.926404	0.698086	0.852954	0.78713
0.993659	NE		0.833655	0.751351	0.839565	0.843282	0.852216	0.782407	0.901322	0.852845	0.878236	0.891844	0.848598	0.876459	0.887333	0.693569	0.862821	0.750581	0.895323	0.762713	0.875798	0.667805	0.889765	0.836323	0.843531	0.763132	0.822795	0.775399	0.778275	0.789543	0.819321	0.912834	0.695685	0.90567	0.869966	0.769823	0.802153	0.843345	0.784335	0.761258	0.910086	0.865518	0.878198	0.748058	0.85197	0.955966	0.742216	0.878781	0.806937
0.984902	NE		0.868967	0.810856	0.868184	0.853362	0.881211	0.804222	0.924423	0.8999	0.888092	0.899718	0.878472	0.898885	0.906712	0.72388	0.873377	0.713172	0.923451	0.779476	0.888638	0.712935	0.901335	0.870057	0.868063	0.81411	0.832459	0.819052	0.820123	0.802248	0.816525	0.926711	0.749471	0.925512	0.890503	0.78599	0.798794	0.854388	0.816544	0.79082	0.934446	0.880631	0.8925	0.825265	0.885163	0.958643	0.765353	0.908215	0.824776
0.950531	NE		0.893279	0.845025	0.880275	0.865965	0.903007	0.833793	0.935287	0.932313	0.884269	0.914161	0.882026	0.88935	0.921803	0.77259	0.880662	0.690483	0.952203	0.806662	0.903447	0.769202	0.9043	0.887104	0.880827	0.849842	0.837436	0.85384	0.861597	0.813516	0.811884	0.943771	0.804048	0.959649	0.926688	0.80262	0.806302	0.876835	0.839005	0.825049	0.948522	0.888754	0.903653	0.877629	0.92084	0.958521	0.807235	0.930274	0.848783
0.944969	NE		0.920839	0.867256	0.90309	0.852567	0.917492	0.845465	0.953234	0.968423	0.883648	0.915351	0.902084	0.904595	0.936315	0.80966	0.88856	0.702306	0.978835	0.825835	0.912918	0.827149	0.923739	0.901992	0.893676	0.879999	0.849604	0.875994	0.873616	0.809188	0.81604	0.959016	0.843484	0.972992	0.938016	0.822459	0.811325	0.893989	0.868101	0.851037	0.961036	0.901715	0.926796	0.918846	0.931205	0.959124	0.83674	0.924913	0.875667
0.958497	NE		0.924113	0.890748	0.913757	0.843296	0.922508	0.868504	0.959867	0.971608	0.876151	0.923135	0.912473	0.931395	0.942542	0.86388	0.907992	0.733469	0.989295	0.849455	0.905725	0.882078	0.935056	0.915478	0.913321	0.909352	0.842938	0.893587	0.887689	0.808146	0.812883	0.942426	0.85689	0.969779	0.93992	0.845865	0.817141	0.899179	0.890359	0.881715	0.96403	0.905235	0.930712	0.930411	0.936728	0.969325	0.841804	0.947064	0.87851
0.97558	NE		0.922244	0.91658	0.909264	0.861682	0.935719	0.905753	0.964039	0.96916	0.866647	0.925393	0.935365	0.945131	0.960376	0.894704	0.934572	0.765554	0.991588	0.874347	0.902556	0.916248	0.932994	0.934015	0.923729	0.930492	0.820872	0.91288	0.896903	0.803659	0.81477	0.944736	0.830897	0.977715	0.963906	0.867584	0.83231	0.908608	0.897711	0.906417	0.977019	0.910146	0.950285	0.952466	0.942807	0.972556	0.8615	0.947014	0.878553
0.990969	NE		0.930933	0.920901	0.927551	0.878472	0.950522	0.942839	0.968308	0.9648	0.877065	0.933844	0.95025	0.956647	0.967644	0.911842	0.939899	0.826257	0.986292	0.889081	0.906548	0.944381	0.937091	0.924025	0.932096	0.940494	0.810497	0.91802	0.903169	0.812972	0.821242	0.949148	0.810512	0.968728	0.966357	0.889909	0.844157	0.899819	0.910073	0.913246	0.979751	0.907089	0.955131	0.974575	0.95309	0.987289	0.885705	0.962608	0.878453
0.968845	NE		0.939558	0.932901	0.944775	0.891568	0.958891	0.947417	0.98909	0.971195	0.899103	0.928389	0.951553	0.970333	0.961786	0.924481	0.938929	0.881086	0.982509	0.891843	0.896285	0.944471	0.957175	0.911637	0.923835	0.942455	0.818329	0.934224	0.92463	0.813738	0.845975	0.960342	0.787406	0.965838	0.961234	0.895748	0.855965	0.896978	0.930052	0.928926	0.986392	0.916057	0.959445	0.979279	0.966699	0.999631	0.890029	0.963304	0.874361
0.970731	NE		0.931864	0.933434	0.948938	0.888182	0.979732	0.952101	0.996127	0.974822	0.909785	0.932404	0.949764	0.980324	0.9644	0.94971	0.948041	0.911501	0.99142	0.890749	0.90544	0.941463	0.948635	0.913602	0.916547	0.946779	0.821576	0.935538	0.932518	0.809853	0.86993	0.968685	0.7941	0.976725	0.963689	0.906936	0.89744	0.906031	0.937086	0.929751	0.990579	0.941202	0.993383	0.977439	0.95895	0.997762	0.903041	0.972034	0.87816
0.97017	NE		0.928865	0.914591	0.95757	0.849632	0.989734	0.958635	0.993342	0.986567	0.921555	0.934309	0.946412	0.984847	0.961208	0.968831	0.964627	0.950111	0.981784	0.905452	0.91725	0.937984	0.952373	0.904146	0.895602	0.934478	0.838188	0.943118	0.942398	0.813275	0.879751	0.97251	0.80899	0.970112	0.960813	0.915648	0.908978	0.906965	0.948399	0.937336	1	0.965986	0.991951	0.980495	0.960995	0.982064	0.909916	0.972231	0.870218
0.964245	NE		0.932399	0.882425	0.955036	0.825352	0.996791	0.964287	0.986689	0.97847	0.920286	0.932523	0.951663	0.977578	0.96782	0.986856	0.981802	0.940291	0.977646	0.902312	0.920924	0.935269	0.963548	0.912697	0.882626	0.927191	0.852068	0.940168	0.954387	0.809945	0.89438	0.97883	0.831728	0.966011	0.965745	0.92769	0.907052	0.903136	0.943412	0.952246	0.979177	0.984728	0.994635	0.972595	0.959302	0.982214	0.918336	0.974471	0.873773
0.962218	NE		0.927953	0.869804	0.951349	0.775562	1	0.972527	0.987742	0.992932	0.920212	0.928742	0.940522	0.985943	0.952823	1	0.989769	0.933093	0.974729	0.905045	0.922316	0.940873	0.964633	0.912077	0.873721	0.927439	0.872194	0.948743	0.966863	0.829923	0.895114	0.989557	0.866731	0.94975	0.946085	0.924835	0.916708	0.890482	0.943458	0.965302	0.970081	0.976473	1	0.959792	0.955152	0.972433	0.925699	0.965784	0.882113
0.97041	NE		0.923721	0.867989	0.945987	0.744654	0.992465	0.987799	0.981749	0.989143	0.916913	0.920319	0.940193	0.986654	0.933721	0.988923	0.992301	0.912029	0.970651	0.893012	0.919782	0.927348	0.967643	0.894863	0.871797	0.943321	0.891425	0.96127	0.979371	0.842714	0.907624	0.977043	0.884321	0.93267	0.912818	0.925642	0.923964	0.866861	0.94193	0.962211	0.948582	0.952109	0.992176	0.948297	0.95129	0.937839	0.951768	0.961459	0.894916
0.960712	NE		0.915856	0.861463	0.950398	0.738815	0.975898	0.982251	0.982014	0.997907	0.927748	0.902713	0.937329	0.977686	0.92361	0.977047	0.991376	0.892178	0.974043	0.876801	0.926804	0.932456	0.967021	0.885722	0.867389	0.949557	0.904732	0.968969	0.972879	0.842121	0.917868	0.959047	0.891499	0.913776	0.897702	0.923288	0.925223	0.845873	0.940041	0.943167	0.927241	0.935129	0.97911	0.957244	0.936811	0.923656	0.954367	0.930308	0.906376
0.969715	NE		0.904857	0.872673	0.951636	0.764438	0.965458	0.9775	0.979374	0.986307	0.942206	0.878107	0.943892	0.966273	0.905381	0.972142	0.99144	0.870726	0.957077	0.85742	0.911609	0.948414	0.940624	0.884107	0.860433	0.952807	0.909362	0.973891	0.972416	0.83695	0.912021	0.956207	0.892233	0.917761	0.885699	0.919269	0.927486	0.830138	0.936711	0.940995	0.895054	0.920444	0.971968	0.974029	0.928492	0.907731	0.953466	0.896823	0.900564
0.925634	OE		0.863872	0.871455	0.950993	0.838685	0.961825	0.970708	0.970942	0.973963	0.962376	0.86065	0.955576	0.943399	0.888339	0.956513	0.997378	0.846356	0.927957	0.827149	0.892764	0.958233	0.896809	0.877248	0.863713	0.958309	0.898665	0.984004	0.973354	0.833242	0.91273	0.923584	0.894778	0.913231	0.874173	0.92918	0.927722	0.80642	0.934089	0.946053	0.878431	0.897517	0.960696	0.991166	0.932685	0.887774	0.966551	0.867554	0.911388
0.886047	OE		0.837758	0.900589	0.946247	0.89629	0.950034	0.962656	0.952395	0.976916	0.964947	0.838721	0.964278	0.918127	0.884249	0.945202	1	0.828543	0.889328	0.81586	0.892619	0.969844	0.875713	0.869269	0.869614	0.96104	0.890211	0.9858	0.960208	0.808036	0.905313	0.889201	0.884941	0.912488	0.872769	0.936711	0.934778	0.791469	0.918521	0.926423	0.833376	0.871583	0.948736	0.983466	0.923014	0.8656	0.97314	0.844127	0.906357
0.950377	OE		0.819793	0.92374	0.944173	0.913326	0.936137	0.943281	0.935095	0.96662	0.946593	0.828009	0.964319	0.898265	0.862761	0.917977	0.988821	0.830528	0.855823	0.813408	0.871504	0.974341	0.846003	0.864946	0.863109	0.949508	0.884032	0.978976	0.957922	0.789869	0.893141	0.854269	0.876404	0.895038	0.870965	0.948408	0.953953	0.784517	0.902921	0.92373	0.824628	0.861597	0.922626	0.987309	0.924359	0.853699	0.971251	0.828936	0.910617
0.836203	OE		0.816622	0.947998	0.942402	0.906061	0.915382	0.931701	0.927063	0.963594	0.922348	0.820925	0.952979	0.873393	0.845625	0.872033	0.969893	0.832479	0.82584	0.821622	0.861158	0.983254	0.815501	0.865633	0.857501	0.949116	0.872968	0.992556	0.948537	0.782628	0.910521	0.82981	0.867257	0.886656	0.859103	0.946259	0.961495	0.780891	0.89663	0.921564	0.817337	0.846885	0.922256	0.991177	0.913809	0.848126	0.963627	0.827587	0.916526
0.961985	OE		0.825918	0.975918	0.931547	0.891688	0.885702	0.941849	0.899728	0.972283	0.904547	0.824148	0.947028	0.867544	0.840926	0.833169	0.949635	0.837432	0.823737	0.821628	0.840028	0.974139	0.809913	0.857675	0.857396	0.941262	0.854215	1	0.948868	0.780283	0.918594	0.831477	0.854551	0.883076	0.862218	0.93852	0.949965	0.775472	0.883585	0.931455	0.830987	0.854328	0.893747	0.983494	0.897562	0.852169	0.953515	0.840546	0.930943
0.960083	OE		0.84217	0.997047	0.933599	0.876599	0.857929	0.944504	0.870832	0.947336	0.894552	0.823395	0.936592	0.859277	0.837703	0.826548	0.9132	0.849899	0.81069	0.814373	0.820168	0.9768	0.805723	0.849972	0.860153	0.936702	0.846582	0.988978	0.946732	0.790693	0.928288	0.816618	0.869483	0.870066	0.879055	0.942767	0.953089	0.781814	0.882192	0.934313	0.876869	0.867717	0.878586	0.993737	0.886054	0.858082	0.94258	0.845593	0.930361
0.952147	OE		0.885134	0.990035	0.94131	0.875902	0.848699	0.946137	0.839464	0.947181	0.89116	0.828574	0.915741	0.857175	0.832081	0.812607	0.897441	0.837885	0.811714	0.808492	0.825808	0.977684	0.795081	0.839383	0.864353	0.927592	0.843752	0.975754	0.940278	0.786651	0.931612	0.827022	0.899154	0.859097	0.893403	0.96819	0.96032	0.771736	0.873188	0.936748	0.922931	0.869334	0.859612	0.997551	0.864576	0.862996	0.9286	0.844703	0.899464
0.983203	OE		0.912348	0.98349	0.947702	0.875628	0.854539	0.956013	0.823002	0.957855	0.884589	0.84019	0.909388	0.849614	0.847287	0.800962	0.881825	0.843679	0.801837	0.804323	0.823014	0.974279	0.777371	0.830356	0.861738	0.933301	0.840668	0.948021	0.932952	0.797981	0.936746	0.824533	0.908837	0.828001	0.897334	0.964639	0.952632	0.772264	0.86751	0.942868	0.951533	0.862093	0.848915	1	0.835947	0.866032	0.905522	0.836359	0.877148
0.902093	OE		0.9161	0.970353	0.953484	0.877065	0.84778	0.972898	0.822224	0.956304	0.869902	0.835398	0.895695	0.847556	0.836101	0.789888	0.86772	0.840726	0.798925	0.809059	0.813413	0.962426	0.786323	0.825843	0.84503	0.921799	0.843546	0.909801	0.911169	0.81016	0.945022	0.821452	0.942869	0.801264	0.893809	0.9465	0.956128	0.794166	0.864664	0.945447	0.969175	0.848238	0.843018	0.974993	0.817947	0.87688	0.882953	0.847582	0.873123
0.93	OE		0.919656	0.963711	0.940032	0.884292	0.854244	0.984446	0.8423	0.966899	0.868617	0.833197	0.880814	0.848244	0.845334	0.792075	0.863195	0.836221	0.80312	0.806509	0.805911	0.929777	0.787449	0.816349	0.840216	0.93069	0.838575	0.875442	0.869644	0.811821	0.943898	0.813036	0.951952	0.793507	0.902161	0.941399	0.955174	0.79654	0.871278	0.924661	0.971722	0.85207	0.833663	0.951833	0.801309	0.888206	0.85982	0.847762	0.845891
0.945961	OE		0.914988	0.973572	0.921864	0.881315	0.847554	0.994275	0.862987	0.984392	0.860642	0.835704	0.858681	0.858481	0.844375	0.794814	0.856867	0.825249	0.792224	0.816508	0.803063	0.910046	0.819023	0.823492	0.820749	0.942296	0.837336	0.846057	0.848712	0.808655	0.9462	0.808117	0.935874	0.79126	0.904481	0.916256	0.96027	0.794052	0.873367	0.934525	0.979869	0.870597	0.835238	0.917183	0.804189	0.891396	0.849245	0.8527	0.833845
0.973432	OE		0.917151	0.979638	0.892535	0.883832	0.851662	1	0.895443	0.989687	0.850579	0.846455	0.84851	0.85912	0.857503	0.798516	0.866715	0.818243	0.791601	0.821364	0.805036	0.8999	0.830927	0.823286	0.801466	0.943439	0.825566	0.831408	0.82666	0.812676	0.94114	0.81045	0.931849	0.794092	0.910234	0.900575	0.976028	0.80192	0.869341	0.930667	0.977593	0.877424	0.837786	0.899467	0.802384	0.903281	0.826322	0.855649	0.824618
0.95551	OE		0.913634	0.96835	0.871534	0.876515	0.856895	0.999107	0.931656	0.997351	0.845567	0.840417	0.835724	0.866759	0.866719	0.789723	0.864076	0.820084	0.804617	0.811286	0.822009	0.893331	0.849571	0.809324	0.79878	0.946209	0.83191	0.807615	0.84097	0.831665	0.939077	0.796449	0.908495	0.798037	0.91877	0.878128	0.995908	0.810173	0.864096	0.931076	0.968769	0.887097	0.836764	0.890875	0.802823	0.918998	0.832625	0.865332	0.819562
0.928615	OE		0.910196	0.940946	0.863963	0.864542	0.855402	0.996111	0.965138	0.983111	0.846726	0.856331	0.842338	0.872922	0.888445	0.792717	0.854566	0.854888	0.817497	0.811828	0.839553	0.888015	0.858401	0.81597	0.831715	0.935301	0.83509	0.800622	0.859824	0.851901	0.939272	0.782455	0.89115	0.794819	0.913452	0.864803	0.987428	0.813414	0.866926	0.937944	0.952197	0.885868	0.824423	0.881113	0.801333	0.929902	0.826465	0.87601	0.816006
0.931803	OE		0.899019	0.917924	0.863578	0.863089	0.863026	0.997736	0.989526	0.955777	0.85079	0.87745	0.839472	0.874101	0.904091	0.791583	0.851776	0.886406	0.84143	0.82219	0.866915	0.869767	0.857829	0.82739	0.859227	0.915474	0.82959	0.793813	0.883226	0.880152	0.936823	0.776917	0.911753	0.793321	0.913256	0.842906	0.992377	0.818255	0.8664	0.933662	0.941634	0.89024	0.829553	0.852799	0.797472	0.929223	0.831454	0.882114	0.810718
0.803362	OE		0.898957	0.898945	0.845803	0.856952	0.866221	0.986952	1	0.930474	0.853268	0.882594	0.839279	0.880141	0.93799	0.78708	0.857589	0.920373	0.872646	0.826078	0.900106	0.866627	0.844713	0.853286	0.905828	0.896151	0.829838	0.791667	0.8844	0.910725	0.922382	0.781893	0.903757	0.80256	0.909416	0.838698	0.988143	0.834812	0.873485	0.945624	0.930706	0.910315	0.827301	0.862847	0.793454	0.931537	0.836541	0.883872	0.825086
0.986656	OE		0.886795	0.876155	0.852449	0.85001	0.879645	0.98587	0.980711	0.912981	0.855343	0.910081	0.845375	0.874889	0.967291	0.800152	0.874367	0.938853	0.900175	0.835068	0.935234	0.86547	0.848089	0.868929	0.957577	0.869863	0.84007	0.787492	0.876666	0.935146	0.900456	0.780225	0.895286	0.823623	0.91348	0.832427	0.995339	0.83635	0.874929	0.935299	0.908923	0.94154	0.807302	0.856976	0.786818	0.951269	0.822717	0.903849	0.810607
0.89398	OE		0.880568	0.877727	0.850662	0.853422	0.886305	0.970521	0.959313	0.883188	0.860741	0.924865	0.852785	0.896269	0.990143	0.826941	0.901923	0.9538	0.910577	0.843888	0.963602	0.862009	0.845025	0.895509	0.979138	0.842964	0.855303	0.778621	0.855223	0.955066	0.895372	0.775731	0.903624	0.825185	0.899048	0.828366	0.983175	0.82845	0.867629	0.918206	0.910838	0.982143	0.799805	0.85531	0.788104	0.969651	0.83323	0.913682	0.798093
0.911388	OE		0.877495	0.860943	0.843803	0.855927	0.891667	0.951412	0.929601	0.866694	0.8517	0.952405	0.848126	0.915574	1	0.852304	0.915579	0.97886	0.922316	0.849624	0.9868	0.873249	0.845373	0.903912	0.987689	0.831644	0.875475	0.78383	0.822606	0.959293	0.870094	0.774066	0.897604	0.840857	0.900223	0.823634	0.96352	0.840685	0.873102	0.924747	0.906962	0.986043	0.797196	0.840946	0.798797	1	0.849507	0.938383	0.797732
0.947196	OE		0.881805	0.856621	0.850348	0.876409	0.900287	0.931121	0.909766	0.855575	0.870726	0.977739	0.846359	0.933074	0.999065	0.879781	0.911563	0.996815	0.934144	0.876541	0.993987	0.866699	0.840065	0.911034	0.994887	0.821511	0.894191	0.77397	0.802747	0.965722	0.856961	0.809946	0.889216	0.844312	0.907872	0.832966	0.961219	0.862427	0.882342	0.919088	0.899649	1	0.805533	0.842968	0.815321	0.999518	0.85033	0.961993	0.803828
0.930485	OE		0.875456	0.852131	0.850973	0.894934	0.92043	0.901721	0.884571	0.847085	0.900223	0.990627	0.852951	0.956633	0.988496	0.895303	0.913362	0.994734	0.936622	0.880679	0.983933	0.861191	0.82606	0.919876	1	0.816675	0.92345	0.778389	0.802552	0.976436	0.850446	0.852704	0.901273	0.87423	0.905387	0.8312	0.961548	0.903933	0.883259	0.913906	0.896277	0.999033	0.817593	0.834205	0.826101	0.989264	0.856156	0.973629	0.81114
0.916028	OE		0.868016	0.856502	0.845961	0.923034	0.947764	0.885815	0.865032	0.844493	0.920792	0.989236	0.855745	0.965989	0.979433	0.90089	0.936013	0.970338	0.961331	0.883591	0.979328	0.878882	0.821426	0.933715	0.986135	0.815666	0.9506	0.780447	0.816598	0.988191	0.851541	0.900552	0.899625	0.890011	0.910458	0.821044	0.972961	0.93886	0.89602	0.9241	0.898536	0.990945	0.827195	0.834074	0.840226	0.993573	0.860551	0.986189	0.818869
0.912537	OE		0.863379	0.858544	0.853787	0.939356	0.974944	0.883591	0.84868	0.829432	0.938689	0.996818	0.8709	0.977864	0.971475	0.906694	0.937791	0.961051	0.978813	0.890194	0.980302	0.884993	0.826381	0.951057	0.989118	0.831507	0.973308	0.8102	0.839277	0.994748	0.849447	0.940779	0.882409	0.91544	0.92311	0.810427	0.967658	0.972727	0.902137	0.927093	0.897201	0.988425	0.845256	0.837369	0.874489	0.98726	0.863849	0.985556	0.821439
0.943726	OE		0.871619	0.855654	0.862036	0.931097	0.987462	0.886355	0.852596	0.822617	0.951846	1	0.869217	0.97136	0.979114	0.930882	0.940911	0.942689	0.980178	0.918138	0.984764	0.896685	0.821552	0.960937	0.986952	0.840393	0.98138	0.811322	0.840811	1	0.851204	0.97356	0.879575	0.932918	0.941568	0.811331	0.960304	0.992418	0.915088	0.934782	0.887959	0.979373	0.872352	0.845609	0.916369	0.971266	0.872997	0.996426	0.842009
0.851126	OE		0.863728	0.861262	0.859688	0.936809	0.988643	0.876772	0.851087	0.82389	0.966048	0.991437	0.86695	0.981227	0.991008	0.948378	0.947095	0.937331	0.996533	0.943041	0.991972	0.908979	0.813002	0.960762	0.978629	0.849434	0.990423	0.845448	0.830983	0.999091	0.857903	0.986015	0.878029	0.966133	0.965969	0.810441	0.959214	1	0.943046	0.952163	0.881186	0.957174	0.897482	0.834716	0.952922	0.967964	0.892822	1	0.880985
0.943756	OE		0.855162	0.856298	0.854036	0.928694	0.986423	0.875179	0.851588	0.825191	0.977252	0.985794	0.856867	0.991796	0.999888	0.961562	0.949317	0.944838	1	0.960979	0.987536	0.910101	0.820033	0.956476	0.962518	0.840155	0.998816	0.89042	0.834222	0.994499	0.870273	0.994528	0.883784	0.977999	0.974522	0.816125	0.946442	0.980448	0.956147	0.983787	0.896166	0.956282	0.922864	0.853517	0.972633	0.978028	0.926016	0.988898	0.90869
0.940749	NE		0.876808	0.857486	0.86433	0.940658	0.977375	0.869791	0.857435	0.822653	0.988681	0.98317	0.829825	0.988296	0.986905	0.963981	0.958002	0.975053	0.989624	0.97306	0.981741	0.901799	0.819486	0.948216	0.94134	0.828045	1	0.934359	0.837515	0.982932	0.878186	0.997608	0.890918	0.975192	0.990121	0.823915	0.92003	0.975777	0.963026	0.984449	0.899828	0.958693	0.923939	0.861712	0.986085	0.982276	0.956487	0.988586	0.932177
0.992035	NE		0.913392	0.84989	0.861193	0.931958	0.969096	0.871235	0.863059	0.827772	0.992996	0.986048	0.836552	0.988637	0.980566	0.957127	0.945651	0.990774	0.996404	0.98952	0.970595	0.909043	0.82237	0.947244	0.935741	0.83093	0.99744	0.949446	0.825595	0.984784	0.874561	0.999762	0.904964	0.978756	1	0.820084	0.899765	0.984945	0.967827	0.99892	0.900561	0.959475	0.944576	0.889297	0.9966	0.979322	0.985627	0.988766	0.938604
0.970596	NE		0.935635	0.852793	0.860915	0.935243	0.953988	0.869028	0.864108	0.831283	0.988575	0.982598	0.837824	0.997967	0.97838	0.944624	0.921572	0.99409	0.972446	0.996924	0.948491	0.900065	0.816096	0.952816	0.941228	0.82941	0.988089	0.947437	0.829618	0.990055	0.881477	1	0.925221	0.983746	0.998909	0.831575	0.895533	0.994697	0.974735	1	0.910864	0.971384	0.960884	0.928486	0.995585	0.978175	0.993696	0.984727	0.939601
0.990465	NE		0.953693	0.855521	0.878795	0.943407	0.93474	0.865184	0.866132	0.830866	0.983611	0.996472	0.854914	0.994342	0.966623	0.94716	0.893366	1	0.93633	0.995149	0.96531	0.910275	0.818267	0.967705	0.949931	0.828433	0.975656	0.949276	0.834932	0.980111	0.870955	0.988829	0.94636	0.997893	0.994398	0.856567	0.864545	0.980278	0.982147	0.990349	0.931438	0.973566	0.950165	0.937414	1	0.963645	0.994706	0.978323	0.955491
0.984899	NE		0.962252	0.872299	0.900838	0.964579	0.910094	0.861801	0.875808	0.845219	0.983549	0.993842	0.879189	0.997825	0.933703	0.942979	0.882081	0.996605	0.909664	0.984132	0.965595	0.914787	0.826016	0.965979	0.955923	0.827704	0.969059	0.954493	0.840656	0.968234	0.872891	0.982763	0.953988	0.999676	0.985008	0.887412	0.8374	0.958597	0.980892	0.968741	0.951281	0.984346	0.954373	0.967581	0.996679	0.953825	1	0.968642	0.959032
0.98792	NE		0.953884	0.889373	0.912525	0.973392	0.881658	0.861696	0.883518	0.860129	0.969058	0.996845	0.892876	1	0.902921	0.941578	0.894052	0.979034	0.88679	0.991208	0.965323	0.935018	0.826679	0.975445	0.954835	0.831574	0.959882	0.948305	0.84681	0.931899	0.86589	0.980827	0.978444	0.98978	0.966734	0.910884	0.831428	0.947039	0.991533	0.946825	0.951278	0.989408	0.940366	0.981557	0.995679	0.934553	0.991195	0.939403	0.961905
0.976978	NE		0.949283	0.910929	0.932902	0.979788	0.856402	0.865897	0.891562	0.875286	0.988364	0.982194	0.924578	0.992519	0.855079	0.937925	0.896335	0.959921	0.856523	1	0.969478	0.953869	0.831177	0.992311	0.948598	0.83763	0.946608	0.966095	0.848969	0.89185	0.884185	0.983465	0.982282	0.998484	0.955038	0.931356	0.834288	0.941914	1	0.924907	0.964749	0.959199	0.928528	0.992068	0.991092	0.905125	0.966305	0.888416	0.957358
0.978749	NE		0.953987	0.927866	0.953524	0.989575	0.831657	0.872829	0.896151	0.909028	0.992372	0.96415	0.958692	0.995834	0.785434	0.888845	0.898488	0.90524	0.811767	0.991576	0.978624	0.970305	0.842372	1	0.942603	0.849515	0.947278	0.96785	0.848533	0.850691	0.887517	0.988186	0.985753	1	0.938755	0.959777	0.825564	0.904375	0.995175	0.904425	0.961878	0.94494	0.920294	0.989667	0.99248	0.863	0.963565	0.838551	0.962664
0.951048	NE		0.97552	0.946097	0.982808	0.999296	0.783354	0.872632	0.906351	0.944577	1	0.950762	0.984841	0.985441	0.668399	0.814502	0.863424	0.845618	0.74845	0.983237	0.987348	0.982892	0.847399	0.995152	0.924092	0.868013	0.95522	0.961957	0.852797	0.771151	0.907907	0.98547	0.987728	0.986866	0.927666	0.972003	0.833184	0.891228	0.978664	0.889848	0.955959	0.929598	0.935792	0.98112	0.984855	0.80685	0.949357	0.807776	0.967133
0.985859	NE		0.988861	0.95594	1	1	0.73086	0.876998	0.910485	0.972922	0.996817	0.939145	1	0.985345	0.510782	0.718971	0.801551	0.763303	0.637399	0.985529	0.987426	0.983995	0.865665	0.994236	0.897818	0.882453	0.965313	0.974177	0.861976	0.672685	0.923212	0.979111	1	0.975251	0.927917	0.975071	0.826348	0.891691	0.973234	0.871233	0.947677	0.912931	0.947176	0.976818	0.983212	0.713965	0.958107	0.801765	0.959878
0.971615	NE		1	0.975869	0.993234	0.999453	0.664736	0.870627	0.925194	0.97478	0.994988	0.92862	0.995316	0.977717	0.300584	0.656032	0.721379	0.621365	0.465424	0.989086	0.992455	0.983497	0.882472	0.995894	0.856496	0.895685	0.966679	0.975434	0.860009	0.522906	0.953306	0.970867	0.993031	0.984291	0.921181	0.981591	0.829802	0.876549	0.951126	0.831928	0.937618	0.893809	0.947617	0.98179	0.969688	0.58531	0.945557	0.788946	0.953781
0.962024	NE		0.99708	0.985939	0.987055	0.989282	0.570744	0.880521	0.955654	0.984548	0.987829	0.901464	0.983816	0.967328	0.112652	0.628553	0.591958	0.409481	0.250585	0.967413	1	0.965291	0.875777	0.978741	0.796766	0.892936	0.958342	0.980656	0.87349	0.337231	0.97582	0.9576	0.980354	0.969012	0.900203	0.992059	0.824644	0.844312	0.943541	0.820915	0.92548	0.879113	0.94128	0.963327	0.959288	0.426576	0.945587	0.759863	0.945248
0.922317	NE		0.990838	0.988965	0.970531	0.976456	0.433632	0.878798	0.964993	0.998361	0.96873	0.855599	0.975489	0.968987	0	0.6271	0.403386	0.17952	0.0614863	0.945703	0.989645	0.984083	0.872549	0.955983	0.697784	0.909808	0.946761	0.983245	0.879489	0.161641	0.987038	0.943984	0.974047	0.976604	0.881611	1	0.820601	0.781674	0.939646	0.814946	0.900393	0.839186	0.935178	0.967222	0.944473	0.222672	0.944456	0.691115	0.963716
0.965846	NE		0.978891	0.990832	0.965644	0.964296	0.268348	0.91264	0.977158	0.993261	0.943365	0.763876	0.955647	0.942655		0.60581	0.179201			0.93413	0.968132	0.992386	0.875483	0.931293	0.557757	0.921079	0.937958	0.980909	0.885087	0.0497803	1	0.915245	0.982452	0.981288	0.850359	0.990855	0.812156	0.658512	0.934821	0.827336	0.895485	0.771747	0.931416	0.972657	0.931485	0.0649513	0.94377	0.578906	0.979788
0.939428	NE		0.979363	0.988984	0.959228	0.941816	0.128813	0.948873	0.981769	0.961842	0.900259	0.599335	0.965728	0.923181		0.564547	0			0.928951	0.954539	0.991011	0.892016	0.880635	0.367173	0.946491	0.934879	0.971906	0.895851	0	0.994176	0.877611	0.967978	0.983123	0.824665	0.991598	0.796434	0.468528	0.946402	0.829381	0.9089	0.64795	0.929802	0.963005	0.906485	0	0.940797	0.406995	0.987692
0.950523	NE		0.963659	0.993781	0.957673	0.919775	0.0435142	0.965048	0.979041	0.951689	0.858906	0.376747	0.965869	0.91479		0.436217				0.910766	0.944851	1	0.933885	0.830035	0.183766	0.963791	0.920921	0.960153	0.91586		0.999485	0.819448	0.960091	0.970535	0.774997	0.978563	0.792335	0.222939	0.955108	0.79748	0.915719	0.456946	0.919968	0.954635	0.87372		0.93974	0.223765	0.99399
0.992448	NE		0.952621	1	0.956975	0.889068	0	0.965328	0.97493	0.965468	0.786181	0.1652	0.952178	0.898435		0.236531				0.891074	0.920056	0.985192	0.966182	0.788393	0.0724353	0.966246	0.897542	0.945913	0.925537		0.990869	0.758706	0.971911	0.94962	0.708986	0.970201	0.799834	0.0329627	0.938063	0.703788	0.948245	0.23073	0.904926	0.929509	0.849812		0.930152	0.0914716	1
0.979956	NE		0.932121	0.999879	0.944509	0.862991		0.981885	0.979635	0.979522	0.671805	0.0432522	0.918419	0.877413		0				0.853922	0.889307	0.969437	0.982073	0.694182		0.967914	0.880935	0.929309	0.939062		0.99477	0.668159	0.947565	0.931887	0.600306	0.962932	0.815602		0.916814	0.562634	0.943076	0.0696269	0.868381	0.919613	0.818702		0.922218	0.0246402	0.995493
0.939673	NE		0.905708	0.990963	0.944074	0.831004		0.986928	0.985822	0.996928	0.51068	0	0.87127	0.849128						0.785265	0.819941	0.96492	0.985477	0.557113		0.959537	0.83936	0.912814	0.955936		0.993843	0.54405	0.906399	0.92487	0.45429	0.973341	0.827168		0.884461	0.398223	0.936467	0	0.846537	0.92563	0.776574		0.926842		0.987585
0.989389	NE		0.873086	0.99383	0.944934	0.76359		0.97803	0.986501	1	0.299632		0.800276	0.80858						0.678739	0.72037	0.971651	0.993683	0.365451		0.953281	0.804047	0.892064	0.966287		0.990562	0.38228	0.895423	0.893234	0.265648	0.9693	0.86353		0.846402	0.241018	0.931621		0.834315	0.952059	0.681457		0.948712		0.963111
0.964988	NE		0.853444	0.993389	0.951884	0.655196		0.986333	0.987636	0.983279	0.111266		0.732544	0.729354						0.504866	0.562761	0.969627	1	0.159705		0.953374	0.760078	0.87744	0.967857		0.971651	0.201055	0.867619	0.845783	0.115858	0.971947	0.905422		0.785745	0.117575	0.920946		0.825221	0.970372	0.542992		0.96037		0.951195
0.925489	NE		0.819313	0.976545	0.950025	0.501088		0.99024	0.978207	0.984825	0		0.639064	0.597749						0.292221	0.362308	0.967412	0.998584	0		0.955304	0.688707	0.854645	0.977744		0.948931	0.0703888	0.83875	0.770606	0.0341972	0.949126	0.931217		0.71811	0.0448414	0.93264		0.766174	0.992584	0.384031		0.970394		0.929149
0.991756	NE		0.788134	0.962282	0.962955	0.3105		0.979139	0.97086	0.9769			0.509434	0.426213						0.123018	0.156171	0.951906	0.979625			0.95317	0.578658	0.822942	0.990183		0.960197		0.795509	0.6942	0.000631554	0.936122	0.967595		0.622949	0	0.945826		0.713536	0.99679	0.197284		0.950903		0.903788
0.986112	NE		0.743377	0.937388	0.960715	0.143217		0.975933	0.965075	0.971719			0.350286	0.236683						0.0343914	0.00946807	0.956437	0.980595			0.954465	0.431205	0.774515	1		0.948798		0.716133	0.58392		0.928228	0.991172		0.496306		0.962965		0.616678	0.983521	0.0682248		0.948444		0.848896
0.990663	NE		0.666304	0.910482	0.956378	0.0448533		0.971572	0.955186	0.970098			0.18729	0.0796001						0		0.958057	0.979507			0.944294	0.261418	0.690788	0.993721		0.953953		0.633093	0.413375		0.898889	0.977193		0.354439		0.962204		0.482836	0.966437	0.00936346		0.951374		0.78392
0.952571	NE		0.55639	0.870835	0.949209	0		0.95908	0.956947	0.963834			0.066903									0.968564	0.982311			0.94791	0.1213	0.547373	0.98955		0.972655		0.52307	0.220796		0.87687	1		0.216914		0.952475		0.292533	0.971764			0.930751		0.673817
0.961157	NE		0.40081	0.832986	0.939794			0.959526	0.949641	0.96928			0									0.965149	0.970291			0.959069	0.0331412	0.336967	0.969		0.954588		0.358444	0.0821852		0.848718	0.992984		0.101518		0.924193		0.117016	0.982067			0.921518		0.535566
0.968775	NE		0.250248	0.765121	0.93466			0.955228	0.951722	0.957144												0.95347	0.963337			0.954579		0.131907	0.960141		0.941778		0.186832	0		0.833343	0.976098		0.0344042		0.908001		0.00939233	0.991723			0.921875		0.381249
0.977524	NE		0.127241	0.669741	0.935115			0.961821	0.960282	0.952018												0.946297	0.939724			0.958162		0	0.949646		0.926838		0.0639666			0.814193	0.962538		0		0.869237			0.981141			0.906577		0.219596
0.936398	NE		0.06209	0.536325	0.935753			0.963125	0.958209	0.939934												0.940785	0.887378			0.962583			0.934999		0.89533		0			0.7907	0.944569				0.821134			0.967141			0.874334		0.0959347
0.929795	NE		0.0288618	0.378286	0.932496			0.972253	0.963403	0.927731												0.936498	0.813119			0.959472			0.915685		0.891386					0.740123	0.95181				0.79539			0.929842			0.849369		0.0289052
0.960622	NE		0.012648	0.215969	0.914513			0.977797	0.958179	0.926074												0.925404	0.734689			0.957959			0.905807		0.86892					0.709754	0.952971				0.759298			0.899696			0.806718		0
0.979641	NE			0.107737	0.904839			0.96958	0.94836	0.916833												0.895602	0.660411			0.962672			0.893632		0.861445					0.665841	0.956852				0.697019			0.84288			0.760341
0.972092	NE			0.0504944	0.883586			0.957713	0.944445	0.890692												0.876461	0.601716			0.967754			0.895313		0.845057					0.588911	0.953049				0.619085			0.767386			0.661307
0.992565	NE			0.0222633	0.85836			0.93727	0.928786	0.861369												0.865795	0.541759			0.981861			0.89379		0.822219					0.470496	0.961885				0.505811			0.681328			0.528024
0.979515	NE			0.00659236	0.801107			0.920636	0.90946	0.824992												0.835473	0.507617			0.983177			0.893628		0.817567					0.310596	0.961111				0.363551			0.567143			0.365761
0.974445	NE			0	0.708924			0.912228	0.895364	0.775685												0.812434	0.493538			0.987022			0.898684		0.793152					0.146704	0.950168				0.219471			0.407422			0.20261
0.981164	NE				0.582741			0.925167	0.873176	0.699633												0.773262	0.501762			0.999268			0.897079		0.748048					0.0470156	0.942253				0.0970075			0.193471			0.084955
0.960056	OE				0.389707			0.937674	0.843223	0.583046												0.71066	0.481871			0.987754			0.880933		0.715281					0.00264117	0.938781				0			0			0.0256706
0.810119	OE				0.197039			0.961642	0.794184	0.410483												0.590768	0.393128			0.985516			0.859635		0.696136						0.935035
0.905413	OE				0.0647076			0.950311	0.735535	0.198036												0.431528	0.229265			0.993799			0.840412		0.650514						0.944065
0.966258	OE				0			0.920194	0.684281	0.0113231												0.229556	0.0705459			0.990939			0.825583		0.582167						0.966462
0.840836	OE							0.90323	0.612388													0.0235107				0.988033			0.800299		0.482352						0.967712
0.955451	OE							0.880438	0.506187																	0.991472			0.784501		0.32208						0.935209
0.961119	OE							0.870271	0.370037																	1			0.794838		0.13138						0.926304
0.923244	OE							0.859988	0.212218																	0.995282			0.798133		0						0.909386
0.949418	OE							0.845958	0.0919246																	0.988401			0.803525								0.906383
0.902959	OE							0.817706	0.0277751																	0.976114			0.772508								0.900303
0.936806	OE							0.76749	0.00713446																	0.966641			0.729582								0.894363
0.933318	OE							0.701331	0.00503244																	0.953972			0.674488								0.884179
0.935836	OE							0.611155																		0.928968			0.592495								0.863958
0.93292	OE							0.476562																		0.898561			0.476772								0.831694
0.983229	OE							0.307319																		0.854781			0.327373								0.822054
0.971614	OE							0.134919																		0.810473			0.174083								0.819285
0.956036	OE							0.0394939																		0.749126			0.0631251								0.813784
0.981107	OE																									0.668259			0.0106636								0.813495
0.939587	OE																									0.544956											0.80231
0.962675	OE																									0.389713											0.803553
0.88506	OE																									0.212726											0.795288
0.93646	OE																									0.0783726											0.760968
0.870111	OE																									0											0.729557
0.940355	OE																																				0.685381
0.903354	OE																																				0.630458
0.961757	OE																																				0.552035
0.961567	OE																																				0.422597
0.955921	OE																																				0.253947
0.900779	OE																																				0.0999185
0.882473	OE																																				0
0.961609	OE
0.832804	OE
0.882822	OE
0.952665	OE
0.93714	OE
0.940243	OE
0.972059	OE
0.87186	OE
RNAse			Profile intensity
Intensity	Condition		Value 0	Value 1	Value 2	Value 3	Value 4	Value 5	Value 6	Value 7	Value 8	Value 9	Value 10	Value 11	Value 12	Value 13	Value 14	Value 15	Value 16	Value 17	Value 18	Value 19	Value 20	Value 21	Value 22	Value 23	Value 24	Value 25	Value 26	Value 27	Value 28	Value 29	Value 30	Value 31	Value 32	Value 33	Value 34	Value 35	Value 36	Value 37	Value 38	Value 39	Value 40	Value 41	Value 42	Value 43	Value 0	Value 1	Value 2
0.968437	NE		0	0.0253499	0.00434698	0.00203029	0.0334236	0.0491776	0.00565128	0	0.0611334	0.0272858	0	0.0469183	0.1126	0.002717	0	0	0.0468098	0	0.00876301	0.0425132	0.00102767	0	0	0.070739	0.0952338	0	0	0	0	0.0463145	0	0	0	0	0.106799	0	0	0.000415415	0	0	0.00151606	0.00808937	0	0	0	0.0129075	0
0.934164	NE		0.0153301	0.0708659	0.0530632	0.0660056	0.102258	0.183267	0.0768179	0.167586	0.193435	0.102763	0.0694851	0.174745	0.266386	0.0898976	0.0516399	0.0876812	0.143773	0.0583947	0.148014	0.17202	0.113987	0.0419046	0.115716	0.177058	0.230047	0.0879733	0.183534	0.0186072	0.045481	0.119661	0.0877324	0.146229	0.0516245	0.0695644	0.22693	0.160881	0.159178	0.0800744	0.0545696	0.0460475	0.0302599	0.0301944	0.0497966	0.0805724	0.0407706	0.119076	0.118179
0.949488	NE		0.0522173	0.150619	0.150321	0.17063	0.23401	0.326029	0.19505	0.339838	0.315993	0.208764	0.191483	0.291849	0.424115	0.208725	0.155247	0.231507	0.293024	0.171317	0.330125	0.318154	0.258815	0.133479	0.289203	0.272051	0.350412	0.190028	0.378832	0.0658936	0.125824	0.226398	0.225557	0.329466	0.144428	0.185925	0.367278	0.327587	0.319033	0.210378	0.164357	0.13319	0.0961227	0.0789434	0.144793	0.212494	0.114116	0.257461	0.245321
0.942896	NE		0.134555	0.245677	0.277716	0.282424	0.384618	0.441346	0.314399	0.480007	0.389073	0.322144	0.335346	0.389213	0.554555	0.321048	0.306844	0.392928	0.442129	0.320278	0.490628	0.431164	0.375717	0.278694	0.453442	0.339815	0.443489	0.2688	0.556075	0.154687	0.239975	0.323719	0.370156	0.501039	0.271538	0.319233	0.496861	0.450145	0.44802	0.348252	0.327685	0.268175	0.194929	0.175533	0.284601	0.366497	0.205758	0.386928	0.349279
0.926978	NE		0.280358	0.324073	0.398735	0.363877	0.521558	0.517333	0.417893	0.594181	0.4348	0.426065	0.476418	0.469394	0.628964	0.405244	0.473573	0.529509	0.567426	0.474476	0.590485	0.502335	0.440847	0.438113	0.571832	0.372928	0.521187	0.316798	0.669947	0.280953	0.364252	0.396665	0.477538	0.62572	0.386765	0.427094	0.600971	0.52765	0.543056	0.44056	0.490437	0.415912	0.307588	0.306237	0.432325	0.50757	0.27752	0.49129	0.420086
0.85687	NE		0.443784	0.381871	0.497697	0.416879	0.610099	0.567384	0.486344	0.702917	0.495308	0.512276	0.583469	0.542119	0.67699	0.466371	0.599281	0.62105	0.666117	0.601406	0.653577	0.549585	0.466236	0.570303	0.658827	0.372952	0.575441	0.346045	0.723956	0.40273	0.471925	0.450043	0.528496	0.730917	0.474118	0.516462	0.671327	0.584194	0.605328	0.510808	0.605678	0.556166	0.390047	0.432332	0.561383	0.611955	0.324199	0.591514	0.433861
0.941519	NE		0.577594	0.416668	0.554358	0.45998	0.665174	0.603238	0.528813	0.797298	0.579778	0.579156	0.661051	0.596741	0.708558	0.513597	0.678613	0.686883	0.752783	0.693296	0.700907	0.607139	0.485287	0.66563	0.736593	0.363826	0.627155	0.397348	0.744675	0.511268	0.560771	0.48103	0.539631	0.825026	0.547978	0.597999	0.718433	0.643982	0.647966	0.562446	0.670628	0.667092	0.445549	0.523725	0.648067	0.70418	0.366254	0.660119	0.397492
0.909281	NE		0.674196	0.43829	0.590245	0.487337	0.700544	0.637644	0.557396	0.854289	0.681456	0.624169	0.72122	0.641255	0.748632	0.561589	0.72174	0.716302	0.793815	0.745896	0.748195	0.667535	0.494901	0.733944	0.791775	0.369982	0.668628	0.455616	0.765919	0.599896	0.629234	0.52101	0.552786	0.885548	0.617006	0.67093	0.755222	0.72608	0.690485	0.59081	0.704305	0.738439	0.498561	0.588624	0.677193	0.761233	0.399719	0.720396	0.365042
0.903196	NE		0.751086	0.445358	0.631706	0.513866	0.714786	0.674303	0.570282	0.88906	0.790782	0.661619	0.756916	0.682616	0.789947	0.594465	0.759836	0.755582	0.845494	0.779357	0.798608	0.701607	0.500562	0.77552	0.830055	0.390097	0.710937	0.532203	0.789865	0.688649	0.700703	0.570248	0.584901	0.917189	0.687494	0.729066	0.796834	0.776267	0.727802	0.609734	0.698169	0.8025	0.562256	0.642588	0.692553	0.792418	0.432826	0.776365	0.373463
0.982386	NE		0.806968	0.448312	0.690554	0.536345	0.724124	0.71293	0.584926	0.905508	0.857597	0.686279	0.786281	0.715242	0.840374	0.622131	0.800703	0.785574	0.886301	0.79043	0.825794	0.715476	0.513498	0.805712	0.855273	0.422689	0.736501	0.605304	0.810553	0.750416	0.750677	0.64569	0.622947	0.928272	0.756796	0.76778	0.830229	0.78501	0.777503	0.639338	0.68411	0.852683	0.638271	0.689729	0.718657	0.79724	0.471859	0.832568	0.427504
0.990147	NE		0.846865	0.467935	0.750662	0.587956	0.736338	0.744381	0.634073	0.938391	0.909096	0.706147	0.800043	0.735906	0.889841	0.656845	0.851239	0.810851	0.89257	0.77986	0.831134	0.704879	0.533592	0.822753	0.853084	0.479802	0.778581	0.680795	0.824733	0.788328	0.776348	0.724488	0.653886	0.925867	0.806302	0.797234	0.859922	0.777538	0.830108	0.66671	0.669596	0.907796	0.706768	0.729498	0.756124	0.803322	0.516593	0.883445	0.523333
0.942019	NE		0.868917	0.499915	0.80172	0.642815	0.757942	0.774708	0.703568	0.976671	0.943609	0.741409	0.805133	0.764953	0.941797	0.680945	0.894445	0.829006	0.913572	0.762974	0.84408	0.699248	0.570485	0.852623	0.842045	0.539639	0.792995	0.735138	0.861953	0.806059	0.777531	0.807185	0.687808	0.929511	0.831313	0.83199	0.864949	0.776148	0.854895	0.687424	0.672519	0.943329	0.784449	0.756199	0.784674	0.796392	0.567079	0.907459	0.628048
0.945943	NE		0.865328	0.546458	0.841285	0.697849	0.76928	0.81534	0.762939	0.998348	0.963978	0.798309	0.809154	0.812141	0.971144	0.721006	0.922414	0.829772	0.924031	0.762016	0.864192	0.694614	0.643997	0.881042	0.855356	0.587009	0.804891	0.768115	0.916115	0.82958	0.774167	0.881882	0.722183	0.91622	0.837017	0.839527	0.868739	0.795366	0.88853	0.699199	0.659595	0.976488	0.838259	0.772211	0.790291	0.808217	0.621589	0.924896	0.69845
0.977554	NE		0.858255	0.598761	0.853937	0.745677	0.788751	0.839639	0.817919	0.999314	0.96942	0.85858	0.818619	0.842179	0.97697	0.791523	0.950248	0.835285	0.931602	0.779489	0.893471	0.713255	0.731615	0.89481	0.881073	0.622136	0.805966	0.789647	0.94138	0.847018	0.763385	0.951096	0.737705	0.888337	0.830112	0.84309	0.870234	0.827881	0.927232	0.69961	0.630983	0.991573	0.86341	0.780196	0.798858	0.815094	0.688686	0.926741	0.755802
0.957587	NE		0.859719	0.660193	0.854183	0.777409	0.822288	0.869931	0.842032	0.988292	0.981175	0.907243	0.825392	0.857844	0.949682	0.86102	0.963067	0.852377	0.930753	0.819213	0.916133	0.743736	0.808005	0.898234	0.907562	0.656248	0.815425	0.814033	0.956386	0.859901	0.75576	0.983873	0.749414	0.867262	0.830823	0.854046	0.873018	0.848656	0.947678	0.688532	0.607815	0.998912	0.877697	0.788378	0.805867	0.813259	0.746713	0.943625	0.78518
0.8194	NE		0.860375	0.729933	0.847171	0.807616	0.855581	0.894171	0.851678	0.987968	0.980941	0.919943	0.837302	0.855148	0.908436	0.903903	0.957484	0.870075	0.929616	0.853754	0.947024	0.787695	0.856338	0.903111	0.932675	0.709508	0.821751	0.819877	0.963843	0.873234	0.744681	1	0.734098	0.847126	0.83703	0.843559	0.899672	0.859978	0.957198	0.689355	0.614086	0.999595	0.888235	0.817254	0.805104	0.834793	0.795536	0.941522	0.81303
0.974606	NE		0.850145	0.785882	0.838627	0.821614	0.893803	0.939768	0.861535	0.999008	0.972311	0.932898	0.833726	0.855754	0.871165	0.918599	0.936233	0.911171	0.926057	0.873736	0.98044	0.802898	0.884599	0.902993	0.937242	0.779238	0.84067	0.833837	0.955821	0.880519	0.747832	0.989869	0.723297	0.833077	0.836856	0.83461	0.912256	0.844665	0.969844	0.714369	0.654819	1	0.906555	0.856115	0.818453	0.881393	0.837896	0.943898	0.845593
0.958361	NE		0.858737	0.833671	0.824187	0.834409	0.925983	0.964332	0.875115	1	0.989634	0.947058	0.82107	0.863618	0.826478	0.910144	0.910518	0.929431	0.929904	0.871351	0.997689	0.803558	0.895952	0.916176	0.897564	0.844192	0.850034	0.85204	0.952544	0.868934	0.740536	0.984189	0.699779	0.83269	0.827598	0.850098	0.919081	0.82626	0.988471	0.766804	0.698949	0.991917	0.927876	0.884699	0.827498	0.909988	0.864445	0.949355	0.858144
0.865644	NE		0.881588	0.86005	0.830974	0.855056	0.938376	0.987014	0.894721	0.984011	0.997676	0.964198	0.793103	0.86257	0.7946	0.909844	0.896435	0.966296	0.934049	0.8411	1	0.791798	0.903214	0.917229	0.811471	0.896313	0.845068	0.863961	0.978043	0.860656	0.732159	0.96595	0.684323	0.848384	0.818498	0.858804	0.919898	0.794458	1	0.80556	0.747829	0.976173	0.946086	0.909554	0.813714	0.925094	0.879032	0.967222	0.866018
0.89557	NE		0.905617	0.878845	0.842265	0.876923	0.9307	0.999881	0.905722	0.927589	0.991818	0.966196	0.769612	0.844022	0.756777	0.92838	0.868822	0.997962	0.932004	0.814748	0.959938	0.78918	0.891806	0.929411	0.719401	0.929367	0.827009	0.876513	1	0.863345	0.712162	0.944613	0.685783	0.868435	0.819226	0.892384	0.888211	0.7879	0.9841	0.81494	0.794444	0.949371	0.933192	0.91195	0.778694	0.938307	0.900924	0.988514	0.88675
0.943135	NE		0.925041	0.906839	0.842385	0.896063	0.908539	0.999509	0.920321	0.854069	1	0.969033	0.751842	0.795942	0.725775	0.928715	0.849158	1	0.931115	0.792943	0.931887	0.790861	0.896495	0.943156	0.655403	0.948486	0.816025	0.897462	0.992153	0.865595	0.670923	0.921642	0.692858	0.898399	0.832094	0.923976	0.849416	0.79726	0.97532	0.796488	0.841816	0.925106	0.898137	0.905622	0.731478	0.949761	0.907413	0.994404	0.878945
0.907635	NE		0.946583	0.948857	0.839944	0.917671	0.879708	1	0.918051	0.764504	0.997727	0.966709	0.750752	0.738538	0.721574	0.919199	0.831654	0.980601	0.902234	0.781359	0.920969	0.779085	0.888186	0.963786	0.633187	0.971402	0.808298	0.893913	0.971694	0.84593	0.608638	0.903612	0.686762	0.921734	0.849213	0.954263	0.806742	0.819448	0.948815	0.757777	0.90554	0.912362	0.861401	0.90321	0.698405	0.976736	0.916317	0.995876	0.858474
0.964276	NE		0.960762	0.985467	0.844174	0.940745	0.845448	0.969383	0.912231	0.686158	0.973944	0.970686	0.756127	0.688851	0.72035	0.919663	0.798848	0.925996	0.867406	0.76731	0.920089	0.76843	0.866618	0.961719	0.631008	0.981879	0.77131	0.903396	0.945388	0.821609	0.556501	0.893981	0.658849	0.958775	0.843537	0.95714	0.768271	0.832349	0.942646	0.713269	0.963687	0.917312	0.830239	0.915946	0.676098	0.98296	0.920114	0.997393	0.809093
0.970787	NE		0.965461	1	0.856338	0.956299	0.815109	0.922429	0.898828	0.61364	0.943387	0.968736	0.767212	0.62656	0.72282	0.906107	0.729613	0.87195	0.855354	0.771075	0.924157	0.757596	0.821944	0.97146	0.63102	0.988004	0.691354	0.929688	0.895451	0.815629	0.518197	0.890883	0.629914	0.961032	0.822223	0.926466	0.734393	0.861176	0.945972	0.676268	0.994514	0.928804	0.824987	0.917247	0.6458	0.992561	0.941458	1	0.730305
0.958774	NE		0.975808	0.97039	0.871617	0.96439	0.772705	0.880001	0.89912	0.556852	0.923557	0.979019	0.777754	0.577002	0.727077	0.884951	0.660437	0.830425	0.838352	0.794831	0.921981	0.727437	0.762472	0.984095	0.628417	0.989554	0.613249	0.948464	0.846215	0.821439	0.50452	0.897804	0.616927	0.905251	0.814032	0.893801	0.712182	0.907902	0.956672	0.655431	1	0.928743	0.835898	0.905781	0.607814	0.99503	0.962692	0.999595	0.652297
0.889133	NE		0.982204	0.910995	0.901025	0.967512	0.735535	0.846795	0.915551	0.523954	0.895586	0.968469	0.809454	0.540873	0.743605	0.828239	0.602664	0.772089	0.835187	0.838016	0.891738	0.686594	0.721037	1	0.623612	0.984972	0.551636	0.969372	0.770451	0.826627	0.503636	0.910046	0.602399	0.821951	0.806383	0.865282	0.699638	0.955046	0.952529	0.626569	0.96332	0.922152	0.84663	0.889004	0.559309	0.988268	0.978995	0.992667	0.593108
0.945311	NE		0.967557	0.837095	0.923915	0.95351	0.690941	0.809343	0.930274	0.500665	0.893323	0.943935	0.833897	0.526639	0.746897	0.759251	0.569765	0.704922	0.825974	0.878119	0.861686	0.650917	0.684864	0.989525	0.625505	0.950244	0.513593	0.991699	0.692518	0.808474	0.500145	0.891036	0.591173	0.744279	0.811666	0.836701	0.687611	0.987172	0.930185	0.594722	0.888181	0.895917	0.828042	0.883048	0.528005	1	0.986732	0.980164	0.575982
0.950235	NE		0.95871	0.763315	0.933355	0.90059	0.655112	0.754937	0.953382	0.487913	0.907066	0.911884	0.868592	0.52857	0.763314	0.707649	0.557927	0.621785	0.81316	0.918394	0.822732	0.631418	0.651582	0.956047	0.632287	0.901582	0.499319	1	0.621084	0.807741	0.502443	0.845911	0.577565	0.677282	0.804115	0.815171	0.670504	0.998224	0.879304	0.545974	0.796006	0.864875	0.802566	0.876624	0.506398	0.988829	1	0.967459	0.558658
0.975461	NE		0.947737	0.698298	0.933022	0.809696	0.634246	0.696808	0.95947	0.492323	0.950155	0.858602	0.889985	0.528406	0.771109	0.649382	0.565995	0.567906	0.78329	0.953742	0.745769	0.614484	0.628177	0.888856	0.625436	0.851329	0.495451	0.992748	0.56859	0.81895	0.507028	0.77895	0.566645	0.627855	0.816412	0.792919	0.674303	0.947506	0.817959	0.511566	0.710976	0.809428	0.758333	0.887824	0.495276	0.978094	0.997801	0.968907	0.54684
0.927664	NE		0.953902	0.65421	0.908546	0.711116	0.616495	0.633833	0.941608	0.519922	0.971096	0.770472	0.886725	0.548571	0.78227	0.609613	0.567646	0.549428	0.763905	0.963879	0.684519	0.601189	0.625013	0.817168	0.627458	0.782479	0.502973	0.984039	0.532405	0.872398	0.512038	0.689198	0.571926	0.600726	0.826489	0.754588	0.714833	0.835674	0.742468	0.494359	0.634314	0.752806	0.72688	0.903298	0.495193	0.952454	0.990663	0.961605	0.535707
0.965544	NE		0.98819	0.61845	0.864967	0.643909	0.603304	0.565612	0.896861	0.543885	0.960654	0.684089	0.855947	0.555803	0.798846	0.580887	0.56098	0.550979	0.727098	0.967152	0.650077	0.592832	0.616586	0.764218	0.626247	0.709933	0.50354	0.980338	0.515944	0.935211	0.519579	0.600385	0.575311	0.571293	0.84309	0.716476	0.784236	0.715472	0.671075	0.488935	0.583198	0.690176	0.69943	0.906978	0.494766	0.922385	0.978682	0.960444	0.532993
0.936329	NE		0.988799	0.597064	0.809158	0.613462	0.586391	0.51303	0.832519	0.575469	0.939362	0.622833	0.812636	0.568739	0.824866	0.563116	0.543995	0.556524	0.712629	0.962455	0.641151	0.584422	0.599517	0.723976	0.630577	0.645201	0.51594	0.985498	0.526042	0.981561	0.524297	0.540488	0.577497	0.541387	0.84632	0.664777	0.858612	0.607362	0.605877	0.492791	0.55221	0.629955	0.676577	0.906236	0.489736	0.900584	0.966896	0.939322	0.531893
0.877443	NE		0.957523	0.582414	0.731847	0.600007	0.568578	0.479709	0.769354	0.603275	0.897912	0.588133	0.772473	0.575524	0.835113	0.552004	0.528498	0.553396	0.687004	0.958202	0.63206	0.559177	0.578213	0.694753	0.644273	0.602656	0.52183	0.999243	0.556167	0.998571	0.536874	0.507921	0.580093	0.53116	0.862375	0.630454	0.921216	0.531124	0.568258	0.501805	0.537775	0.592623	0.673865	0.896465	0.491193	0.903446	0.968717	0.921144	0.532008
0.933088	NE		0.90095	0.571421	0.656464	0.589978	0.555154	0.467855	0.707799	0.604977	0.847502	0.570545	0.744665	0.580535	0.829727	0.539988	0.529656	0.555122	0.667494	0.950588	0.61913	0.539337	0.559347	0.667117	0.68048	0.582738	0.536343	0.977065	0.583362	0.982567	0.550841	0.492112	0.583269	0.539585	0.87198	0.618277	0.96623	0.48994	0.536326	0.502024	0.534566	0.58529	0.671323	0.852201	0.500597	0.911742	0.986123	0.909623	0.521292
0.940072	NE		0.835633	0.566564	0.609396	0.584994	0.544616	0.469179	0.6677	0.596535	0.790358	0.561771	0.725699	0.576231	0.810375	0.52969	0.532568	0.536847	0.646646	0.948796	0.603795	0.515954	0.543819	0.638232	0.748814	0.574165	0.542762	0.938904	0.599189	0.930425	0.571933	0.491363	0.587568	0.555593	0.873879	0.604475	0.966327	0.479234	0.523277	0.493093	0.525394	0.593149	0.671364	0.776213	0.504364	0.934447	0.984341	0.922776	0.509454
0.975606	NE		0.778663	0.560114	0.581115	0.586657	0.534262	0.484729	0.651942	0.589555	0.706189	0.557547	0.703083	0.579728	0.785743	0.517131	0.542286	0.517752	0.625365	0.916175	0.591115	0.490451	0.543859	0.642063	0.843002	0.589042	0.55964	0.901277	0.606326	0.847331	0.613816	0.516381	0.595503	0.573613	0.87795	0.62214	0.901626	0.46249	0.513515	0.501634	0.516601	0.603203	0.660418	0.68805	0.505273	0.950485	0.96659	0.923392	0.501429
0.944806	NE		0.769411	0.552318	0.56303	0.581294	0.521416	0.501007	0.649931	0.585259	0.618262	0.562855	0.680088	0.601757	0.767871	0.49934	0.546875	0.513439	0.618688	0.862851	0.573826	0.468983	0.547076	0.656964	0.917484	0.593348	0.565716	0.863241	0.62187	0.755937	0.668249	0.549879	0.61481	0.592254	0.881776	0.646106	0.798766	0.46165	0.509927	0.502098	0.506109	0.604692	0.661024	0.626272	0.518053	0.967653	0.941802	0.926924	0.49295
0.900408	NE		0.786783	0.555392	0.557509	0.568044	0.521002	0.515155	0.646924	0.600183	0.556117	0.563688	0.660764	0.648859	0.760029	0.489965	0.545332	0.501667	0.613765	0.779138	0.544354	0.46276	0.564639	0.662693	0.952038	0.60254	0.573961	0.812668	0.635864	0.694142	0.746132	0.577257	0.648846	0.599496	0.84997	0.678382	0.703068	0.465191	0.49692	0.497613	0.496677	0.61083	0.659029	0.582681	0.534864	0.967516	0.906492	0.918639	0.482445
0.901621	NE		0.790078	0.559586	0.552219	0.563402	0.527185	0.530764	0.64333	0.62528	0.520513	0.558208	0.635199	0.713792	0.742149	0.48766	0.552964	0.494738	0.595156	0.687629	0.513815	0.456678	0.600607	0.671847	0.973986	0.619555	0.579947	0.752301	0.640242	0.666349	0.826937	0.600042	0.713725	0.620214	0.781355	0.713711	0.629239	0.461684	0.483932	0.504865	0.498044	0.619664	0.662997	0.553396	0.574376	0.936703	0.848827	0.93083	0.477611
0.901197	NE		0.793263	0.561617	0.545734	0.551414	0.548085	0.545398	0.644956	0.654839	0.4982	0.554321	0.609846	0.798563	0.725078	0.500601	0.58504	0.487874	0.591623	0.596277	0.480377	0.459235	0.646898	0.683167	0.987868	0.637112	0.58713	0.696794	0.654566	0.654536	0.894713	0.617884	0.768875	0.641681	0.699931	0.736793	0.570016	0.450768	0.467231	0.502265	0.501827	0.631202	0.664688	0.532402	0.629723	0.881262	0.793257	0.937818	0.49472
0.974515	NE		0.777374	0.566434	0.537813	0.542562	0.592688	0.552027	0.643466	0.69063	0.495957	0.548158	0.588264	0.885943	0.709145	0.529885	0.639897	0.497184	0.590134	0.52812	0.469696	0.467125	0.716667	0.698157	1	0.641519	0.599145	0.656582	0.676649	0.639053	0.927997	0.633869	0.785009	0.658069	0.61453	0.737816	0.522423	0.45063	0.447735	0.508135	0.512639	0.663878	0.665207	0.524573	0.694505	0.798389	0.734627	0.95019	0.535228
0.939571	NE		0.769974	0.574617	0.532127	0.537422	0.652825	0.568767	0.635185	0.748618	0.486566	0.542976	0.560215	0.952942	0.678023	0.575816	0.720212	0.506571	0.621367	0.483284	0.470894	0.482901	0.765913	0.701751	0.982944	0.650108	0.641451	0.636466	0.712142	0.629067	0.959546	0.64521	0.794311	0.669654	0.548785	0.739745	0.501583	0.449424	0.431077	0.523384	0.550789	0.693206	0.675399	0.516002	0.755905	0.728474	0.671648	0.939941	0.594765
0.933996	NE		0.762985	0.589318	0.528142	0.54401	0.736604	0.585489	0.641434	0.794834	0.482659	0.5505	0.528279	0.98718	0.644681	0.644283	0.804578	0.532017	0.652309	0.461946	0.469823	0.51391	0.798276	0.706899	0.958017	0.655017	0.695444	0.60634	0.743113	0.611691	0.976627	0.66406	0.82193	0.686161	0.514632	0.709754	0.502565	0.443493	0.433677	0.552952	0.615028	0.719725	0.705516	0.532235	0.810374	0.671433	0.62378	0.881492	0.667161
0.868715	NE		0.761326	0.607942	0.525497	0.54954	0.824727	0.626269	0.638091	0.833353	0.491209	0.570072	0.495994	1	0.620764	0.725925	0.879477	0.566239	0.673976	0.456338	0.477973	0.548218	0.830405	0.71871	0.948259	0.660355	0.738727	0.592521	0.769892	0.596816	0.984106	0.686828	0.853479	0.72095	0.502185	0.706477	0.510195	0.449714	0.457907	0.598483	0.696011	0.741701	0.757531	0.560571	0.847823	0.635598	0.588875	0.791361	0.749939
0.92745	OE		0.759381	0.654325	0.515318	0.579738	0.915948	0.662995	0.634993	0.855962	0.501129	0.598637	0.493868	0.995949	0.601559	0.799611	0.927054	0.63041	0.710225	0.465026	0.501477	0.594661	0.8528	0.736703	0.946742	0.658817	0.761747	0.580194	0.803801	0.577579	0.997383	0.728274	0.884938	0.777081	0.497378	0.717306	0.521679	0.452949	0.499208	0.670107	0.777375	0.758324	0.808648	0.594743	0.917364	0.616161	0.563616	0.730259	0.84979
0.849154	OE		0.750878	0.714558	0.50083	0.628272	0.978868	0.70087	0.656195	0.890528	0.502301	0.636858	0.498014	0.987343	0.597905	0.853231	0.943591	0.701955	0.762311	0.477621	0.543898	0.660528	0.880454	0.771361	0.948976	0.651424	0.797647	0.580741	0.846188	0.55741	1	0.796282	0.905998	0.836887	0.490211	0.755789	0.540604	0.466258	0.563644	0.755913	0.848792	0.784522	0.848171	0.605293	0.970272	0.603955	0.539846	0.687743	0.925671
0.84339	OE		0.737411	0.782385	0.502583	0.678206	1	0.742299	0.678809	0.91226	0.508704	0.689723	0.513411	0.986928	0.600367	0.883119	0.935735	0.780271	0.81424	0.487445	0.571135	0.733136	0.890151	0.795738	0.972241	0.650367	0.827574	0.573258	0.881729	0.535426	0.995449	0.863708	0.941506	0.879995	0.478901	0.809712	0.555597	0.476295	0.642982	0.841209	0.881292	0.821539	0.862343	0.619181	0.990354	0.590344	0.538191	0.674758	0.978155
0.887347	OE		0.714102	0.830017	0.503714	0.720292	0.992933	0.79615	0.718351	0.910951	0.516104	0.758086	0.528557	0.971431	0.612828	0.917712	0.920435	0.842309	0.860533	0.498234	0.631776	0.814446	0.890831	0.831968	0.984729	0.680901	0.855347	0.557424	0.895361	0.516689	0.98352	0.906951	0.961695	0.917641	0.47933	0.869677	0.576486	0.505528	0.733928	0.91352	0.878572	0.861413	0.874268	0.636094	1	0.579402	0.537574	0.657413	1
0.897267	OE		0.684995	0.869664	0.539543	0.774309	0.976773	0.85078	0.770496	0.897437	0.51887	0.840289	0.540893	0.956459	0.632998	0.929507	0.914953	0.865474	0.890186	0.52249	0.699017	0.877637	0.904199	0.862254	0.99097	0.747199	0.886128	0.536084	0.920745	0.496661	0.952247	0.909439	0.989309	0.951605	0.471723	0.909687	0.583032	0.539547	0.8174	0.964106	0.864369	0.88607	0.891415	0.650679	0.982634	0.565883	0.532691	0.644624	0.994392
0.950658	OE		0.676465	0.895713	0.600423	0.830488	0.981321	0.871914	0.814915	0.895881	0.51625	0.918996	0.556328	0.935374	0.651008	0.937681	0.9326	0.871879	0.917639	0.537433	0.786618	0.91263	0.922956	0.869999	0.980124	0.815854	0.931107	0.521782	0.930762	0.485091	0.924168	0.906979	0.994753	0.98264	0.470146	0.938615	0.591531	0.597731	0.883336	1	0.855911	0.909752	0.926176	0.670787	0.952242	0.544156	0.530812	0.639419	0.979063
0.903014	OE		0.698384	0.912567	0.69468	0.889542	0.995686	0.873606	0.856132	0.90353	0.528395	0.967511	0.58001	0.898391	0.663894	0.937684	0.958922	0.854514	0.958816	0.541449	0.859454	0.909318	0.942888	0.880994	0.974259	0.861644	0.965169	0.508362	0.951642	0.491432	0.913517	0.920512	1	1	0.462882	0.952383	0.594129	0.665176	0.938916	0.99908	0.854214	0.911849	0.966004	0.690967	0.938288	0.519522	0.526898	0.632482	0.958656
0.981145	OE		0.738724	0.916084	0.8046	0.943158	0.988136	0.862803	0.906653	0.911049	0.54524	0.98862	0.642559	0.85821	0.671374	0.939476	0.982379	0.805796	0.986848	0.543311	0.891931	0.896678	0.959432	0.886479	0.951481	0.886127	0.992035	0.492453	0.97954	0.501926	0.899904	0.943329	0.990538	0.985538	0.456853	0.95302	0.603366	0.710706	0.97221	0.972587	0.879612	0.9117	0.993165	0.725477	0.935087	0.499033	0.518455	0.623717	0.932317
0.957446	OE		0.786089	0.919349	0.908921	0.9799	0.975821	0.865309	0.955477	0.936836	0.575319	1	0.720647	0.827183	0.701243	0.958423	1	0.770738	1	0.548568	0.904662	0.880538	0.981638	0.883151	0.918411	0.917619	1	0.469578	0.993814	0.528025	0.885362	0.951812	0.976334	0.962705	0.458336	0.975144	0.609433	0.769927	0.984716	0.950586	0.905373	0.905056	1	0.780995	0.93587	0.480493	0.516407	0.608302	0.93185
0.95954	OE		0.838743	0.924692	0.968607	1	0.939486	0.877526	0.99851	0.945337	0.626181	0.999507	0.829652	0.814965	0.75104	0.970423	0.993818	0.751748	0.980364	0.551016	0.890673	0.875067	1	0.908861	0.856148	0.934437	0.975307	0.460118	0.979509	0.589901	0.857788	0.938339	0.953202	0.945838	0.46584	0.984535	0.615152	0.809915	0.971679	0.925076	0.926421	0.892687	0.995822	0.851877	0.920746	0.450973	0.511171	0.595178	0.938508
0.777436	OE		0.867631	0.933283	0.977033	0.999904	0.913505	0.89049	1	0.956253	0.7097	0.995869	0.900816	0.804975	0.826818	0.990374	0.975771	0.751421	0.982087	0.547122	0.864046	0.872001	0.997458	0.928335	0.802183	0.972229	0.961671	0.459085	0.953385	0.676167	0.830888	0.923242	0.911859	0.928268	0.482348	0.990158	0.645468	0.871454	0.937802	0.907885	0.942516	0.891263	0.981607	0.930769	0.913953	0.425708	0.516018	0.576319	0.93206
0.854448	OE		0.871507	0.938864	0.969167	0.978261	0.888515	0.892178	0.993693	0.940845	0.805466	0.991995	0.932652	0.794453	0.891304	1	0.936707	0.745907	0.985387	0.550299	0.853781	0.873159	0.993116	0.918803	0.722662	0.99428	0.967524	0.481076	0.92125	0.794676	0.786856	0.907993	0.868023	0.921635	0.499296	0.999202	0.693611	0.936912	0.919938	0.892329	0.931987	0.909756	0.967923	0.981204	0.923638	0.416875	0.52373	0.548611	0.910022
0.736465	OE		0.876811	0.953664	0.964461	0.951559	0.892383	0.894721	0.979487	0.923464	0.878579	0.982035	0.957681	0.783935	0.928574	0.998223	0.900143	0.728688	0.985709	0.547929	0.873988	0.884868	0.974888	0.91251	0.643303	1	0.973216	0.519595	0.903495	0.907429	0.71864	0.89735	0.817066	0.887203	0.530364	1	0.750729	0.984575	0.908697	0.875326	0.916934	0.924728	0.962902	0.99527	0.943416	0.434678	0.53389	0.526961	0.90151
0.916969	OE		0.889608	0.953209	0.969668	0.933783	0.911182	0.889997	0.972976	0.926938	0.909124	0.981091	0.972506	0.768829	0.92795	0.98596	0.869831	0.692763	0.968844	0.564737	0.890258	0.899687	0.963393	0.915308	0.527738	0.994456	0.96668	0.595349	0.883626	0.972416	0.616065	0.884862	0.741434	0.841128	0.58346	0.984348	0.807056	1	0.918597	0.877866	0.882384	0.908424	0.961802	1	0.96526	0.459911	0.551107	0.505286	0.918625
0.911674	OE		0.894361	0.947189	0.976612	0.925744	0.935382	0.88184	0.958003	0.912206	0.928873	0.981405	0.997697	0.739816	0.9237	0.972338	0.829821	0.627153	0.94461	0.598194	0.900381	0.926209	0.94187	0.926319	0.370504	0.991464	0.935443	0.678886	0.884663	1	0.474002	0.865437	0.639425	0.781235	0.650198	0.952874	0.852189	0.996042	0.9272	0.873791	0.845136	0.884283	0.973027	0.994343	0.975118	0.493257	0.560024	0.482405	0.944854
0.894106	OE		0.918007	0.915361	0.993685	0.915588	0.959553	0.866903	0.947928	0.880806	0.941692	0.977045	0.991978	0.675295	0.925893	0.956911	0.768777	0.540455	0.901697	0.63949	0.888418	0.953035	0.897655	0.926026	0.196546	0.961807	0.887587	0.763845	0.864249	0.999102	0.321919	0.830904	0.519721	0.707784	0.730412	0.894619	0.883896	0.981285	0.940317	0.881609	0.827845	0.850999	0.98064	0.979212	0.955066	0.539726	0.588308	0.489888	0.968563
0.926966	OE		0.942348	0.876327	1	0.916041	0.973952	0.843521	0.9459	0.826557	0.920452	0.967261	0.989403	0.583246	0.942619	0.917056	0.68373	0.416656	0.851966	0.701706	0.86384	0.9811	0.840472	0.91995	0.0618854	0.940871	0.829152	0.815752	0.821246	0.98385	0.175271	0.782321	0.377294	0.610399	0.809633	0.842766	0.907024	0.957972	0.948299	0.875853	0.807131	0.840597	0.993701	0.961851	0.924475	0.586931	0.640765	0.50528	0.946885
0.845967	OE		0.956457	0.841254	0.972318	0.922286	0.991712	0.796266	0.931399	0.763457	0.898524	0.971147	0.995303	0.461507	0.929095	0.883135	0.588092	0.271394	0.807661	0.763208	0.824727	0.997275	0.788957	0.902108		0.925884	0.778939	0.85018	0.744016	0.976009	0.0718375	0.730584	0.220393	0.519959	0.884103	0.756641	0.926656	0.948591	0.937652	0.848845	0.792733	0.832321	0.987502	0.954278	0.888908	0.6208	0.709184	0.516842	0.882199
0.95676	OE		0.970627	0.801648	0.924822	0.927597	0.990906	0.731205	0.931003	0.69159	0.909384	0.989544	0.989982	0.303342	0.912864	0.873184	0.486232	0.132779	0.775823	0.795297	0.764954	1	0.713503	0.854744		0.919168	0.74187	0.876917	0.625923	0.976608	0.0109614	0.64995	0.0863685	0.396706	0.932511	0.642671	0.944297	0.953943	0.913584	0.826457	0.775697	0.788069	0.972804	0.950586	0.851812	0.655447	0.796666	0.538983	0.830772
0.789188	OE		0.975026	0.763096	0.876707	0.911197	0.985586	0.62805	0.926963	0.58459	0.922499	0.994792	0.988762	0.136514	0.90252	0.853465	0.374894	0.029834	0.724123	0.816119	0.713408	0.990328	0.60528	0.808159		0.903781	0.695074	0.891686	0.495662	0.966766		0.532478	0.00176848	0.230408	0.978168	0.478479	0.938123	0.967922	0.868347	0.792663	0.745229	0.696502	0.953571	0.9464	0.813939	0.692078	0.878553	0.578691	0.814646
0.87663	OE		0.987147	0.718212	0.867115	0.874927	0.953876	0.483058	0.917981	0.429319	0.933085	0.998103	0.98475	0	0.888986	0.836533	0.256976		0.670101	0.819231	0.671324	0.974144	0.451251	0.754791		0.893371	0.636946	0.903682	0.354824	0.953909		0.386342		0.072532	1	0.297711	0.928959	0.990128	0.82913	0.772741	0.68228	0.543318	0.922086	0.933884	0.768661	0.716144	0.934887	0.636673	0.8139
0.925123	OE		0.997885	0.655898	0.87024	0.84781	0.902738	0.305296	0.906954	0.229097	0.933206	0.987672	0.984573		0.889226	0.802143	0.142238		0.593981	0.826191	0.654445	0.94521	0.263943	0.682306		0.896446	0.528329	0.902502	0.19655	0.942515		0.235751			0.994279	0.128329	0.952316	0.981287	0.787603	0.749676	0.587381	0.354152	0.87955	0.930475	0.713921	0.748894	0.95659	0.708248	0.818301
0.888992	OE		1	0.561911	0.87795	0.83354	0.843911	0.124637	0.889435	0.0308607	0.91685	0.94131	0.995555		0.900854	0.7627	0.0579943		0.488415	0.83887	0.614501	0.926245	0.103881	0.605575		0.873091	0.34871	0.895365	0.0448958	0.939532		0.114821			0.980063	0.0281826	0.979373	0.962803	0.752491	0.72962	0.450853	0.174175	0.829996	0.934652	0.637949	0.782865	0.956558	0.790557	0.791712
0.882548	OE		0.983584	0.431601	0.893954	0.822194	0.768997	0	0.864253		0.901659	0.906348	0.991016		0.93004	0.678834	0.0071524		0.332445	0.861453	0.505634	0.887905	0	0.498957		0.828996	0.157911	0.883024		0.928018		0.0384507			0.955677		1	0.924879	0.701755	0.702476	0.296792	0.0641017	0.774481	0.933957	0.561577	0.820441	0.95633	0.850307	0.715965
0.830854	OE		0.958452	0.282954	0.899087	0.822656	0.680644		0.840067		0.868582	0.857345	1		0.954631	0.5438			0.1789	0.895522	0.334288	0.829311		0.364296		0.775773	0	0.868096		0.918523		0			0.916918		0.991988	0.882991	0.627975	0.637505	0.150247	0.0122135	0.712552	0.932335	0.480385	0.859137	0.957171	0.895976	0.610905
0.940325	OE		0.92767	0.148479	0.895849	0.814992	0.588502		0.813437		0.865718	0.770645	0.993993		0.982009	0.378768			0.0632353	0.919255	0.146861	0.741974		0.22041		0.708414		0.869984		0.914792					0.884651		0.971057	0.869251	0.525869	0.515117	0.053096		0.633317	0.924353	0.363561	0.875995	0.949857	0.902383	0.474532
0.967773	OE		0.90536	0.0562351	0.884872	0.779579	0.469211		0.792792		0.877781	0.650196	0.970814		1	0.207726			0	0.926256	0	0.61133		0.109399		0.607473		0.86575		0.926992					0.847598		0.961254	0.861606	0.395473	0.341847	0.00348725		0.550202	0.908917	0.23431	0.881025	0.924716	0.887603	0.305439
0.840104	OE		0.858723	0.0153797	0.864411	0.709409	0.316402		0.75973		0.880532	0.50726	0.955675		0.991986	0.0797244				0.928442		0.450559		0.0424167		0.466858		0.867698		0.941301					0.823134		0.961276	0.833411	0.220154	0.166558			0.448901	0.88922	0.116918	0.886087	0.889232	0.871912	0.125916
0.747392	OE		0.800919	0	0.829277	0.618964	0.161753		0.730561		0.903946	0.36853	0.941159		0.97576	0				0.916147		0.277343		0.00683146		0.293392		0.87179		0.931937					0.828265		0.947979	0.772462	0.050611	0.0559549			0.334543	0.865082	0.0449624	0.890343	0.858324	0.875289
0.970019	OE		0.742559		0.756096	0.486156	0.0545211		0.698891		0.895932	0.235749	0.916393		0.961389					0.927883		0.110847				0.122575		0.878813		0.916904					0.855054		0.930415	0.696321		0			0.217421	0.833602		0.909246	0.839577	0.890161
0.721436	OE		0.689454		0.655783	0.324769	0		0.679411		0.876922	0.120032	0.872869		0.956456					0.946996		0				0		0.909497		0.918074					0.884936		0.894307	0.650175					0.111279	0.796963		0.9133	0.794869	0.903015
0.855044	OE		0.638553		0.522544	0.172941			0.650044		0.865937	0.0437892	0.814641		0.960748					0.970515								0.936545		0.934639					0.898398		0.845964	0.624448					0.0377127	0.748812		0.9049	0.782995	0.887922
0.822616	OE		0.599503		0.362401	0.0619203			0.592955		0.845562	0	0.727588		0.955394					0.981894								0.940134		0.930529					0.91002		0.795152	0.603692					0	0.71211		0.908106	0.785224	0.866804
0.855583	OE		0.554581		0.205075	0			0.496597		0.832794		0.644707		0.946699					0.986363								0.935936		0.881907					0.92546		0.739356	0.529413						0.667939		0.915908	0.778319	0.847197
0.81087	OE		0.47481		0.0881585				0.359607		0.807219		0.562122		0.948209					1								0.896016		0.823604					0.933972		0.657318	0.403051						0.607707		0.926637	0.770172	0.856147
0.830158	OE		0.356628		0.0274129				0.199644		0.765176		0.486997		0.93719					0.999117								0.871251		0.742098					0.939148		0.567021	0.249276						0.534989		0.929672	0.754716	0.877252
0.974821	OE		0.213705		0				0.0733821		0.734878		0.399994		0.912627					0.999304								0.854221		0.659149					0.927664		0.453248	0.0816635						0.449146		0.90767	0.7565	0.89597
0.763613	OE		0.102483						0		0.695161		0.303302		0.871156					0.988429								0.854615		0.542063					0.921895		0.309573							0.341752		0.887446	0.734948	0.911489
0.733162	OE		0.038663								0.666371		0.191951		0.836363					0.964217								0.855584		0.387507					0.90679		0.16399							0.214081		0.853491	0.696034	0.909644
0.977296	OE		0.0110671								0.617857		0.0788282		0.785776					0.947765								0.843455		0.233788					0.886927		0.0564305							0.104128		0.819171	0.650734	0.88366
0.900498	OE										0.542067		0.00507879		0.739261					0.933929								0.823077		0.111221					0.858353		0							0.0418329		0.782269	0.608115	0.855781
0.907289	OE										0.447389				0.702223					0.90532								0.77801		0.0442535					0.821265									0.012267		0.755076	0.580376	0.825127
0.781907	OE										0.299452				0.653771					0.854105								0.729464		0.0139154					0.795724									0		0.723464	0.564387	0.797101
0.979161	OE										0.13247				0.574135					0.795711								0.684556							0.779283											0.675639	0.542887	0.766395
0.902959	NE										0				0.445802					0.748221								0.644578							0.759821											0.603021	0.50438	0.751143
0.882826	NE														0.265453					0.716369								0.594104							0.735222											0.502906	0.44092	0.719061
0.929275	NE														0.101771					0.685304								0.527045							0.686555											0.380989	0.339514	0.668391
0.928797	NE														0					0.641491								0.441433							0.621819											0.237674	0.21916	0.605732
0.977137	NE																			0.588162								0.340776							0.529669											0.0974323	0.111853	0.539757
0.958515	NE																			0.552896								0.223149							0.434186											0.00762361	0.0354819	0.456295
0.977389	NE																			0.51277								0.102086							0.333206													0.341478
0.986592	NE																			0.462919								0.00994355							0.213603													0.196192
0.984519	NE																			0.35791															0.105376													0.0704118
0.984776	NE																			0.211383															0.0275153													0
0.879184	NE																			0.0819963
0.981481	NE																			0.00929536
0.990131	NE
0.915205	NE
0.890252	NE
0.923331	NE
0.922675	NE
0.869774	NE
0.977786	NE
0.943264	NE
0.965813	NE
0.922961	NE
0.873386	NE
0.942731	NE
0.965789	NE
0.946072	OE
0.985807	OE
0.858136	OE
0.905013	OE
0.905209	OE
0.924483	OE
0.950735	OE
0.822515	OE
0.878827	OE
0.791267	OE
0.890319	OE
0.926782	OE
0.839444	OE
0.9003	OE
0.804401	OE
0.788264	OE
0.891091	OE
0.902653	OE
0.979519	OE
0.839697	OE
0.845243	OE
0.894504	OE
0.908828	OE
0.978088	OE
0.830629	OE
[truncated: 91 more columns]
