# Supplementary material for: Variations of intracellular density during the cell cycle arise from tip-growth regulation in fission yeast
Source: eLife. 2021 Jun 8;10:e64901. doi: 10.7554/eLife.64901 (PMC8221806; doi:10.7554/eLife.64901)
Supplement: Figure 6—source data 1. [file elife-64901-fig6-data1.xlsx]

## Sheet: Fig6_PoleGrowthDensity
Figure 6B			Figure 6C						Figure 6E
Density difference (mg/ml)			cell ID	Old pole growth (µm)	New pole growth (µm)	Old pole average density (mg/ml)	New pole average density (mg/ml)		5 min			35 min
5.18046			3	3.02171	2.20862	294.316	300.153		Daughter density difference	Mother halves density difference		Daughter density difference	Mother halves density difference
0.481382			4	4.0098	1.83798	273.384	296.894		2.05147	13.7065		2.05147	-5.20054
11.4019			5	3.44362	1.31908	283.086	305.615		20.8391	30.2981		20.8391	20.6752
13.5832			6	3.96183	1.94044	291.48	299.742		5.52221	10.5863		5.52221	-6.55543
9.7222			7	3.10677	1.52567	284.676	287.848		11.4041	22.8796		11.4041	19.4247
11.7865			8	4.29333	2.72002	278.377	290.81		15.06	10.543		15.06	3.7048
11.3346			9	4.13198	3.39574	283.304	288.876		3.15033	-12.3409		3.15033	1.44046
3.73047			10	3.90077	2.88276	287.538	294.96		-19.3488	-30.8644		-19.3488	-4.24719
2.4289			11	3.56475	2.17383	287.141	297.331		3.17107	5.68035		3.17107	-13.021
0.134101			12	3.90299	2.40052	273.457	294.451		-3.41322	-23.5949		-3.41322	-14.4362
2.47254			13	5.25656	0.645266	276.887	296.908		24.8076	17.9736		24.8076	1.0055
3.95728			14	3.04861	1.37173	285.954	301.757		8.04291	-8.01466		8.04291	16.4653
12.0576			33	3.73151	3.49135	276.334	287.216		25.3959	7.85681		25.3959	17.5524
0.562652			34	5.60359	1.82926	269.668	293.178		-17.8085	-50.8911		-17.8085	-9.15569
7.72177			35	2.54421	4.89525	283.863	288.509		24.6849	21.1739		24.6849	-10.9609
1.59808			36	3.62732	2.35036	261.104	276.273		21.1585	17.9627		21.1585	8.91692
10.8728			47	3.43754	0.532311	269.829	296.651		42.3655	42.7233		42.3655	19.7847
1.55912			48	5.67758	0.514578	270.489	299.066		-32.0587	-13.8958		-32.0587	-12.7694
16.1053			49	4.1078	1.83963	273.691	290.458		-36.8207	-47.4152		-36.8207	-7.53559
3.67017			50	4.6257	1.4515	266.521	284.773		-27.9958	-50.5355		-27.9958	-14.7897
7.02272			54	6.01419	0.743612	282.839	301.82		21.6093	42.1373		21.6093	9.04797
10.0026			55	2.00013	3.70768	288.017	282.188		1.4917	29.6598		1.4917	8.43054
2.92798			56	4.68971	0.0243222	264.293	280.777		14.4259	19.01		14.4259	15.8746
1.68118			57	4.56128	0.877364	266.033	281.259		-16.0945	-14.0797		-16.0945	-19.3735
31.0682			69	4.67039	2.57744	288.044	290.931		19.5359	41.5321		19.5359	19.1759
12.5842			70	6.23599	0.438686	257.759	283.311		-14.2208	-12.2641		-14.2208	-8.81252
7.12698			71	5.0034	0.44664	261.003	283.273		-10.9624	-41.7838		-10.9624	-12.4294
8.07698			72	0.605125	5.57094	312.875	283.93		4.31892	-9.87185		4.31892	-1.41963
17.2215			73	5.48313	0.886167	264.676	295.659		11.645	13.6408		11.645	6.87633
12.0164			74	4.59434	1.26	264.093	291.816		-3.99442	-17.0288		-3.99442	-12.4478
17.1096			75	2.20299	5.41016	295.796	279.991		9.21094	13.9625		9.21094	-3.48765
4.10369			76	3.64933	1.0222	256.943	275.055		-39.6581	-40.886		-39.6581	-20.5568
21.8984			77	5.04597	1.55084	274.776	297.09		33.1842	49.2167		33.1842	18.6691
8.85936			78	4.52399	2.15901	291.988	291.34		1.96047	10.923		1.96047	-4.74338
25.7338			79	6.36604	-0.108821	256.651	284.065		25.9664	36.6339		25.9664	22.7398
19.5752			80	4.93476	1.26286	277.947	298.489		-17.7693	-33.2351		-17.7693	-14.4443
17.2181			104	4.02825	2.29466	264.8	281.383		-22.0705	-30.2337		-22.0705	-21.5623
7.9661			105	4.95481	2.11123	253.97	274.448		-32.655	-30.7997		-32.655	-21.9261
0.811174			106	4.49238	2.53803	269.919	286.963		-17.2606	-38.5384		-17.2606	-2.78648
8.27051			107	5.55382	1.17323	259.046	277.732		6.05534	17.1097		6.05534	4.48503
7.32563			117	2.20941	3.06362	282.935	290.185		-2.521	10.6765		-2.521	6.78295
4.75865			118	4.26568	1.68547	266.025	283.172		14.2101	16.3547		14.2101	-18.7343
16.4288			119	4.32613	0.887095	277.266	295.724		-14.5586	-23.5412		-14.5586	-17.46
18.6943			120	4.44814	1.81369	267.702	282.584		-15.5798	14.3541		-15.5798	5.32226
6.25297			121	3.87895	2.24701	271.498	282.892		10.0229	21.9782		10.0229	-0.0349862
10.2084			122	4.28957	1.43627	259.213	275.716		12.1139	20.8881		12.1139	13.6058
13.5686			123	4.92705	1.90964	273.705	285.188		-19.5301	-12.7334		-19.5301	-2.60009
15.7153			124	4.71025	2.90706	285.656	287.013		-20.7254	-23.5378		-20.7254	-3.71758
18.7117			125	2.97902	2.26852	289.892	291.799		13.7455	25.4309		13.7455	11.8711
6.77494			126	4.78046	2.0023	273.188	280.618		13.1694	23.832		13.1694	2.48555
0.0347104			127	4.3549	2.46367	277.625	277.077		12.5475	18.7133		5.15207	-13.7478
2.80423			128	3.49601	2.59963	263.297	272.324		5.15207	-17.8037		9.04945	17.6695
14.9377			129	3.10961	3.49198	264.72	270.349		9.04945	37.4136		-1.24395	-20.1589
0.65591			130	4.74306	2.41576	256.575	272.614		-1.24395	-23.8542		19.2411	9.38353
9.99039			149	3.9057	3.07428	274.446	286.004		19.2411	-8.24332		-12.2983	6.4733
12.3296			150	3.43577	1.4999	269.781	276.575		-12.2983	-23.8881		24.1532	7.15496
28.535			151	4.00392	1.25652	278.002	297.317		24.1532	24.5483		-2.39415	-9.67224
5.18313			152	4.42423	0.217447	296.586	319.156		-2.39415	-14.5965		2.23065	0.843713
12.2915			153	3.06219	2.87055	266.426	275.439		2.23065	20.9633		5.34461	-16.9883
7.53273			154	4.58762	1.15005	265.19	275.737		5.34461	2.38698		-10.3381	-5.62167
1.24997			155	3.6874	2.17362	264.761	275.413		-10.3381	-15.7535		10.1195	7.35818
1.90513			168	2.72964	2.12209	291.684	287.026		10.1195	24.2008		-10.8055	2.25584
1.05794			169	4.63817	1.57825	267.229	282.225		-10.8055	14.5695		-11.0738	1.53032
24.6793			170	4.96158	1.2776	280.593	293.812		-11.0738	2.69855		-8.16834	-20.4544
12.977			171	5.01743	2.65938	276.507	283.964		-8.16834	-28.8673		-6.84195	-20.7201
4.10626			172	3.85733	2.14064	293.471	294.952		-6.84195	-52.5732		-3.1777	-3.11897
1.33609			173	3.21535	1.62102	276.83	290.748		-3.1777	24.865		-14.6752	-5.97107
2.37118			184	6.44338	0.952838	271.767	287.565		-14.6752	10.2412		9.64293	-8.18811
2.54199			185	4.36746	0.9385	280.345	297.644		9.64293	-7.8576		-14.1252	-9.03998
7.39062			186	3.06989	0.807414	279.212	301.064		-14.1252	-31.0481		8.59249	18.0925
1.53538			187	4.38387	1.99694	269.215	281.601		8.59249	4.83512		-6.9598	-18.2402
0.924151			198	6.19914	0.840883	264.423	280.001		-6.9598	-1.1229		5.36069	9.60603
12.7611			199	6.19405	0.84601	264.476	284.8		5.36069	16.8401		-2.66567	-11.6985
2.88092			200	4.90866	0.258342	264.215	291.381		-2.66567	-14.2637		11.9188	0.568446
15.1341			201	4.65835	0.235602	270.819	287.639		6.88403	14.9746		16.4562	13.4867
3.14225			202	3.75118	2.78889	286.54	286.297		11.9188	48.4144		23.6821	1.98995
0.453543			204	1.91083	4.90656	300.139	294.468		16.4562	26.7411		18.45	-5.90595
14.5319			205	5.30063	1.15022	280.148	286.839		23.6821	28.85		2.35108	-1.17026
20.1922									18.45	11.7279		18.1861	12.2885
6.29697									2.35108	13.3792		-26.6779	8.01171
3.82518									18.1861	14.7124		-1.77178	-10.3976
7.46253									-26.6779	-8.32046		-30.0046	-7.26842
1.6324									-1.77178	-5.90224		16.0034	11.7934
1.03418									-30.0046	-25.8861		26.3057	20.7983
6.59653									16.0034	20.8136		24.1801	2.8552
1.37965									26.3057	29.149		-10.409	-21.8116
4.4328									24.1801	1.09472		2.61856	3.74176
2.73601									-10.409	-16.4058		-1.18561	20.7227
2.49489									2.61856	10.25		1.58158	13.6621
6.91809									-1.18561	9.15814
1.91116									1.58158	17.3099
6.51852
18.4883
10.3924
16.0749
5.93662
7.32219
29.5767
2.44979
11.2185
8.26151
20.6963
8.01687
11.9863
23.2935
21.4094
17.5062
17.9064
12.9888
2.0502
15.7174
8.33789
13.3347
8.34874
4.28383
1.89765
11.517
5.06122
1.3201
1.4655
2.3838
8.88141
14.1221
1.6661
13.0402
1.4309
4.63247
5.95237
4.78682
1.58484
15.7298
6.8791
0.0974471
8.72796
3.93593
13.5624
1.29325
2.28908
7.08024
4.96518
7.20304
0.476599
6.09006
15.2151
7.87496
6.9314
6.04357
14.5578
2.97077
15.138
3.14117
0.865908
4.2829
16.478
22.1725
5.03858
4.95996
11.36
3.29074
3.00605
11.6737
8.59653
5.5827
5.96822
1.27394
12.6196
19.6931
18.9148
28.9985
6.73698
3.6224
8.01444
4.75745
16.8303
12.6696
10.1708
26.1103
20.8762
16.3289
24.8336
20.8584
0.328017
22.7073
23.8998
13.3806
1.60321
2.64037
26.7931
13.6133
19.9778
28.936
18.748
8.6537
17.9054
3.27884
7.15289
1.37615
3.15279
12.1966
4.72497
1.96647
5.27557
0.681808
8.5959
8.32705
6.27304
0.636978
10.5035
3.88535
5.47954
1.04445
2.1903
9.26068
0.955763
3.65404
13.3192
19.1701
18.8164
1.01041
28.0803
0.510581
16.1109
4.8281
15.5173
1.47144
24.664
25.583
4.45645
5.04234
13.3108
11.4592
15.4973
7.7041
3.79565
2.84806
15.3511
2.50427
27.9949
18.2605
18.0506
0.395084
1.98182
0.562578
13.3785
7.85047
25.7448
2.09786
3.71248
25.7441
38.2269
3.80725
19.1323
25.9473
4.51516
33.055
17.8257
8.14703
20.9163
13.4795
20.8652
2.11129
18.9683
14.3001
23.1695
4.25255
4.67673
7.70032
8.77314
5.15556
7.03473
15.5311
4.80625
5.61509
3.0967
15.523
9.08351
2.37787
3.55419
8.68245
2.506
3.7295
11.8009
0.141356
5.06577
1.74357
5.69544
2.11175
2.60755
9.69016
18.6499
16.9755
0.520609
0.202764
32.0573
2.7993
6.13312
15.9796
5.70635
0.390427
25.8642
29.3394
15.695
19.4227
10.2525
9.65424
14.5885
8.99879
28.5013
4.03235
11.6813
12.2857
7.58212
23.3041
26.5861
18.5886
18.9309
9.6948
10.4326
10.136
17.4797
2.49963
14.9459
8.90163
4.04741
24.4054
42.1138
3.65879
14.5654
22.4894
26.148
13.54
23.3985
21.0504
16.547
13.1835
19.8357
0.154272
2.80506
3.00891
7.1693
4.56345
16.3227
8.55037
9.07843
7.60933
1.14642
4.93503
2.74936
27.0888
8.24419
2.46318
4.51016
10.2343
6.95291
4.66809
12.7388
6.31898
15.2641
4.69858
17.296
23.9973
15.7668
15.8658
18.7273
6.53068
0.803583
5.3838
6.71311
3.04809
30.6463
21.8897
12.1371
5.49447
16.4944
21.3773
18.8861
9.2019
22.6563
12.3879
17.2328
11.7081
15.8681
6.89517
15.7688
23.2527
22.004
1.97016
2.51342
2.99983
0.298024
10.432
2.85922
10.8698
15.038
36.0762
42.8417
29.5516
4.07336
35.1109
4.94715
21.7968
21.7885
20.5711
8.48979
2.2709
21.7778
16.1221
34.9803
3.31922
10.284
8.57484
2.6089
0.16247
5.77666
1.32335
15.7229
9.61383
13.973
2.65897
9.20742
20.7163
16.6577
2.70939
9.71728
0.872356
2.73727
9.73048
7.73314
5.44246
2.42109
26.6143
2.35491
8.41041
12.7784
26.3304
0.91085
15.9556
41.8464
10.2024
9.94953
13.6849
1.25344
1.61182
26.6683
10.252
1.42188
2.72235
22.1013
17.9452
8.23226
12.4499
11.1364
4.55615
24.8628
12.5527
17.0639
0.97169
19.6978
28.0123
21.565
18.1771
10.0501
13.2265
13.8912
13.5382
27.3968
1.33772
17.5382
9.51762
40.2741
6.97114
26.4621
33.439
12.8955
34.2484
13.6696
11.5961
17.785
6.53708
11.0135
1.53234
12.446
15.3213
26.8756
11.1575
16.8069
3.14686
2.15161
0.0449353
7.98824
8.14732
19.2821
7.3916
19.45
14.0887
11.9845
15.1816
17.4111
1.16662
4.51788
9.07395
7.99355
14.0919
1.44682
3.73602
3.68535
28.1866
5.53583
16.7627
20.2329
18.8069
5.38372
16.8427
37.3301
17.8593
0.617617
12.9857
0.231654
3.30862
22.5974
19.3655
11.6059
3.09679
23.9679
17.6253
15.649
13.517
15.4485
24.4163
16.0826
19.679
28.8506
17.2056
29.871
6.13348
24.0496
19.8423
2.79535
6.28294
8.31964
0.656689
20.1801
25.0014
40.4222
33.0876
56.389
21.6313
20.0727
27.9262
13.3945
36.8804
6.27235
34.662
28.3689
31.9412
16.417
2.72282
8.57244
18.0202
23.8531
10.392
14.694
12.6661
3.45998
5.45657
5.21061
6.47196
25.5907
0.349314
9.5669
22.578
13.7281
14.4157
18.9592
1.54755
14.5136
10.1441
13.6353
11.0827
8.67614
2.2169
34.4963
3.68221
6.3493
15.8774
10.8984
0.610444
13.3482
37.806
23.3356
14.6954
28.216
1.89007
10.1676
46.9258
16.8186
20.858
0.862424
11.7619
21.0727
15.8178
10.1246
23.579
28.3052
11.205
2.15416
37.1342
3.94565
23.3657
24.8687
15.1899
17.2514
21.0512
18.7955
17.0482
10.4194
13.1812
21.5428
14.2175
32.4756
61.2932
34.5598
50.4208
25.4352
33.37
20.803
14.361
12.6129
21.4303
19.6475
19.4167
22.26
20.986
2.81946
17.17
24.3153
19.1281
15.1535
5.78313
19.6042
3.03243
5.67435
4.28658
20.8487
17.8448
5.97567
12.4848
9.56987
19.0497
17.1084
25.32
16.7882
14.2661
5.4353
18.6203
13.2378
2.73616
20.0087
11.6795
9.05182
18.7931
10.0052
16.8564
15.6298
1.28432
19.9031
5.65572
0.824208
20.5135
11.1974
5.78724
11.3207
14.9293
11.7475
14.0758
19.6924
20.1628
6.87325
19.1564
20.2058
28.3553
2.27045
45.9431
29.0417
26.1675
20.0662
21.8317
27.2096
12.279
4.65074
15.4476
10.702
26.9545
30.2111
61.1379
30.8646
34.8056
14.077
18.2953
13.6611
10.5343
31.267
38.0885
18.6417
24.6965
0.566586
17.8989
24.9162
20.9875
7.03462
20.371
8.31928
0.0610543
19.7875
5.98221
18.915
12.3892
7.3788
11.0583
8.204
7.71955
12.9025
12.6851
8.11143
12.9149
16.2328
7.42435
7.99985
19.7585
5.81736
5.53521
13.7377
13.3456
17.1185
16.0471
11.4265
15.3558
0.0493058
2.1121
7.47525
29.8408
20.9826
18.4244
1.00447
12.6622
12.7345
29.3328
21.3365
21.5974
22.1752
28.709
4.90745
20.2719
30.537
22.0991
30.3311
16.0741
32.5214
10.0903
19.8539
1.86466
7.92862
32.5105
39.6975
56.7253
25.3328
47.9484
24.8567
28.5918
27.9083
0.537835
23.2865
27.2208
13.499
18.7335
6.1947
4.48655
11.9032
25.0606
1.14111
7.64804
0.661434
11.4687
14.2154
9.55313
15.9295
12.8485
12.7634
28.8264
24.4453
19.8939
9.95537
14.791
24.217
0.231613
14.228
14.139
22.214
11.53
17.2342
27.4978
13.9032
24.692
25.6774
44.7472
8.84499
4.13888
6.64367
11.1024
7.18866
39.9024
26.3705
6.80771
4.33245
32.0701
10.4774
12.4651
27.4197
29.2471
30.562
18.5266
3.5402
17.8998
29.6987
30.7111
21.5793
33.43
44.9932
20.472
15.2958
28.4878
24.9081
39.4455
64.3155
28.1307
36.8413
27.4765
27.0929
27.4202
3.04822
23.3694
8.53416
21.2799
20.0436
6.12736
30.0478
2.7912
6.85614
20.7032
29.782
7.56171
20.4489
18.6566
5.02325
0.137273
12.7933
10.2318
10.4208
6.32458
6.64287
24.8042
5.93574
27.2959
14.4561
11.7246
11.6624
17.4284
7.12433
0.922212
15.346
9.76612
26.4419
6.94147
12.3598
16.4021
13.1875
0.112671
30.0039
24.2715
51.2932
17.101
12.3533
1.88551
2.54711
33.5315
1.14637
26.5444
16.9729
10.9577
13.4635
20.1505
36.1167
26.9241
1.99273
17.6524
19.6819
0.48383
6.34454
6.99088
23.0312
15.4024
14.1066
20.4425
33.9147
34.0676
52.4539
38.6045
51.4239
22.0542
43.78
16.1631
1.89481
17.6043
17.0395
23.8902
23.8113
21.5665
28.184
8.75912
25.0032
9.20903
19.6593
5.37182
27.5333
24.3436
21.2617
8.45639
5.09734
3.8784
13.6992
16.7454
16.0515
5.73245
14.0321
5.71235
3.49323
20.3437
3.29375
6.33213
10.5606
15.9749
7.92514
15.1938
22.1576
5.06263
13.9114
14.6445
11.8869
39.0468
30.9244
19.0623
37.0804
6.52717
5.36331
12.1844
37.4658
18.602
1.24352
16.0002
20.5121
5.1893
12.182
34.2593
32.5393
5.85348
14.9181
4.78624
23.3198
7.52717
19.0363
34.8132
17.9016
36.7753
31.3112
15.6041
5.32919
1.32175
20.0531
30.4012
49.1758
64.2628
40.9596
41.2903
26.4408
31.2018
7.98126
11.7761
15.0023
40.91
16.5109
16.0759
14.8515
31.2363
17.705
26.1177
16.6184
2.1264
2.24527
17.5789
19.5281
19.0141
20.4744
1.72723
5.46776
5.71595
0.769639
25.5644
26.3572
26.405
17.4323
24.5098
29.755
17.8806
12.2754
1.08231
18.9815
1.18541
8.72715
13.2149
17.6322
35.4667
0.873908
27.1101
28.6065
33.8866
7.21256
7.8244
15.2795
15.7656
10.2417
27.2888
22.3319
0.421092
16.1581
19.1724
3.71134
9.14393
31.0826
37.2742
13.9934
12.4029
26.1386
23.706
1.9437
20.1701
28.1692
35.427
20.8864
21.6927
25.4111
16.1044
16.7298
23.5676
0.795739
33.3499
41.108
54.8314
38.6489
20.1601
19.0913
14.7475
18.5569
13.8929
14.3203
51.0431
3.21861
23.0955
27.5774
26.8944
11.0293
15.5366
22.8742
11.1327
7.6796
16.0963
16.0853
19.0019
6.47581
10.0701
3.42617
11.0288
8.76816
43.3072
35.5296
29.5034
9.00204
11.9777
2.17062
7.05384
8.7103
2.90402
27.0862
16.5285
15.582
8.81113
26.5083
15.193
21.3941
30.117
7.42691
32.0099
28.1975
22.2471
15.9411
4.79726
9.40083
22.2148
25.357
23.9722
25.5263
1.5096
2.91144
28.6278
4.21686
3.25521
14.5591
36.3331
31.9712
9.038
31.7206
26.5608
10.1054
11.651
23.4799
19.4458
23.9869
34.1412
22.2655
3.49254
15.9238
29.6681
6.47794
44.1608
44.1094
55.04
43.9178
3.6756
8.64732
22.9587
29.8634
13.6754
29.7459
53.4566
1.44907
24.6925
25.0564
21.6927
15.5455
14.9453
24.427
16.3583
3.85482
20.7381
4.49096
6.39871
2.60347
15.5639
0.946508
12.2354
10.5984
35.6132
30.1167
31.9651
18.5072
18.8927
19.1654
11.003
32.9989
13.7253
1.75842
5.63019
19.3631
21.9186
4.03625
29.8926
7.64827
19.4559
56.1619
31.0771
21.1047
16.7613
16.6096
9.79831
21.0084
22.1189
10.4017
17.5612
4.86709
19.7337
10.554
12.5897
14.5951
30.3501
28.3618
0.409758
20.041
21.0677
14.7253
14.226
21.8665
31.7649
31.0074
36.6982
33.3184
8.00644
10.5751
22.1549
42.9299
35.9704
40.0512
36.9214
23.3457
23.1364
27.1983
25.5047
25.9612
18.3961
0.445607
12.0782
39.0079
27.061
3.22577
10.1088
18.1382
7.24784
19.0597
30.9587
23.4149
6.49606
6.88897
9.0872
14.7853
3.75041
11.0197
2.19008
15.5996
23.0965
6.12704
3.84167
16.0902
0.414717
33.4357
23.3766
18.4025
5.01236
24.3869
18.1192
38.0202
32.3526
27.0797
11.6812
26.5315
4.02425
20.3567
28.5403
7.97899
1.73902
13.6034
12.4768
8.04362
17.5889
16.1945
45.2815
6.12901
19.1283
13.7584
19.2365
2.70579
15.031
29.7016
16.638
15.2602
9.64671
8.49799
7.47929
10.9635
26.7106
40.575
26.5674
33.9292
32.0992
46.5547
11.3555
15.3976
6.80171
34.1314
21.584
33.8221
17.6491
8.80002
18.4498
25.9746
19.7703
19.0281
31.0907
16.8285
21.7887
13.7468
16.8806
17.0881
0.712089
25.4344
18.6566
9.89164
39.6291
24.7761
3.88036
14.8804
23.6329
20.3743
27.1362
21.8669
0.176726
23.5579
10.2436
10.419
0.282645
25.8283
7.15897
0.954673
23.7762
14.5397
37.4821
47.4364
22.8556
8.97046
15.2922
0.12771
15.6869
0.968147
17.4409
23.9927
3.47896
3.47146
17.9047
24.2282
22.7536
3.15561
28.2172
24.0912
5.17649
7.49054
19.164
15.6793
34.181
20.1132
34.0097
9.40162
22.5836
33.0192
44.3547
45.5353
46.3449
45.1914
44.3996
4.01578
19.5043
10.6938
43.3131
31.6661
16.7562
23.6545
16.9239
25.7951
13.2729
21.8263
25.7398
26.5461
23.9752
33.0865
26.1977
29.199
27.0074
10.7231
2.54524
27.7636
20.4651
26.1932
0.836033
16.9063
12.1803
7.29827
12.462
11.2934
15.335
4.03461
17.1046
38.6922
14.902
21.4142
25.2928
3.95371
5.97519
22.24
8.23416
22.4674
39.9295
22.7179
24.1666
16.1314
9.37748
1.81219
11.9631
18.0162
31.4036
0.0586544
1.06274
4.23085
10.3902
17.832
16.8512
14.4969
19.2109
8.40567
5.84025
8.98614
4.42125
9.14309
25.9505
24.3434
15.1417
23.8349
38.8095
21.6009
19.6224
20.3319
2.55282
44.8774
39.8962
61.736
31.4356
17.5218
9.57422
14.5207
42.9713
29.4654
32.4852
1.97396
11.5666
12.1766
15.5967
27.9092
29.1658
25.4754
4.85911
8.6481
21.9801
6.50648
9.04781
17.3584
15.4074
27.9257
9.63096
28.6089
27.4988
10.0563
12.082
31.9377
6.21471
17.0149
29.7431
17.5637
32.2416
29.6746
4.67236
18.8779
22.8915
22.3902
6.62658
16.3289
27.049
44.4951
44.7365
31.2641
18.2758
6.73369
4.19453
4.99175
1.37843
22.768
32.3921
0.0529573
4.0338
20.7991
4.0553
2.01042
14.9329
28.9072
0.345731
28.4483
22.938
14.8577
31.3539
29.6806
14.6075
35.4273
17.1468
15.3053
17.0065
34.5193
33.5944
34.0495
29.8233
5.10727
6.43366
0.39795
57.1571
12.3962
32.5153
12.0101
17.3018
32.2123
16.6095
29.2704
14.2068
26.3706
28.9298
26.5089
16.1736
28.3085
8.89184
18.7593
9.9188
15.7635
8.273
39.6136
21.718
7.08298
15.7295
1.52405
12.4941
21.0535
16.2145
16.7815
13.7747
24.1256
15.9998
4.03011
13.454
6.56115
26.898
37.1612
17.2119
40.1707
43.5832
33.9097
6.67019
10.1258
3.41609
20.99
9.10172
23.7907
32.943
4.65991
17.032
8.24467
13.0923
16.561
21.4847
30.2725
23.5763
16.6271
21.9756
39.1217
28.2553
31.302
38.3569
12.084
34.5275
16.3414
42.2973
36.6048
19.6314
23.249
46.6505
14.4341
6.07834
21.6804
2.8472
49.4138
6.47436
4.60975
5.61043
22.3905
29.5941
25.2989
30.084
36.9397
29.8741
9.03119
10.6715
7.67529
18.1659
11.8178
5.25652
25.17
17.8442
4.84692
28.4921
16.6533
21.4866
1.82477
1.20263
17.1925
25.2836
14.2498
15.2883
18.9723
18.1441
16.8378
0.713934
5.14848
14.2707
23.4785
17.2683
29.718
23.833
8.11818
23.2817
33.5056
23.4927
11.7078
10.3539
21.1923
6.20033
21.3375
15.4458
7.11715
1.22353
19.0189
4.5534
11.2247
21.4763
19.1509
16.6574
31.1952
16.8646
28.1491
34.1844
39.9871
27.7995
6.38729
22.0176
14.5001
34.9418
1.32879
2.08667
35.7117
16.9125
29.2402
45.1982
28.8274
23.6907
21.6804
8.16585
20.8646
19.0337
23.9081
17.9757
33.1924
17.2241
5.16884
6.14928
26.8102
33.4587
7.87257
17.7668
18.3325
12.0279
12.5326
9.29928
18.532
9.88751
5.12308
7.45195
36.9229
9.1304
17.3722
3.87701
49.9061
27.7561
6.03506
11.6108
9.54855
17.009
29.718
7.90944
24.3124
32.672
23.6403
44.1045
15.235
5.93386
1.29124
22.2929
28.8646
15.4458
1.68492
3.95468
15.1536
0.049565
9.92306
19.221
37.0421
33.163
16.561
24.6431
23.5662
25.3732
35.1249
28.434
51.3597
29.1005
13.4081
33.51
21.715
16.8967
24.7979
35.9852
23.6525
30.018
33.975
15.2691
1.95156
19.2209
16.9802
7.87948
15.1215
11.2628
19.4866
30.084
34.8275
18.5637
7.66735
7.85933
44.2447
14.073
4.38547
10.9953
5.89514
0.0868016
1.46107
6.07369
25.4478
14.9352
9.19684
2.92341
35.548
30.7874
11.526
30.4273
49.9061
5.77584
10.0752
18.3867
6.95965
5.60952
33.3119
27.6277
12.0132
26.6969
29.4209
24.0658
27.4165
20.4487
0.00975388
0.287886
6.53107
24.303
22.4495
11.7764
5.49182
1.50614
5.62583
3.83615
30.0944
3.22417
19.1509
37.8855
30.0006
8.00358
50.2369
19.8001
32.3706
18.359
5.89558
24.7194
4.90535
20.6104
16.9966
19.3031
32.0596
25.803
16.9796
18.7097
35.8379
4.53001
27.3809
13.823
34.5239
15.8053
22.0943
7.68036
17.9757
34.7406
25.3478
5.37304
8.37352
38.7653
25.067
4.27249
17.7668
23.2245
4.50492
5.70915
8.99866
10.474
14.6327
12.7603
31.8323
35.3237
4.13845
17.084
30.4273
9.20881
0.0867768
19.9947
15.6982
13.1255
28.7166
41.0299
12.1162
28.832
26.4145
8.97546
30.0859
16.4559
11.7157
28.5095
6.86809
23.9976
22.4495
25.5699
2.74914
7.55471
9.85937
19.221
20.3228
36.1322
16.1093
31.154
26.9173
29.3237
19.9312
19.9131
39.7723
11.5039
29.018
15.7044
15.1024
38.176
22.3474
15.6421
50.0512
35.193
17.6552
20.6021
8.43025
20.5908
12.3136
33.1751
7.83416
25.6752
0.84161
34.8275
13.7707
25.0445
10.2184
28.09
26.7798
2.72741
10.9953
20.2403
22.663
10.1425
11.3857
29.0243
5.50562
12.7603
31.8323
25.4978
26.2005
8.65995
41.3278
1.39996
4.67357
26.7188
5.60952
29.3432
21.6761
13.2428
37.1893
23.632
7.0583
30.0859
27.6577
6.92552
12.3356
6.86809
24.8969
11.7764
4.17898
8.18759
1.19396
3.83615
30.0944
46.8271
0.117112
50.6252
39.3536
50.2369
12.4011
35.5772
18.359
34.8775
3.2777
2.08135
34.3564
17.9404
5.08646
24.7892
26.8916
25.7351
31.7409
14.234
9.35071
0.061435
30.6028
12.2428
26.2164
28.3071
25.751
28.8871
34.7406
22.4103
1.64804
23.1129
10.036
19.7996
1.13237
27.8339
14.5582
6.85126
2.99343
23.0949
6.70831
25.5464
20.681
7.54698
6.44488
26.7898
13.1255
5.54
17.1637
1.31146
33.7585
4.73323
5.51033
7.32558
20.1374
25.5699
3.08719
11.1492
25.4998
20.3228
36.1322
8.35055
38.6472
28.0046
12.4011
26.1423
19.9312
39.6113
28.7361
9.51289
1.5436
22.6598
9.83916
16.5148
6.8643
19.2122
45.9839
17.6552
10.5589
17.1015
27.5106
10.688
21.1045
[truncated: 215 more rows]
