# Supplementary material for: Variations of intracellular density during the cell cycle arise from tip-growth regulation in fission yeast
Source: eLife journal article supplement (doi:10.7554/elife.64901), 2021-06-08

**A**

Brightfield

Untreated

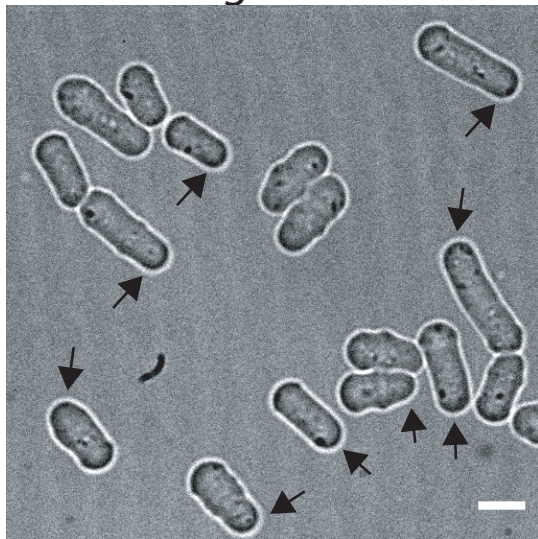

FITC

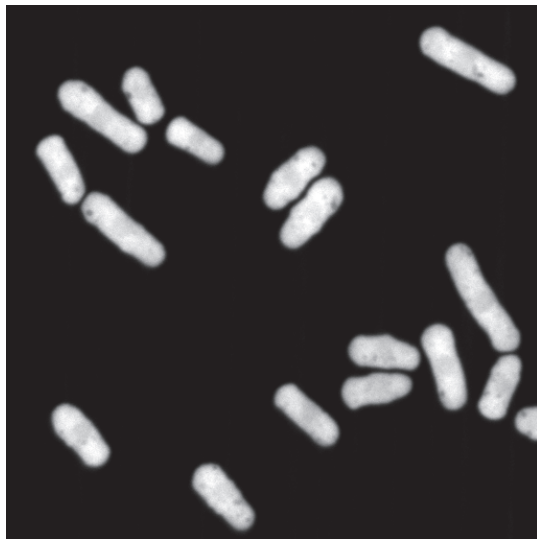**B**

Normalized FITC Intensity

NE

OE

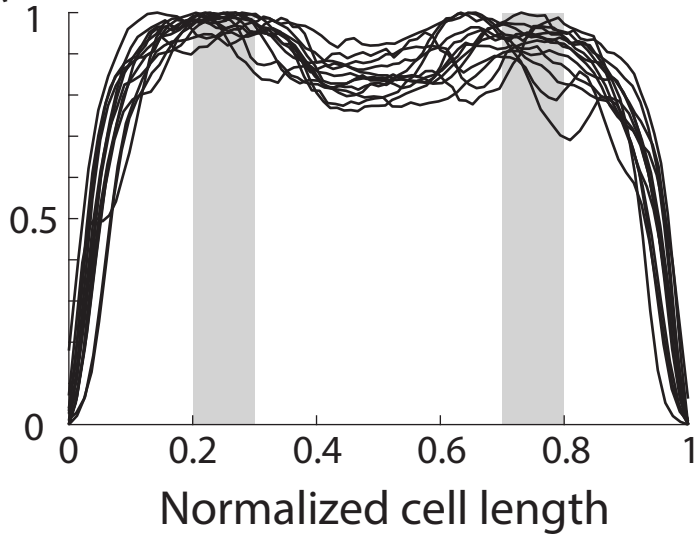**C**

Normalized FITC Intensity

Untreated

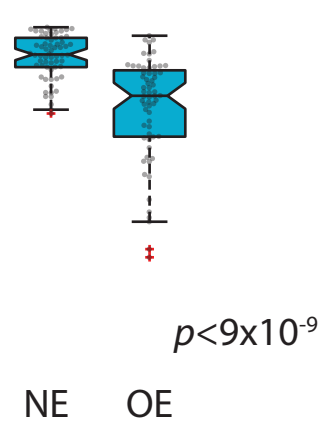

RNAse-treated

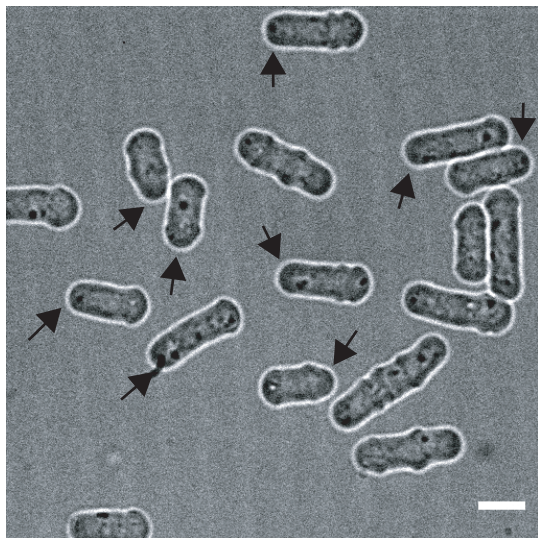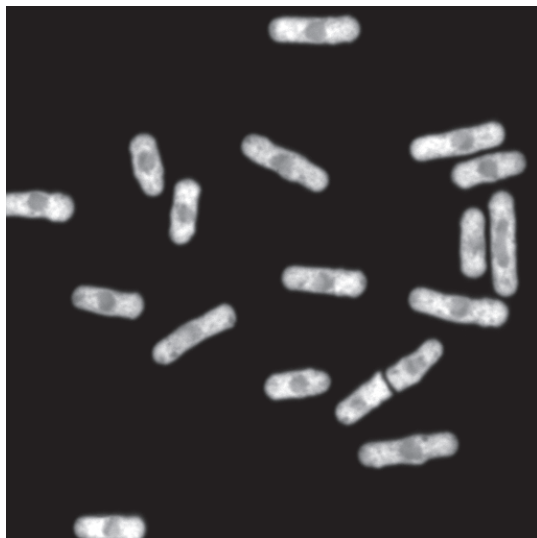

Normalized FITC Intensity

NE

OE

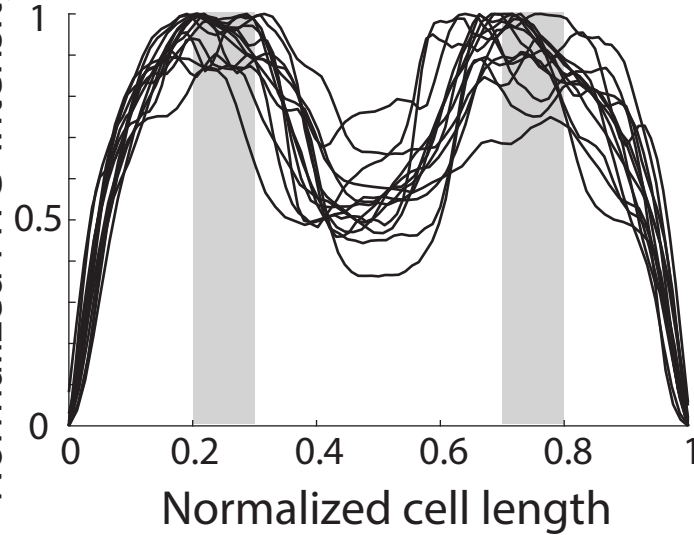

Normalized FITC Intensity

RNAse treated

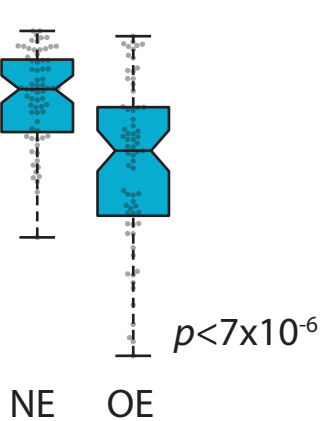

Supplement: supp [file elife-64901-supp-v1.zip]
