# Supplementary figures and images for: Variations of intracellular density during the cell cycle arise from tip-growth regulation in fission yeast
Source: eLife journal article supplement (doi:10.7554/elife.64901), 2021-06-08

A

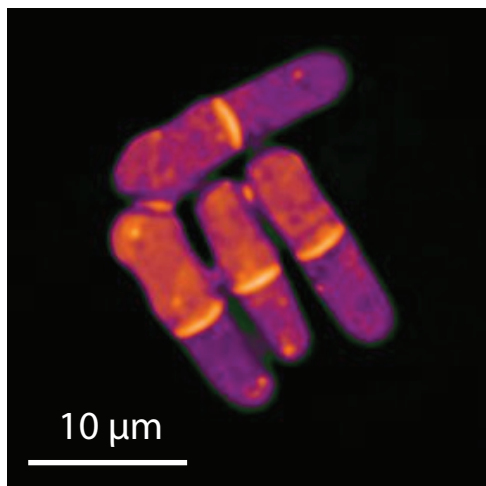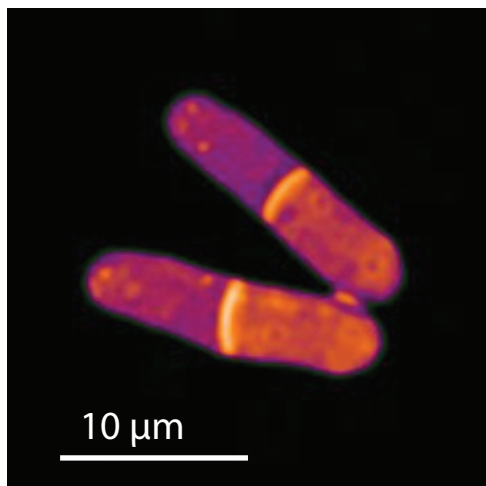

B

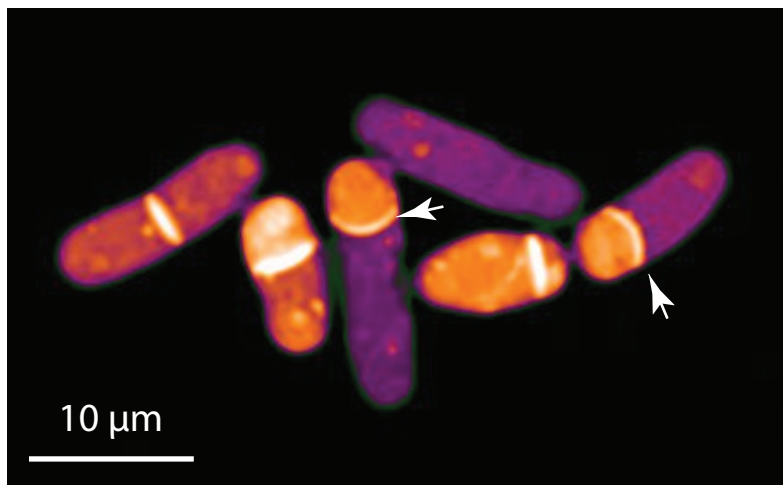

Supplement: supp [file elife-64901-supp-v1.zip]

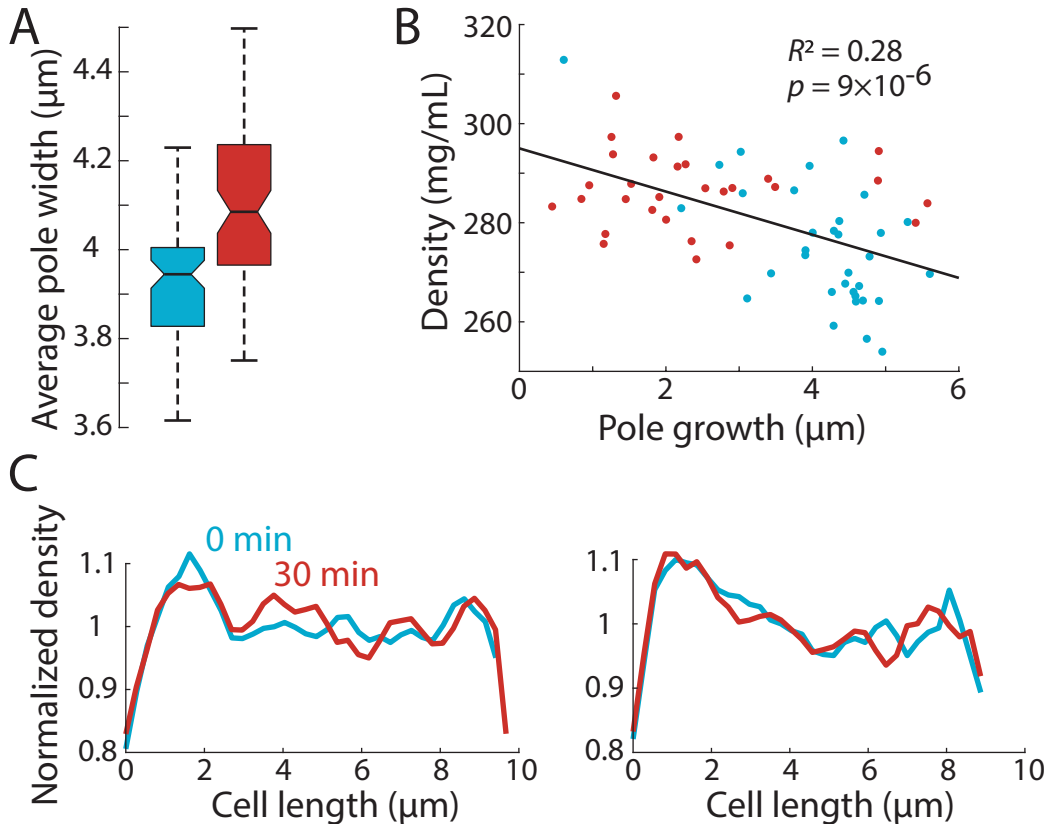

Supplement: supp [file elife-64901-supp-v1.zip]

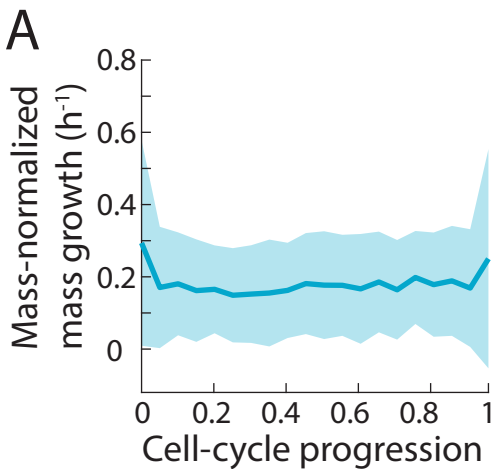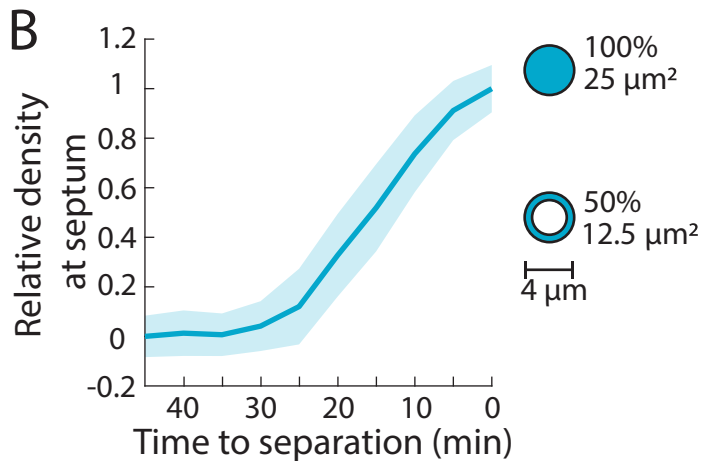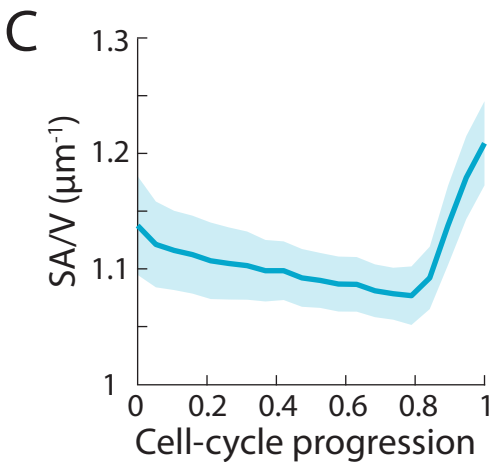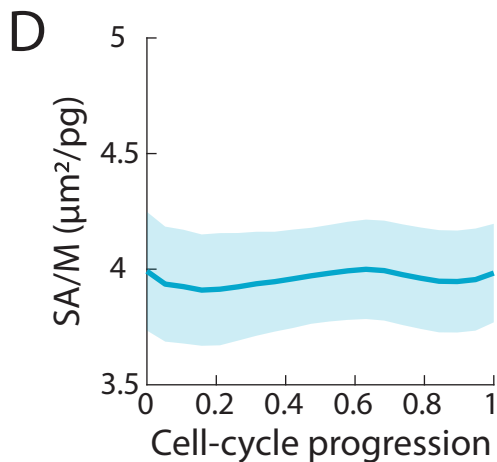

Supplement: supp [file elife-64901-supp-v1.zip]

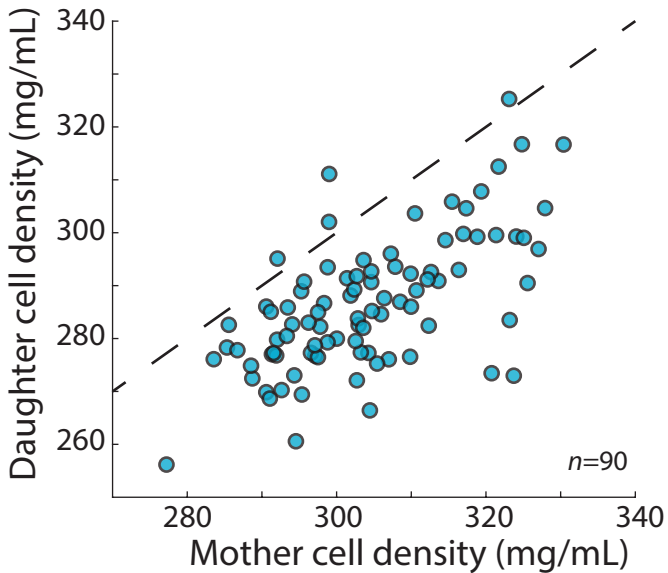

Supplement: supp [file elife-64901-supp-v1.zip]

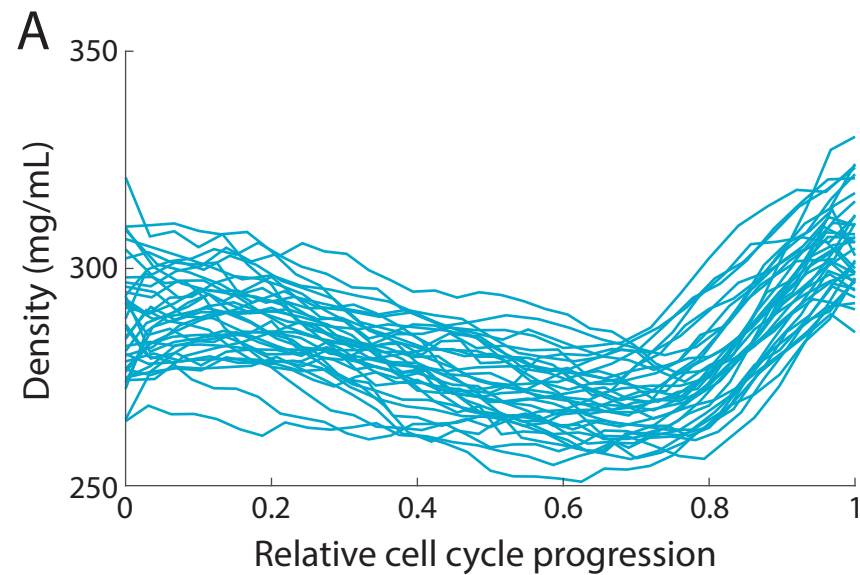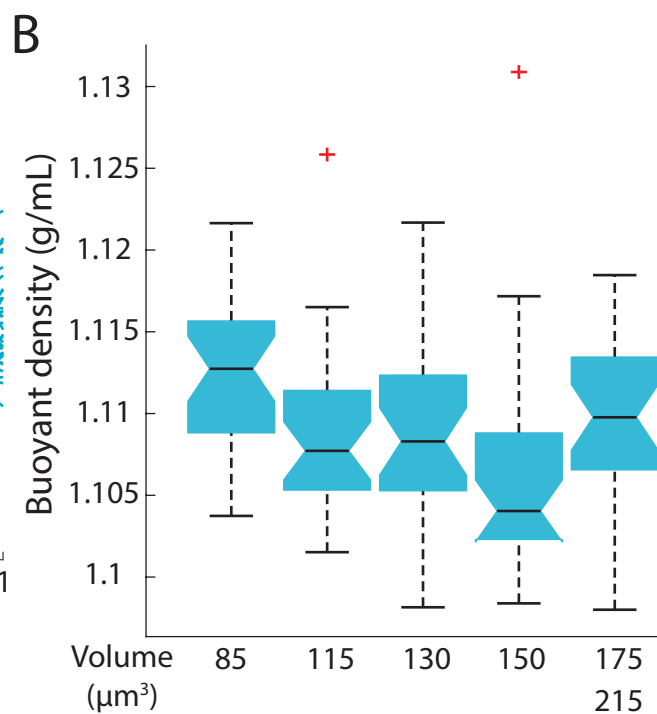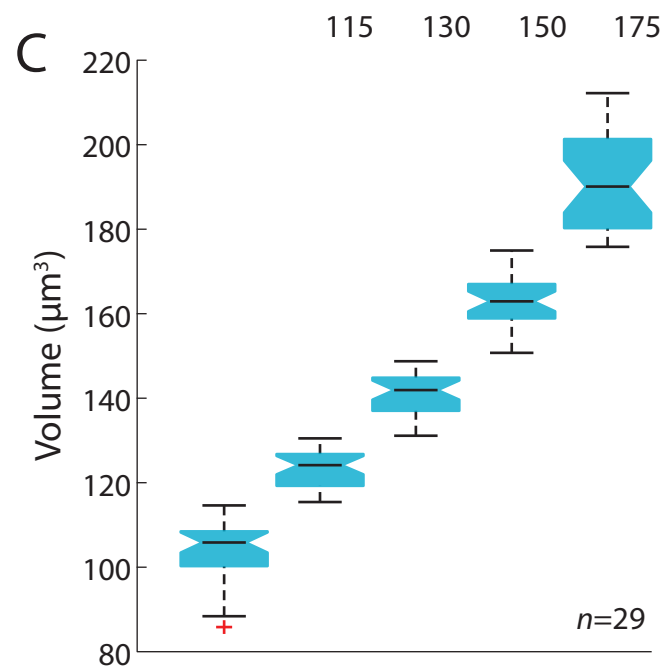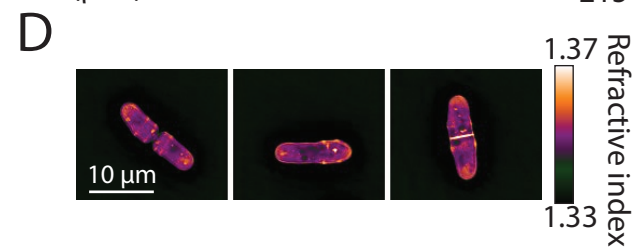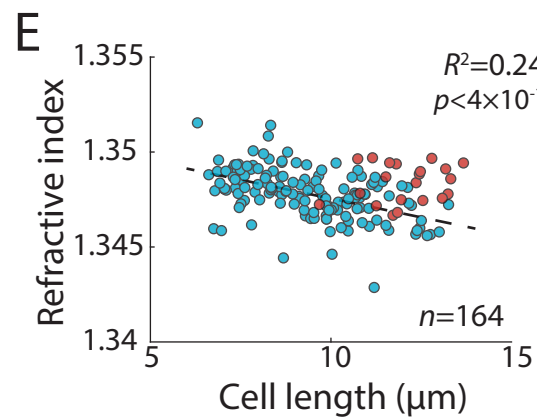

Supplement: supp [file elife-64901-supp-v1.zip]

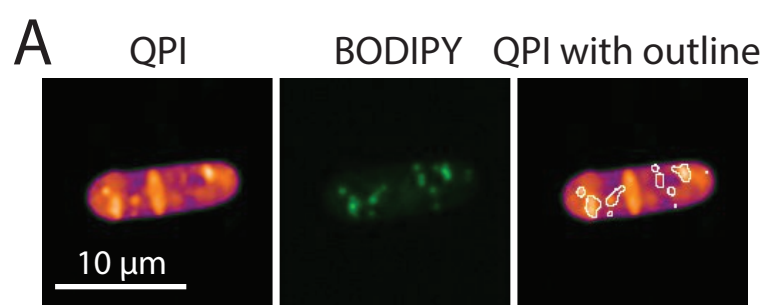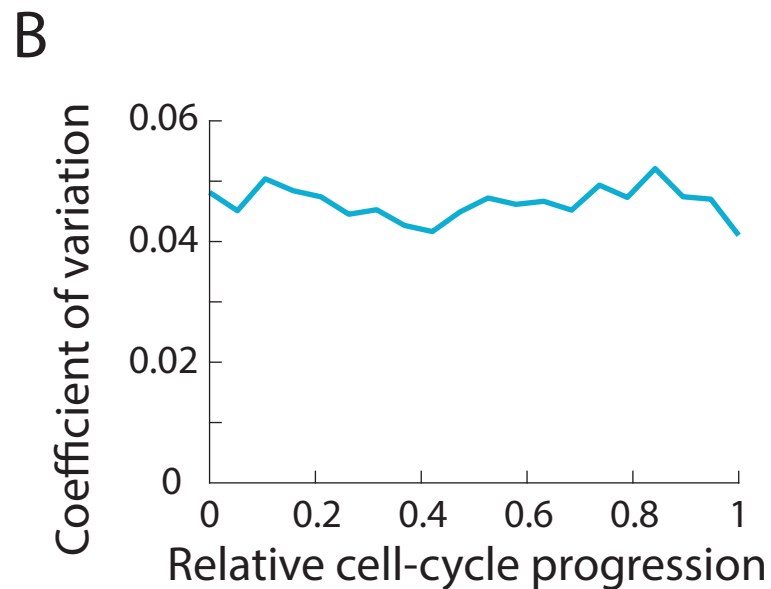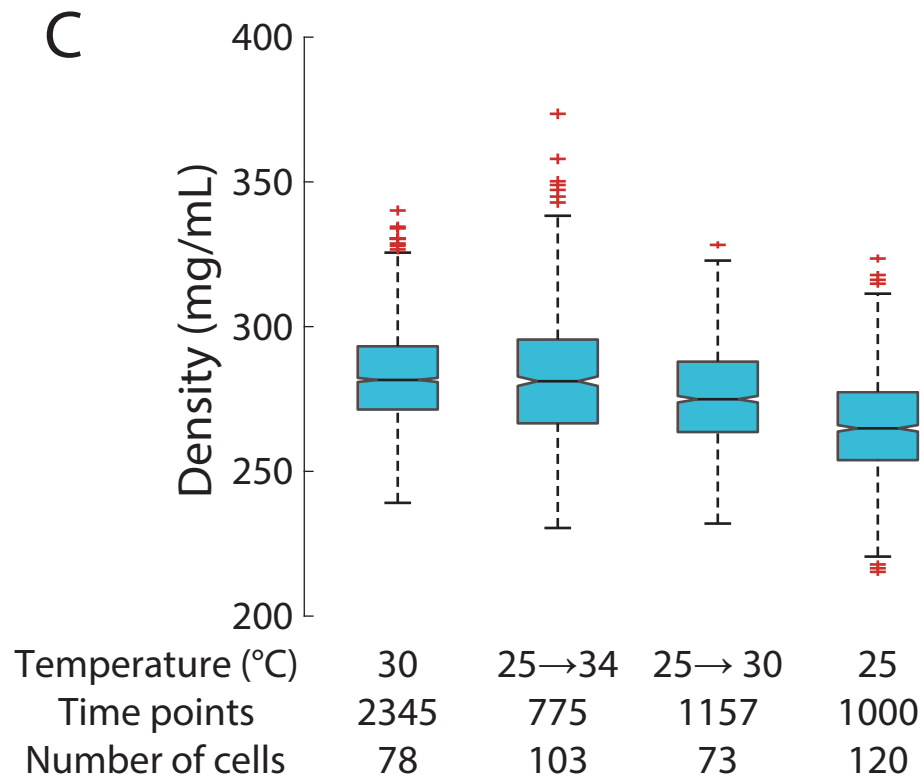

Supplement: supp [file elife-64901-supp-v1.zip]

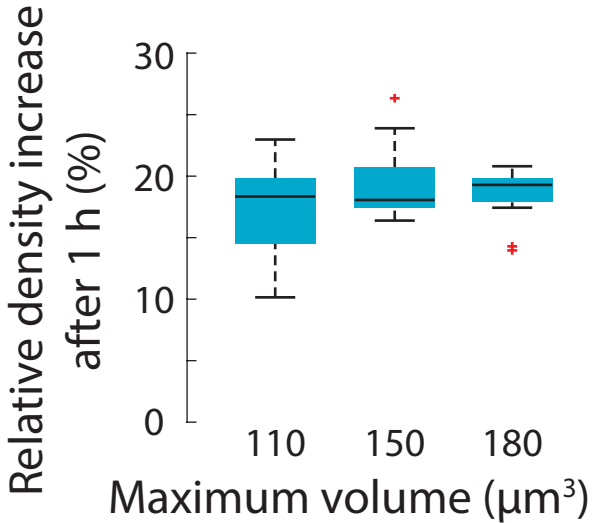

Supplement: supp [file elife-64901-supp-v1.zip]
